# Supplementary material for: RNA methylomes reveal the m6A-mediated regulation of DNA demethylase gene SlDML2 in tomato fruit ripening
Source: Genome Biol. 2019 Aug 6;20:156. doi: 10.1186/s13059-019-1771-7 (PMC6683476; doi:10.1186/s13059-019-1771-7)
Supplement: Supplementary file 2 — Supplementary Table S1. (XLSX 11 kb) [file 13059_2019_1771_MOESM2_ESM.xlsx]

## Sheet: Table S1
Table S1. A summary of m6A-seq information in wild-type and Cnr mutant fruit. WT, wild-type.
Samples	WT-39DPA Replicate 1	WT-39DPA Replicate 2	WT-39DPA Replicate 3	WT-42DPA Replicate 1	WT-42DPA Replicate 2	WT-42DPA Replicate 3	Cnr-42DPA Replicate 1	Cnr-42DPA Replicate 2	Cnr-42DPA Replicate 3
RNA type	mRNA	mRNA	mRNA	mRNA	mRNA	mRNA	mRNA	mRNA	mRNA
all reads (IP)	22742879	22776751	22795558	22365631	21975398	22962904	23333384	20537955	21333882
all reads (Input)	23856676	26826890	25410467	26278365	20247214	28474873	28437176	26751895	29031933
mapped reads (IP)	21973129	21894506	22152430	21533634	21173651	21929215	22651397	19949958	20797685
mapped reads (Input)	22935251	25535424	24492345	24978935	19411190	27205455	27011293	25642643	27613082
uniquely mapped reads (IP)	21793465	21732275	22007312	21335229	21001720	21720505	22437966	19699857	20623157
uniquely mapped reads (Input)	22568431	25128988	24103691	24589267	19118956	26762389	26588850	25237982	27175122
identified peaks	10407	9743	10225	9760	9946	9246	9959	10127	9746
identified summits	10823	10067	10591	10077	10280	9557	10267	10516	10019
