# Supplementary material for: RNA methylomes reveal the m6A-mediated regulation of DNA demethylase gene SlDML2 in tomato fruit ripening
Source: Genome Biol. 2019 Aug 6;20:156. doi: 10.1186/s13059-019-1771-7 (PMC6683476; doi:10.1186/s13059-019-1771-7)
Supplement: Supplementary file 5 — Supplementary Tables S6–S9. (XLSX 323 kb) [file 13059_2019_1771_MOESM5_ESM.xlsx]

## Sheet: Table S6
Table S6. Transcripts with higher m6A peak enrichment in wild-type fruits at 39 DPA compared to 42 DPA. WT, wild-type; DPA, days post-anthesis.
Overlapped gene ID	Chromosome	Peak Start	Peak End	Overlap_Begin	Overlap_Center	Overlap_End	m6A enrichment in peaks						Fold change in m6A enrichment (39DPA/42DPA)	P value	Gene descriptions
							WT-39DPA Replicate 1	WT-39DPA Replicate 2	WT-39DPA Replicate 3	WT-42DPA Replicate1	WT-42DPA Replicate 2	WT-42DPA Replicate 3
Solyc01g005540.3	SL3.0ch01	359979	360200	LastExon	UTR3	UTR3	6.65899	6.30149	6.69799	3.01628	3.02897	3.43284	2.0741	5.57687e-05	Lysine--tRNA ligase (AHRD V3.3 *** K4ASC0_SOLLC)
Solyc01g008290.3	SL3.0ch01	2339104	2339398	LastExon	LastExon	UTR3	10.3126	12.1855	12.2996	7.70398	7.1989	7.14441	1.57832	0.0165947	Dihydroorotate dehydrogenase (quinone), mitochondrial (AHRD V3.3 *** K4AT27_SOLLC)
Solyc01g008340.3	SL3.0ch01	2404828	2405293	LastIntron	UTR3	UTR3	8.9013	7.61325	9.76748	5.58574	5.30076	4.79154	1.67636	0.0197483	L19 ribosomal protein
Solyc01g010880.3	SL3.0ch01	6258756	6258978	LastExon	UTR3	UTR3	5.12685	4.86028	4.69459	3.61771	2.56488	3.1509	1.57302	0.0167184	RING/FYVE/PHD zinc finger superfamily protein (AHRD V3.3 *** AT2G02960.6)
Solyc01g014490.3	SL3.0ch01	13909599	13909881	LastExon	UTR3	UTR3	7.96695	6.70197	7.72732	4.66161	3.34708	3.11429	2.01351	0.00427693	DNA topoisomerase 6 subunit B (AHRD V3.3 *** K4AU86_SOLLC)
Solyc01g049910.3	SL3.0ch01	47050117	47050354	LastExon	UTR3	UTR3	21.2734	20.8127	23.2039	13.7523	16.9084	12.4826	1.51333	0.0146912	Protease m50 membrane-bound transcription factor site 2 protease, putative (AHRD V3.3 *** A0A061F386_THECC)
Solyc01g056690.3	SL3.0ch01	55916172	55916424	Intron10	LastIntron	LastIntron	7.85372	7.89149	9.34574	4.5605	4.20013	4.65932	1.86968	0.0108627	Protein kinase, putative (AHRD V3.3 *** B9SJN7_RICCO)
Solyc01g065590.1	SL3.0ch01	71771023	71771349	LastIntron	UTR3	Intergenic	398.48	475.951	437.405	47.9994	24.7253	50.1887	10.6729	0.00120661	Cell wall-associated hydrolase (AHRD V3.3 *-* A0A061S5B2_9CHLO)
Solyc01g067080.3	SL3.0ch01	75227761	75228236	LastExon	UTR3	UTR3	5.77099	6.94436	6.98989	3.8371	4.12068	3.4398	1.7289	0.00902128	dynein beta chain, ciliary protein (AHRD V3.3 *** AT3G21400.1)
Solyc01g067480.3	SL3.0ch01	76001626	76001944	LastIntron	LastExon	UTR3	13.4741	13.3665	15.5079	7.96232	7.23734	6.72918	1.93118	0.00325965	Acyl-CoA-binding domain-containing protein 4 (AHRD V3.3 *** A0A0B0MQV8_GOSAR)
Solyc01g067530.3	SL3.0ch01	76095966	76096365	UTR3	UTR3	UTR3	6.36152	5.98424	5.64613	3.54686	4.25987	3.1686	1.6393	0.0058589	GTPase obg (AHRD V3.3 *** W9RHI6_9ROSA)
Solyc01g067710.3	SL3.0ch01	76466898	76467176	UTR3	UTR3	UTR3	3.944	3.59587	4.15122	2.58244	2.29881	2.32375	1.62263	0.00337556	(Sodium/potassium)/proton exchanger 3
Solyc01g080160.3	SL3.0ch01	79211451	79211780	LastExon	LastExon	UTR3	10.5041	12.7691	12.494	6.85362	7.8271	6.42861	1.69438	0.0079322	DUF21 domain-containing protein (AHRD V3.3 *** A0A0B2P6Y2_GLYSO)
Solyc01g080220.3	SL3.0ch01	79289585	79289995	LastExon	LastExon	Intergenic	5.0238	4.41053	5.04893	3.13006	3.62067	2.76233	1.52246	0.00753682	Endo-1,3-1,4-beta-d-glucanase, putative (AHRD V3.3 *** B9RSS3_RICCO)
Solyc01g080415.1	SL3.0ch01	79510762	79510975	LastIntron	UTR3	UTR3	4.70815	4.34346	4.30744	1.9196	1.85019	1.48248	2.54348	0.000134731	Cox19-like CHCH family protein (AHRD V3.3 --* AT5G18920.2)
Solyc01g081430.3	SL3.0ch01	80500427	80501036	LastExon	LastExon	Intergenic	3.2361	3.04096	3.47959	2.00048	2.55488	1.89803	1.51186	0.0153291	DNA replication and repair recF (AHRD V3.3 *-* A0A0B0P660_GOSAR)
Solyc01g081440.3	SL3.0ch01	80500427	80501036	UTR3	UTR3	Intergenic	3.2361	3.04096	3.47959	2.00048	2.55488	1.89803	1.51186	0.0153291	nuclear factor 1 A-type protein (DUF1005) (AHRD V3.3 *** AT5G17640.1)
Solyc01g090990.3	SL3.0ch01	84556730	84557079	LastIntron	UTR3	UTR3	7.40745	7.6209	8.1867	5.02191	4.93419	4.70307	1.58365	0.00254064	vesicle-associated membrane protein
Solyc01g091690.3	SL3.0ch01	85146026	85146441	LastExon	UTR3	UTR3	2.21013	2.05684	2.11064	1.22158	1.07143	1.25534	1.79734	0.000266474	S-adenosyl-L-methionine-dependent methyltransferases superfamily protein (AHRD V3.3 *** AT4G00750.1)
Solyc01g091710.3	SL3.0ch01	85187180	85187428	LastExon	Intergenic	Intergenic	3.4006	2.66932	3.37694	2.0859	2.28319	1.83798	1.52195	0.0275397	F-box protein (AHRD V3.3 *** A0A0B2RBZ5_GLYSO)
Solyc01g097600.2	SL3.0ch01	88250403	88250768	UTR3	UTR3	Intergenic	14.1781	17.5844	17.8813	10.3245	10.4739	9.64883	1.63049	0.0283088	Pseudouridine synthase family protein (AHRD V3.3 *** AT3G04820.1)
Solyc01g097880.3	SL3.0ch01	88455298	88455641	LastExon	LastExon	UTR3	3.36263	3.45284	3.56158	2.17178	2.37473	2.04014	1.57547	0.00106217	Cytidine/deoxycytidylate deaminase family protein (AHRD V3.3 *** AT5G28050.3)
Solyc01g098200.3	SL3.0ch01	88662986	88663346	LastExon	UTR3	UTR3	6.14124	6.70672	7.44657	4.64134	4.74804	3.76604	1.54268	0.00906131	Vesicle-associated protein 1-1 (AHRD V3.3 *** A0A1D1Y4C8_9ARAE)
Solyc01g098455.1	SL3.0ch01	88850763	88850996	Intron1	Intron1	Intron1	5.30986	4.79259	5.11355	2.84474	3.33807	2.34264	1.78477	0.00615314	Homogentisate 1,2-dioxygenase (AHRD V3.3 *-* Q9M6U1_SOLLC)
Solyc01g098460.3	SL3.0ch01	88858466	88858795	Exon9	Exon9	UTR3	11.1326	11.5005	12.1442	6.99563	8.11762	6.2774	1.62582	0.00467528	Methyltransferase-like protein (AHRD V3.3 *** K4B0N3_SOLLC)
Solyc01g098630.3	SL3.0ch01	88962596	88963034	LastIntron	UTR3	UTR3	12.8761	13.9996	14.5526	9.36309	9.06952	8.26476	1.55177	0.00206701	Mitochondrial inner membrane translocase subunit Tim44 (AHRD V3.3 *** A0A0K9P2C5_ZOSMR)
Solyc01g099310.3	SL3.0ch01	89486651	89486872	UTR3	Intergenic	Intergenic	7.76648	7.33707	7.72892	5.11429	5.26431	4.40251	1.54471	0.00293776	cyclinH1_1
Solyc01g099640.3	SL3.0ch01	89698475	89698754	LastIntron	LastIntron	LastIntron	3.44057	2.80654	3.63975	1.98932	2.19435	2.02246	1.59308	0.032954	Zeta-carotene desaturase, chloroplastic/chromoplastic (AHRD V3.3 --* ZDS_ONCHC)
Solyc01g099645.1	SL3.0ch01	89698475	89698754	UTR3	UTR3	UTR3	3.44057	2.80654	3.63975	1.98932	2.19435	2.02246	1.59308	0.032954	alpha/beta-Hydrolases superfamily protein (AHRD V3.3 --* AT2G36290.2)
Solyc01g100080.3	SL3.0ch01	90047819	90048369	LastIntron	LastExon	UTR3	8.50408	8.75771	9.90836	5.84339	5.07412	4.24812	1.79156	0.00322081	Single-stranded DNA-binding protein (AHRD V3.3 *** G7I9F0_MEDTR)
Solyc01g102265.1	SL3.0ch01	90974318	90974572	LastExon	LastExon	UTR3	5.98622	6.0253	5.71479	3.6712	4.27937	3.21383	1.58775	0.0129925	RING/U-box superfamily protein (AHRD V3.3 *** AT3G42830.1)
Solyc01g102270.2	SL3.0ch01	90974318	90974572	UTR3	UTR3	UTR3	5.98622	6.0253	5.71479	3.6712	4.27937	3.21383	1.58775	0.0129925	Jojoba acyl CoA reductase-related male sterility protein (AHRD V3.3 --* AT4G33790.2)
Solyc01g102280.3	SL3.0ch01	90974318	90974572	UTR5	UTR5	UTR5	5.98622	6.0253	5.71479	3.6712	4.27937	3.21383	1.58775	0.0129925	Glutamate synthase 1 [NADH], chloroplastic (AHRD V3.3 --* GLT1_ORYSJ)
Solyc01g103040.3	SL3.0ch01	91589174	91589402	LastIntron	UTR3	UTR3	25.9148	22.4396	24.1534	17.2918	12.5607	15.2254	1.6085	0.0073351	Mitotic spindle assembly checkpoint protein MAD1 (AHRD V3.3 *** A0A0B2P2M0_GLYSO)
Solyc01g103890.3	SL3.0ch01	92285500	92285767	LastExon	UTR3	UTR3	4.93675	6.13723	4.9899	3.33161	4.20224	3.07755	1.51383	0.0256313	Magnesium transporter MRS2-like protein (AHRD V3.3 *** G7L8U0_MEDTR)
Solyc01g106420.3	SL3.0ch01	94221184	94221522	LastExon	Intergenic	Intergenic	16.784	18.6768	21.0678	9.64464	10.8657	9.11767	1.90795	0.00969925	Major facilitator superfamily protein (AHRD V3.3 *** AT2G22730.3)
Solyc01g106430.3	SL3.0ch01	94221184	94221522	UTR3	Intergenic	Intergenic	16.784	18.6768	21.0678	9.64464	10.8657	9.11767	1.90795	0.00969925	Inorganic pyrophosphatase (AHRD V3.3 *** A0A124SF20_CYNCS)
Solyc01g107360.3	SL3.0ch01	94829958	94830203	UTR3	UTR3	Intergenic	11.9951	11.453	10.6256	6.72356	6.33817	4.8932	1.89773	0.0021298	MAR-binding filament-like protein 1 isoform 1 (AHRD V3.3 *** A0A061E182_THECC)
Solyc01g107380.3	SL3.0ch01	94829958	94830203	LastIntron	LastIntron	LastIntron	11.9951	11.453	10.6256	6.72356	6.33817	4.8932	1.89773	0.0021298	Katanin p80 WD40 repeat-containing subunit B1 homolog (AHRD V3.3 *-* K4B9A4_SOLLC)
Solyc01g107990.3	SL3.0ch01	95269517	95269971	LastExon	UTR3	UTR3	5.71812	5.43227	6.06635	3.86453	4.18561	3.23467	1.52565	0.00640649	PI-PLC X domain-containing protein (AHRD V3.3 *** A0A0B2PDX2_GLYSO)
Solyc01g108660.3	SL3.0ch01	95784066	95784317	Exon13	UTR3	LastIntron	2.84146	3.11922	2.9325	1.8606	2.17931	1.80751	1.52087	0.00301733	N-acetyl-gamma-glutamyl-phosphate reductase (AHRD V3.3 *** S8C8Q1_9LAMI)
Solyc01g109130.3	SL3.0ch01	96094220	96094509	LastIntron	LastExon	UTR3	8.32585	8.14064	9.09247	4.95991	5.67746	4.28819	1.71243	0.00284486	Proteasome assembly chaperone 2 (AHRD V3.3 *** K4B3C7_SOLLC)
Solyc01g109970.3	SL3.0ch01	96710327	96710598	Intron6	Exon7	UTR3	14.2006	16.6465	15.5054	9.16628	9.40309	8.29681	1.72531	0.00435807	SNF2 domain-containing protein / helicase domain-containing protein (AHRD V3.3 *** AT2G16390.2)
Solyc01g109980.3	SL3.0ch01	96710327	96710598	UTR3	UTR3	UTR3	14.2006	16.6465	15.5054	9.16628	9.40309	8.29681	1.72531	0.00435807	BEL1-related homeotic protein 30 (AHRD V3.3 *** Q8LLD8_SOLTU)
Solyc01g110370.3	SL3.0ch01	97001813	97002086	UTR3	UTR3	UTR3	10.2174	11.4653	13.7195	7.23981	7.96438	6.02594	1.66755	0.0254866	Zinc finger, B-box (AHRD V3.3 *** A0A118K2C5_CYNCS)
Solyc02g005200.3	SL3.0ch02	7477942	7478217	Exon4	LastIntron	LastIntron	1.98142	2.11603	2.35706	1.33192	1.34476	1.21382	1.65904	0.00892217	RNA binding protein (AHRD V3.3 *** AT3G08010.1)
Solyc02g005310.2	SL3.0ch02	8042495	8043039	Intron3	Intron3	Intron3	10.2193	11.4221	11.9412	6.70537	7.74894	5.97091	1.64417	0.0037763	DNA glycosylase (AHRD V3.3 *** A0A103X5G9_CYNCS)
Solyc02g014130.2	SL3.0ch02	15499427	15499722	Intron12	UTR3	Intron13	6.2654	6.79771	7.43106	3.68717	3.83559	3.67244	1.83062	0.0102371	Tudor/PWWP/MBT domain-containing protein (AHRD V3.3 *** AT5G23150.3)
Solyc02g014150.3	SL3.0ch02	15690785	15691300	Intron7	LastIntron	UTR3	16.2753	14.5172	17.5952	11.1782	8.56834	9.79079	1.63819	0.00622433	Photosystem II stability/assembly factor HCF136 (AHRD V3.3 *** G7JPH8_MEDTR)
Solyc02g024050.3	SL3.0ch02	25351142	25351387	LastExon	LastExon	UTR3	9.48763	8.32767	8.30202	4.50014	4.74686	3.6931	2.01832	0.00114439	Ferredoxin--NADP reductase (AHRD V3.3 *** K4B553_SOLLC)
Solyc02g032970.3	SL3.0ch02	30056852	30057307	LastIntron	LastExon	UTR3	15.3114	16.0081	16.9406	11.1285	10.5434	10.2628	1.51121	0.0018315	ATP-dependent zinc metalloprotease FtsH (AHRD V3.3 *** A0A0B0PX39_GOSAR)
Solyc02g036270.3	SL3.0ch02	30965955	30966282	UTR3	UTR3	UTR3	8.59593	7.05662	8.271	4.93762	4.85544	4.07232	1.72542	0.0068397	Disease resistance protein (NBS-LRR class) family (AHRD V3.3 *-* AT5G38350.1)
Solyc02g036280.3	SL3.0ch02	30965955	30966282	LastIntron	LastIntron	LastIntron	8.59593	7.05662	8.271	4.93762	4.85544	4.07232	1.72542	0.0068397	Pvr4 (AHRD V3.3 *-* A0A1D5AHY8_CAPAN)
Solyc02g036290.3	SL3.0ch02	30965955	30966282	Intron4	UTR3	UTR3	8.59593	7.05662	8.271	4.93762	4.85544	4.07232	1.72542	0.0068397	malonyl-CoA decarboxylase family protein (AHRD V3.3 *-* AT4G04320.2)
Solyc02g063050.3	SL3.0ch02	35641056	35641321	LastIntron	LastExon	UTR3	18.2877	20.0574	19.4761	12.0964	11.8808	10.6359	1.67051	0.000400455	Tripartite motif-containing 29 (AHRD V3.3 *** A0A0B0P7U5_GOSAR)
Solyc02g063300.3	SL3.0ch02	35912736	35913033	LastExon	LastExon	UTR3	6.91128	7.35684	7.51401	4.69517	4.20879	4.8806	1.58018	0.000619433	carboxypeptidase (AHRD V3.3 *** AT5G38060.1)
Solyc02g063490.3	SL3.0ch02	36110418	36110748	LastIntron	UTR3	UTR3	4.96698	4.16717	5.05724	2.59068	2.50654	2.34365	1.90722	0.0114547	Malate dehydrogenase (AHRD V3.3 *** K4B6N4_SOLLC)
Solyc02g065350.3	SL3.0ch02	37120274	37120571	UTR3	UTR3	UTR3	3.41501	3.46267	2.9937	2.35853	2.30942	1.81904	1.52172	0.00816185	B3 domain-containing transcription factor VRN1 (AHRD V3.3 *** A0A0B2Q684_GLYSO)
Solyc02g065360.3	SL3.0ch02	37120274	37120571	Intron4	Intron5	Intron5	3.41501	3.46267	2.9937	2.35853	2.30942	1.81904	1.52172	0.00816185	MRNA, clone: rafl24-09-C04, putative isoform 1 (AHRD V3.3 *** A0A061DG15_THECC)
Solyc02g067060.3	SL3.0ch02	37862398	37862733	UTR3	UTR3	UTR3	5.84247	4.91496	5.71035	2.37965	3.33602	2.94912	1.90054	0.00293925	Hexosyltransferase (AHRD V3.3 *** K4B738_SOLLC)
Solyc02g068930.3	SL3.0ch02	39393686	39394028	LastExon	UTR3	UTR3	7.61592	7.30221	7.16562	5.3094	4.87856	4.39414	1.51444	0.00368661	Cytochrome c6 (AHRD V3.3 *** D7MKY9_ARALL)
Solyc02g069770.3	SL3.0ch02	40163930	40164173	LastExon	LastExon	UTR3	7.03813	7.80002	7.24201	4.97543	4.41578	4.36642	1.60494	0.000846801	WD40-repeat domain-contaning protein
Solyc02g071280.3	SL3.0ch02	41344712	41345040	LastExon	LastExon	UTR3	4.43279	5.40033	4.87067	3.13769	3.31776	3.14418	1.53171	0.0220944	16S rRNA processing protein RimM family (AHRD V3.3 *** AT5G46420.1)
Solyc02g071880.3	SL3.0ch02	41811084	41811472	LastExon	UTR3	UTR3	8.49496	10.036	9.75431	6.05972	6.78234	6.00819	1.50052	0.00955642	Receptor-like protein kinase (AHRD V3.3 *** B9I1R1_POPTR)
Solyc02g072105.1	SL3.0ch02	41965294	41965546	LastExon	LastExon	UTR3	18.3653	15.8422	23.1081	7.58271	7.76504	7.69252	2.48763	0.0329707	Dihydroorotase, mitochondrial, putative (AHRD V3.3 *** B9RVX9_RICCO)
Solyc02g078020.3	SL3.0ch02	43395136	43395401	LastExon	UTR3	UTR3	3.14894	3.53732	3.64037	2.3065	2.2563	2.00891	1.57137	0.00402054	Telomerase activating protein Est1, putative (AHRD V3.3 *** A0A061GFN7_THECC)
Solyc02g078400.3	SL3.0ch02	43659748	43660002	UTR3	UTR3	UTR3	2.23541	2.21669	2.249	1.43503	1.55359	1.40167	1.52635	0.00261351	allantoinase (AHRD V3.3 *** AT4G04955.1)
Solyc02g081390.3	SL3.0ch02	45929523	45929762	LastExon	Intergenic	Intergenic	2.41929	2.37127	2.36047	1.43072	1.69053	1.34479	1.6012	0.011368	Amine oxidase family protein (AHRD V3.3 *** B9H3J5_POPTR)
Solyc02g084660.3	SL3.0ch02	48389719	48390040	LastIntron	LastExon	UTR3	7.58803	7.72053	9.73259	6.02397	5.81626	4.73691	1.51058	0.0351177	Glutaredoxin (AHRD V3.3 *-* A0A124SH95_CYNCS)
Solyc02g084670.3	SL3.0ch02	48389719	48390040	UTR3	UTR3	Intergenic	7.58803	7.72053	9.73259	6.02397	5.81626	4.73691	1.51058	0.0351177	S-adenosyl-L-methionine-dependent methyltransferases superfamily protein (AHRD V3.3 *** AT3G51070.1)
Solyc02g085630.3	SL3.0ch02	49100620	49100876	Exon2	Exon2	Exon2	2.5623	2.18806	2.50206	1.71019	0.594357	0.770439	2.35852	0.0451152	Homeobox-leucine zipper family protein (AHRD V3.3 *** B9MXR7_POPTR)
Solyc02g088610.3	SL3.0ch02	51281683	51282017	LastExon	UTR3	UTR3	4.70646	5.41626	5.47486	3.41658	3.49485	3.0618	1.56395	0.00633569	LeHSP110/ClpB heat shock protein
Solyc02g091525.1	SL3.0ch02	53439068	53439566	Exon7	Intron8	Intron9	4.92105	4.25201	4.94116	2.95406	3.70587	2.64515	1.51683	0.0176182	5'-AMP-activated protein kinase subunit beta-1 (AHRD V3.3 *** A0A061EHR2_THECC)
Solyc02g091530.3	SL3.0ch02	53439068	53439566	Exon10	LastIntron	UTR3	4.92105	4.25201	4.94116	2.95406	3.70587	2.64515	1.51683	0.0176182	5'-AMP-activated protein kinase subunit beta-1 (AHRD V3.3 *** A0A061EHR2_THECC)
Solyc02g093060.3	SL3.0ch02	54642906	54643156	UTR3	UTR3	UTR3	3.33796	3.00587	2.99972	1.76905	2.49823	1.44692	1.63515	0.0472171	tRNA-dihydrouridine(16/17) synthase [NAD (P)(+)]-like protein (AHRD V3.3 *** A0A0B0NB62_GOSAR)
Solyc02g093550.3	SL3.0ch02	55022249	55022613	UTR3	Intergenic	Intergenic	6.51933	6.32316	6.2722	3.69226	4.39824	3.58126	1.63769	0.00667405	S-adenosyl-L-methionine-dependent methyltransferase (AHRD V3.3 *** I0YKX8_COCSC)
Solyc03g007150.3	SL3.0ch03	1740868	1741149	LastExon	LastExon	UTR3	10.9304	11.5481	12.4681	6.17423	7.6779	6.59673	1.70898	0.00157617	AT hook motif DNA-binding family protein (AHRD V3.3 *** A0A072VXL7_MEDTR)
Solyc03g007430.3	SL3.0ch03	1969767	1970117	UTR3	UTR3	UTR3	2.88851	2.59226	2.59635	1.85948	1.72555	1.70336	1.52733	0.00374533	Mitochondrial carrier protein, putative (AHRD V3.3 *** B9RIM4_RICCO)
Solyc03g007620.3	SL3.0ch03	2168276	2168625	LastExon	LastExon	UTR3	6.46926	5.92421	6.59451	4.2241	3.64255	3.90481	1.61305	0.00098685	Tic22-like family protein (AHRD V3.3 *** AT5G62650.1)
Solyc03g025200.3	SL3.0ch03	2696794	2697041	LastExon	LastExon	UTR3	9.26784	9.47158	10.7994	6.41006	6.8285	5.70034	1.55969	0.00547913	Multidrug resistance protein mdtK (AHRD V1 **-- MDTK_PHOLL)
Solyc03g032030.3	SL3.0ch03	4561179	4561466	UTR3	UTR3	UTR3	10.2023	10.4492	12.7545	5.14356	5.56137	5.44046	2.06907	0.0175341	Phosphate carrier protein, mitochondrial (AHRD V3.3 *** A0A0B2RN43_GLYSO)
Solyc03g078150.3	SL3.0ch03	51562008	51562341	LastExon	LastExon	UTR3	9.06405	9.42986	11.8463	6.45702	6.06719	5.33395	1.69896	0.0291485	Amino acid transporter family protein (AHRD V3.3 *** D7LGK0_ARALL)
Solyc03g078350.3	SL3.0ch03	52104546	52104896	UTR3	UTR3	UTR3	6.9011	6.69805	7.23276	4.89402	4.68928	3.85472	1.55022	0.00671428	UPF0235 protein C15orf40 like (AHRD V3.3 *** A0A0B2R9A9_GLYSO)
Solyc03g083200.3	SL3.0ch03	54473153	54473435	LastExon	Intergenic	Intergenic	18.5395	22.1418	24.5622	8.43059	9.8553	7.60045	2.52038	0.00984168	En/Spm-like transposon (AHRD V3.3 --* AT5G24275.4)
Solyc03g093430.3	SL3.0ch03	56146716	56147123	LastExon	LastExon	UTR3	6.36574	6.0214	6.26762	4.18834	4.3034	3.5668	1.54702	0.00422172	small G protein family protein / RhoGAP family protein (AHRD V3.3 *** AT5G61530.1)
Solyc03g097470.3	SL3.0ch03	61235533	61235847	UTR3	UTR3	Intergenic	3.89846	3.90275	4.0461	2.41478	2.48906	2.21021	1.66534	0.000332304	Ketoacyl-ACP synthase III (AHRD V3.3 *** M4QSR7_9ERIC)
Solyc03g110940.3	SL3.0ch03	63154394	63154765	LastIntron	LastExon	UTR3	15.3998	17.0033	17.3833	9.17499	9.63485	7.49354	1.89278	0.000943442	Protein kinase superfamily protein (AHRD V3.3 *** AT5G50330.1)
Solyc03g113100.3	SL3.0ch03	64862453	64862850	LastExon	UTR3	UTR3	3.51655	4.01623	3.50349	2.50039	2.59684	2.22593	1.50704	0.00570915	Ubiquitin-conjugating enzyme (AHRD V3.3 *** A0A072TRF9_MEDTR)
Solyc03g114760.3	SL3.0ch03	66146459	66146704	LastExon	LastExon	UTR3	6.48644	6.49885	5.99318	3.96816	3.67759	3.3483	1.72625	0.000415887	movement protein binding protein 2C (AHRD V3.3 *** AT5G08120.1)
Solyc03g114770.3	SL3.0ch03	66146459	66146704	UTR3	UTR3	UTR3	6.48644	6.49885	5.99318	3.96816	3.67759	3.3483	1.72625	0.000415887	breaking of asymmetry in the stomatal lineage (AHRD V3.3 *** AT5G60880.1)
Solyc03g118340.3	SL3.0ch03	68729786	68730182	UTR3	UTR3	UTR3	3.09863	2.53136	3.16249	1.90029	1.6277	1.79175	1.6528	0.0179311	Chloroplast ATP-dependent Clp protease chaperone protein (AHRD V3.3 *** A0A088FCE7_NICBE)
Solyc03g118350.3	SL3.0ch03	68737006	68737276	LastExon	UTR3	UTR3	2.86757	2.0801	2.35878	1.49939	1.53424	1.19993	1.72584	0.0308874	dual specificity protein phosphatase family protein (AHRD V3.3 *** AT5G23720.2)
Solyc03g118410.3	SL3.0ch03	68779197	68779396	LastExon	UTR3	UTR3	3.98206	3.82777	3.73193	2.23105	2.42248	1.9371	1.75124	0.00191631	Acyl carrier protein (AHRD V3.3 *** Q672Q9_SOLLC)
Solyc03g118755.1	SL3.0ch03	69070087	69070391	LastIntron	LastExon	UTR3	20.5848	17.5953	20.6752	13.8615	10.9011	12.7059	1.57079	0.0062581	Phosphoethanolamine N-methyltransferase (AHRD V3.3 *** Q9AXH3_SOLLC),Pfam:PF13489
Solyc03g120720.3	SL3.0ch03	70503485	70503910	LastExon	LastExon	UTR3	5.53037	5.88671	6.50083	3.85292	4.05531	3.31274	1.59682	0.0041304	Protein disulfide isomerase like protein (AHRD V3.3 *** C4T847_SOYBN)
Solyc03g121260.3	SL3.0ch03	70905649	70906044	LastIntron	UTR3	UTR3	15.012	17.015	18.9085	11.6913	11.3324	10.0487	1.54012	0.0204048	RNA methyltransferase family protein (AHRD V3.3 *** AT3G21300.1)
Solyc04g009470.3	SL3.0ch04	2879160	2879431	LastIntron	UTR3	UTR3	32.0771	38.6796	42.3648	12.4736	11.839	12.4668	3.07567	0.0133663	Mediator of RNA polymerase II transcription subunit 15a (AHRD V3.3 *-* A0A199VYD9_ANACO)
Solyc04g009550.3	SL3.0ch04	2960287	2960483	LastIntron	LastExon	UTR3	7.0196	6.53051	7.12378	4.45619	4.20097	4.19877	1.60812	0.00132744	TONNEAU 1B family protein (AHRD V3.3 *** B9HM06_POPTR)
Solyc04g009560.3	SL3.0ch04	2960287	2960483	UTR3	UTR3	UTR3	7.0196	6.53051	7.12378	4.45619	4.20097	4.19877	1.60812	0.00132744	TBC1 domain family member 8B (AHRD V3.3 *** W9RFJ9_9ROSA)
Solyc04g011767.1	SL3.0ch04	4220931	4221175	LastExon	LastExon	LastExon	2.56973	3.00486	2.6635	1.47311	2.22082	1.21069	1.67966	0.0499333	Pentatricopeptide repeat-containing protein At5g14770, mitochondrial (AHRD V3.3 --* PP381_ARATH)
Solyc04g014270.3	SL3.0ch04	4586017	4586447	LastExon	LastExon	UTR3	12.2117	11.5135	13.9717	8.50333	8.43465	7.67214	1.53176	0.0175792	ATP-dependent 6-phosphofructokinase (AHRD V3.3 *** K4BPT1_SOLLC)
Solyc04g014275.1	SL3.0ch04	4586017	4586447	Intergenic	Intergenic	Intron1	12.2117	11.5135	13.9717	8.50333	8.43465	7.67214	1.53176	0.0175792	BRCT domain-containing DNA repair protein (AHRD V3.3 --* AT4G03130.4)
Solyc04g051830.3	SL3.0ch04	51075160	51075613	LastIntron	UTR3	Intergenic	11.0006	12.1691	11.9875	7.79702	8.06465	7.19096	1.52508	0.00130671	Developmentally-regulated GTP-binding protein 1 (AHRD V3.3 *** A0A0B2PPN5_GLYSO)
Solyc04g063240.3	SL3.0ch04	55396781	55397012	UTR3	LastIntron	LastIntron	12.1984	14.6306	14.0987	9.03625	8.34844	9.15782	1.54197	0.0150661	STAY-GREEN-like protein (AHRD V3.3 *** AT1G44000.1)
Solyc04g064470.2	SL3.0ch04	55615575	55615899	LastExon	UTR3	Intergenic	5.36299	4.8944	6.13525	4.03505	3.77748	2.87173	1.53428	0.0196992	Squamosa promoter-binding-like protein (AHRD V3.3 *-* A0A072V7X4_MEDTR)
Solyc04g074850.3	SL3.0ch04	60852675	60852911	Exon5	Exon5	Intron5	1.65916	1.63648	1.62686	0.782117	0.884124	0.815959	1.98312	0.00053675	ripening regulated protein DDTFR18
Solyc04g076527.1	SL3.0ch04	61510860	61511331	Exon8	Intron8	Intron9	6.65696	7.99436	8.17915	5.09859	5.21405	4.82767	1.50793	0.0278024	GATA transcription factor, putative (AHRD V3.3 *** B9SN00_RICCO)
Solyc04g076530.3	SL3.0ch04	61510860	61511331	UTR3	UTR3	UTR3	6.65696	7.99436	8.17915	5.09859	5.21405	4.82767	1.50793	0.0278024	GATA transcription factor, putative (AHRD V3.3 *** B9SN00_RICCO)
Solyc04g077820.3	SL3.0ch04	62792704	62793016	LastIntron	UTR3	UTR3	11.3533	12.9739	12.6383	7.19478	8.42189	6.37205	1.68111	0.00333244	ZCW7 (AHRD V3.3 *** AT1G59600.1)
Solyc04g078620.3	SL3.0ch04	63398546	63398817	LastIntron	LastExon	Intergenic	6.72301	6.10414	7.40575	4.26114	5.02388	3.91527	1.53276	0.00972211	Ubiquitin-conjugating enzyme family protein (AHRD V3.3 *** A9PAA6_POPTR)
Solyc04g079810.2	SL3.0ch04	64206010	64206264	UTR3	UTR3	UTR3	9.08339	8.90347	10.2558	6.6211	6.38408	4.80715	1.58557	0.009829	F-box/FBD/LRR protein (AHRD V3.3 *-* A0A072VCC9_MEDTR)
Solyc04g081430.3	SL3.0ch04	65500163	65500490	LastIntron	LastExon	UTR3	12.9598	13.9165	15.7794	9.40028	10.1248	8.84138	1.50374	0.0163366	Mediator complex, subunit Med7 (AHRD V3.3 *** AT5G03500.6)
Solyc04g082700.3	SL3.0ch04	66374328	66374649	LastExon	UTR3	UTR3	4.10657	3.73954	4.04434	2.59025	2.52971	2.31324	1.59964	0.000696257	Tonoplast monosaccharide transporter 2
Solyc05g007140.3	SL3.0ch05	1733388	1733647	LastExon	UTR3	UTR3	1.90923	1.80452	1.76391	1.07793	1.24995	1.20068	1.55237	0.000721878	Protein kinase (AHRD V3.3 *** Q2HTW4_MEDTR)
Solyc05g008800.3	SL3.0ch05	3036127	3036446	LastExon	UTR3	UTR3	6.37642	5.5644	6.42415	3.97363	4.63849	3.33895	1.53668	0.0123208	Lipid phosphate phosphatase 2 family protein (AHRD V3.3 --* B9HWC6_POPTR)
Solyc05g012190.3	SL3.0ch05	5457064	5457479	LastExon	UTR3	Intergenic	10.1904	11.1152	12.2571	7.95565	7.15678	7.05157	1.51429	0.0118915	cell division cycle 48 (AHRD V3.3 *** AT3G09840.1)
Solyc05g012950.2	SL3.0ch05	6061059	6061284	Intron1	Exon2	Exon2	10.1948	11.9271	14.0539	5.93423	6.61766	6.17157	1.93211	0.0315145	Sulfotransferase (AHRD V3.3 *** K4BY19_SOLLC)
Solyc05g014050.3	SL3.0ch05	7616286	7616993	LastExon	UTR3	UTR3	6.06	5.91643	6.11619	4.0517	4.30745	3.47655	1.52865	0.0102552	Inner membrane protein (AHRD V3.3 *** S8C850_9LAMI)
Solyc05g050980.3	SL3.0ch05	62047119	62047433	LastExon	LastExon	UTR3	5.7456	4.87023	5.35243	3.56612	3.66124	3.14253	1.53987	0.00583613	3-phosphoshikimate 1-carboxyvinyltransferase (AHRD V3.3 *** K4C1D0_SOLLC)
Solyc05g051630.3	SL3.0ch05	62863296	62863576	LastIntron	Intergenic	Intergenic	12.0478	14.7829	14.8756	6.85154	8.79525	6.71615	1.86498	0.00643538	RFT1-like protein (AHRD V3.3 *** A0A103Y8L2_CYNCS)
Solyc05g051680.3	SL3.0ch05	62936939	62937184	LastIntron	LastExon	Intergenic	11.8873	14.1884	14.4989	7.33585	9.15309	8.17629	1.64501	0.00883083	Structural maintenance of chromosomes family protein (AHRD V3.3 *** D7M0L2_ARALL)
Solyc05g052620.3	SL3.0ch05	63673402	63673713	LastExon	UTR3	UTR3	2.88968	3.07843	2.66596	1.93914	1.97939	1.71105	1.5337	0.0034687	Coronatine-insensitive 1
Solyc05g053280.3	SL3.0ch05	64267848	64268097	LastExon	LastExon	UTR3	4.78311	3.63776	4.30585	2.81047	2.88299	2.77875	1.50217	0.0496087	Galactosyltransferase family protein (AHRD V3.3 *** AT3G06440.1)
Solyc05g056150.3	SL3.0ch05	66394343	66394571	LastExon	UTR3	UTR3	13.9923	16.0156	18.3668	9.23684	8.6965	8.26344	1.84659	0.0235594	1-(5-phosphoribosyl)-5-[(5-phosphoribosylamino)methylideneamino] imidazole-4-carboxamide isomerase (AHRD V3.3 *** W9RG35_9ROSA)
Solyc06g005380.3	SL3.0ch06	394758	395058	UTR3	UTR3	UTR3	9.82647	12.0016	12.2456	4.98021	4.93661	4.05317	2.43907	0.00646736	F-box family protein (AHRD V3.3 *** B9H9Z2_POPTR)
Solyc06g006100.3	SL3.0ch06	1136344	1136959	LastExon	LastExon	Intergenic	3.78946	3.97648	4.17342	2.53306	2.81298	2.24954	1.57188	0.00292603	Anthranilate synthase (AHRD V3.3 *** A0A0K9NQE9_ZOSMR)
Solyc06g008960.3	SL3.0ch06	2892422	2892744	LastExon	LastExon	UTR3	7.54008	7.28422	8.98738	4.69991	4.53771	3.57214	1.85887	0.00684762	Mediator of RNA polymerase II transcription subunit 33A (AHRD V3.3 *** G7IKE7_MEDTR)
Solyc06g019170.3	SL3.0ch06	17989983	17990524	LastIntron	UTR3	UTR3	12.5896	14.0653	14.6921	8.82659	8.80564	7.47339	1.64692	0.00304016	Delta-1-pyrroline-5-carboxylate synthetase (AHRD V3.3 *** G3M3X3_SOLTO)
Solyc06g036000.3	SL3.0ch06	25464314	25464609	LastIntron	LastExon	UTR3	26.7803	24.3581	25.3752	12.5681	12.3247	13.3691	1.99973	0.000738537	DNA-directed RNA polymerase III subunit RPC3 (AHRD V3.3 *** A0A0B0MV99_GOSAR)
Solyc06g048970.3	SL3.0ch06	32203318	32203560	LastIntron	UTR3	UTR3	12.3714	13.687	14.6035	9.219	7.13436	7.71016	1.68977	0.00353843	Cation-transporting ATPase 4 (AHRD V3.3 *** A0A0B0MJG4_GOSAR)
Solyc06g051080.3	SL3.0ch06	34290943	34291267	UTR3	UTR3	UTR3	10.2371	7.08398	8.73836	5.08294	4.31503	4.87124	1.82627	0.0426715	UDP-glucose pyrophosphorylase (AHRD V3.3 *** G7JBW8_MEDTR)
Solyc06g051410.3	SL3.0ch06	34848264	34848536	LastExon	UTR3	UTR3	4.64113	4.16681	5.11639	2.29366	2.85991	2.18831	1.89656	0.00392174	Phosphoribosylanthranilate isomerase (AHRD V3.3 *** F1BPW4_SOLPN)
Solyc06g053300.3	SL3.0ch06	36114622	36114993	LastIntron	UTR3	UTR3	8.95344	6.8016	8.64128	5.27426	5.46917	4.07433	1.64642	0.0218999	RNA-binding protein, putative (AHRD V3.3 *** B9T1D4_RICCO)
Solyc06g060670.3	SL3.0ch06	38813608	38813983	UTR3	UTR3	Intergenic	9.7193	10.8674	11.5682	6.38566	7.33339	5.56917	1.66707	0.00448789	Arginine N-methyltransferase family protein (AHRD V3.3 *** B9GYA9_POPTR)
Solyc06g065040.3	SL3.0ch06	40677046	40677371	UTR3	UTR3	UTR3	9.38128	7.07324	8.81928	5.05372	4.0293	4.68133	1.83618	0.0187369	bHLH transcription factor 086
Solyc06g065310.3	SL3.0ch06	40842771	40843051	LastExon	UTR3	Intergenic	13.3073	18.5792	18.3815	10.2122	12.0885	8.10422	1.65328	0.040228	Biotin/lipoate A/B protein ligase family (AHRD V3.3 *** AT3G29010.3)
Solyc06g065650.3	SL3.0ch06	41177457	41177907	LastExon	LastExon	UTR3	5.84548	7.09723	5.88988	3.76661	4.13302	3.555	1.6441	0.015785	Protein TIFY 8 (AHRD V3.3 *** A0A151RAB6_CAJCA)
Solyc06g069450.3	SL3.0ch06	43322024	43322397	LastExon	LastExon	UTR3	8.6768	9.785	10.7951	6.28382	7.05138	5.92033	1.5194	0.0161944	Haloacid dehalogenase-like hydrolase (HAD) superfamily protein (AHRD V3.3 *-* AT4G26190.5)
Solyc06g072750.3	SL3.0ch06	45011110	45011358	UTR3	UTR3	UTR3	13.718	11.6795	14.7135	6.9977	6.29155	6.21134	2.05691	0.0117099	SolycHsfA1e
Solyc06g082200.3	SL3.0ch06	48164577	48164886	Intron23	LastIntron	LastIntron	7.6377	6.95078	9.38672	1.72158	1.97922	1.50236	4.60782	0.0110027	Rab3 GTPase-activating protein catalytic subunit (AHRD V3.3 *** A0A072UXW3_MEDTR)
Solyc06g083870.3	SL3.0ch06	49224308	49224645	LastIntron	LastExon	UTR3	12.7607	9.98071	12.7159	8.16884	7.50388	6.34793	1.61018	0.0213642	structural maintenance of chromosomes 1
Solyc06g084470.3	SL3.0ch06	49608838	49609084	LastExon	Intergenic	Intergenic	6.4467	5.78539	6.71872	4.01325	4.15016	2.68457	1.74694	0.0128875	atypical CYS HIS rich thioredoxin 4 (AHRD V3.3 --* AT1G08570.4)
Solyc07g005890.3	SL3.0ch07	723840	724299	UTR3	UTR3	Intergenic	10.7198	10.1768	12.2255	7.57228	7.0751	7.17907	1.51752	0.020429	Dead box ATP-dependent RNA helicase, putative (AHRD V3.3 *** B9T3L1_RICCO)
Solyc07g007170.3	SL3.0ch07	1927326	1927592	LastIntron	UTR3	UTR3	2.03505	1.66525	1.85145	1.24222	1.26533	1.04957	1.56074	0.00975567	RING/U-box superfamily protein (AHRD V3.3 *** A0A061GN77_THECC)
Solyc07g045145.1	SL3.0ch07	58376890	58377163	LastExon	LastExon	UTR3	5.22788	4.18016	4.32295	3.02723	2.94582	2.42138	1.63573	0.015762	transmembrane protein (AHRD V3.3 *-* AT4G12680.1)
Solyc07g045290.3	SL3.0ch07	58528192	58528519	LastExon	LastExon	UTR3	1.89901	1.90481	1.63622	1.14759	1.17848	1.14953	1.56521	0.0168254	Long chain acyl-CoA synthetase (AHRD V3.3 *** Q5W6W7_ORYSJ)
Solyc07g047740.3	SL3.0ch07	59082010	59082225	UTR3	UTR3	UTR3	3.16254	3.07575	3.20946	1.81245	1.78544	1.76978	1.76012	0.000298411	TOMTPX2A peroxidase
Solyc07g047750.3	SL3.0ch07	59082010	59082225	Intergenic	UTR3	UTR3	3.16254	3.07575	3.20946	1.81245	1.78544	1.76978	1.76012	0.000298411	xyloglucan endotransglucosylase/hydrolase 10 (AHRD V3.3 --* AT2G14620.3)
Solyc07g049165.1	SL3.0ch07	59547086	59547446	LastExon	UTR3	Intergenic	8.0377	7.66618	8.88199	5.73638	5.20714	4.84277	1.55742	0.00376378	Ribonuclease 3 family protein (AHRD V3.3 *** B9GTV4_POPTR)
Solyc07g049310.3	SL3.0ch07	59695249	59695542	LastExon	LastExon	UTR3	6.83455	6.94562	8.25291	5.15241	4.85986	4.49974	1.51827	0.0194264	Major facilitator superfamily protein (AHRD V3.3 *** AT1G05030.1)
Solyc07g052453.1	SL3.0ch07	61098242	61098586	LastIntron	LastExon	Intergenic	7.90635	7.05479	8.71672	5.03252	4.26216	4.19743	1.75494	0.0074746	Syntaxin, putative (AHRD V3.3 *** B9SUS4_RICCO)
Solyc07g052470.3	SL3.0ch07	61098242	61098586	LastIntron	LastExon	UTR3	7.90635	7.05479	8.71672	5.03252	4.26216	4.19743	1.75494	0.0074746	Syntaxin, putative (AHRD V3.3 *** B9SUS4_RICCO)
Solyc07g052480.3	SL3.0ch07	61098242	61098586	UTR3	UTR3	UTR3	7.90635	7.05479	8.71672	5.03252	4.26216	4.19743	1.75494	0.0074746	isocitrate lyase LEU18678
Solyc07g053560.3	SL3.0ch07	62102484	62102734	LastExon	UTR3	UTR3	10.1238	11.1689	11.4811	5.91865	7.54731	5.73485	1.70689	0.00430272	phosphorelay protein (AHRD V3.3 *** AT5G44150.1)
Solyc07g054440.3	SL3.0ch07	62875862	62876145	LastExon	UTR3	UTR3	6.01174	6.2829	6.96617	4.24682	4.8775	3.3374	1.5456	0.0182697	Core-2/I-branching beta-1,6-N-acetylglucosaminyltransferase-like protein (AHRD V3.3 *** Q9LR71_ARATH)
Solyc07g054670.3	SL3.0ch07	63050555	63050799	LastIntron	LastExon	UTR3	10.594	9.23742	11.3126	6.98138	7.19172	6.41667	1.5126	0.0183521	External alternative NAD(P)H-ubiquinone oxidoreductase B2, mitochondrial (AHRD V3.3 *** NDB2_ARATH)
Solyc07g054680.3	SL3.0ch07	63050555	63050799	UTR3	Intergenic	Intergenic	10.594	9.23742	11.3126	6.98138	7.19172	6.41667	1.5126	0.0183521	Pentatricopeptide repeat-containing protein, putative (AHRD V3.3 *** B9T4W4_RICCO)
Solyc07g055260.3	SL3.0ch07	63479052	63479373	LastIntron	LastExon	UTR3	5.3152	5.23096	5.02995	3.19235	3.29344	2.8681	1.6652	0.000407222	DnaJ (AHRD V3.3 *** A0A126DIH0_ARAHY)
Solyc07g064630.3	SL3.0ch07	66823275	66823646	Intron4	Intron4	Intron4	7.93425	6.98137	9.38111	4.82236	5.09537	4.45221	1.6908	0.0344034	RNI-like superfamily protein (AHRD V3.3 *** AT4G26980.1)
Solyc08g005990.3	SL3.0ch08	755416	755781	UTR3	UTR3	UTR3	4.4645	5.06578	5.1284	2.98013	3.26249	2.82894	1.61589	0.00353436	CDP-diacylglycerol--inositol 3-phosphatidyltransferase (AHRD V3.3 *-* M1B6Y1_SOLTU)
Solyc08g006875.1	SL3.0ch08	1422567	1422957	Intergenic	Intergenic	Exon1	16.2569	15.4862	17.8736	10.356	9.56025	9.3158	1.69734	0.00418175	Subtilisin-like protease SBT3.13 (AHRD V3.3 --* SBT3D_ARATH)
Solyc08g006880.3	SL3.0ch08	1422567	1422957	LastIntron	UTR3	UTR3	16.2569	15.4862	17.8736	10.356	9.56025	9.3158	1.69734	0.00418175	Multidrug resistance protein ABC transporter family protein (AHRD V3.3 *** G7IP56_MEDTR)
Solyc08g021870.2	SL3.0ch08	34345823	34346085	Intergenic	UTR5	UTR5	11.5207	8.73772	11.6407	6.31158	5.81308	5.82972	1.77667	0.0358984	Ankyrin repeat-containing protein (AHRD V3.3 *-* A0A124SAK7_CYNCS)
Solyc08g066020.2	SL3.0ch08	54530608	54531106	UTR3	UTR3	UTR3	9.69901	9.48807	11.7736	6.28115	6.6469	5.97273	1.63807	0.0249653	Long chain base biosynthesis protein 1 (AHRD V3.3 *-* LCB1_ARATH)
Solyc08g066700.3	SL3.0ch08	55591937	55592232	UTR3	UTR3	UTR3	2.23589	2.2763	2.32174	0.783166	0.910345	0.737341	2.81133	0.000176891	Exosome complex exonuclease RRP46 homolog (AHRD V3.3 *** EXOS5_ARATH)
Solyc08g076430.3	SL3.0ch08	60566633	60566979	LastIntron	LastExon	Intergenic	15.7849	14.3703	18.4738	11.5823	10.3222	8.98759	1.57416	0.0201916	Survival motor neuron (AHRD V3.3 *** A0A0B0NST2_GOSAR)
Solyc08g076510.3	SL3.0ch08	60621041	60621333	LastExon	Intergenic	Intergenic	6.8232	6.89326	7.73564	4.72582	4.951	3.98426	1.57031	0.00329092	envelope glycoprotein (AHRD V3.3 *** AT1G32260.1)
Solyc08g077970.2	SL3.0ch08	61985067	61985319	LastExon	UTR3	UTR3	5.82114	6.80533	6.55998	3.73391	4.1605	3.43946	1.69284	0.00288542	transcription factor IIIB (AHRD V3.3 *** AT4G17010.1)
Solyc08g079820.3	SL3.0ch08	63395793	63396559	Exon7	Exon7	UTR3	5.06532	4.9358	5.02334	3.245	3.58457	2.62295	1.58947	0.0206292	Nudix hydrolase (AHRD V3.3 *** A0A061G560_THECC)
Solyc08g079830.3	SL3.0ch08	63395793	63396559	LastExon	UTR3	UTR3	5.06532	4.9358	5.02334	3.245	3.58457	2.62295	1.58947	0.0206292	copper/zinc superoxide dismutase copper chaperone precursor
Solyc08g081010.3	SL3.0ch08	64262108	64262525	LastIntron	UTR3	Intergenic	6.00014	5.36776	5.92781	2.37933	2.69328	2.09038	2.4146	0.000243746	gamma-glutamylcysteine synthetase 1
Solyc08g082080.3	SL3.0ch08	65103403	65103925	LastExon	LastExon	Intergenic	4.17	4.21997	4.2921	2.7261	2.606	2.07729	1.71162	0.0107464	Amino acid transporter family protein (AHRD V3.3 *** B9GL79_POPTR)
Solyc08g082560.3	SL3.0ch08	65432890	65433206	LastExon	Intergenic	Intergenic	8.78108	7.92327	9.26256	4.98355	4.86903	4.21352	1.84606	0.00220015	F-box SKIP8-like protein (AHRD V3.3 *** A0A0B0PWH2_GOSAR)
Solyc09g005230.3	SL3.0ch09	174959	175312	UTR3	UTR3	UTR3	8.37735	8.94469	10.2869	5.06215	6.49831	4.98951	1.66821	0.00835162	UPF0420 C16orf58-like protein (AHRD V3.3 *** G7KS93_MEDTR)
Solyc09g007270.3	SL3.0ch09	868946	869243	LastIntron	LastExon	UTR3	4.49337	4.47267	4.4155	2.95068	3.23465	2.52137	1.53693	0.0162845	Ascorbate peroxidase (AHRD V3.3 *** B9VRH6_CITMA)
Solyc09g009090.3	SL3.0ch09	2441927	2442193	Intron15	Exon16	LastIntron	3.34997	2.94089	3.26152	1.715	1.96926	1.641	1.79379	0.00111093	CTR1-like protein kinase-3
Solyc09g031705.1	SL3.0ch09	28334334	28334753	LastExon	LastExon	UTR3	11.8698	13.0096	13.6298	8.42275	7.64436	7.29996	1.64801	0.00227831	Phosphate transporter (AHRD V3.3 *-* A0A0A1G3W1_MANES)
Solyc09g055260.3	SL3.0ch09	38591810	38592136	Exon16	UTR3	LastIntron	3.25924	3.25242	3.46401	2.01717	2.53477	2.00998	1.52024	0.0130087	E3 ubiquitin-protein ligase listerin-like protein (AHRD V3.3 *** A0A072UEK1_MEDTR)
Solyc09g055260.3	SL3.0ch09	38591104	38591486	LastIntron	UTR3	UTR3	16.3764	17.4032	19.4965	11.8672	11.9799	10.4903	1.55155	0.00875206	E3 ubiquitin-protein ligase listerin-like protein (AHRD V3.3 *** A0A072UEK1_MEDTR)
Solyc09g064320.3	SL3.0ch09	61724723	61725016	LastExon	LastExon	UTR3	12.1778	17.4361	18.569	7.68161	7.67118	6.53773	2.20109	0.0426128	Transducin/WD40 repeat protein (AHRD V3.3 *** A0A072VM11_MEDTR)
Solyc09g064330.2	SL3.0ch09	61724723	61725016	UTR3	UTR3	UTR3	12.1778	17.4361	18.569	7.68161	7.67118	6.53773	2.20109	0.0426128	RmlC-like cupins superfamily protein (AHRD V3.3 *** A0A061DW96_THECC)
Solyc09g075790.3	SL3.0ch09	67839423	67839683	LastExon	Intergenic	Intergenic	19.7095	19.1456	21.5492	12.5414	11.1799	14.1045	1.59691	0.00271214	Long-Chain Acyl-CoA Synthetase (AHRD V3.3 *** A0A0R5QM74_SALMI)
Solyc10g006840.3	SL3.0ch10	1274839	1275162	Intergenic	UTR5	Intergenic	10.1037	10.8674	11.6291	7.01901	8.48847	6.19392	1.50222	0.0148231	P-loop containing nucleoside triphosphate hydrolases superfamily protein (AHRD V3.3 --* AT1G72660.3)
Solyc10g007110.3	SL3.0ch10	1500512	1500759	LastExon	UTR3	Intergenic	3.42071	3.06981	3.07846	1.75488	2.1975	1.58862	1.72694	0.00574174	Tyrosine aminotransferase (AHRD V3.3 *** E2JFA7_PERFR)
Solyc10g008990.3	SL3.0ch10	3008145	3008428	Intron1	Intron1	Intron1	2.71075	2.23827	3.03839	1.43767	1.76205	1.66839	1.64076	0.0320644	UPF0533 protein C5orf44 like (AHRD V3.3 *-* A0A0B2PQR4_GLYSO)
Solyc10g011960.2	SL3.0ch10	4247033	4247297	Exon3	Exon3	LastIntron	4.28791	4.90041	4.42656	2.77906	3.62558	2.47641	1.53303	0.0261102	Heavy metal transport/detoxification superfamily protein (AHRD V3.3 *-* AT1G01490.2)
Solyc10g044780.2	SL3.0ch10	27699836	27700135	LastExon	UTR3	UTR3	17.3794	15.5524	17.726	10.48	9.06294	8.47483	1.80806	0.0011794	Phosphatidylinositol-4-phosphate 5-kinase 5-like protein (AHRD V3.3 *** A0A0B0PLQ6_GOSAR)
Solyc10g054900.2	SL3.0ch10	56006248	56006533	LastExon	LastExon	LastExon	1.84292	1.96369	1.73172	0.895813	0.560394	0.864778	2.3862	0.00220202	cell cycle checkpoint control protein family (AHRD V3.3 *** AT3G05480.1)
Solyc10g061960.2	SL3.0ch10	23897271	23897645	UTR3	UTR3	UTR3	5.71557	5.44766	5.35919	3.58	4.20805	3.18447	1.5058	0.0161401	Proline-rich protein (AHRD V3.3 *** Q9M6T7_NICGL)
Solyc10g076920.2	SL3.0ch10	59989616	59989918	UTR3	UTR3	UTR3	9.1985	11.0644	11.3523	7.38262	6.88841	5.80384	1.57487	0.012441	BZIP transcription factor (AHRD V3.3 *** A0A0K2JKR5_GOSHI)
Solyc10g078430.2	SL3.0ch10	60386930	60387313	LastExon	LastExon	UTR3	12.3168	14.2754	16.5459	7.94592	7.85983	7.39669	1.85921	0.0301569	Transcription factor DP (AHRD V3.3 *** AT5G03415.1)
Solyc10g080770.2	SL3.0ch10	62104246	62104545	LastExon	LastExon	UTR3	3.50217	2.72884	3.44352	2.06862	1.74247	1.92078	1.68785	0.0227708	NPR1-interactor protein 1
Solyc10g081250.2	SL3.0ch10	62500332	62500682	UTR3	UTR3	UTR3	15.4232	16.6959	19.0671	9.44221	8.31071	8.98704	1.91422	0.0111752	DNA polymerase (AHRD V3.3 *** K4D312_SOLLC)
Solyc10g081260.2	SL3.0ch10	62516208	62516484	LastIntron	LastExon	Intergenic	7.72823	5.51286	6.71872	4.28437	4.09659	3.5481	1.67321	0.0409567	Protein DETOXIFICATION (AHRD V3.3 *** K4D313_SOLLC)
Solyc10g083490.2	SL3.0ch10	63400795	63401472	Exon8	LastExon	Intergenic	8.69776	9.42631	10.4916	6.21448	6.85658	5.55493	1.53633	0.00849826	Cell division protein ftsZ, putative (AHRD V3.3 *** B9SRX2_RICCO)
Solyc10g083640.2	SL3.0ch10	63555023	63555412	UTR3	UTR3	Intergenic	4.72067	4.23252	5.07914	2.99764	2.78289	2.63604	1.66722	0.00824107	Zinc finger transcription factor 64
Solyc10g083720.2	SL3.0ch10	63616346	63616775	LastExon	LastExon	UTR3	5.044	6.17225	5.62558	3.20361	3.88373	2.74771	1.71243	0.00730379	Pyruvate kinase family protein (AHRD V3.3 *** AT3G52990.1)
Solyc10g083740.2	SL3.0ch10	63628091	63628328	Intron2	Exon3	LastIntron	2.56478	2.20162	2.22898	1.37454	1.53772	1.56905	1.56101	0.00783737	60S ribosomal protein L24 (AHRD V3.3 *** RL24_PRUAV)
Solyc10g084650.2	SL3.0ch10	64208312	64208765	UTR3	UTR3	UTR3	11.9406	12.151	14.4215	7.49686	8.07884	6.82757	1.71908	0.0105848	Acyl-CoA N-acyltransferase with RING/FYVE/PHD-type zinc finger domain-containing protein (AHRD V3.3 *** AT2G37520.1)
Solyc10g085570.3	SL3.0ch10	64821845	64822103	LastIntron	UTR3	UTR3	16.9289	19.4984	18.3668	12.4646	11.9818	10.4514	1.57013	0.00265556	CTR1-like protein kinase-4
Solyc11g006930.2	SL3.0ch11	1445325	1445609	UTR3	UTR3	UTR3	9.51227	12.145	11.7041	5.31606	6.22568	5.7282	1.93176	0.0151519	4'-phosphopantetheinyl transferase family protein (AHRD V3.3 *** A0A072VJ15_MEDTR)
Solyc11g008730.2	SL3.0ch11	2911677	2912095	LastExon	LastExon	UTR3	10.9511	10.8972	13.0713	7.63565	8.27732	6.24491	1.57594	0.0111363	U11/U12 small nuclear ribonucleoprotein 25 kDa (AHRD V3.3 *** A0A0B0PJE8_GOSAR)
Solyc11g008740.2	SL3.0ch11	2911677	2912095	UTR3	UTR3	UTR3	10.9511	10.8972	13.0713	7.63565	8.27732	6.24491	1.57594	0.0111363	Sister chromatid cohesion 1 protein 3 (AHRD V3.3 *** W9SSS4_9ROSA)
Solyc11g012920.2	SL3.0ch11	5707171	5707550	LastIntron	UTR3	UTR3	23.7494	23.8497	28.1871	17.3884	14.1478	15.8917	1.59792	0.00870477	translation initiation factor (AHRD V3.3 *** AT1G44780.2)
Solyc11g013110.2	SL3.0ch11	5965778	5966094	LastExon	LastExon	UTR3	2.19952	2.02887	2.05783	1.20572	1.22338	1.14844	1.75714	0.000960289	Flavonol synthase (AHRD V3.3 *** C0LUV3_SOLTU)
Solyc11g013830.2	SL3.0ch11	7258903	7259223	LastExon	LastExon	UTR3	3.23857	2.63112	2.65838	2.05961	1.82325	1.50739	1.58213	0.0161201	1-phosphatidylinositol-3-phosphate 5-kinase (AHRD V3.3 *** W9QXB1_9ROSA)
Solyc11g018747.1	SL3.0ch11	9359662	9360129	Exon11	Exon11	UTR3	16.6982	15.4718	17.5649	11.5297	10.5914	9.56446	1.56964	0.00196637	Inner membrane ALBINO3-like protein (AHRD V3.3 *** Q5SNL9_ORYSJ)
Solyc11g018750.2	SL3.0ch11	9359662	9360129	UTR3	UTR3	UTR3	16.6982	15.4718	17.5649	11.5297	10.5914	9.56446	1.56964	0.00196637	transmembrane protein, putative (DUF707) (AHRD V3.3 --* AT1G13000.5)
Solyc11g064850.2	SL3.0ch11	50389838	50390346	LastIntron	LastExon	UTR3	6.45571	6.07246	7.19817	4.57522	4.36374	4.07706	1.51554	0.0109992	Hyp O-arabinosyltransferase-like protein (AHRD V3.3 *** AT5G13500.3)
Solyc11g066340.2	SL3.0ch11	52386839	52387212	UTR3	UTR3	UTR3	11.9777	12.3126	13.9147	9.52006	7.94953	7.18158	1.54983	0.00812232	actin protein 2/3 complex subunit-like protein (AHRD V3.3 *** AT2G28130.1)
Solyc11g066620.2	SL3.0ch11	52692869	52693183	LastExon	LastExon	UTR3	2.70203	2.35513	2.60944	1.34361	1.2336	1.18984	2.03517	0.00211084	Eukaryotic aspartyl protease family protein (AHRD V3.3 *** AT5G22850.1)
Solyc11g066630.2	SL3.0ch11	52692869	52693183	UTR3	UTR3	UTR3	2.70203	2.35513	2.60944	1.34361	1.2336	1.18984	2.03517	0.00211084	AP2/B3-like transcriptional factor family protein (AHRD V3.3 --* AT2G24681.1)
Solyc11g067060.3	SL3.0ch11	53102256	53102618	LastIntron	UTR3	UTR3	8.42835	8.90073	9.82307	5.76049	6.64275	5.31102	1.53279	0.00517179	low molecular weight protein-tyrosine phosphatase
Solyc11g068980.2	SL3.0ch11	53852331	53852651	LastExon	UTR3	Intergenic	8.64049	11.6016	10.7555	6.59433	6.83319	5.5848	1.63039	0.0302894	Mitochondrial import inner membrane translocase subunit TIM22 (AHRD V3.3 *** A0A0B2PVQ5_GLYSO)
Solyc11g069790.2	SL3.0ch11	54713205	54713544	LastExon	UTR3	UTR3	4.22904	4.06211	4.79216	2.38105	2.51754	2.0093	1.89396	0.00248431	Chaperonin 60 alpha subunit (AHRD V3.3 *** Q9ZTV1_CANLI)
Solyc11g070120.2	SL3.0ch11	54947709	54947975	LastIntron	UTR3	UTR3	16.8026	15.3701	17.3351	9.52887	10.2315	9.74792	1.67776	0.00379436	Vacuolar protein sorting-associated protein 32 homolog 1 (AHRD V3.3 *** VP321_ARATH)
Solyc11g071250.2	SL3.0ch11	55075992	55076343	LastExon	UTR3	UTR3	8.13225	8.67757	9.69857	4.98691	5.43627	5.18594	1.69826	0.0109056	Protein EMBRYONIC FLOWER 1-like protein (AHRD V3.3 *** A0A0B0NHJ8_GOSAR)
Solyc11g071950.2	SL3.0ch11	55568247	55568541	UTR3	UTR3	UTR3	8.32337	6.59433	7.97073	4.85977	5.14864	4.95625	1.5295	0.0347968	ubiquitin carboxyl-terminal hydrolase (AHRD V3.3 *** AT5G22040.3)
Solyc11g071960.2	SL3.0ch11	55568247	55568541	UTR3	UTR3	UTR3	8.32337	6.59433	7.97073	4.85977	5.14864	4.95625	1.5295	0.0347968	Sulfhydryl oxidase (AHRD V3.3 *** K4DAQ3_SOLLC)
Solyc12g006250.2	SL3.0ch12	771931	772241	LastIntron	LastExon	UTR3	8.5095	8.66805	9.79856	5.93305	4.99899	5.72751	1.61926	0.00338011	Protein transport protein SFT2, putative (AHRD V3.3 *** B9SF26_RICCO)
Solyc12g008340.2	SL3.0ch12	1745996	1746277	LastExon	Intergenic	Intergenic	4.37989	4.12757	4.39389	3.1781	2.43687	2.24253	1.64192	0.0202377	Exostosin family protein (AHRD V3.3 *** AT5G19670.2)
Solyc12g008790.2	SL3.0ch12	2140143	2140431	UTR3	UTR3	UTR3	5.76331	5.72501	6.73388	3.07049	3.88668	2.87225	1.85384	0.00353911	Acyl--UDP-N-acetylglucosamine O-acyltransferase (AHRD V3.3 *** D7MCK7_ARALL)
Solyc12g011160.2	SL3.0ch12	4012644	4012949	LastIntron	LastExon	UTR3	6.29162	5.82515	5.98589	3.39219	3.1218	3.08703	1.88549	0.000147485	3-hydroxyisobutyryl-CoA hydrolase-like protein (AHRD V3.3 *** A0A072V5U1_MEDTR)
Solyc12g013840.2	SL3.0ch12	4638321	4638970	UTR3	LastIntron	UTR3	8.26882	8.96335	9.35116	5.83174	6.13476	4.98401	1.56829	0.00242028	SPA1-related 3 (AHRD V3.3 *** AT3G15354.3)
Solyc12g013850.2	SL3.0ch12	4638321	4638970	UTR3	UTR3	UTR3	8.26882	8.96335	9.35116	5.83174	6.13476	4.98401	1.56829	0.00242028	Core-2/I-branching beta-1,6-N-acetylglucosaminyltransferase family protein (AHRD V3.3 *** F4JIW2_ARATH)
Solyc12g014280.2	SL3.0ch12	5099124	5099382	LastExon	LastExon	UTR3	7.37324	7.29698	7.61098	5.22556	5.01241	4.3854	1.52367	0.00469401	CRS1/YhbY (CRM) domain protein (AHRD V3.3 *** A0A072UMR2_MEDTR)
Solyc12g017250.2	SL3.0ch12	6438623	6438894	Intron2	Intron3	Exon4	2.63101	2.19638	2.46328	1.34915	1.55099	1.19235	1.78148	0.00326496	Photosystem II 10 kDa polypeptide family protein (AHRD V3.3 *** A9PH94_POPTR)
Solyc12g017250.2	SL3.0ch12	6440878	6441122	LastIntron	LastExon	UTR3	3.92345	3.39295	3.83687	2.05012	2.63929	1.71999	1.74014	0.0119818	Photosystem II 10 kDa polypeptide family protein (AHRD V3.3 *** A9PH94_POPTR)
Solyc12g019110.2	SL3.0ch12	9150591	9150874	UTR3	UTR3	UTR3	11.4664	14.5117	14.25	8.12779	8.10955	7.60172	1.68749	0.0272978	Valyl-tRNA synthetase (AHRD V3.3 *** A0A151SWL9_CAJCA)
Solyc12g027770.2	SL3.0ch12	26659254	26659819	LastExon	UTR3	UTR3	17.4436	19.4034	21.8623	13.3775	13.3187	12.2453	1.50763	0.0279631	Rhodanese-like domain-containing protein (AHRD V3.3 *** A0A118K4F8_CYNCS)
Solyc12g044340.2	SL3.0ch12	60204041	60204373	UTR3	UTR3	Intergenic	10.9319	12.457	12.0411	7.94287	8.94801	6.29084	1.52836	0.0169431	Coiled-coil domain-containing protein 111 like (AHRD V3.3 *** A0A0B2SDU5_GLYSO)
Solyc12g056530.2	SL3.0ch12	63431967	63432415	LastIntron	UTR3	UTR3	9.48763	8.79342	9.63919	6.45414	6.08708	5.36861	1.55893	0.00148378	Fructose-1,6-bisphosphatase (AHRD V3.3 *** A0A068JD95_TOBAC)
Solyc12g056940.2	SL3.0ch12	63955573	63956007	LastExon	UTR3	UTR3	3.43662	2.97148	3.35859	1.8503	2.04324	1.67233	1.75475	0.00199484	Acetyl-CoA carboxylase family protein (AHRD V3.3 *** B9GUK0_POPTR)
Solyc12g070113.1	SL3.0ch12	29624854	29625169	LastIntron	Intergenic	Intergenic	4.78067	4.85517	5.04152	1.94471	2.35862	1.5057	2.52665	0.00380734	CTP synthase (AHRD V3.3 *-* K4BA89_SOLLC)
Solyc12g076320.2	SL3.0ch12	22274083	22274482	LastExon	LastExon	UTR3	14.0638	15.8252	18.0588	9.669	10.3623	10.037	1.59463	0.032433	Pachytene checkpoint protein 2 like (AHRD V3.3 *-* A0A0B2QCF2_GLYSO)
Solyc12g089220.2	SL3.0ch12	65307722	65308113	LastIntron	Intergenic	Intergenic	14.2156	16.2999	18.9049	10.7949	10.7997	8.74388	1.62897	0.0255664	Bifunctional nuclease 1 (AHRD V3.3 *** BBD1_ARATH)
Solyc12g096040.2	SL3.0ch12	66092863	66093340	LastExon	Intergenic	Intergenic	7.51185	8.59359	9.18727	5.95267	5.87746	5.03092	1.50007	0.0130669	PHD finger alfin-like protein (AHRD V3.3 *** A0A072V846_MEDTR)
Solyc12g096810.2	SL3.0ch12	66562415	66562678	LastIntron	LastExon	UTR3	18.1445	17.5656	24.0044	12.2627	9.96674	10.5733	1.82041	0.0377985	LETM1 and EF-hand domain-containing protein 1 (AHRD V3.3 *** A0A061EI71_THECC)
Solyc12g098710.2	SL3.0ch12	67110114	67110397	LastIntron	LastIntron	LastExon	2.03734	2.38301	2.2395	0.615718	0.583744	0.66428	3.57338	0.00263226	15-cis-zeta-carotene isomerase (AHRD V3.3 *** A0A0A7DVN8_LYCBA)
Solyc12g098810.2	SL3.0ch12	67170842	67171113	LastExon	LastExon	UTR3	3.72299	3.52453	3.51706	1.99522	2.19913	1.64804	1.8425	0.00396556	Chitinase family protein (AHRD V3.3 *** AT1G05850.2)
Solyc12g099280.2	SL3.0ch12	67465004	67465219	Exon8	Exon8	UTR3	5.77355	5.82492	6.27008	3.80642	3.92276	2.5913	1.73137	0.0177602	Pre-mRNA polyadenylation factor Fip1 (AHRD V3.3 *-* A0A103XT69_CYNCS)
Solyc12g099810.2	SL3.0ch12	67779471	67779859	UTR3	Intergenic	Intergenic	13.2476	11.2384	13.5329	4.60619	5.07651	4.14394	2.74969	0.00369877	Crt (AHRD V3.3 *** A0A0B0NUB3_GOSAR)

## Sheet: Table S7
Table S7. Transcripts with lower m6A peak enrichment in wild-type fruits at 39 DPA compared to 42 DPA. WT, wild-type; DPA, days post-anthesis.
Overlapped gene ID	Chromosome	Peak Start	Peak End	Overlap_Begin	Overlap_Center	Overlap_End	m6A enrichment in peaks						Fold change in m6A enrichment (39DPA/42DPA)	P value	Description
							WT-39DPA Replicate 1	WT-39DPA Replicate 2	WT-39DPA Replicate 3	WT-42DPA Replicate1	WT-42DPA Replicate 2	WT-42DPA Replicate 3
Solyc01g011350.3	SL3.0ch01	8637341	8637780	UTR3	UTR3	UTR3	2.80924	2.93933	3.04431	4.95497	4.69104	4.48015	0.622454	0.00154906	protein phosphatase 2A catalytic subunit 2
Solyc01g011340.3	SL3.0ch01	8637341	8637780	UTR3	UTR3	UTR3	2.80924	2.93933	3.04431	4.95497	4.69104	4.48015	0.622454	0.00154906	ZZ-type zinc finger-containing protein 3, putative isoform 1 (AHRD V3.3 *** A0A061EGG8_THECC)
Solyc01g056770.1	SL3.0ch01	56477245	56477917	LastExon	Intergenic	Intergenic	10.578	12.1589	14.3236	19.0378	21.8106	17.5792	0.634299	0.0129348	Nucleotide/sugar transporter family protein (AHRD V3.3 --* AT5G55950.2)
Solyc01g080705.1	SL3.0ch01	79809887	79810231	LastExon	LastExon	UTR3	6.44755	8.94757	9.13991	15.0769	16.6859	14.3704	0.53183	0.00342971	Inosine-uridine preferring nucleoside hydrolase-related family protein (AHRD V3.3 *-* B9P577_POPTR)
Solyc01g081450.3	SL3.0ch01	80513272	80513537	LastExon	UTR3	UTR3	0.990672	0.855351	0.896578	1.78661	1.7864	1.47433	0.543375	0.010006	Glycine-rich protein A3 (AHRD V3.3 *** A0A1D1Y762_9ARAE)
Solyc01g094790.3	SL3.0ch01	86073628	86074013	Exon8	LastExon	UTR3	1.4941	1.22491	1.25722	2.1373	2.07329	1.97964	0.64234	0.00425404	Cysteine synthase (AHRD V3.3 *** K4AZL9_SOLLC)
Solyc01g097520.3	SL3.0ch01	88221847	88222070	LastExon	LastExon	UTR3	0.91883	0.802548	0.826656	2.09681	1.95966	1.76042	0.43804	0.00384304	annexin 5
Solyc01g099290.3	SL3.0ch01	89446969	89447285	UTR3	UTR3	UTR3	7.38581	7.59356	8.89079	15.2848	17.2438	12.8636	0.525865	0.0196039	cullin 1 (AHRD V3.3 *-* AT4G02570.4)
Solyc01g100650.3	SL3.0ch01	90515709	90515961	LastExon	LastExon	Intergenic	5.91139	5.50299	6.39682	9.6595	8.45759	9.7113	0.640037	0.00423363	haloacid dehalogenase-like hydrolase family protein (AHRD V3.3 *** AT1G56500.1)
Solyc01g109440.2	SL3.0ch01	96306411	96306833	LastExon	LastExon	Intergenic	7.1825	8.46998	8.38341	13.3395	13.874	10.4717	0.637808	0.0360974	LOW QUALITY:G-box-binding factor 1 (AHRD V3.3 --* W9RBL5_9ROSA)
Solyc01g109450.3	SL3.0ch01	96306411	96306833	Exon9	LastIntron	UTR3	7.1825	8.46998	8.38341	13.3395	13.874	10.4717	0.637808	0.0360974	PfkB family carbohydrate kinase (AHRD V3.3 *** A0A072UMB6_MEDTR)
Solyc01g111440.3	SL3.0ch01	97596545	97596813	LastExon	LastExon	UTR3	1.26278	1.07534	1.19113	2.24659	2.14414	1.9209	0.559168	0.0028848	Senescence/dehydration-associated protein-like protein (AHRD V3.3 *** AT2G17840.1)
Solyc02g063360.3	SL3.0ch02	35971802	35972068	LastExon	UTR3	UTR3	1.07242	1.0282	0.985115	1.62079	1.75315	1.35602	0.65238	0.0373955	Calcium-dependent lipid-binding domain-containing protein (AHRD V3.3 *** F4K8L6_ARATH)
Solyc02g070890.3	SL3.0ch02	41060497	41060759	LastExon	LastExon	UTR3	1.41761	1.22466	1.5404	2.42325	2.17931	2.05202	0.628541	0.00484143	Ontology_term=GO:0004675
Solyc02g070920.3	SL3.0ch02	41060497	41060759	Intron3	Intron3	Intron3	1.41761	1.22466	1.5404	2.42325	2.17931	2.05202	0.628541	0.00484143	Serine/threonine-protein kinase SAPK7 (AHRD V3.3 --* SAPK7_ORYSJ)
Solyc02g071240.3	SL3.0ch02	41289424	41289671	UTR3	UTR3	UTR3	8.90152	11.529	11.673	20.3274	18.0882	17.4037	0.575133	0.00331157	Pre-mRNA-processing factor 39, putative (AHRD V3.3 *-* A0A072TV09_MEDTR)
Solyc02g080780.3	SL3.0ch02	45465082	45465320	LastIntron	UTR3	UTR3	8.98969	9.82528	11.9864	18.1671	16.4382	13.2484	0.643656	0.0374399	Orotidine 5'-phosphate decarboxylase (AHRD V3.3 *** A0A0B0MNV8_GOSAR)
Solyc02g081030.3	SL3.0ch02	45639405	45639730	UTR3	UTR3	UTR3	2.13623	1.92423	2.07586	3.91067	4.07734	3.44202	0.536859	0.0066482	ERD (early-responsive to dehydration stress) family protein (AHRD V3.3 *** AT4G22120.6)
Solyc02g088630.3	SL3.0ch02	51293622	51294006	UTR3	UTR3	UTR3	3.67054	2.9382	4.09505	6.70354	6.34123	5.42133	0.579645	0.00737921	Hexosyltransferase (AHRD V3.3 *** K4BC18_SOLLC)
Solyc03g005170.3	SL3.0ch03	111796	112348	LastExon	Intergenic	Intergenic	3.32733	3.01586	3.25268	4.99361	5.69677	4.52902	0.630503	0.0245025	Acyl-CoA N-acyltransferase with RING/FYVE/PHD-type zinc finger protein, putative (AHRD V3.3 *** A0A061EMV6_THECC)
Solyc03g007230.3	SL3.0ch03	1794589	1794907	Exon3	Exon3	UTR3	3.2059	2.43324	3.19811	4.61257	4.35023	4.34219	0.664206	0.0193335	Protein phosphatase 2c, putative (AHRD V3.3 *** B9RIK1_RICCO)
Solyc03g007240.3	SL3.0ch03	1794589	1794907	UTR3	UTR3	UTR3	3.2059	2.43324	3.19811	4.61257	4.35023	4.34219	0.664206	0.0193335	spermine synthase
Solyc03g026290.3	SL3.0ch03	3745749	3746126	LastExon	UTR3	UTR3	5.59621	6.61162	7.04935	10.2075	10.3308	8.77148	0.657022	0.00752951	Post-GPI attachment-like factor-protein (AHRD V3.3 *** A0A072UAB4_MEDTR)
Solyc03g059260.3	SL3.0ch03	30407122	30407454	LastExon	UTR3	UTR3	1.58329	1.45772	1.4094	3.40065	3.77188	2.82883	0.444981	0.0184084	Carboxyl-terminal-processing protease (AHRD V3.3 *** A0A151QQ57_CAJCA)
Solyc03g081320.3	SL3.0ch03	53623658	53624086	LastExon	LastExon	UTR3	3.59525	3.46721	3.81227	5.9144	6.38192	5.46185	0.612378	0.00688036	StAR-related lipid transfer protein (AHRD V3.3 *** T2DNH6_PHAVU)
Solyc03g093510.2	SL3.0ch03	56291851	56292180	UTR3	UTR3	Intergenic	2.71649	2.9699	2.62274	6.38264	5.95419	5.68592	0.461036	0.000784766	alpha/beta-Hydrolases superfamily protein (AHRD V3.3 *** AT5G51180.2)
Solyc03g096900.3	SL3.0ch03	60698657	60698918	UTR3	UTR3	UTR3	4.73879	5.99447	5.91968	9.18208	9.4333	9.5558	0.591134	0.00757031	Guanosine-3',5'-bis(Diphosphate) 3'-pyrophosphohydrolase isoform 3 (AHRD V3.3 *** A0A061F675_THECC)
Solyc03g111700.3	SL3.0ch03	63838486	63839032	Intron6	Intron6	Intergenic	4.92279	3.8625	4.73869	7.77855	7.76994	6.15143	0.623227	0.0190078	Metallo-hydrolase/oxidoreductase superfamily protein (AHRD V3.3 *** AT1G29700.2),Pfam:PF13483
Solyc03g114840.3	SL3.0ch03	66198804	66199209	LastExon	UTR3	UTR3	5.16901	4.75432	5.29349	8.47281	8.53392	7.23209	0.627787	0.0110704	MADS-box protein 1
Solyc03g115410.3	SL3.0ch03	66623296	66623541	UTR3	UTR3	UTR3	4.95413	6.30234	5.32406	9.2535	11.5562	8.54027	0.564925	0.0278372	Leucine-rich repeat (LRR) family protein (AHRD V3.3 *** AT5G07910.1)
Solyc03g115415.1	SL3.0ch03	66623296	66623541	Exon2	LastIntron	LastIntron	4.95413	6.30234	5.32406	9.2535	11.5562	8.54027	0.564925	0.0278372	Cysteine/Histidine-rich C1 domain family protein (AHRD V3.3 --* AT3G59130.1)
Solyc03g117365.1	SL3.0ch03	68014865	68015248	Intergenic	Intron1	Intron1	2.18774	1.92905	2.1163	3.35906	3.74253	3.23614	0.602945	0.00426704	14-3-3-like protein (AHRD V3.3 --* 1433_OENEH)
Solyc03g119660.2	SL3.0ch03	69711020	69711406	Exon1	Exon1	Exon1	1.88318	1.83651	2.0037	4.59851	6.53793	6.05345	0.332951	0.0218094	Plant cadmium resistance 2 (AHRD V3.3 *-* A0A0K9PLA8_ZOSMR)
Solyc03g120500.3	SL3.0ch03	70361973	70362222	LastExon	UTR3	UTR3	0.94651	1.09026	0.894169	2.12329	2.6395	2.0272	0.431655	0.0147056	auxin-regulated IAA27
Solyc03g120820.3	SL3.0ch03	70565925	70566151	Exon8	Intron8	Intron8	4.4712	5.97519	5.77068	9.51056	10.2155	8.70187	0.570462	0.00324106	Cytochrome c oxidase assembly protein COX19, putative (AHRD V3.3 *-* B9RQH5_RICCO)
Solyc03g120830.3	SL3.0ch03	70565925	70566151	LastExon	UTR3	UTR3	4.4712	5.97519	5.77068	9.51056	10.2155	8.70187	0.570462	0.00324106	transmembrane protein (AHRD V3.3 *** AT1G52155.1)
Solyc03g120980.3	SL3.0ch03	70697708	70697978	LastExon	LastExon	UTR3	0.957367	0.894	0.928588	1.38653	1.47546	1.47234	0.641379	0.000331141	Pleiotropic drug resistance ABC transporter (AHRD V3.3 *** W0TSU1_ACAMN)
Solyc03g121360.1	SL3.0ch03	70958909	70959209	LastExon	Intergenic	Intergenic	1.77624	1.60174	1.69122	2.68721	2.72011	2.26253	0.660927	0.0189571	Charged multivesicular body 1 (AHRD V3.3 *** A0A0B0N0L1_GOSAR)
Solyc03g121370.3	SL3.0ch03	70958909	70959209	UTR3	Intergenic	Intergenic	1.77624	1.60174	1.69122	2.68721	2.72011	2.26253	0.660927	0.0189571	Ribosomal protein S8 (AHRD V3.3 *** A0A124SDM5_CYNCS)
Solyc03g123520.3	SL3.0ch03	71853803	71854106	UTR3	UTR3	UTR3	2.79517	2.09302	2.64626	4.04791	4.22041	3.38598	0.646495	0.0153345	Polyphosphoinositide phosphatase (AHRD V1 ***- C1H752_PARBA)
Solyc03g123790.3	SL3.0ch03	72019653	72019991	LastExon	Intergenic	Intergenic	2.15549	2.11936	1.89462	3.4823	3.57761	2.80856	0.62517	0.026594	vacuolar cation/proton exchanger (AHRD V3.3 *** AT1G55720.2)
Solyc04g007705.1	SL3.0ch04	1389767	1390113	UTR5	UTR5	LastIntron	8.5534	7.43152	10.1879	16.4431	13.5698	11.9454	0.623781	0.0361493	NAD(P)-binding Rossmann-fold superfamily protein (AHRD V3.3 --* AT5G53090.1)
Solyc04g007710.3	SL3.0ch04	1389767	1390113	LastIntron	UTR3	UTR3	8.5534	7.43152	10.1879	16.4431	13.5698	11.9454	0.623781	0.0361493	mitogen-activated protein kinase 14
Solyc04g008840.3	SL3.0ch04	2458480	2458771	LastExon	UTR3	UTR3	4.42691	4.9536	4.77955	8.59542	7.76577	7.51514	0.593059	0.00354191	Protein FRIGIDA, putative (AHRD V3.3 *** B9SG32_RICCO)
Solyc04g009840.3	SL3.0ch04	3167561	3167797	LastIntron	UTR3	UTR3	8.98715	8.37742	10.0093	15.9649	13.818	12.2705	0.650931	0.029405	TRICHOME BIREFRINGENCE-LIKE 5 (AHRD V3.3 --* AT5G20590.2)
Solyc04g048900.3	SL3.0ch04	38508155	38508475	LastIntron	LastExon	UTR3	1.19463	1.20547	1.20537	2.48638	2.91843	2.23117	0.472168	0.0215401	Calreticulin (AHRD V3.3 *** G7KRL3_MEDTR)
Solyc04g063230.3	SL3.0ch04	55381940	55382227	LastExon	UTR3	UTR3	1.73068	1.39224	1.50063	2.43978	2.31721	2.43962	0.642461	0.00638061	S-adenosyl-L-methionine-dependent methyltransferases superfamily protein (AHRD V3.3 *** AT5G64030.1)
Solyc04g071470.3	SL3.0ch04	58542373	58542646	LastExon	LastExon	UTR3	6.36667	6.69567	8.88636	14.6985	14.8542	11.4773	0.534942	0.0117984	WD40-repeat-containing domain-containing protein (AHRD V3.3 *** A0A103XXC8_CYNCS)
Solyc04g071650.3	SL3.0ch04	58722695	58723026	UTR3	UTR3	UTR3	3.22846	2.74773	3.0892	6.4144	5.67981	5.59943	0.512353	0.00198679	Cellulose synthase (AHRD V3.3 *** M1A8I3_SOLTU)
Solyc04g072560.3	SL3.0ch04	59629429	59629757	UTR3	UTR3	UTR3	5.06873	5.9468	5.84109	11.2063	11.2621	8.27956	0.548219	0.0344335	Regulator of Vps4 activity in the MVB pathway protein (AHRD V3.3 *** A0A061FL82_THECC)
Solyc04g072570.3	SL3.0ch04	59629429	59629757	LastExon	UTR3	UTR3	5.06873	5.9468	5.84109	11.2063	11.2621	8.27956	0.548219	0.0344335	Receptor-like kinase (AHRD V3.3 *** A0A0K9PIY0_ZOSMR)
Solyc04g074480.3	SL3.0ch04	60557523	60557776	LastExon	LastExon	UTR3	1.20059	0.982145	1.12784	1.69375	2.07073	1.50582	0.628157	0.0447718	DAHP synthase 2 precursor
Solyc04g079845.1	SL3.0ch04	64250464	64250776	LastExon	Intergenic	Intergenic	4.32334	4.60543	5.5722	7.22386	8.65621	7.40945	0.622639	0.00815855	Protein DA1-related 1 (AHRD V3.3 *-* A0A1D1YPA3_9ARAE)
Solyc04g080850.3	SL3.0ch04	65006957	65007281	Exon3	UTR3	UTR3	1.40322	1.17392	1.19775	2.12911	2.21597	2.04638	0.590615	0.00108923	Thioredoxin (AHRD V3.3 *** Q201Z4_9SOLN)
Solyc04g081930.3	SL3.0ch04	65866559	65866872	UTR3	UTR3	UTR3	3.37471	3.51511	3.60299	5.43229	5.55544	4.88958	0.660868	0.00772996	Prolyl 4-hydroxylase alpha subunit, putative (AHRD V3.3 *** B9R8F4_RICCO)
Solyc05g006200.3	SL3.0ch05	875080	875468	LastIntron	LastExon	UTR3	7.98606	9.48031	10.2352	17.3819	18.8109	13.976	0.552167	0.0205289	tRNA (guanine(37)-N1)-methyltransferase (AHRD V3.3 *** K4BWE7_SOLLC)
Solyc05g008040.3	SL3.0ch05	2465246	2465530	LastExon	LastExon	UTR3	7.20143	7.6513	8.76662	12.5122	10.9776	12.0506	0.664577	0.00364022	ATP-dependent DNA helicase family protein (AHRD V3.3 *** B9HW67_POPTR)
Solyc05g009630.3	SL3.0ch05	3822417	3822670	LastIntron	Intergenic	Intergenic	3.13846	3.46277	2.6213	4.36881	5.44589	4.13763	0.661003	0.0384562	Disease resistance protein (AHRD V3.3 *** A0A103XDQ0_CYNCS)
Solyc05g012110.3	SL3.0ch05	5316635	5316912	LastExon	UTR3	UTR3	1.27383	1.1709	1.23458	2.19989	2.78666	2.09886	0.51928	0.0317772	6-phosphogluconolactonase, putative (AHRD V3.3 *** B9REC3_RICCO)
Solyc05g013280.3	SL3.0ch05	6386971	6387212	UTR3	UTR3	UTR3	4.22494	3.60049	4.23392	7.01784	7.12217	5.20339	0.623435	0.0481593	Pseudomonas resistance
Solyc05g013285.1	SL3.0ch05	6386971	6387212	Exon1	LastIntron	LastIntron	4.22494	3.60049	4.23392	7.01784	7.12217	5.20339	0.623435	0.0481593	Cysteine-rich receptor-like kinase (AHRD V3.3 *-* G7K057_MEDTR)
Solyc05g014260.3	SL3.0ch05	8048315	8048706	Exon5	Exon5	UTR3	2.55255	1.95574	2.57741	3.71625	4.68485	3.26812	0.607212	0.0486234	Two-component response regulator (AHRD V3.3 *** W9RKG5_9ROSA)
Solyc05g015060.3	SL3.0ch05	9775547	9775808	UTR3	UTR3	UTR3	1.86989	1.63195	1.79241	2.82679	3.04067	2.6616	0.620731	0.00228128	P-loop containing nucleoside triphosphate hydrolases superfamily protein (AHRD V3.3 *** AT3G50940.1)
Solyc05g015070.3	SL3.0ch05	9775547	9775808	LastExon	UTR3	UTR3	1.86989	1.63195	1.79241	2.82679	3.04067	2.6616	0.620731	0.00228128	U-box domain-containing family protein (AHRD V3.3 *** B9HT95_POPTR)
Solyc05g024160.3	SL3.0ch05	30516596	30516970	LastIntron	UTR3	UTR3	9.55539	11.7959	12.4481	19.617	19.8675	15.8293	0.611049	0.0140962	Pyruvate dehydrogenase E1 component subunit beta (AHRD V3.3 *** B6T6H3_MAIZE)
Solyc05g025500.3	SL3.0ch05	32879455	32879716	LastExon	LastExon	UTR3	4.59431	4.9822	4.98612	9.02488	8.74287	6.88431	0.590727	0.0336319	Glucan endo-1,3-beta-glucosidase, putative (AHRD V3.3 *** B9SWK2_RICCO)
Solyc05g050800.3	SL3.0ch05	61835454	61835791	LastExon	UTR3	UTR3	1.2949	1.31594	1.2509	2.05986	2.13285	1.82517	0.641711	0.0134127	phosphoglycerate mutase family protein
Solyc06g010170.3	SL3.0ch06	5287681	5287902	LastIntron	UTR3	UTR3	14.9965	17.831	19.523	27.3558	25.9065	26.2569	0.658338	0.0135811	lysine ketoglutarate reductase trans-splicing protein (DUF707) (AHRD V3.3 *** AT1G67850.7)
Solyc06g060380.3	SL3.0ch06	38519922	38520276	UTR3	UTR3	UTR3	8.12205	9.47755	10.7557	15.7936	17.0873	14.713	0.595775	0.00343713	Sister chromatid cohesion PDS5-like protein (AHRD V3.3 *-* A0A072VH41_MEDTR)
Solyc06g066030.3	SL3.0ch06	41503823	41504083	Exon4	Intron4	Intron5	1.27923	1.28942	1.27246	2.05678	2.23598	2.04203	0.606352	0.00534557	TPX2 (targeting protein for Xklp2) protein family (AHRD V3.3 *** AT4G32330.4)
Solyc06g068370.3	SL3.0ch06	42480159	42480457	UTR3	UTR3	UTR3	0.883504	1.12777	1.0418	2.62035	2.79322	2.40078	0.390701	0.000732578	disease resistance protein (TIR-NBS-LRR class) (AHRD V3.3 --* AT2G17050.3)
Solyc06g068380.3	SL3.0ch06	42480159	42480457	LastIntron	LastIntron	LastExon	0.883504	1.12777	1.0418	2.62035	2.79322	2.40078	0.390701	0.000732578	PPPDE thiol peptidase family protein, putative (AHRD V3.3 *-* A0A061G7Z7_THECC)
Solyc06g068740.3	SL3.0ch06	42729871	42730228	Exon7	Intron7	Intron7	2.76812	2.83448	2.95617	6.14158	7.78783	5.75076	0.434893	0.0264247	NAD(P)-binding Rossmann-fold superfamily protein (AHRD V3.3 *-* AT5G61830.2)
Solyc06g068750.3	SL3.0ch06	42729871	42730228	LastExon	LastExon	UTR3	2.76812	2.83448	2.95617	6.14158	7.78783	5.75076	0.434893	0.0264247	Transferase, transferring glycosyl groups, putative (AHRD V3.3 *** B9RG20_RICCO)
Solyc06g074090.3	SL3.0ch06	45942583	45942798	LastIntron	LastExon	UTR3	5.77174	5.19365	6.59923	10.7449	9.01174	8.99837	0.610837	0.00839766	Sterol delta-7 reductase (AHRD V3.3 *** Q6S5A3_TROMA)
Solyc07g006910.3	SL3.0ch07	1761344	1761781	LastExon	UTR3	UTR3	2.62542	2.85424	3.23831	4.87341	4.91765	3.82946	0.640061	0.0269955	Nucleotide/sugar transporter family protein (AHRD V3.3 *** AT5G55950.1)
Solyc07g007390.3	SL3.0ch07	2130630	2130971	UTR3	UTR3	UTR3	2.22546	2.12271	2.45895	4.04486	3.6553	3.30938	0.618294	0.0109925	Octicosapeptide/Phox/Bem1p domain-containing protein / tetratricopeptide repeat-containing protein (AHRD V3.3 *** A0A061GVW9_THECC)
Solyc07g007395.1	SL3.0ch07	2130630	2130971	UTR3	UTR3	UTR3	2.22546	2.12271	2.45895	4.04486	3.6553	3.30938	0.618294	0.0109925	P-glycoprotein 11 (AHRD V3.3 --* AT1G02520.3)
Solyc07g007400.3	SL3.0ch07	2130630	2130971	LastExon	UTR3	UTR3	2.22546	2.12271	2.45895	4.04486	3.6553	3.30938	0.618294	0.0109925	Leucine-rich repeat family protein (AHRD V3.3 *-* B9HAJ1_POPTR)
Solyc07g007870.3	SL3.0ch07	2553387	2553777	LastExon	LastExon	UTR3	1.70221	1.75138	1.6777	3.63216	4.08184	2.97823	0.479909	0.0281316	12-oxophytodienoate reductase 3
Solyc07g039505.1	SL3.0ch07	47737941	47738205	Intron1	Intron1	Intron1	5.8022	6.62691	6.9238	9.56546	12.6105	10.4858	0.592526	0.0272788	Beta-glucosidase 3 (AHRD V3.3 --* BGL03_ORYSJ)
Solyc07g041735.1	SL3.0ch07	54200138	54200379	LastExon	LastExon	UTR3	4.86243	4.26916	4.91734	8.80135	7.542	6.85339	0.605643	0.0227678	MOB kinase activator-like 1A (AHRD V3.3 *** MOB1A_MEDSF)
Solyc07g042270.3	SL3.0ch07	55518590	55519228	LastExon	UTR3	Intergenic	2.38881	2.33264	2.51078	3.68297	4.2748	3.31159	0.641761	0.0368963	RNA helicase DEAD22
Solyc07g045190.2	SL3.0ch07	58448458	58448711	Exon3	Intron3	Intron3	1.18431	1.18629	1.05275	2.1029	2.60197	1.82521	0.524244	0.040603	RING/U-box superfamily protein, putative (AHRD V3.3 *** A0A061DMB3_THECC)
Solyc07g052390.3	SL3.0ch07	61035624	61035869	LastExon	LastExon	UTR3	4.85471	4.05252	4.12645	7.30352	7.20453	6.97924	0.606576	0.00380814	glutamate receptor-like 3.1
Solyc07g053540.1	SL3.0ch07	62088575	62088849	LastExon	LastExon	LastExon	2.96632	2.89214	3.19112	6.27069	9.1531	8.47483	0.378666	0.0284436	Fasciclin-like arabinogalactan protein (AHRD V3.3 *** A0A072VC68_MEDTR)
Solyc07g053760.3	SL3.0ch07	62319398	62319701	LastExon	UTR3	Intergenic	2.71537	1.91933	2.04679	6.61906	6.32	4.3383	0.386719	0.0282337	Protein phosphatase 2C family protein (AHRD V3.3 *** AT4G28400.1)
Solyc07g053850.3	SL3.0ch07	62380512	62380832	UTR3	UTR3	UTR3	10.931	8.35438	10.6287	18.3376	13.3232	16.8514	0.61663	0.0334529	RING/U-box superfamily protein (AHRD V3.3 *** AT4G28370.4)
Solyc07g053960.3	SL3.0ch07	62488856	62489463	UTR3	UTR3	UTR3	7.9291	9.60981	9.71597	15.0985	15.708	13.4748	0.615493	0.00321554	Ubiquitin conjugating enzyme, putative (AHRD V3.3 *** B9RVZ2_RICCO)
Solyc07g053970.3	SL3.0ch07	62488856	62489463	Intron22	UTR3	Intergenic	7.9291	9.60981	9.71597	15.0985	15.708	13.4748	0.615493	0.00321554	Two pore calcium channel protein 1 (AHRD V3.3 *** TPC1_ARATH)
Solyc07g055020.3	SL3.0ch07	63303424	63303677	LastIntron	UTR3	UTR3	5.08615	4.03003	4.73621	7.83285	8.05197	6.13842	0.62899	0.0281154	F-box protein family (AHRD V3.3 *** A0A151SU61_CAJCA)
Solyc07g062080.3	SL3.0ch07	65041848	65042083	UTR3	UTR3	UTR3	1.01966	0.976105	1.03987	1.46511	1.76789	1.54259	0.635655	0.0200665	mitogen-activated protein kinase 11
Solyc07g062130.3	SL3.0ch07	65070726	65071044	UTR3	Intergenic	Intergenic	2.5029	2.85279	2.97216	5.64056	5.93835	4.81914	0.507856	0.00733933	Trifunctional UDP-glucose 4,6-dehydratase/UDP-4-keto-6-deoxy-D-glucose 3,5-epimerase/UDP-4-keto-L-rhamnose-reductase RHM1 (AHRD V3.3 *** RHM1_ARATH)
Solyc07g062140.3	SL3.0ch07	65070726	65071044	LastExon	UTR3	UTR3	2.5029	2.85279	2.97216	5.64056	5.93835	4.81914	0.507856	0.00733933	trehalose-phosphate synthase 1
Solyc07g062890.3	SL3.0ch07	65655761	65656077	LastIntron	LastExon	UTR3	7.8888	8.83561	9.50152	16.1563	15.3065	12.876	0.59149	0.0130734	Protein yippee-like (AHRD V3.3 *** K4CGX2_SOLLC)
Solyc07g063620.3	SL3.0ch07	66177753	66178028	LastExon	LastExon	UTR3	2.283	2.18519	2.14429	3.66982	3.31724	3.21768	0.647981	0.00836946	membrane lipoprotein lipid attachment site-like protein, putative (DUF1223) (AHRD V3.3 *** AT4G27350.1)
Solyc07g065930.3	SL3.0ch07	67651024	67651243	LastExon	LastExon	UTR3	1.6388	1.36426	1.65574	2.66419	2.77774	2.31666	0.60047	0.00528586	BTB/POZ domain-containing protein (AHRD V3.3 *** A0A097PQ10_SOLLC)
Solyc08g005800.3	SL3.0ch08	628563	628866	LastExon	LastExon	UTR3	1.39679	1.2691	1.33193	2.28105	2.68594	1.90577	0.58169	0.047761	Pectinacetylesterase family protein (AHRD V3.3 *** G7L754_MEDTR)
Solyc08g006640.3	SL3.0ch08	1225747	1226216	LastIntron	UTR3	UTR3	5.24283	6.04965	6.22091	14.2239	15.1956	13.9944	0.403405	7.14284e-05	Monogalactosyldiacylglycerol synthase (AHRD V3.3 *** D8RQT3_SELML)
Solyc08g006645.1	SL3.0ch08	1225747	1226216	Intergenic	Intron1	Intron1	5.24283	6.04965	6.22091	14.2239	15.1956	13.9944	0.403405	7.14284e-05	monodehydroascorbate reductase 1 (AHRD V3.3 --* AT3G52880.2)
Solyc08g007240.3	SL3.0ch08	1828092	1828368	LastExon	LastExon	UTR3	0.944078	0.715135	0.864201	1.71893	1.72116	1.88373	0.473986	0.00051696	Nudix hydrolase (AHRD V3.3 *** A0A061G4C5_THECC)
Solyc08g008230.3	SL3.0ch08	2668300	2668542	UTR3	UTR3	UTR3	3.80439	3.11215	3.62052	6.2588	5.60837	4.74522	0.63429	0.0276134	Protein kinase family protein (AHRD V3.3 --* AT5G38210.3)
Solyc08g041820.3	SL3.0ch08	25716266	25716598	UTR3	UTR3	UTR3	3.43208	3.0687	3.47834	5.60584	5.95503	5.15638	0.596936	0.00288235	Homeobox protein knotted-1, putative (AHRD V3.3 *** B9RNZ6_RICCO)
Solyc08g048240.3	SL3.0ch08	14617991	14618382	UTR3	UTR3	UTR3	5.98739	6.448	7.26736	10.7763	10.7513	9.52858	0.634424	0.00252344	Bifunctional protein FolD (AHRD V3.3 *** W9T0H0_9ROSA)
Solyc08g065320.3	SL3.0ch08	53294837	53295135	LastExon	LastExon	UTR3	1.58664	1.5227	1.62503	3.3524	2.98733	2.71473	0.522876	0.0142326	green ripe-like 1
Solyc08g067050.3	SL3.0ch08	56025858	56026234	UTR3	UTR3	UTR3	10.2197	10.7627	12.0982	19.3639	17.1032	16.0779	0.629568	0.00859589	Arginine N-methyltransferase family protein (AHRD V3.3 *** B9NAU7_POPTR)
Solyc08g069160.3	SL3.0ch08	58284591	58284846	LastExon	LastExon	UTR3	4.10148	3.51851	4.44938	7.92469	6.74638	6.72019	0.56422	0.00448729	sequence-specific DNA binding transcription factor (AHRD V3.3 *** AT4G31270.1)
Solyc08g074600.3	SL3.0ch08	58814833	58815082	LastIntron	UTR3	UTR3	8.84687	11.1475	10.5787	21.8485	22.9172	22.6209	0.453697	0.000743951	ATP-dependent DNA helicase RecQ family protein (AHRD V3.3 *** G7K6R5_MEDTR)
Solyc08g076480.3	SL3.0ch08	60611013	60611353	LastExon	LastExon	UTR3	1.62561	1.33775	1.47397	2.59223	2.92355	2.31415	0.566714	0.0117133	Plastid-lipid associated protein PAP / fibrillin family protein (AHRD V3.3 *** AT2G35490.1)
Solyc08g076720.3	SL3.0ch08	60781778	60782059	LastExon	UTR3	UTR3	2.3748	2.2235	2.44922	4.51791	4.67894	4.1426	0.528321	0.00202177	ABC transporter B family-like protein (AHRD V3.3 *** G7KDP1_MEDTR)
Solyc08g077060.3	SL3.0ch08	61116379	61116669	UTR3	UTR3	UTR3	1.80212	1.53764	2.13623	4.46354	5.0656	3.59395	0.417279	0.0161862	Zinc finger, LSD1-type (AHRD V3.3 *** A0A103XQX8_CYNCS)
Solyc08g078390.3	SL3.0ch08	62334266	62334627	LastExon	LastExon	UTR3	2.94552	3.16795	3.10967	4.68748	5.32377	4.0274	0.656983	0.0464605	peroxisomal acyl-CoA oxidase 1A
Solyc08g080500.3	SL3.0ch08	63897923	63898202	LastIntron	UTR3	UTR3	1.40877	1.19771	1.20207	2.20289	2.19477	1.87184	0.607472	0.00539808	Rhomboid-like protein (AHRD V3.3 *** K4CP50_SOLLC)
Solyc08g080510.3	SL3.0ch08	63905852	63906132	LastExon	UTR3	UTR3	1.97291	2.28061	2.67772	6.892	7.23372	6.61993	0.334106	7.96441e-05	Replication factor C subunit 2 (AHRD V3.3 *** RFC2_ARATH)
Solyc08g080520.3	SL3.0ch08	63931610	63931973	Exon29	LastIntron	LastIntron	8.17996	7.96891	10.0158	14.5659	14.5889	13.4041	0.614788	0.00406364	DNA topoisomerase 4 subunit B (DUF810) (AHRD V3.3 *** AT4G11670.2)
Solyc08g080570.3	SL3.0ch08	63949868	63950234	LastIntron	Intergenic	Intergenic	1.93614	1.82728	1.99662	3.34317	3.45274	2.9088	0.59353	0.0105145	UDP-glucose 4-epimerase (AHRD V3.3 *** GALE1_PEA)
Solyc08g081140.3	SL3.0ch08	64346064	64346352	Exon3	Exon3	UTR3	3.88099	2.93726	3.91174	5.09395	6.24734	4.88761	0.661165	0.0290424	bHLH transcription factor 090
Solyc09g008280.2	SL3.0ch09	1751207	1751808	UTR3	UTR3	UTR3	0.907948	0.949558	0.958739	2.10529	2.43963	1.73178	0.448683	0.0293952	S-adenosyl-L-methionine synthetase Z24743
Solyc09g008295.1	SL3.0ch09	1751207	1751808	Exon4	UTR3	UTR3	0.907948	0.949558	0.958739	2.10529	2.43963	1.73178	0.448683	0.0293952	Thioredoxin, putative (AHRD V3.3 *** B9S0G2_RICCO)
Solyc09g011160.3	SL3.0ch09	4515049	4515332	UTR3	UTR3	UTR3	4.1561	4.00102	5.0168	8.03021	7.12342	6.01729	0.622265	0.0261504	Regulator of chromosome condensation (RCC1) family protein (AHRD V3.3 *** AT3G53830.3)
Solyc09g011170.3	SL3.0ch09	4515049	4515332	LastIntron	UTR3	UTR3	4.1561	4.00102	5.0168	8.03021	7.12342	6.01729	0.622265	0.0261504	Prf interactor 30137
Solyc09g011250.3	SL3.0ch09	4587203	4587515	LastIntron	UTR3	UTR3	10.1653	10.5	11.5019	18.2705	18.6926	16.0141	0.607188	0.00558772	Mitochondrial glycoprotein family protein (AHRD V3.3 *** AT3G55605.1)
Solyc09g011880.3	SL3.0ch09	5156004	5156285	LastExon	UTR3	UTR3	1.56537	1.47235	1.43637	2.84706	2.56083	2.14779	0.592149	0.0330872	chaperone protein dnaJ-like protein (AHRD V3.3 *** AT2G38000.1)
Solyc09g061420.3	SL3.0ch09	59320614	59320819	LastExon	UTR3	UTR3	5.37001	5.799	6.11134	9.23502	9.23235	10.3826	0.598973	0.0025797	phosphoglycolate phosphatase (AHRD V3.3 *** AT5G48830.1)
Solyc09g061840.3	SL3.0ch09	60689250	60689520	LastExon	UTR3	UTR3	2.07663	2.04926	2.16966	3.72323	3.49598	2.98889	0.616721	0.0239882	3-ketoacyl-CoA thiolase (AHRD V3.3 *** P93112_9ROSI)
Solyc09g063010.3	SL3.0ch09	61161464	61161778	Intron2	UTR3	UTR3	9.31386	10.2695	10.4395	15.1559	16.777	13.687	0.65811	0.0176022	bHLH transcription factor 058
Solyc09g064440.3	SL3.0ch09	61951193	61951561	UTR3	UTR3	UTR3	5.56908	5.95022	6.25076	9.24291	9.03217	9.08368	0.64952	0.00182021	ABC transporter family protein (AHRD V3.3 *** A0A097P9R4_HEVBR)
Solyc09g065550.3	SL3.0ch09	63925717	63926029	UTR3	UTR3	Intergenic	2.01392	1.66609	1.81066	2.98067	3.25153	2.56667	0.624021	0.0163805	Kinase interacting (KIP1-like) family protein, putative (AHRD V3.3 *** A0A061DQM7_THECC)
Solyc09g065560.3	SL3.0ch09	63925717	63926029	Exon12	UTR3	UTR3	2.01392	1.66609	1.81066	2.98067	3.25153	2.56667	0.624021	0.0163805	Sulfate transporter (AHRD V3.3 *** D7LTZ8_ARALL)
Solyc09g066120.3	SL3.0ch09	64760958	64761223	UTR3	UTR3	UTR3	4.25193	4.52411	5.66833	7.30862	8.45422	6.07432	0.661458	0.0482415	Poly(RC)-binding protein, putative (AHRD V3.3 *** B9S7H6_RICCO)
Solyc09g075530.3	SL3.0ch09	67658623	67658883	Exon8	Exon8	UTR3	7.26971	8.35438	8.7352	12.8038	11.7379	12.4166	0.659102	0.00220459	Syntaxin (AHRD V3.3 *** A0A0A0YT45_ALBBR)
Solyc09g090190.3	SL3.0ch09	70220982	70221308	LastExon	LastExon	UTR3	2.58297	2.22599	2.51168	4.21142	3.98195	3.80644	0.610062	0.000638453	S-adenosyl-L-methionine-dependent methyltransferases superfamily protein (AHRD V3.3 *** AT1G04430.3)
Solyc09g092430.3	SL3.0ch09	72007434	72007739	LastExon	LastExon	UTR3	2.8885	3.37433	3.28914	6.1923	6.25773	5.53458	0.531119	0.00109711	Selenium binding family protein (AHRD V3.3 *** B9GFI5_POPTR)
Solyc09g098310.3	SL3.0ch09	72673975	72674304	LastIntron	LastExon	UTR3	1.89003	1.42503	1.19928	2.47969	1.97019	2.78145	0.624275	0.0452438	Adhesive/proline-rich protein homolog (AHRD V3.3 *** Q8L8M2_ARATH)
Solyc10g047210.1	SL3.0ch10	40137613	40137937	LastExon	Intergenic	Intergenic	2.31577	2.11212	2.44718	4.16456	3.56033	3.17805	0.63057	0.032163	LOW QUALITY:hyccin (AHRD V3.3 *-* AT5G64090.1)
Solyc10g054080.2	SL3.0ch10	54505136	54505448	LastIntron	LastIntron	LastIntron	7.37576	8.27224	9.84163	15.5983	16.9169	14.6039	0.540961	0.00188392	Kinesin-related protein (AHRD V3.3 *** D3YBF5_TRIRP)
Solyc10g079070.2	SL3.0ch10	60835651	60835899	UTR3	UTR3	UTR3	5.71314	5.72954	6.40733	9.87128	11.2621	8.08428	0.610933	0.0470634	bHLH transcription factor 065
Solyc10g083500.2	SL3.0ch10	63419354	63419679	LastExon	LastExon	UTR3	5.50572	5.40898	6.03814	8.64771	9.518	7.51752	0.660074	0.0274045	Protein kinase family protein (AHRD V3.3 *-* Q9LZS4_ARATH)
Solyc10g085650.2	SL3.0ch10	64891192	64891446	UTR3	UTR3	UTR3	4.50025	3.75051	4.2554	6.36864	7.9681	5.82645	0.620247	0.0459379	Cell-wall invertase (AHRD V3.3 *** Q8LRN9_SOLLC)
Solyc10g085660.2	SL3.0ch10	64891192	64891446	UTR3	UTR3	UTR3	4.50025	3.75051	4.2554	6.36864	7.9681	5.82645	0.620247	0.0459379	F-box family protein (AHRD V3.3 *** AT1G08710.1)
Solyc11g007900.2	SL3.0ch11	2132583	2132838	LastExon	Intergenic	Intergenic	4.88531	5.07951	5.26011	8.80358	8.30703	8.47485	0.595061	8.10122e-05	2-oxoglutarate (2OG) and Fe(II)-dependent oxygenase superfamily protein (AHRD V3.3 *-* AT2G36690.2)
Solyc11g010600.2	SL3.0ch11	3668559	3669080	LastExon	Intergenic	Intergenic	3.08165	3.25744	3.35997	4.92765	5.42853	4.28429	0.662483	0.0320378	O-fucosyltransferase family protein (AHRD V3.3 *** AT5G65470.1)
Solyc11g011130.2	SL3.0ch11	4210281	4210637	LastExon	UTR3	UTR3	2.41776	2.33697	2.29689	4.06325	4.08929	3.46594	0.606932	0.0152072	RNA-binding family protein (AHRD V3.3 *** A0A061ET42_THECC)
Solyc11g013310.2	SL3.0ch11	6276787	6277111	LastExon	LastExon	UTR3	1.45747	1.19626	1.34277	2.40841	2.35182	1.79193	0.609949	0.0360638	SlLAX3
Solyc11g022530.2	SL3.0ch11	14423570	14423885	LastExon	UTR3	UTR3	2.73226	2.35134	2.7728	4.78854	5.41526	4.4759	0.535189	0.00574275	Late embryogenesis abundant protein (LEA) family protein (AHRD V3.3 *** A0A072UTU9_MEDTR)
Solyc11g040150.2	SL3.0ch11	40024846	40025266	LastIntron	LastExon	UTR3	10.1546	12.203	12.7396	19.4561	18.7303	16.2625	0.644589	0.00739263	Heparan-alpha-glucosaminide N-acetyltransferase (AHRD V3.3 *** A0A0B0P2Z2_GOSAR)
Solyc11g068690.2	SL3.0ch11	53624011	53624275	UTR3	UTR3	UTR3	5.81745	5.45565	5.45556	9.0716	10.5479	8.39411	0.597163	0.0240892	Leucine-rich repeat (LRR) family protein (AHRD V3.3 *-* AT5G22320.1)
Solyc11g069290.2	SL3.0ch11	54206569	54206912	LastIntron	UTR3	UTR3	4.46711	3.64411	4.66362	7.83656	6.02396	7.01919	0.61183	0.017924	Pyridoxal biosynthesis protein PDX2 (AHRD V3.3 *** A0A151SGI6_CAJCA)
Solyc11g069500.2	SL3.0ch11	54399262	54399588	LastIntron	UTR3	UTR3	5.29216	4.85825	5.08718	7.90719	7.78173	7.16817	0.666647	0.00198157	Auxin Response Factor 10A
Solyc12g009500.2	SL3.0ch12	2767684	2767914	UTR3	UTR3	UTR3	2.345	2.40215	2.36524	3.32407	3.98624	3.45574	0.660631	0.0258483	Elongator complex protein 6 (AHRD V3.3 *** ELP6_ARATH)
Solyc12g010640.2	SL3.0ch12	3593125	3593351	LastExon	LastExon	UTR3	8.74346	9.06343	8.81928	16.5427	16.2514	13.7788	0.571709	0.0160338	Aldolase-type TIM barrel family protein (AHRD V3.3 --* AT3G14130.4)
Solyc12g010730.2	SL3.0ch12	3645099	3645367	UTR3	UTR3	UTR3	1.45611	1.22179	1.46842	2.49517	2.70174	2.06281	0.57114	0.0189566	Plant/F9H3-4 protein (AHRD V3.3 *** A0A072VLR0_MEDTR)
Solyc12g014090.2	SL3.0ch12	4901983	4902183	LastIntron	UTR3	UTR3	7.49153	8.30451	9.12817	16.3038	20.302	16.6948	0.467616	0.0101828	TAF RNA polymerase I subunit A (AHRD V3.3 *** AT1G53200.1),Pfam:PF14929
Solyc12g014120.2	SL3.0ch12	4931233	4931609	UTR3	UTR3	UTR3	3.55916	3.65763	4.1211	5.83505	5.90479	5.39713	0.661604	0.00123081	Actin cytoskeleton-regulatory complex protein pan1, putative isoform 2 (AHRD V3.3 *** A0A061F841_THECC)
Solyc12g014220.2	SL3.0ch12	5062524	5062788	UTR3	UTR3	UTR3	6.06022	5.59685	7.3201	10.0974	11.8018	8.75422	0.619088	0.0279963	muscle M-line assembly protein (AHRD V3.3 *-* AT1G53800.3)
Solyc12g021160.1	SL3.0ch12	14400282	14400578	Intergenic	UTR3	Intergenic	2.01162	1.65894	1.88109	4.41561	3.83194	4.31307	0.441988	0.00113526	LOW QUALITY:cysteine-rich RLK (RECEPTOR-like protein kinase) 29 (AHRD V3.3 --* AT4G21410.3)
Solyc12g038920.2	SL3.0ch12	52401935	52402319	LastExon	UTR3	Intergenic	3.96187	3.05045	3.61921	5.89909	5.19575	5.16305	0.653931	0.006538	serine/threonine protein kinase 3 (AHRD V3.3 *** AT5G08160.1)
Solyc12g042430.2	SL3.0ch12	58628229	58628485	LastExon	LastExon	UTR3	4.25715	3.62696	4.66186	5.49109	7.42144	5.95528	0.664941	0.0486962	Inositol polyphosphate multikinase (AHRD V3.3 *** K4DF36_SOLLC)
Solyc12g044230.2	SL3.0ch12	60073743	60074018	LastIntron	LastExon	UTR3	1.00472	0.756695	0.839593	2.48387	2.19288	2.32245	0.371615	0.000217056	Sulfite exporter TauE/SafE family protein (AHRD V3.3 *** AT2G25737.1)
Solyc12g094520.2	SL3.0ch12	65716194	65716556	LastIntron	UTR3	Intergenic	3.16254	3.30204	3.28843	5.83343	5.34056	4.968	0.604201	0.0116238	4-coumarate--CoA ligase family protein (AHRD V3.3 *** B9H5E9_POPTR)
Solyc12g099930.2	SL3.0ch12	67867093	67867351	LastIntron	LastExon	Intergenic	2.71766	3.2261	2.70886	4.01894	5.14119	4.37499	0.639271	0.0222631	alanine:glyoxylate aminotransferase (AHRD V3.3 *** AT2G13360.3)

## Sheet: Table S8
Table S8. Transcripts with higher m6A peak enrichment in Cnr mutant fruit at 42 DPA compared to wild-type fruit at 42 DPA. WT, wild-type; DPA, days post-anthesis.
Overlapped gene ID	Chromosome	Peak Start	Peak End	Overlap_Begin	Overlap_Center	Overlap_End	m6A enrichment in peaks						Fold change in m6A enrichment (Cnr/WT)	P value	Gene descriptions
							Cnr-42DPA Replicate1	Cnr-42DPA Replicate 2	Cnr-42DPA Replicate 3	WT-42DPA Replicate 1	WT-42DPA Replicate 2	WT-42DPA Replicate 3
Solyc00g007100.3	SL3.0ch02	32683640	32684281	LastExon	LastExon	UTR3	3.20881	3.44938	3.26552	2.33284	2.20655	1.93134	1.53363	0.00251638	Kinase family protein (AHRD V3.3 *** B9H679_POPTR)
Solyc00g009140.3	SL3.0ch00	7891202	7891600	LastExon	LastExon	Intergenic	8.81349	7.11158	9.12696	5.1033	5.72909	4.50539	1.63336	0.0183258	NAD(P)-binding Rossmann-fold superfamily protein (AHRD V3.3 *** AT4G09750.1)
Solyc00g011870.1	SL3.0ch00	9376616	9376871	LastExon	Intergenic	Intergenic	11.4028	10.8313	13.801	1.25414	1.30759	1.21069	9.55227	0.00703775	LOW QUALITY:Protein phosphatase 2C family protein (AHRD V3.3 *-* AT4G31860.1)
Solyc00g027770.3	SL3.0ch00	11482795	11483331	LastExon	LastExon	Intergenic	6.62891	6.10199	7.05906	4.35657	4.7499	3.80805	1.53238	0.00414597	Pectinesterase (AHRD V3.3 *** A0A0V0I597_SOLCH)
Solyc00g231780.2	SL3.0ch00	18703108	18703438	LastIntron	LastIntron	LastExon	23.3839	19.5001	26.4422	17.3788	13.4495	12.7987	1.58907	0.0300033	NAD(P)H-quinone oxidoreductase subunit I, chloroplastic (AHRD V3.3 *-* NDHI_NANDO)
Solyc01g005240.3	SL3.0ch01	191329	191652	LastExon	LastExon	UTR3	5.2393	4.48189	5.30685	2.94118	3.33534	2.93762	1.63098	0.00768942	Aspartokinase (AHRD V3.3 *** A0A0V0ILQ3_SOLCH)
Solyc01g005250.3	SL3.0ch01	191329	191652	UTR3	UTR3	Intergenic	5.2393	4.48189	5.30685	2.94118	3.33534	2.93762	1.63098	0.00768942	Aspartate-semialdehyde dehydrogenase (AHRD V3.3 *** V5N8M5_PHAVU)
Solyc01g005380.2	SL3.0ch01	265177	265584	UTR3	UTR3	UTR3	17.8071	15.3726	18.3718	9.74368	10.9385	8.242	1.7823	0.00364268	Unknown protein (AHRD V3.3 )
Solyc01g005385.1	SL3.0ch01	265177	265584	LastExon	LastExon	Intergenic	17.8071	15.3726	18.3718	9.74368	10.9385	8.242	1.7823	0.00364268	Histone-lysine N-methyltransferase setd3 (AHRD V3.3 *** A0A0B0MR23_GOSAR)
Solyc01g005930.3	SL3.0ch01	609864	610198	LastExon	LastExon	UTR3	4.76977	3.73037	4.66521	2.65946	2.9161	2.21905	1.68903	0.0152257	Lipase/lipooxygenase, PLAT/LH2 (AHRD V3.3 *** A0A118JU91_CYNCS)
Solyc01g006040.3	SL3.0ch01	712563	713006	UTR3	UTR3	UTR3	6.88368	7.14903	7.45356	4.52165	5.47076	3.78952	1.55902	0.0245033	E3 ubiquitin-protein ligase BRE1-like 2 (AHRD V3.3 *** A0A0B0NKV7_GOSAR)
Solyc01g006180.3	SL3.0ch01	812367	812614	UTR3	UTR3	UTR3	8.18198	7.34321	7.29084	3.31824	4.30414	3.10239	2.12741	0.00129795	P-loop containing nucleoside triphosphate hydrolases superfamily protein (AHRD V3.3 *** AT4G10620.1)
Solyc01g006230.3	SL3.0ch01	858553	858970	LastExon	LastExon	Intergenic	5.10568	4.56938	4.76186	3.04859	3.22848	2.78985	1.59226	0.00108061	Cysteine protease ATG4B, putative (AHRD V3.3 *** B9STA6_RICCO)
Solyc01g006490.3	SL3.0ch01	1081314	1081652	LastExon	UTR3	UTR3	4.90263	4.36391	4.63843	3.09936	2.92063	2.4313	1.6453	0.00247802	uncharacterized protein
Solyc01g006680.3	SL3.0ch01	1260004	1260291	UTR3	UTR3	UTR3	7.10613	5.86289	6.74845	2.77231	2.81016	2.78778	2.35566	0.00936192	2-oxoglutarate (2OG) and Fe(II)-dependent oxygenase superfamily protein (AHRD V3.3 *** AT3G20810.5)
Solyc01g006930.3	SL3.0ch01	1510616	1510923	UTR3	UTR3	UTR3	4.93414	4.33335	5.02897	3.12874	3.44102	2.88017	1.51286	0.00512528	Nuclear transcription factor Y subunit A-10, putative (AHRD V3.3 *** A0A061EVQ6_THECC)
Solyc01g007855.1	SL3.0ch01	1953783	1954190	UTR3	UTR3	LastIntron	5.14687	5.1199	5.40016	3.38481	3.57923	2.9414	1.58165	0.00332031	Pentatricopeptide repeat (PPR) superfamily protein (AHRD V3.3 --* AT3G46870.2)
Solyc01g007860.3	SL3.0ch01	1953783	1954190	LastIntron	UTR3	Intergenic	5.14687	5.1199	5.40016	3.38481	3.57923	2.9414	1.58165	0.00332031	ubiquitin-conjugating enzyme E2 variant 1D
Solyc01g008260.3	SL3.0ch01	2318545	2318953	LastExon	LastExon	UTR3	4.66924	5.10045	4.52811	3.01362	3.53817	2.5923	1.56361	0.00962892	E2F-associated phosphoprotein (AHRD V3.3 *** AT5G08320.1)
Solyc01g008340.3	SL3.0ch01	2404838	2405290	LastIntron	UTR3	UTR3	8.97881	7.5302	9.23785	5.58574	5.30076	4.79154	1.64222	0.013142	L19 ribosomal protein
Solyc01g008530.3	SL3.0ch01	2565384	2565663	LastExon	UTR3	UTR3	18.8585	14.9101	19.7815	5.1559	4.50391	5.51536	3.5288	0.0110164	phenylacetaldehyde reductase
Solyc01g008780.3	SL3.0ch01	2757200	2757448	LastExon	LastExon	UTR3	3.70073	3.1938	4.20393	2.25226	2.50705	1.92083	1.66141	0.0192441	Phospholipase A2 family protein (AHRD V3.3 *** AT4G29070.2)
Solyc01g008930.4	SL3.0ch01	2882847	2883114	UTR3	UTR3	Intergenic	15.116	11.9953	16.3709	7.04028	8.35071	6.74134	1.96465	0.0209696	AUREA phytochromobilin synthase
Solyc01g009010.3	SL3.0ch01	2954358	2954743	LastIntron	LastExon	UTR3	8.19983	6.56146	7.89266	4.95546	5.27531	4.35363	1.5533	0.0172256	4-diphosphocytidyl-2-C-methyl-D-erythritol kinase
Solyc01g010000.3	SL3.0ch01	4548267	4548537	LastExon	UTR3	Intergenic	5.00682	4.81979	4.86074	3.0639	3.84	2.81984	1.51046	0.0294124	ACT domain containing protein, putative, expressed (AHRD V3.3 *** Q75IY1_ORYSJ)
Solyc01g010480.3	SL3.0ch01	5310348	5310760	LastExon	UTR3	UTR3	5.78399	5.18971	5.42092	3.55228	3.99656	2.98295	1.55668	0.00847926	LOV/LOV protein (AHRD V3.3 *** E3WH16_SOLLC)
Solyc01g014245.1	SL3.0ch01	11868991	11869260	LastExon	Intergenic	Intergenic	3.59761	3.29547	3.53361	2.1413	2.65232	1.80572	1.57996	0.0240957	Protein kinase superfamily protein (AHRD V3.3 --* AT5G01850.2)
Solyc01g014490.3	SL3.0ch01	13909561	13909900	LastExon	UTR3	UTR3	11.1619	7.48316	11.2634	4.66161	3.34708	3.11429	2.68889	0.0252264	DNA topoisomerase 6 subunit B (AHRD V3.3 *** K4AU86_SOLLC)
Solyc01g020240.3	SL3.0ch01	27889117	27889557	LastIntron	LastExon	Intergenic	18.6603	14.354	20.6152	9.73495	7.99848	8.4931	2.04486	0.0310524	THUMP domain-containing protein 1 (AHRD V3.3 *** A0A1D1ZBW7_9ARAE)
Solyc01g028810.3	SL3.0ch01	41292399	41292757	LastIntron	LastExon	UTR3	5.44432	4.90348	5.6036	2.96591	3.46662	2.60669	1.76469	0.00235985	Chaperonin-60 beta subunit (AHRD V3.3 *** P93570_SOLTU)
Solyc01g049960.3	SL3.0ch01	47608934	47609374	LastIntron	LastIntron	Intergenic	33.1983	25.1016	36.0144	19.1103	16.3214	16.362	1.82096	0.0408574	Chromosome-associated kinesin KIF4 (AHRD V3.3 *** A0A0B0MX86_GOSAR)
Solyc01g058450.3	SL3.0ch01	66501147	66501567	UTR3	UTR3	Intergenic	11.2862	8.38341	11.4778	5.86294	7.43971	5.25427	1.67848	0.03147	Flowering time control protein FCA, putative (AHRD V3.3 *** B9RZT3_RICCO)
Solyc01g059860.3	SL3.0ch01	68840894	68841399	UTR3	UTR3	UTR3	9.62814	8.06178	9.7114	4.79573	4.94993	4.1076	1.97797	0.00545742	MAP kinase kinase kinase 3
Solyc01g065840.3	SL3.0ch01	72245905	72246225	UTR3	UTR3	Intergenic	5.7701	4.67305	6.3463	2.88674	3.76801	2.33542	1.86753	0.0164722	F-box family protein (AHRD V3.3 *** B9GFH4_POPTR)
Solyc01g066480.3	SL3.0ch01	74291410	74291708	LastIntron	UTR3	UTR3	6.17503	5.27809	6.58844	3.89048	4.22203	3.29529	1.58151	0.0122636	Fumarylacetoacetate hydrolase, putative (AHRD V3.3 *** B9RT83_RICCO)
Solyc01g066720.3	SL3.0ch01	74687069	74687425	LastExon	UTR3	UTR3	3.28918	3.34915	3.02984	1.96247	2.43296	1.74618	1.57421	0.0150448	Hypoxia-responsive family protein (AHRD V3.3 *** G7I8Q8_MEDTR)
Solyc01g067080.3	SL3.0ch01	75227761	75228236	LastExon	UTR3	UTR3	7.32118	6.34242	7.2707	3.8371	4.12068	3.4398	1.83673	0.00225249	dynein beta chain, ciliary protein (AHRD V3.3 *** AT3G21400.1)
Solyc01g067710.3	SL3.0ch01	76466874	76467193	UTR3	UTR3	UTR3	4.30971	4.04016	4.015	2.61388	2.25042	2.31942	1.72123	0.000340106	(Sodium/potassium)/proton exchanger 3
Solyc01g067800.3	SL3.0ch01	76588793	76589334	LastIntron	UTR3	UTR3	10.4452	9.32872	10.5132	6.03628	6.6968	5.60086	1.65197	0.00153221	RING/U-box superfamily protein (AHRD V3.3 *** A0A061EMU5_THECC)
Solyc01g067820.3	SL3.0ch01	76612297	76612865	UTR3	UTR3	UTR3	17.5625	14.1214	17.9424	9.15575	10.5336	8.30855	1.7725	0.0129869	DNA mismatch repair protein (AHRD V3.3 *** AT3G62450.1)
Solyc01g068020.3	SL3.0ch01	76874189	76874626	LastIntron	UTR3	UTR3	8.71367	8.34428	8.01394	5.29385	6.56422	4.21612	1.55976	0.0384417	Polyketide cyclase / dehydrase and lipid transport protein (AHRD V3.3 *** AT4G01883.1)
Solyc01g068060.3	SL3.0ch01	76894673	76895157	Exon4	UTR3	UTR3	7.26214	6.3439	7.20845	4.80991	4.78162	4.18789	1.51055	0.0043886	Autophagy-related protein (AHRD V3.3 *-* K7VT17_SOLTU)
Solyc01g068500.3	SL3.0ch01	77562434	77562688	LastExon	LastExon	UTR3	17.2732	15.6868	17.383	7.45517	7.79104	6.91102	2.27208	0.000787978	ERD (Early-responsive to dehydration stress) family protein (AHRD V3.3 *** G7IW32_MEDTR)
Solyc01g079610.3	SL3.0ch01	78573332	78573697	LastExon	UTR3	UTR3	6.99763	5.62575	7.50853	4.41842	4.20439	3.67398	1.63717	0.0302313	DNAJ heat shock family protein (AHRD V3.3 *** AT3G62600.1)
Solyc01g079820.3	SL3.0ch01	78807503	78807825	LastIntron	UTR3	Intergenic	6.42913	4.92273	6.29045	3.34369	3.99058	2.85503	1.73146	0.0168805	Peroxiredoxin (AHRD V3.3 *** Q5JBR7_IPOBA)
Solyc01g080110.3	SL3.0ch01	79114755	79115317	LastExon	UTR3	UTR3	11.7748	9.60666	12.7624	7.7822	7.33015	7.04724	1.54082	0.0442983	TVP38/TMEM64 family membrane protein (AHRD V3.3 *** A0A0B2RII2_GLYSO)
Solyc01g080160.3	SL3.0ch01	79211447	79211821	LastExon	LastExon	UTR3	13.8371	11.0641	15.2515	6.85362	7.86391	6.4627	1.89576	0.0259395	DUF21 domain-containing protein (AHRD V3.3 *** A0A0B2P6Y2_GLYSO)
Solyc01g080210.3	SL3.0ch01	79277534	79277924	LastExon	UTR3	UTR3	10.8409	8.53907	9.95769	6.72448	6.17663	5.96583	1.55497	0.0253141	Ribonucleoside-diphosphate reductase small chain family protein (AHRD V3.3 *** B9HMC3_POPTR)
Solyc01g080400.3	SL3.0ch01	79506910	79507243	UTR3	UTR3	UTR3	8.06022	6.46229	7.81054	5.3555	4.39986	4.77731	1.53675	0.0177557	Protein phosphatase 2C family protein (AHRD V3.3 *** AT3G06270.1)
Solyc01g080415.1	SL3.0ch01	79510776	79510970	LastIntron	UTR3	UTR3	2.8759	2.38351	2.91038	1.94986	1.8898	1.56418	1.51185	0.014516	Cox19-like CHCH family protein (AHRD V3.3 --* AT5G18920.2)
Solyc01g080760.3	SL3.0ch01	79834172	79834463	LastExon	UTR3	UTR3	12.6019	10.6218	13.9332	7.7169	8.57589	6.70789	1.61547	0.0213102	Embryo defective 1703 protein, putative (AHRD V3.3 *-* G8A2Y6_MEDTR)
Solyc01g086740.3	SL3.0ch01	81572102	81572593	LastIntron	LastExon	Intergenic	9.80594	8.69626	9.74797	5.81443	6.54767	5.4865	1.58277	0.00206229	DnaJ-like protein (AHRD V3.3 *** C4T7Z2_TOBAC)
Solyc01g087240.3	SL3.0ch01	82059403	82059789	UTR3	UTR3	UTR3	10.6516	8.26305	11.0125	6.93997	6.9214	5.96615	1.50938	0.0462315	nuclear transcription factor Y subunit A-9
Solyc01g087260.3	SL3.0ch01	82073038	82073471	LastIntron	UTR3	UTR3	7.79425	6.5877	8.1974	4.9172	5.36844	4.19203	1.5596	0.0131856	carotenoid cleavage dioxygenase 1B
Solyc01g087320.3	SL3.0ch01	82117493	82117982	LastExon	UTR3	UTR3	19.9804	14.3795	19.7167	9.6833	9.63345	8.96076	1.91235	0.0402609	PHD finger family protein (AHRD V3.3 *-* AT3G08020.1)
Solyc01g087730.3	SL3.0ch01	82538320	82538685	LastExon	LastExon	UTR3	3.75456	3.54353	3.83675	2.50445	2.65242	2.11471	1.53128	0.00531366	Ribosomal protein (AHRD V3.3 *** K4AYG3_SOLLC)
Solyc01g088020.3	SL3.0ch01	82757483	82757936	LastExon	LastExon	UTR3	6.88998	5.63665	7.37892	4.53258	4.57656	3.8749	1.53308	0.0316885	Transducin/WD40 repeat-like superfamily protein (AHRD V3.3 *** AT1G18830.3)
Solyc01g088600.3	SL3.0ch01	83243203	83243444	LastExon	LastExon	UTR3	10.8255	9.58884	10.9418	6.37976	6.57581	5.59725	1.6901	0.00204485	Protein TRIGALACTOSYLDIACYLGLYCEROL 4, chloroplastic (AHRD V3.3 *** A0A199W3Y6_ANACO)
Solyc01g088610.3	SL3.0ch01	83243203	83243444	UTR3	UTR3	Intergenic	10.8255	9.58884	10.9418	6.37976	6.57581	5.59725	1.6901	0.00204485	10 kDa chaperonin (AHRD V3.3 *** A0A0B2PT56_GLYSO)
Solyc01g090280.3	SL3.0ch01	83813773	83814300	LastExon	Intergenic	Intergenic	9.92236	8.4708	10.496	6.44011	6.53793	5.72423	1.54469	0.0179719	Leucine carboxyl methyltransferase, putative (AHRD V3.3 *** B9RCZ7_RICCO)
Solyc01g090480.3	SL3.0ch01	84036374	84036809	Exon10	UTR3	LastIntron	6.02258	5.38685	5.76524	3.15946	3.74674	3.02672	1.72906	0.00127285	RNA-binding KH domain-containing protein isoform 1 (AHRD V3.3 *** A0A061DUL9_THECC)
Solyc01g090500.3	SL3.0ch01	84050869	84051281	UTR3	UTR3	Intergenic	12.6731	10.8514	12.2656	7.69787	7.64533	6.66678	1.62609	0.00414839	Mitochondrial transcription termination factor family protein, putative (AHRD V3.3 *** A0A061DUF5_THECC)
Solyc01g091210.3	SL3.0ch01	84767012	84767415	LastIntron	UTR3	UTR3	19.6997	16.1952	18.8381	11.1837	12.6506	10.1263	1.61166	0.00788922	RNA 2'-phosphotransferase isoform 2 (AHRD V3.3 *** A0A061DV31_THECC)
Solyc01g091340.3	SL3.0ch01	84866540	84866982	LastExon	Intergenic	Intergenic	10.1456	8.25546	10.5874	6.27754	6.78087	5.82851	1.53484	0.0296748	Peptidyl-prolyl cis-trans isomerase (AHRD V3.3 *-* A0A0K9P1Y7_ZOSMR)
Solyc01g091350.3	SL3.0ch01	84866540	84866982	UTR3	UTR3	UTR3	10.1456	8.25546	10.5874	6.27754	6.78087	5.82851	1.53484	0.0296748	ATP-dependent DNA helicase 2 subunit KU80 (AHRD V3.3 *** K4AZ75_SOLLC)
Solyc01g091480.3	SL3.0ch01	84982020	84982289	UTR3	UTR3	UTR3	10.8097	9.86284	11.1322	6.64532	7.55683	5.45598	1.61789	0.00806859	Kinesin-like protein (AHRD V3.3 *** K4AZ88_SOLLC)
Solyc01g091630.3	SL3.0ch01	85096624	85097235	LastExon	UTR3	UTR3	2.55601	2.43016	2.47872	1.55835	1.51282	1.3273	1.69715	0.00101405	cutin deficient 2
Solyc01g091650.3	SL3.0ch01	85119523	85119938	LastExon	UTR3	UTR3	5.73809	5.32219	5.64298	3.62923	3.61033	3.14779	1.60804	0.000604538	COP9 signalosome complex subunit 1 (AHRD V3.3 *** AT3G61140.1)
Solyc01g091690.3	SL3.0ch01	85145985	85146435	LastExon	UTR3	UTR3	2.0599	1.85513	2.11029	1.22399	1.07215	1.25534	1.69657	0.0015282	S-adenosyl-L-methionine-dependent methyltransferases superfamily protein (AHRD V3.3 *** AT4G00750.1)
Solyc01g091800.3	SL3.0ch01	85233990	85234279	UTR3	UTR3	UTR3	12.1222	9.8498	12.4081	7.76371	7.61203	6.83173	1.54813	0.0267479	rRNA adenine N(6)-methyltransferase (AHRD V3.3 *** K4AZC0_SOLLC)
Solyc01g091850.3	SL3.0ch01	85272782	85273203	UTR3	UTR3	UTR3	9.53213	8.55519	10.3532	6.13053	6.36872	5.66176	1.56602	0.0127917	Vacuolar iron family transporter (AHRD V3.3 *** C1E094_MICCC)
Solyc01g091860.3	SL3.0ch01	85272782	85273203	LastExon	UTR3	UTR3	9.53213	8.55519	10.3532	6.13053	6.36872	5.66176	1.56602	0.0127917	SET domain-containing protein (AHRD V3.3 *** AT1G01920.2)
Solyc01g091900.3	SL3.0ch01	85312072	85312381	LastIntron	LastExon	UTR3	10.7212	8.89641	10.9289	5.75825	7.45184	4.76466	1.69941	0.0156802	Peroxisome biogenesis 16-like protein (AHRD V3.3 *** A0A0B0MSZ8_GOSAR)
Solyc01g094150.3	SL3.0ch01	85582653	85583125	LastExon	LastExon	UTR3	11.8185	10.4611	11.61	7.0563	8.29947	6.53772	1.54793	0.00458447	Katanin p60 ATPase-containing subunit (AHRD V3.3 *-* A0A1D1Y047_9ARAE)
Solyc01g094630.3	SL3.0ch01	85949623	85950067	Exon7	Exon7	UTR3	9.07573	7.52251	10.0295	5.23434	5.94287	4.83552	1.66291	0.025489	pre-mRNA-splicing factor CWC22-like protein (DUF3245) (AHRD V3.3 *** AT3G61370.3)
Solyc01g094680.3	SL3.0ch01	86008841	86009464	LastExon	LastExon	UTR3	9.80955	8.02572	9.41309	5.90786	5.92937	5.07373	1.61128	0.0108614	Signal peptide peptidase-like protein (AHRD V3.3 *** G7LBR2_MEDTR)
Solyc01g094790.3	SL3.0ch01	86073628	86074013	Exon8	LastExon	UTR3	5.03019	4.63281	4.84381	2.1373	2.07329	1.97964	2.3435	0.000455059	Cysteine synthase (AHRD V3.3 *** K4AZL9_SOLLC)
Solyc01g095210.3	SL3.0ch01	86423984	86424358	LastExon	UTR3	UTR3	6.49123	5.56947	6.85351	3.8606	4.0391	4.08446	1.57827	0.0233898	Golgin candidate 4-like protein (AHRD V3.3 *** A0A0B0PVX8_GOSAR)
Solyc01g095470.3	SL3.0ch01	86596367	86597082	LastExon	LastExon	UTR3	7.79519	6.56496	7.72545	2.74398	2.75579	2.52967	2.75058	0.00582065	Aldose 1-epimerase, putative (AHRD V3.3 *** B9RE17_RICCO)
Solyc01g095480.3	SL3.0ch01	86596367	86597082	LastIntron	UTR3	UTR3	7.79519	6.56496	7.72545	2.74398	2.75579	2.52967	2.75058	0.00582065	Exosome complex exonuclease RRP41, putative (AHRD V3.3 *** B9SWZ0_RICCO)
Solyc01g095560.3	SL3.0ch01	86650841	86651188	UTR3	UTR3	UTR3	11.4849	9.30406	11.4542	6.74915	5.53267	5.0457	1.8608	0.00672058	Cysteine proteinases superfamily protein (AHRD V3.3 --* AT3G48350.1)
Solyc01g095570.3	SL3.0ch01	86650841	86651188	LastExon	Intergenic	Intergenic	11.4849	9.30406	11.4542	6.74915	5.53267	5.0457	1.8608	0.00672058	Mitochondrial substrate carrier family protein (AHRD V3.3 *** B9I8V0_POPTR)
Solyc01g096090.3	SL3.0ch01	87073689	87073970	Intron3	Intron3	Intron3	3.16649	2.95597	3.08237	2.02226	1.9557	1.79549	1.59434	0.000242543	Transmembrane protein, putative (AHRD V3.3 *** A0A072U5P8_MEDTR)
Solyc01g096350.3	SL3.0ch01	87292683	87293065	LastIntron	UTR3	UTR3	10.3035	8.29806	11.0451	5.32288	6.03443	4.82537	1.832	0.0192883	CDPK-related protein kinase (AHRD V3.3 *** A0A0B0NV52_GOSAR)
Solyc01g096475.1	SL3.0ch01	87438408	87438831	LastExon	LastExon	UTR3	8.58016	7.65666	8.51575	5.79975	5.89748	4.71923	1.50779	0.00523067	Thioredoxin-like protein CITRX, chloroplastic (AHRD V3.3 *** CITRX_SOLLC)
Solyc01g096490.3	SL3.0ch01	87438408	87438831	UTR3	UTR3	UTR3	8.58016	7.65666	8.51575	5.79975	5.89748	4.71923	1.50779	0.00523067	protein kinases%3Bubiquitin-protein ligase (AHRD V3.3 *** AT5G13530.1)
Solyc01g096610.3	SL3.0ch01	87561564	87561949	LastIntron	LastExon	UTR3	8.51135	6.39744	8.36686	5.82839	4.86843	4.43739	1.53795	0.0367431	UPF0468 protein CG5343 (AHRD V3.3 *** A0A0B2SV55_GLYSO)
Solyc01g096870.3	SL3.0ch01	87746992	87747448	LastExon	LastExon	Intergenic	5.03396	4.17784	4.93524	3.12495	3.4893	2.59529	1.53613	0.0118184	Prolyl-tRNA synthetase, putative (AHRD V3.3 *** B9RIU3_RICCO)
Solyc01g096910.3	SL3.0ch01	87784823	87785186	UTR3	UTR3	UTR3	11.0985	8.29285	11.5348	5.85265	4.56061	5.39397	1.95645	0.026746	Vacuolar protein sorting-associated protein 36 (AHRD V3.3 *** A0A1D1ZJY1_9ARAE)
Solyc01g097450.3	SL3.0ch01	88186898	88187303	LastIntron	Intergenic	Intergenic	12.5322	10.4102	13.7002	8.31318	8.61376	7.07432	1.52669	0.031071	PITH domain-containing protein (AHRD V3.3 *** W9S6X8_9ROSA)
Solyc01g097810.3	SL3.0ch01	88390878	88391208	LastExon	UTR3	UTR3	6.1724	4.62543	6.98952	3.19347	2.91452	2.72916	2.01279	0.0454688	zeta-carotene desaturase
Solyc01g097880.3	SL3.0ch01	88455309	88455654	LastExon	LastExon	UTR3	3.91707	3.37435	4.14773	2.17178	2.37473	2.04014	1.73672	0.0101709	Cytidine/deoxycytidylate deaminase family protein (AHRD V3.3 *** AT5G28050.3)
Solyc01g098190.3	SL3.0ch01	88662185	88662561	LastExon	LastExon	UTR3	5.06561	5.36219	4.83767	2.42642	2.78586	1.95996	2.12841	0.00146166	(Sodium/potassium)/proton exchanger 4
Solyc01g098200.3	SL3.0ch01	88662982	88663346	LastExon	UTR3	UTR3	9.56917	7.97666	9.10893	4.64134	4.74804	3.76604	2.02614	0.00244468	Vesicle-associated protein 1-1 (AHRD V3.3 *** A0A1D1Y4C8_9ARAE)
Solyc01g098340.3	SL3.0ch01	88767052	88767380	UTR3	UTR3	Intergenic	6.52359	4.88915	6.81395	4.09967	4.51611	3.23021	1.53864	0.0495294	DnaJ domain-containing protein (AHRD V3.3 *** A0A103XK41_CYNCS)
Solyc01g098350.3	SL3.0ch01	88767052	88767380	UTR3	UTR3	UTR3	6.52359	4.88915	6.81395	4.09967	4.51611	3.23021	1.53864	0.0495294	L1_1
Solyc01g098380.3	SL3.0ch01	88779997	88780414	LastIntron	UTR3	UTR3	9.38988	7.90163	9.17536	4.6505	4.42721	3.98852	2.02559	0.00463348	Dihydrodipicolinate reductase, putative (AHRD V3.3 *** B9T529_RICCO)
Solyc01g098455.1	SL3.0ch01	88852220	88852465	LastExon	LastExon	Intergenic	4.90859	4.35739	5.46996	2.7558	2.90766	3.1223	1.67725	0.0173062	Homogentisate 1,2-dioxygenase (AHRD V3.3 *-* Q9M6U1_SOLLC)
Solyc01g098460.3	SL3.0ch01	88852220	88852465	Intergenic	Intergenic	Intron1	4.90859	4.35739	5.46996	2.7558	2.90766	3.1223	1.67725	0.0173062	Methyltransferase-like protein (AHRD V3.3 *** K4B0N3_SOLLC)
Solyc01g098540.3	SL3.0ch01	88907368	88907817	UTR3	UTR3	UTR3	10.7499	8.51642	9.27146	6.16088	6.47767	5.4509	1.5776	0.0196119	Sec-independent translocase protein TatB (AHRD V3.3 *-* A0A0B0MGL5_GOSAR)
Solyc01g098560.3	SL3.0ch01	88928395	88928663	LastIntron	LastExon	Intergenic	14.5258	10.5401	12.0129	6.92943	7.92476	6.65266	1.72404	0.0360644	Sugar facilitator protein 8
Solyc01g098610.3	SL3.0ch01	88955012	88955406	Exon10	UTR3	UTR3	7.17612	5.75092	6.97746	4.02523	4.59097	4.01041	1.57639	0.0194817	glutathione synthetase 2
Solyc01g098640.3	SL3.0ch01	88973057	88973686	Exon3	Exon3	UTR3	4.53199	4.03305	4.7907	1.79468	1.99067	1.70104	2.43434	0.00309631	Thylakoid lumen 18.3 kDa protein (AHRD V3.3 *** A0A061F263_THECC)
Solyc01g098645.1	SL3.0ch01	88973057	88973686	LastExon	UTR3	UTR3	4.53199	4.03305	4.7907	1.79468	1.99067	1.70104	2.43434	0.00309631	GDSL esterase/lipase (AHRD V3.3 *** W9SXJ5_9ROSA)
Solyc01g098990.3	SL3.0ch01	89227266	89227733	LastExon	LastExon	UTR3	6.37776	5.20303	6.72166	4.19702	4.06516	3.73996	1.52493	0.035925	DUF1995 domain protein, putative (DUF1995) (AHRD V3.3 *** AT5G27560.4)
Solyc01g099450.3	SL3.0ch01	89575519	89575784	LastExon	LastExon	UTR3	14.0836	9.69425	13.6424	1.88121	4.96883	3.99528	3.45037	0.00908232	ATP-dependent DNA helicase Q-like SIM (AHRD V3.3 *-* W9S050_9ROSA)
Solyc01g099690.3	SL3.0ch01	89741191	89741623	LastIntron	UTR3	UTR3	10.7443	8.77197	11.2498	6.58105	6.40564	5.87444	1.63119	0.0271578	ATP-dependent Clp protease proteolytic subunit (AHRD V3.3 *** K4B103_SOLLC)
Solyc01g099715.1	SL3.0ch01	89762563	89763111	LastIntron	LastExon	UTR3	8.32022	6.62601	8.41535	5.24103	5.35246	4.39523	1.55861	0.0235967	F-actin capping protein alpha subunit (AHRD V3.3 *** B9I7I3_POPTR)
Solyc01g099730.3	SL3.0ch01	89769572	89769966	LastExon	LastExon	UTR3	5.45713	4.481	6.02347	3.6516	3.20332	3.30144	1.57159	0.0406477	transmembrane protein (AHRD V3.3 *** AT2G41945.1)
Solyc01g099800.3	SL3.0ch01	89825583	89825998	LastIntron	LastIntron	LastExon	9.50549	7.98676	9.85813	5.67919	5.90362	5.07889	1.64151	0.0139927	P-loop containing nucleoside triphosphate hydrolases superfamily protein (AHRD V3.3 --* AT2G47330.1)
Solyc01g100080.3	SL3.0ch01	90047822	90048384	LastExon	LastExon	UTR3	11.7416	8.50742	10.9498	5.84339	5.07412	4.24812	2.05721	0.0176732	Single-stranded DNA-binding protein (AHRD V3.3 *** G7I9F0_MEDTR)
Solyc01g100290.3	SL3.0ch01	90248218	90248675	UTR3	UTR3	LastIntron	7.44645	7.2371	7.91983	4.22302	3.55664	3.44716	2.01334	0.000329562	GPI-anchored adhesin-like protein (AHRD V3.3 *** AT5G26910.2)
Solyc01g100360.3	SL3.0ch01	90294103	90294509	LastIntron	UTR3	UTR3	14.199	11.2508	14.2046	7.97923	8.24349	6.70853	1.72927	0.0160363	Dihydrolipoyl dehydrogenase (AHRD V3.3 *** A0A103XB80_CYNCS)
Solyc01g100520.3	SL3.0ch01	90404360	90404732	LastExon	UTR3	Intergenic	5.22852	4.59139	5.16807	3.10174	3.5574	2.60219	1.61834	0.00650129	Clp protease 2 proteolytic subunit
Solyc01g100610.3	SL3.0ch01	90468091	90468489	LastExon	UTR3	UTR3	9.65865	8.78445	10.3392	6.11183	7.19608	5.33914	1.54353	0.00925073	Solute carrier family 40 member 3 (AHRD V3.3 *** W9R2S5_9ROSA)
Solyc01g100690.3	SL3.0ch01	90541845	90542150	UTR3	UTR3	UTR3	3.93278	4.13103	3.92844	2.40142	3.12531	2.41596	1.50985	0.0231971	Transmembrane protein, putative (AHRD V3.3 *** A0A072VMF3_MEDTR)
Solyc01g100700.3	SL3.0ch01	90541845	90542150	LastIntron	UTR3	UTR3	3.93278	4.13103	3.92844	2.40142	3.12531	2.41596	1.50985	0.0231971	IGR motif protein (AHRD V3.3 *** AT3G05810.2)
Solyc01g100740.3	SL3.0ch01	90583948	90584293	LastExon	LastExon	UTR3	17.0701	13.1673	16.9556	8.76367	8.08469	7.89903	1.90699	0.0242834	Metallopeptidase M24 family protein (AHRD V3.3 *** AT1G09300.1)
Solyc01g100820.3	SL3.0ch01	90622546	90623037	LastExon	UTR3	UTR3	6.9583	5.31786	7.51441	4.42868	3.63672	3.98939	1.64172	0.0472629	AP-3 complex subunit mu (AHRD V3.3 *** AP3M_ARATH)
Solyc01g100850.3	SL3.0ch01	90640403	90640813	LastExon	LastExon	UTR3	5.31076	4.48378	5.27059	2.91305	3.35545	2.58152	1.70227	0.00452973	ABC transporter family protein (AHRD V3.3 *** A0A097P9U5_HEVBR)
Solyc01g102490.3	SL3.0ch01	91164367	91164942	UTR3	UTR3	UTR3	11.6357	9.22673	10.9688	6.74817	7.7888	6.07678	1.54418	0.0164618	NADPH:adrenodoxin oxidoreductase, mitochondrial (AHRD V3.3 *** M1BK29_SOLTU)
Solyc01g102840.3	SL3.0ch01	91412863	91413138	UTR3	UTR3	UTR3	6.67984	5.81841	6.0783	4.05751	4.00736	3.37568	1.62375	0.00229514	TIR-NBS-LRR class disease resistance protein (AHRD V3.3 *** A2I7Q5_9ROSI)
Solyc01g102990.3	SL3.0ch01	91530250	91530643	LastIntron	LastExon	UTR3	17.3002	13.2353	18.3404	10.0229	10.5776	8.76027	1.66467	0.041025	ATP-dependent clp protease ATP-binding subunit clpx, putative (AHRD V3.3 *** B9SPA4_RICCO)
Solyc01g103020.3	SL3.0ch01	91571812	91572141	LastExon	LastExon	UTR3	4.74241	4.04139	5.4494	3.03013	3.21632	2.62046	1.6052	0.0326706	Survival of motor neuron-related-splicing factor 30 (AHRD V3.3 *** W9RZU2_9ROSA)
Solyc01g103110.3	SL3.0ch01	91657520	91657896	LastIntron	LastExon	UTR3	9.33038	7.50268	9.12414	4.73909	5.92078	4.31777	1.73306	0.00892512	Acyl-CoA N-acyltransferase (AHRD V3.3 *** A0A118K6R4_CYNCS)
Solyc01g103120.3	SL3.0ch01	91657520	91657896	UTR3	UTR3	UTR3	9.33038	7.50268	9.12414	4.73909	5.92078	4.31777	1.73306	0.00892512	Dynamin family protein (AHRD V3.3 *-* B9N0H6_POPTR)
Solyc01g103760.3	SL3.0ch01	92173932	92174204	UTR3	UTR3	UTR3	6.59827	5.15928	5.55895	3.07466	3.26194	2.83796	1.88745	0.0178725	magnesium transporter NIPA (DUF803) (AHRD V3.3 *** AT4G13800.8)
Solyc01g103770.3	SL3.0ch01	92173932	92174204	LastExon	UTR3	UTR3	6.59827	5.15928	5.55895	3.07466	3.26194	2.83796	1.88745	0.0178725	Cyclin-C1-1 (AHRD V3.3 --* A0A0K9NU96_ZOSMR)
Solyc01g103990.3	SL3.0ch01	92353430	92353786	LastExon	UTR3	UTR3	2.40891	2.69186	2.51978	1.47842	1.60923	1.2882	1.7415	0.00102956	T-complex protein 11 (AHRD V3.3 *** U5GGZ4_POPTR)
Solyc01g104130.3	SL3.0ch01	92495538	92495772	LastExon	LastExon	Intergenic	2.81044	2.45307	2.8204	1.55845	1.45661	1.16395	1.93441	0.00153366	2-oxoglutarate (2OG) and Fe(II)-dependent oxygenase-like protein (AHRD V3.3 *** G5DX62_SILLA)
Solyc01g104240.3	SL3.0ch01	92585633	92586012	UTR3	UTR3	Intergenic	4.52386	4.29514	4.69196	2.78398	3.05479	2.66143	1.58949	0.000517585	Hydroxyproline-rich glycoprotein family protein, putative (AHRD V3.3 *** A0A061DX06_THECC)
Solyc01g104250.3	SL3.0ch01	92586179	92586763	LastIntron	UTR3	UTR3	8.60406	7.57826	8.87548	5.38895	6.06782	4.97332	1.52512	0.0054531	Rhomboid-like protein (AHRD V3.3 *** K4B200_SOLLC)
Solyc01g104250.3	SL3.0ch01	92585633	92586012	UTR3	UTR3	UTR3	4.52386	4.29514	4.69196	2.78398	3.05479	2.66143	1.58949	0.000517585	Rhomboid-like protein (AHRD V3.3 *** K4B200_SOLLC)
Solyc01g104370.3	SL3.0ch01	92659044	92659312	LastIntron	Intergenic	Intergenic	6.8989	5.63154	7.34978	4.16698	4.57796	3.60343	1.60995	0.0218627	60S acidic ribosomal protein P1 (AHRD V3.3 *** A0A199VEQ5_ANACO)
Solyc01g104600.3	SL3.0ch01	92946708	92947025	LastExon	Intergenic	Intergenic	6.22914	5.64051	7.24921	3.65933	4.07949	3.01843	1.7773	0.0111953	COP9 signalosome complex subunit 8 (AHRD V3.3 *** A0A1D1XKQ8_9ARAE)
Solyc01g104680.3	SL3.0ch01	92993717	92994001	Intergenic	LastIntron	LastIntron	1.36813	1.66108	1.52033	0.676453	0.698416	0.739466	2.15176	0.00829231	Ran protein/TC4 protein ran2a
Solyc01g104700.3	SL3.0ch01	93004993	93005372	LastExon	Intergenic	Intergenic	3.75358	2.97596	3.84663	2.05387	2.06443	2.15612	1.6856	0.0335908	Ran protein/TC4 protein ran2b
Solyc01g104910.3	SL3.0ch01	93119185	93119424	LastExon	UTR3	UTR3	2.47627	2.14499	2.4335	1.14574	1.02558	1.17842	2.10606	0.00239182	Loricrin-like protein (AHRD V3.3 *** A0A072UZF2_MEDTR)
Solyc01g104920.3	SL3.0ch01	93138047	93138574	LastExon	UTR3	Intergenic	4.76802	4.13416	5.22796	2.65962	2.75584	2.33191	1.82386	0.0121055	AAA-type ATPase family protein (AHRD V3.3 *** AT4G04910.1)
Solyc01g105120.3	SL3.0ch01	93272657	93273091	LastExon	UTR3	UTR3	16.0898	12.6652	16.4981	7.38041	7.47305	6.76886	2.09288	0.0201946	Dentin sialophosphoprotein-related, putative isoform 3 (AHRD V3.3 *** A0A061E394_THECC)
Solyc01g105140.3	SL3.0ch01	93300447	93300888	UTR3	UTR3	UTR3	5.30013	4.70076	5.13048	1.81889	1.76646	1.42876	3.01776	0.000217328	Serine/arginine rich splicing factor, putative (AHRD V3.3 *** B9SZR9_RICCO)
Solyc01g106090.3	SL3.0ch01	93977080	93977469	LastExon	LastExon	UTR3	9.254	7.7588	10.0134	6.64043	5.70441	5.41675	1.52161	0.0245745	PsbP-domain protein 1 (AHRD V3.3 *** A0A0F7GZA5_9ROSI)
Solyc01g106440.3	SL3.0ch01	94234997	94235892	UTR3	UTR3	UTR3	8.43942	6.65236	8.49123	5.30418	5.03041	4.35219	1.60573	0.0238364	S-acyltransferase (AHRD V3.3 *** K4B2L2_SOLLC)
Solyc01g106450.3	SL3.0ch01	94234997	94235892	LastIntron	UTR3	UTR3	8.43942	6.65236	8.49123	5.30418	5.03041	4.35219	1.60573	0.0238364	L-galactose dehydrogenase (AHRD V3.3 *** Q07A10_NICLS)
Solyc01g106470.3	SL3.0ch01	94255178	94255464	LastExon	Intergenic	Intergenic	3.29612	3.6885	3.04763	2.20689	2.42146	1.93439	1.52867	0.00935381	Tunicamycin induced 1 (AHRD V3.3 *** A0A097PPU7_SOLLC)
Solyc01g106480.3	SL3.0ch01	94255178	94255464	UTR3	UTR3	UTR3	3.29612	3.6885	3.04763	2.20689	2.42146	1.93439	1.52867	0.00935381	glyoxisomal malate dehydrogenase
Solyc01g106820.3	SL3.0ch01	94468673	94468926	LastExon	LastExon	UTR3	3.54207	3.10016	3.99699	2.26193	2.74943	1.79982	1.56202	0.0278265	Sterol regulatory element-binding protein site 2 protease, putative (AHRD V3.3 *** B9S7Z4_RICCO)
Solyc01g106880.3	SL3.0ch01	94493618	94493912	LastExon	LastExon	UTR3	11.6764	11.2326	13.5514	5.40047	6.88484	6.15228	1.97751	0.00398347	Ribosomal RNA small subunit methyltransferase E (AHRD V3.3 *** A0A0B2P1K7_GLYSO)
Solyc01g106940.3	SL3.0ch01	94532227	94532563	Intron5	Intron5	Intron5	11.6847	8.76951	11.5387	7.31811	7.64433	6.10667	1.51847	0.0428998	Myb transcription factor (AHRD V3.3 *-* A0A072VG04_MEDTR)
Solyc01g107250.3	SL3.0ch01	94758112	94758402	LastIntron	UTR3	UTR3	7.08974	5.90014	7.71285	4.72424	4.33568	3.55924	1.64058	0.0182071	Leucine-rich repeat receptor-like protein kinase family (AHRD V3.3 *** A0A0K9P218_ZOSMR)
Solyc01g107280.3	SL3.0ch01	94780915	94781307	Intron1	Intron1	Intron1	3.83398	3.17174	3.54506	1.77265	1.96983	1.64241	1.95933	0.00436985	Late embryogenesis abundant protein Lea5, putative (AHRD V3.3 *** A0A061E251_THECC)
Solyc01g107290.3	SL3.0ch01	94780915	94781307	LastExon	LastExon	UTR3	3.83398	3.17174	3.54506	1.77265	1.96983	1.64241	1.95933	0.00436985	RING-H2 finger protein
Solyc01g107300.3	SL3.0ch01	94786475	94786814	UTR3	UTR3	UTR3	6.09411	5.35918	5.67237	3.90494	4.09363	3.24685	1.5229	0.0046473	Protein phosphatase 2C family protein (AHRD V3.3 *** AT4G33920.1)
Solyc01g107330.3	SL3.0ch01	94790542	94790874	UTR3	UTR3	UTR3	5.33765	5.63739	6.20902	3.36449	3.51646	2.79757	1.77548	0.00191465	SWIB_MDM2 domain protein
Solyc01g107370.3	SL3.0ch01	94832739	94833178	UTR3	UTR3	UTR3	4.39928	3.66989	4.18633	2.59207	2.35902	2.18972	1.71626	0.00570947	Gibberellin-regulated protein (AHRD V3.3 *** K0E174_POPTO)
Solyc01g107380.3	SL3.0ch01	94832739	94833178	Exon6	UTR3	UTR3	4.39928	3.66989	4.18633	2.59207	2.35902	2.18972	1.71626	0.00570947	MAR-binding filament-like protein 1 isoform 1 (AHRD V3.3 *** A0A061E182_THECC)
Solyc01g108010.3	SL3.0ch01	95285192	95285592	UTR3	UTR3	UTR3	9.24888	7.53598	9.56436	5.3519	5.80032	5.47694	1.58452	0.0312091	Endonuclease or glycosyl hydrolase (AHRD V3.3 *** A0A061E1S3_THECC)
Solyc01g108260.3	SL3.0ch01	95519427	95519666	UTR3	UTR3	UTR3	3.00697	2.44999	3.14411	1.58293	1.66805	1.24668	1.91234	0.00915032	TP53RK-binding protein (AHRD V3.3 *** A0A151S6M7_CAJCA)
Solyc01g108400.3	SL3.0ch01	95636448	95636752	UTR3	UTR3	UTR3	2.58994	2.51603	2.75632	0.969107	1.06087	0.847276	2.73256	6.94093e-05	CDPK-related kinase (AHRD V3.3 *** AT3G50530.1)
Solyc01g108410.2	SL3.0ch01	95636448	95636752	Intergenic	Intergenic	Exon1	2.58994	2.51603	2.75632	0.969107	1.06087	0.847276	2.73256	6.94093e-05	Pentatricopeptide repeat-containing protein (AHRD V3.3 *** A0A103XM66_CYNCS)
Solyc01g108660.3	SL3.0ch01	95784057	95784317	Exon13	UTR3	LastIntron	4.73438	4.00031	4.34975	1.86649	2.17931	1.81888	2.23106	0.00196636	N-acetyl-gamma-glutamyl-phosphate reductase (AHRD V3.3 *** S8C8Q1_9LAMI)
Solyc01g108660.3	SL3.0ch01	95783278	95783675	LastIntron	UTR3	Intergenic	11.2078	9.83014	11.4643	6.66927	7.24726	5.92741	1.63789	0.00344586	N-acetyl-gamma-glutamyl-phosphate reductase (AHRD V3.3 *** S8C8Q1_9LAMI)
Solyc01g109170.3	SL3.0ch01	96131418	96131994	LastExon	LastExon	UTR3	1.96989	1.78717	2.16649	0.781847	0.702768	0.847433	2.54006	0.00378214	WCOR413-like plant cold acclimation protein
Solyc01g109180.3	SL3.0ch01	96131418	96131994	Exon16	UTR3	UTR3	1.96989	1.78717	2.16649	0.781847	0.702768	0.847433	2.54006	0.00378214	Long-Chain Acyl-CoA Synthetase (AHRD V3.3 *** A0A0G2SJ83_SALMI)
Solyc01g109970.3	SL3.0ch01	96711005	96711377	LastIntron	LastIntron	LastIntron	4.28796	4.18316	4.3861	2.64199	2.9661	2.41692	1.60214	0.00483104	SNF2 domain-containing protein / helicase domain-containing protein (AHRD V3.3 *** AT2G16390.2)
Solyc01g109980.3	SL3.0ch01	96711005	96711377	LastExon	UTR3	UTR3	4.28796	4.18316	4.3861	2.64199	2.9661	2.41692	1.60214	0.00483104	BEL1-related homeotic protein 30 (AHRD V3.3 *** Q8LLD8_SOLTU)
Solyc01g110060.3	SL3.0ch01	96771989	96772311	LastExon	UTR3	Intergenic	8.21787	6.60632	7.62426	3.39355	3.4228	2.59942	2.38413	0.00325349	Purple acid phosphatase (AHRD V3.3 *** A0A0V0IAA9_SOLCH)
Solyc01g110450.3	SL3.0ch01	97067842	97068215	LastIntron	LastIntron	LastIntron	13.7152	11.1685	13.9988	8.73596	9.48187	7.37484	1.51928	0.0195688	NADP dependent sorbitol 6-phosphate dehydrogenase family protein (AHRD V3.3 *** B9HRF0_POPTR)
Solyc01g110460.3	SL3.0ch01	97067842	97068215	LastExon	UTR3	Intergenic	13.7152	11.1685	13.9988	8.73596	9.48187	7.37484	1.51928	0.0195688	3-oxo-5-alpha-steroid 4-dehydrogenase family protein (AHRD V3.3 *** B9H0Y7_POPTR)
Solyc01g111040.3	SL3.0ch01	97364750	97365093	LastExon	Intergenic	Intergenic	4.66557	4.03942	4.91988	2.97594	3.22358	2.51155	1.56409	0.00912577	Calcium-binding EF hand family protein (AHRD V3.3 *** B9HRC2_POPTR)
Solyc01g111080.3	SL3.0ch01	97364750	97365093	UTR3	UTR3	UTR3	4.66557	4.03942	4.91988	2.97594	3.22358	2.51155	1.56409	0.00912577	Unknown protein (AHRD V3.3 )
Solyc01g111190.3	SL3.0ch01	97449735	97449989	UTR3	UTR3	UTR3	9.3254	7.3971	7.14365	5.27603	4.28347	5.26024	1.61043	0.0314742	magnesium transporter NIPA (DUF803) (AHRD V3.3 *-* AT3G23870.4)
Solyc01g111455.1	SL3.0ch01	97603930	97604184	UTR3	UTR3	UTR3	6.74038	6.16428	6.1732	3.71917	3.65222	4.27916	1.63751	0.000854007	Proteasome subunit alpha type (AHRD V3.3 *-* A0A151RN76_CAJCA)
Solyc01g111560.3	SL3.0ch01	97706706	97707105	LastExon	LastExon	UTR3	5.6143	4.65464	5.82237	3.34776	3.69997	2.93955	1.61118	0.0134525	Rac-like GTP-binding protein (AHRD V3.3 *** Q1PCH8_SOLCH)
Solyc01g112350.3	SL3.0ch01	98357703	98358161	LastExon	LastExon	UTR3	10.0432	8.69813	10.8828	5.38217	5.98849	5.29233	1.77784	0.0135062	Brefeldin A-inhibited guanine nucleotide-exchange protein 2 (AHRD V3.3 *** A0A0B2R8L7_GLYSO)
Solyc02g005200.3	SL3.0ch02	7477939	7478214	Exon4	LastIntron	LastIntron	2.40742	2.51137	2.57269	1.33192	1.34476	1.21382	1.92559	5.46553e-05	RNA binding protein (AHRD V3.3 *** AT3G08010.1)
Solyc02g005310.2	SL3.0ch02	8042452	8043052	Intron3	Intron3	Intron3	20.0644	16.2019	21.7102	6.45176	7.37004	5.67795	2.97319	0.0106663	DNA glycosylase (AHRD V3.3 *** A0A103X5G9_CYNCS)
Solyc02g014170.3	SL3.0ch02	15726691	15727041	UTR3	UTR3	LastIntron	5.2499	4.48564	5.44309	3.56526	3.1462	3.39416	1.502	0.0171252	RING/U-box superfamily protein (AHRD V3.3 --* AT2G38195.1)
Solyc02g021020.3	SL3.0ch02	21793020	21793280	UTR3	UTR3	UTR3	9.23418	7.13381	8.52208	5.38634	6.11883	4.70305	1.53565	0.0226859	Pentatricopeptide repeat-containing protein, putative (AHRD V3.3 *** B9SMD1_RICCO)
Solyc02g024050.3	SL3.0ch02	25351120	25351405	LastExon	LastExon	UTR3	7.39987	7.26877	7.27596	4.37467	4.49932	3.5558	1.76548	0.00761337	Ferredoxin--NADP reductase (AHRD V3.3 *** K4B553_SOLLC)
Solyc02g030230.3	SL3.0ch02	25810648	25810887	LastExon	UTR3	UTR3	5.77154	4.83568	5.58846	1.53047	1.98077	1.50567	3.22821	0.00127787	UDP-glucose 4-epimerase, putative (AHRD V3.3 *** B9SV82_RICCO)
Solyc02g030250.3	SL3.0ch02	25930410	25930864	LastExon	UTR3	Intergenic	9.6913	7.87255	10.3818	5.44659	5.50381	5.00084	1.75194	0.0288334	Coatomer epsilon subunit (AHRD V3.3 *** AT1G30630.1)
Solyc02g031850.1	SL3.0ch02	27567758	27568184	LastExon	Intergenic	Intergenic	8.32808	7.2512	8.27169	5.37446	5.29202	4.60576	1.56172	0.00382663	Protein kinase family protein (AHRD V3.3 *-* O64768_ARATH)
Solyc02g031970.1	SL3.0ch02	27708133	27708539	LastExon	Intergenic	Intergenic	3.76897	3.54147	3.81237	2.32221	2.41745	2.13641	1.61761	0.000275023	50S ribosomal protein L7/L12 (AHRD V3.3 *** A0A0B2SQD1_GLYSO)
Solyc02g031980.3	SL3.0ch02	27726183	27726452	UTR3	UTR3	UTR3	6.92271	6.27612	6.8769	4.46897	4.97251	3.38482	1.5652	0.0217185	urease accessory protein D
Solyc02g036270.3	SL3.0ch02	30965955	30966318	UTR3	UTR3	UTR3	10.7403	7.36488	10.8337	4.92076	4.8308	4.04404	2.09769	0.0408994	Disease resistance protein (NBS-LRR class) family (AHRD V3.3 *-* AT5G38350.1)
Solyc02g036280.3	SL3.0ch02	30965955	30966318	LastIntron	LastIntron	LastIntron	10.7403	7.36488	10.8337	4.92076	4.8308	4.04404	2.09769	0.0408994	Pvr4 (AHRD V3.3 *-* A0A1D5AHY8_CAPAN)
Solyc02g036290.3	SL3.0ch02	30965955	30966318	Intron4	UTR3	UTR3	10.7403	7.36488	10.8337	4.92076	4.8308	4.04404	2.09769	0.0408994	malonyl-CoA decarboxylase family protein (AHRD V3.3 *-* AT4G04320.2)
Solyc02g050210.2	SL3.0ch02	4419705	4419955	UTR3	LastIntron	LastIntron	10.6992	9.20998	11.0881	5.10613	5.60394	4.54009	2.03259	0.00366174	Breast cancer type 2 susceptibility (AHRD V3.3 *** A0A0B0P9I0_GOSAR)
Solyc02g061790.3	SL3.0ch02	33853430	33853738	LastIntron	LastExon	Intergenic	12.5081	12.2232	12.698	7.22454	7.69205	5.8943	1.79854	0.00649128	RNA polymerase II transcriptional coactivator (AHRD V3.3 *** G7JC59_MEDTR)
Solyc02g062350.3	SL3.0ch02	34497892	34498263	LastExon	UTR3	UTR3	6.15069	4.8053	5.81065	3.5443	3.70293	3.25307	1.59678	0.0261598	DnaJ, mitochondrial (AHRD V3.3 *** A0A0B0PT99_GOSAR)
Solyc02g062540.3	SL3.0ch02	34791457	34791978	LastIntron	UTR3	UTR3	14.417	11.5539	15.3454	9.64763	8.98895	7.76204	1.56509	0.0315599	Thioredoxin domain-containing protein, putative (AHRD V3.3 *** B9S6A8_RICCO)
Solyc02g063020.2	SL3.0ch02	35590248	35590570	LastExon	LastExon	UTR3	6.67769	5.1255	5.99128	4.05751	3.61509	2.63503	1.72634	0.0155169	Major facilitator superfamily transporter (AHRD V3.3 *** A0A0K9PQR0_ZOSMR)
Solyc02g063060.3	SL3.0ch02	35643619	35643927	LastExon	UTR3	UTR3	14.0709	10.5356	13.5421	6.01731	6.82849	6.05347	2.01852	0.0231127	Zinc-finger domain of monoamine-oxidase A repressor R1 protein (AHRD V3.3 *** AT5G38690.2)
Solyc02g063490.3	SL3.0ch02	36110418	36110748	LastIntron	UTR3	UTR3	4.03775	3.80277	3.77469	2.59068	2.50654	2.34365	1.561	0.000256217	Malate dehydrogenase (AHRD V3.3 *** K4B6N4_SOLLC)
Solyc02g064595.1	SL3.0ch02	36296341	36296586	LastExon	Intergenic	Intergenic	9.93573	8.32438	9.46574	6.12847	5.68866	5.4294	1.60762	0.00926987	Myb transcription factor (AHRD V3.3 *-* A0A072VG04_MEDTR)
Solyc02g064595.1	SL3.0ch02	36295611	36296189	Intron21	LastIntron	LastIntron	15.181	12.1728	15.62	9.17156	10.0931	8.62222	1.54101	0.030189	Myb transcription factor (AHRD V3.3 *-* A0A072VG04_MEDTR)
Solyc02g064630.3	SL3.0ch02	36296341	36296586	UTR3	UTR3	LastIntron	9.93573	8.32438	9.46574	6.12847	5.68866	5.4294	1.60762	0.00926987	Myb transcription factor (AHRD V3.3 *** A0A072VG04_MEDTR)
Solyc02g064630.3	SL3.0ch02	36295611	36296189	Intron7	UTR3	UTR3	15.181	12.1728	15.62	9.17156	10.0931	8.62222	1.54101	0.030189	Myb transcription factor (AHRD V3.3 *** A0A072VG04_MEDTR)
Solyc02g064640.3	SL3.0ch02	36295611	36296189	UTR3	UTR3	UTR3	15.181	12.1728	15.62	9.17156	10.0931	8.62222	1.54101	0.030189	Adenylyl-sulfate kinase (AHRD V3.3 *** K4B6Q1_SOLLC)
Solyc02g064640.3	SL3.0ch02	36296341	36296586	LastExon	UTR3	UTR3	9.93573	8.32438	9.46574	6.12847	5.68866	5.4294	1.60762	0.00926987	Adenylyl-sulfate kinase (AHRD V3.3 *** K4B6Q1_SOLLC)
Solyc02g065790.3	SL3.0ch02	37501931	37502141	UTR3	UTR3	UTR3	6.94692	6.45778	5.95499	3.56248	3.96066	3.38642	1.77456	0.00253676	Haloacid dehalogenase-like hydrolase (HAD) superfamily protein (AHRD V3.3 *-* AT3G29760.5)
Solyc02g066830.3	SL3.0ch02	37557366	37557733	LastExon	LastExon	UTR3	10.8805	8.19889	10.302	5.40135	6.02529	5.09728	1.77811	0.0248034	Nuclear transport factor 2 family protein with RNA binding domain isoform 2 (AHRD V3.3 *** A0A061EH36_THECC)
Solyc02g066930.3	SL3.0ch02	37753969	37754335	LastExon	LastExon	UTR3	6.55473	6.29543	6.50192	2.92918	3.25852	2.90234	2.12893	4.25149e-05	RNA-binding protein (AHRD V3.3 *** Q941H9_TOBAC)
Solyc02g066940.3	SL3.0ch02	37753969	37754335	UTR3	UTR3	UTR3	6.55473	6.29543	6.50192	2.92918	3.25852	2.90234	2.12893	4.25149e-05	Protein RIK-like protein (AHRD V3.3 *** A0A0B0MTZ1_GOSAR)
Solyc02g067060.3	SL3.0ch02	37862393	37862767	UTR3	UTR3	UTR3	8.28362	6.80095	7.28235	2.25446	3.16	2.79612	2.72416	0.00183774	Hexosyltransferase (AHRD V3.3 *** K4B738_SOLLC)
Solyc02g067210.3	SL3.0ch02	37963466	37963793	UTR3	UTR3	Intergenic	6.62842	5.63056	6.45799	2.94353	3.21513	2.60655	2.13537	0.00203971	RNA-binding KH domain-containing protein
Solyc02g067470.3	SL3.0ch02	38229810	38230122	LastExon	UTR3	UTR3	8.19228	6.47865	7.97299	3.4548	3.90631	2.962	2.19352	0.00675224	Hypersensitive-induced response protein (AHRD V3.3 *** A6YGE4_CARPA)
Solyc02g067520.3	SL3.0ch02	38256971	38257619	UTR5	UTR3	UTR3	3.28914	2.83544	3.20538	1.80076	1.91754	1.45424	1.80375	0.00214931	Unknown protein (AHRD V3.3 )
Solyc02g067580.3	SL3.0ch02	38308149	38308495	LastIntron	LastExon	UTR3	5.31395	4.96333	5.50028	2.51595	2.92856	2.21145	2.06082	0.000694165	B12D (AHRD V3.3 *** D2XQY6_WOLAR)
Solyc02g067975.1	SL3.0ch02	38607883	38608360	Exon1	LastIntron	LastIntron	6.6808	5.32715	6.893	4.19999	4.00015	3.55286	1.60818	0.0273465	Acetyl-coenzyme A carboxylase carboxyl transferase subunit beta, chloroplastic (AHRD V3.3 --* A0A0M4B472_9ARAE)
Solyc02g068340.3	SL3.0ch02	38867393	38867682	LastExon	UTR3	UTR3	6.1873	5.42766	5.77871	3.76241	4.29383	3.46846	1.50925	0.00401037	Kinesin-like protein (AHRD V3.3 *** O24147_TOBAC)
Solyc02g068360.3	SL3.0ch02	38887484	38887882	LastExon	UTR3	UTR3	6.19769	6.1618	6.57494	4.20253	4.70244	3.55312	1.51985	0.0133848	Phospholipid/glycerol acyltransferase family protein (AHRD V3.3 *** G7L7V8_MEDTR)
Solyc02g068480.3	SL3.0ch02	38984672	38984957	LastExon	UTR3	UTR3	7.2689	5.72181	7.49729	3.70304	3.97692	3.63208	1.81117	0.0281508	Ubiquitin carboxyl-terminal hydrolase (AHRD V3.3 *** G7JRQ3_MEDTR)
Solyc02g068710.3	SL3.0ch02	39207222	39207501	LastIntron	LastExon	UTR3	13.1235	10.672	12.5319	8.04516	7.88723	6.28529	1.63507	0.00855701	Sulfiredoxin (AHRD V3.3 *** K4B7K3_SOLLC)
Solyc02g068780.3	SL3.0ch02	39267636	39267887	Intron5	Intron5	Intron5	7.16851	7.42164	8.0022	4.99835	5.0977	2.96531	1.72971	0.0330866	DCD (Development and Cell Death) domain protein (AHRD V3.3 *-* AT2G35140.6)
Solyc02g068930.3	SL3.0ch02	39393686	39394028	LastExon	UTR3	UTR3	10.0322	9.17792	10.0499	5.3094	4.87856	4.39414	2.00657	0.000244053	Cytochrome c6 (AHRD V3.3 *** D7MKY9_ARALL)
Solyc02g069120.3	SL3.0ch02	39641558	39641844	LastExon	UTR3	UTR3	14.6481	10.6964	14.6583	7.60985	8.58796	6.90503	1.73151	0.0378741	Zinc finger ZPR1 protein (AHRD V3.3 *** A0A191VKH4_SOLTU)
Solyc02g069380.3	SL3.0ch02	39857878	39858199	LastExon	UTR3	Intergenic	7.86217	7.09934	7.79396	4.68708	5.98387	3.99117	1.55199	0.029647	Membrane fusion protein Use1 (AHRD V3.3 *** AT3G55600.2)
Solyc02g069570.3	SL3.0ch02	39993618	39994001	UTR3	UTR3	UTR3	3.3954	3.15624	3.26301	1.7858	2.35443	1.75076	1.66604	0.0137081	Pentatricopeptide repeat-containing protein, putative (AHRD V3.3 *** B9T6B9_RICCO)
Solyc02g069580.3	SL3.0ch02	39993618	39994001	LastExon	UTR3	UTR3	3.3954	3.15624	3.26301	1.7858	2.35443	1.75076	1.66604	0.0137081	UDP-glucose 4-epimerase, putative (AHRD V3.3 *** B9SV82_RICCO)
Solyc02g069770.3	SL3.0ch02	40163940	40164187	LastExon	LastExon	UTR3	10.3573	8.06683	11.8739	5.07823	4.43722	4.48551	2.164	0.0352891	WD40-repeat domain-contaning protein
Solyc02g070330.3	SL3.0ch02	40669373	40669721	Exon5	Intron5	Intron5	5.80935	4.36828	6.34121	3.53724	3.27443	2.81947	1.71515	0.0472494	40S ribosomal protein S4 (AHRD V3.3 *-* RS4_SOLTU)
Solyc02g070330.3	SL3.0ch02	40673301	40673606	Exon9	Intron9	Intron9	3.30095	3.02063	3.50994	2.1132	2.39876	1.69648	1.58357	0.0109879	40S ribosomal protein S4 (AHRD V3.3 *-* RS4_SOLTU)
Solyc02g070510.3	SL3.0ch02	40810333	40810827	LastIntron	LastExon	UTR3	8.21776	6.85109	8.74993	5.45804	5.39712	4.88138	1.5136	0.0315511	Proteasome subunit alpha type (AHRD V3.3 *** M1BWH6_SOLTU)
Solyc02g070780.3	SL3.0ch02	40955110	40955410	LastExon	UTR3	UTR3	6.41522	5.81899	6.96777	3.50588	4.6756	3.49449	1.64457	0.00869447	DNA helicase (AHRD V3.3 *** K4B859_SOLLC)
Solyc02g071200.3	SL3.0ch02	41249549	41249848	Intron9	Intron9	Intron9	10.4728	8.51522	11.0061	6.20369	7.08692	6.0627	1.54982	0.0284518	Carboxyl-terminal-processing protease (AHRD V3.3 *** A0A0B2PB29_GLYSO)
Solyc02g072105.1	SL3.0ch02	41965290	41965585	LastExon	LastExon	UTR3	21.8479	14.5203	22.6464	7.58271	7.76504	7.69252	2.56137	0.0434401	Dihydroorotase, mitochondrial, putative (AHRD V3.3 *** B9RVX9_RICCO)
Solyc02g072120.3	SL3.0ch02	41965869	41966157	UTR3	UTR3	UTR3	12.8682	10.4529	14.0832	7.41509	7.71474	6.08371	1.76323	0.021978	ER lumen protein-retaining receptor (AHRD V3.3 *** K4B8I6_SOLLC)
Solyc02g075630.2	SL3.0ch02	42347356	42347658	LastIntron	UTR3	UTR3	6.79892	6.28805	6.87052	4.03301	4.50873	3.35075	1.67816	0.00535736	UPF0183 protein (AHRD V3.3 *-* A0A0B2RUE4_GLYSO)
Solyc02g076720.3	SL3.0ch02	42412331	42412699	UTR3	UTR3	UTR3	4.4928	4.25592	4.30796	2.31725	2.14323	1.98842	2.02464	8.40539e-05	Phosphoribosylformylglycinamidine synthase family protein (AHRD V3.3 *** B9HT78_POPTR)
Solyc02g076870.3	SL3.0ch02	42561903	42562377	LastIntron	LastExon	Intergenic	14.6964	11.7175	14.8692	8.47438	8.77635	7.36503	1.6771	0.0199145	Alpha/beta-hydrolase superfamily protein (AHRD V3.3 *** G7LIR3_MEDTR)
Solyc02g076880.3	SL3.0ch02	42561903	42562377	UTR3	UTR3	Intergenic	14.6964	11.7175	14.8692	8.47438	8.77635	7.36503	1.6771	0.0199145	Heavy metal transport/detoxification superfamily protein (AHRD V3.3 *** A0A061GDN8_THECC)
Solyc02g077460.2	SL3.0ch02	42961514	42961809	LastExon	UTR3	UTR3	7.32439	5.67332	7.91983	4.77494	4.52256	3.75425	1.60266	0.0425415	Lipoate-protein ligase B, putative (AHRD V3.3 *** B9SJ07_RICCO)
Solyc02g077600.3	SL3.0ch02	43062132	43062498	LastExon	LastExon	UTR3	14.8105	10.9587	14.2775	6.82927	6.90055	6.67407	1.9627	0.0319019	Guanylate-binding family protein (AHRD V3.3 *** AT5G46070.1)
Solyc02g077610.3	SL3.0ch02	43062132	43062498	UTR3	UTR3	UTR3	14.8105	10.9587	14.2775	6.82927	6.90055	6.67407	1.9627	0.0319019	NAC domain-containing protein (AHRD V3.3 *** A0A060A5P2_BOENI)
Solyc02g078550.3	SL3.0ch02	43776276	43776565	LastExon	UTR3	UTR3	1.50265	1.5877	1.3583	0.765578	0.840216	0.709882	1.9211	0.00217552	RNA polymerase II C-terminal domain phosphatase-like protein (AHRD V3.3 *** A0A0K9PYY1_ZOSMR)
Solyc02g078640.3	SL3.0ch02	43846759	43847254	LastExon	UTR3	UTR3	9.83104	7.91871	10.5528	5.26862	5.35364	4.63246	1.85533	0.0238791	Protein MOR1 (AHRD V3.3 *** A0A0B2P031_GLYSO)
Solyc02g078790.3	SL3.0ch02	44004076	44004343	UTR3	UTR3	UTR3	3.59347	3.07925	3.16412	2.29089	2.21418	1.98553	1.51555	0.0074492	Transcription factor jumonji domain protein (AHRD V3.3 *** G7I8M9_MEDTR)
Solyc02g078900.3	SL3.0ch02	44085817	44086237	LastIntron	UTR3	UTR3	11.7712	9.49819	12.8391	7.75509	8.18421	6.61712	1.51214	0.0416973	Internal alternative NAD(P)H-ubiquinone oxidoreductase A1, mitochondrial (AHRD V3.3 *** A0A199VZH3_ANACO)
Solyc02g079100.3	SL3.0ch02	44276784	44277257	LastExon	LastExon	Intergenic	10.0289	8.59325	10.3964	4.82312	4.91413	4.19389	2.08299	0.00540452	riboflavin kinase/FMN hydrolase (AHRD V3.3 *** AT4G21470.1)
Solyc02g079970.3	SL3.0ch02	44900756	44901195	LastExon	LastExon	UTR3	4.65881	3.8735	4.60893	3.03996	2.65162	2.79882	1.54778	0.0140873	bHLH transcription factor 014
Solyc02g080150.2	SL3.0ch02	45013857	45014234	Exon1	LastIntron	LastIntron	13.2798	11.1695	14.0039	8.35622	8.07325	6.98528	1.64226	0.0141812	CAI-1 autoinducer sensor kinase/phosphatase cqsS isoform 1 (AHRD V3.3 *-* A0A061DL35_THECC)
Solyc02g080620.3	SL3.0ch02	45368583	45368972	LastIntron	LastExon	UTR3	18.5823	13.7162	19.2943	6.04266	5.58696	3.63207	3.38054	0.0108041	Arogenate dehydratase (AHRD V3.3 *** K4B9T3_SOLLC)
Solyc02g080630.3	SL3.0ch02	45369940	45370323	LastIntron	UTR3	UTR3	8.44435	7.98251	9.43189	5.1805	5.31994	4.56387	1.71656	0.00463726	Lactoylglutathione lyase (AHRD V3.3 *** K4B9T4_SOLLC)
Solyc02g080970.3	SL3.0ch02	45593080	45593506	LastExon	UTR3	UTR3	11.0759	9.76562	12.4014	6.48283	7.26653	5.39089	1.7368	0.00952184	Core-2/I-branching beta-1,6-N-acetylglucosaminyltransferase family protein (AHRD V3.3 *** AT1G62305.1)
Solyc02g080995.1	SL3.0ch02	45624837	45625102	Intron1	Intron1	Intron1	3.17653	2.82496	2.89303	1.64368	1.60477	1.59591	1.83606	0.00558462	Major pollen allergen Aln g 1 (AHRD V3.3 --* MPAG1_ALNGL)
Solyc02g081010.2	SL3.0ch02	45624837	45625102	UTR3	Intergenic	Intergenic	3.17653	2.82496	2.89303	1.64368	1.60477	1.59591	1.83606	0.00558462	Transcription factor jumonji (jmjC) domain-containing protein (AHRD V3.3 *-* AT1G11950.3)
Solyc02g081070.3	SL3.0ch02	45703753	45704075	LastExon	LastExon	UTR3	5.85512	4.72545	5.69742	3.882	3.643	3.2576	1.50965	0.0193194	Kinase (AHRD V3.3 *** D7ME76_ARALL)
Solyc02g081400.3	SL3.0ch02	45940043	45940434	LastExon	UTR3	UTR3	5.76239	4.70581	5.99475	3.00405	3.00208	2.66791	1.89796	0.0167212	Class I glutamine amidotransferase-like superfamily protein (AHRD V3.3 *** AT3G02720.1)
Solyc02g081640.3	SL3.0ch02	46074424	46074820	UTR3	UTR3	UTR3	9.79228	7.44478	9.95302	5.48685	6.33677	5.18035	1.59904	0.0370467	Transcription factor TFIIIB component B (AHRD V3.3 *** A0A0B0N2G5_GOSAR)
Solyc02g081920.3	SL3.0ch02	46247833	46248041	UTR5	UTR5	UTR5	5.67792	5.84087	6.34748	3.74634	3.4366	3.16642	1.72632	0.000783749	plastid transcriptionally active 14 (AHRD V3.3 *** AT4G20130.1)
Solyc02g082760.3	SL3.0ch02	46957911	46958234	LastIntron	UTR3	UTR3	6.01792	5.44108	6.08954	4.05348	3.62822	3.15275	1.6197	0.00302369	ethylene-responsive catalase
Solyc02g083150.3	SL3.0ch02	47209088	47209446	LastExon	UTR3	Intergenic	8.39135	7.09455	8.49087	4.86309	4.70621	3.98966	1.76833	0.00533622	S-acyltransferase (AHRD V3.3 *** K4BAI3_SOLLC)
Solyc02g083390.3	SL3.0ch02	47371004	47371287	LastIntron	UTR3	Intergenic	5.52096	5.69876	5.62824	3.65919	3.68599	3.36303	1.57337	0.000443535	Prolyl 4-hydroxylase alpha subunit, putative (AHRD V3.3 *** B9SXB7_RICCO)
Solyc02g084380.3	SL3.0ch02	48061920	48062125	UTR3	UTR3	UTR3	2.77853	2.68596	2.75523	1.2436	1.26363	1.0886	2.2859	0.000159476	Ribosomal protein S6 (AHRD V3.3 *** A0A103XMX6_CYNCS)
Solyc02g084390.3	SL3.0ch02	48061920	48062125	LastExon	UTR3	UTR3	2.77853	2.68596	2.75523	1.2436	1.26363	1.0886	2.2859	0.000159476	Kinesin-like protein (AHRD V3.3 *** A0A0V0IYV5_SOLCH)
Solyc02g084400.3	SL3.0ch02	48072089	48072375	LastExon	UTR3	UTR3	8.39343	6.70908	8.0149	5.12405	5.71602	3.21698	1.64454	0.0357361	Protein kinase-like (AHRD V3.3 *** Q2HTV1_MEDTR)
Solyc02g084620.3	SL3.0ch02	48339212	48339469	LastExon	Intergenic	Intergenic	8.54406	6.59347	7.91257	3.85042	2.89045	3.16479	2.32696	0.00692228	Forkhead-associated (FHA) domain-containing protein (AHRD V3.3 *-* AT3G54350.5)
Solyc02g084660.3	SL3.0ch02	48389692	48390087	LastIntron	LastExon	UTR3	10.3707	8.3745	10.6628	6.02397	5.8234	4.73691	1.77325	0.0124687	Glutaredoxin (AHRD V3.3 *-* A0A124SH95_CYNCS)
Solyc02g084670.3	SL3.0ch02	48389692	48390087	UTR3	UTR3	Intergenic	10.3707	8.3745	10.6628	6.02397	5.8234	4.73691	1.77325	0.0124687	S-adenosyl-L-methionine-dependent methyltransferases superfamily protein (AHRD V3.3 *** AT3G51070.1)
Solyc02g084750.3	SL3.0ch02	48488279	48488641	LastExon	UTR3	UTR3	10.1227	8.27552	10.9139	5.72985	5.18131	4.19959	1.93982	0.0115374	Radical sam protein, putative (AHRD V3.3 *** B9S686_RICCO)
Solyc02g085230.3	SL3.0ch02	48831731	48832013	LastExon	UTR3	UTR3	15.9964	11.8942	15.2396	8.27731	7.9576	6.08804	1.9321	0.0158313	Nucleolar 6 (AHRD V3.3 *** A0A0B0N3X3_GOSAR)
Solyc02g085570.3	SL3.0ch02	49043907	49044347	LastIntron	LastExon	UTR3	9.87058	7.85605	10.6837	4.91335	4.9597	4.51367	1.97476	0.0280091	Splicing factor u2af large subunit, putative (AHRD V3.3 *-* B9SGJ4_RICCO)
Solyc02g085610.3	SL3.0ch02	49069432	49069857	LastExon	UTR3	Intergenic	14.5088	11.349	15.9669	9.19961	8.37342	7.55742	1.66431	0.0429936	LEGBF4G L.esculentum GBF4G-box binding protein
Solyc02g085670.3	SL3.0ch02	49146082	49146363	Intron4	Intron4	UTR3	6.9684	5.94635	7.56533	4.3765	4.31054	3.96606	1.61858	0.0248208	Major facilitator superfamily transporter (AHRD V3.3 *** A0A0K9PQR0_ZOSMR)
Solyc02g085690.3	SL3.0ch02	49146082	49146363	Exon6	Intron6	Intron6	6.9684	5.94635	7.56533	4.3765	4.31054	3.96606	1.61858	0.0248208	ubiquitin-conjugating enzyme family protein
Solyc02g086050.3	SL3.0ch02	49484256	49484593	LastIntron	LastExon	UTR3	13.0958	9.58885	12.5199	7.44164	7.82551	6.23876	1.63697	0.0361461	Abscisic acid-deficient 4 (AHRD V3.3 *** A0A061EPF5_THECC)
Solyc02g086060.3	SL3.0ch02	49484256	49484593	UTR3	UTR3	UTR3	13.0958	9.58885	12.5199	7.44164	7.82551	6.23876	1.63697	0.0361461	zinc transporter (AHRD V3.3 *** AT5G38380.1)
Solyc02g086440.3	SL3.0ch02	49747882	49748225	UTR3	UTR3	UTR3	8.20947	6.53063	8.16956	3.9354	5.50088	4.40441	1.65524	0.0147214	F-box/LRR protein (AHRD V3.3 *** A0A072TZ55_MEDTR)
Solyc02g086445.1	SL3.0ch02	49747882	49748225	LastIntron	LastExon	Intergenic	8.20947	6.53063	8.16956	3.9354	5.50088	4.40441	1.65524	0.0147214	ERD (early-responsive to dehydration stress) family protein (AHRD V3.3 --* AT1G62320.5)
Solyc02g086500.3	SL3.0ch02	49819120	49819449	LastExon	LastExon	UTR3	8.54677	7.49334	8.55899	5.00196	5.05549	4.60343	1.67787	0.00518609	ARM repeat superfamily protein, putative (AHRD V3.3 *** A0A061EBW7_THECC)
Solyc02g086710.3	SL3.0ch02	49995136	49995463	LastExon	LastExon	UTR3	3.40172	3.18999	3.00446	2.11048	2.3414	1.76496	1.54358	0.00735122	Monodehydroascorbate reductase (NADH)-like protein
Solyc02g086780.3	SL3.0ch02	50036057	50036414	LastIntron	LastExon	UTR3	10.5185	8.20504	10.3153	6.13057	7.17345	5.44473	1.54884	0.0234131	Proteasome assembly chaperone 3 (AHRD V3.3 *** A0A1D1YK33_9ARAE)
Solyc02g087250.3	SL3.0ch02	50341134	50341619	Intron5	Intron5	Intron5	11.1011	8.37559	11.8754	6.51131	5.60666	5.3566	1.79416	0.0380328	Chloroplastic group IIA intron splicing facilitator CRS1, chloroplastic (AHRD V3.3 *** A0A0B0PGC2_GOSAR)
Solyc02g087480.3	SL3.0ch02	50555858	50556155	LastExon	LastExon	UTR3	8.15115	8.29961	7.11546	4.18046	4.58245	3.63206	1.90127	0.00182616	CW14 protein (DUF1336) (AHRD V3.3 *** AT1G59650.1)
Solyc02g087705.1	SL3.0ch02	50666159	50666893	LastIntron	Intergenic	Intergenic	6.89715	5.84814	7.11153	4.41839	4.3608	3.91703	1.56399	0.0152243	Pectate lyase (AHRD V3.3 *-* M0ZLE8_SOLTU)
Solyc02g087710.3	SL3.0ch02	50666159	50666893	LastExon	Intergenic	Intergenic	6.89715	5.84814	7.11153	4.41839	4.3608	3.91703	1.56399	0.0152243	FACT complex subunit SSRP1 (AHRD V3.3 *** SSRP1_VICFA)
Solyc02g087740.3	SL3.0ch02	50691597	50692039	LastExon	LastExon	UTR3	1.74864	2.07269	1.74519	0.747553	0.814624	0.775405	2.38131	0.00840216	2-aminoethanethiol dioxygenase (AHRD V3.3 *** A0A0B0PVN9_GOSAR)
Solyc02g087750.3	SL3.0ch02	50699141	50699438	LastExon	LastExon	UTR3	3.45634	2.96429	3.88964	2.15967	2.17312	1.99794	1.6286	0.0336094	Ubiquitin-conjugating enzyme (AHRD V3.3 *** Q5GMM2_CAPCH)
Solyc02g088010.3	SL3.0ch02	50876713	50877119	Exon9	UTR3	UTR3	5.86157	5.00207	6.80269	3.76241	3.93652	3.53011	1.57327	0.0479639	Defective in cullin neddylation protein (AHRD V3.3 *** K4BBV7_SOLLC)
Solyc02g088610.3	SL3.0ch02	51281683	51282011	LastExon	UTR3	UTR3	6.91994	6.30748	7.23047	3.45127	3.5329	3.08798	2.03113	0.00155169	LeHSP110/ClpB heat shock protein
Solyc02g089100.3	SL3.0ch02	51637495	51637880	UTR3	UTR3	Intergenic	13.5768	11.3309	14.3915	8.02106	8.98378	7.04639	1.63398	0.0142135	TSA: Wollemia nobilis Ref_Wollemi_Transcript_16418_819 transcribed RNA sequence (AHRD V3.3 *** A0A0C9QNI1_9SPER)
Solyc02g089110.3	SL3.0ch02	51637495	51637880	LastIntron	UTR3	UTR3	13.5768	11.3309	14.3915	8.02106	8.98378	7.04639	1.63398	0.0142135	Mitochondrial carrier family protein (AHRD V3.3 *** B9H0H4_POPTR)
Solyc02g089980.3	SL3.0ch02	52309694	52310055	LastExon	LastExon	UTR3	6.29847	5.56448	6.91369	4.33516	4.2934	3.35561	1.56679	0.0118907	electron transporter, putative (Protein of unknown function, DUF547) (AHRD V3.3 *** AT5G66600.9)
Solyc02g090630.3	SL3.0ch02	52820848	52821137	Exon9	Exon10	Exon10	24.2322	17.0021	26.2015	10.1525	12.5778	10.1179	2.05295	0.0449087	Patatin (AHRD V3.3 *** A0A0E0IDC7_ORYNI)
Solyc02g090640.3	SL3.0ch02	52820848	52821137	Exon2	LastExon	LastExon	24.2322	17.0021	26.2015	10.1525	12.5778	10.1179	2.05295	0.0449087	Patatin (AHRD V3.3 *** M1BAE4_SOLTU)
Solyc02g091490.4	SL3.0ch02	53403693	53404038	LastExon	UTR3	UTR3	6.88712	5.60627	6.08024	3.59081	4.10467	2.94182	1.74608	0.00644971	symbol=Frk3
Solyc02g091525.1	SL3.0ch02	53439068	53439566	Exon7	Intron8	Intron9	6.75414	6.02007	6.55792	2.95406	3.70587	2.64515	2.07759	0.00157334	5'-AMP-activated protein kinase subunit beta-1 (AHRD V3.3 *** A0A061EHR2_THECC)
Solyc02g091530.3	SL3.0ch02	53439068	53439566	Exon10	LastIntron	UTR3	6.75414	6.02007	6.55792	2.95406	3.70587	2.64515	2.07759	0.00157334	5'-AMP-activated protein kinase subunit beta-1 (AHRD V3.3 *** A0A061EHR2_THECC)
Solyc02g091560.3	SL3.0ch02	53465857	53466178	LastIntron	UTR3	Intergenic	12.9582	13.6332	16.4359	8.31379	8.27821	7.25974	1.80395	0.0186997	Serine hydroxymethyltransferase (AHRD V3.3 *** A0A0R4J3Y9_SOYBN)
Solyc02g091650.3	SL3.0ch02	53535280	53535547	LastExon	Intergenic	Intergenic	6.78901	5.007	7.10347	3.28289	2.73055	2.38577	2.25015	0.02124	DNA-binding protein, putative (duplicated DUF1399) (AHRD V3.3 *** AT2G22660.3)
Solyc02g091750.3	SL3.0ch02	53616295	53616749	UTR5	UTR5	UTR5	11.3016	9.08463	11.8262	6.45341	6.17424	5.36392	1.79042	0.0191624	60S ribosomal protein L17 (AHRD V3.3 --* RL17_MAIZE)
Solyc02g092700.3	SL3.0ch02	54330514	54330835	LastIntron	UTR3	UTR3	10.0867	7.96092	11.0325	6.42056	6.05272	5.35292	1.63132	0.0420661	DUF1230 family protein (DUF1230) (AHRD V3.3 *** AT5G67370.1)
Solyc02g092830.3	SL3.0ch02	54440274	54440576	LastIntron	UTR3	UTR3	15.4545	11.6725	17.3124	8.7228	6.81117	7.42676	1.93546	0.0384492	caspase-6 protein (AHRD V3.3 *** AT2G15000.7)
Solyc02g093140.3	SL3.0ch02	54693989	54694470	LastIntron	UTR3	UTR3	10.0633	8.93791	12.2331	6.30024	6.59763	5.52389	1.69551	0.0369178	CBS domain-containing protein-like (AHRD V3.3 *** B8AP73_ORYSI)
Solyc02g093520.3	SL3.0ch02	55003373	55003739	UTR3	UTR3	UTR3	4.53078	3.62386	4.52655	2.68576	2.67453	2.42784	1.62827	0.0255429	E3 ubiquitin-protein ligase RGLG2 (AHRD V3.3 *** A0A0B0MQU5_GOSAR)
Solyc02g093810.3	SL3.0ch02	55155366	55155612	UTR3	UTR3	Intergenic	3.98016	3.69261	4.02351	1.95884	2.16686	1.68344	2.01343	0.000545928	HAUS augmin-like complex subunit 6 (AHRD V3.3 *** A0A061ECN9_THECC)
Solyc02g094200.3	SL3.0ch02	55447526	55447968	LastIntron	Intergenic	Intergenic	9.05512	8.24854	9.7011	5.86573	6.48302	4.95272	1.56084	0.00619114	Nuclear transport factor 2 (AHRD V3.3 *** NTF2_ARATH)
Solyc02g094490.3	SL3.0ch02	55641088	55641647	Intron1	LastIntron	LastIntron	9.45314	7.98383	10.1521	6.19604	6.50758	5.43666	1.52087	0.0226208	ATPase E1-E2 type family protein / haloacid dehalogenase-like hydrolase family protein (AHRD V3.3 --* AT1G68710.3)
Solyc02g094500.3	SL3.0ch02	55641088	55641647	LastExon	UTR3	UTR3	9.45314	7.98383	10.1521	6.19604	6.50758	5.43666	1.52087	0.0226208	sialyltransferase-like
Solyc02g094640.3	SL3.0ch02	55880900	55881277	LastExon	LastExon	UTR3	8.75648	7.11763	8.94422	5.60566	5.42962	4.95144	1.55243	0.0268378	Acetyl-coenzyme A synthetase (AHRD V3.3 *** K4BDQ9_SOLLC)
Solyc03g005050.3	SL3.0ch03	46490	46877	Exon4	Exon4	UTR3	4.7727	4.48932	4.86436	3.31272	3.34528	2.7511	1.50135	0.00462745	Adenylate kinase family-like protein (AHRD V3.3 *** Q38JG0_SOLTU)
Solyc03g005060.3	SL3.0ch03	46490	46877	UTR3	UTR3	UTR3	4.7727	4.48932	4.86436	3.31272	3.34528	2.7511	1.50135	0.00462745	nucleolar protein gar2-like protein (AHRD V3.3 *-* AT2G42320.2)
Solyc03g005100.3	SL3.0ch03	73766	74035	Exon2	Exon2	UTR3	6.59669	5.49361	6.19591	3.88519	4.7823	3.38654	1.51702	0.0179801	alpha/beta-Hydrolases superfamily protein (AHRD V3.3 *** AT3G27320.1)
Solyc03g005440.3	SL3.0ch03	334090	334404	UTR3	UTR3	Intergenic	8.44579	7.57535	8.77718	4.0627	5.43293	3.61502	1.89146	0.00628666	Agenet domain protein (AHRD V3.3 *** G7JN46_MEDTR)
Solyc03g005690.3	SL3.0ch03	495289	495507	Intron3	Intron4	Intron4	5.45228	4.98798	5.10109	3.12599	3.78615	3.21646	1.5344	0.00314432	Cysteine-rich repeat secretory protein 3 (AHRD V3.3 *** A0A0B2QTT4_GLYSO)
Solyc03g006280.3	SL3.0ch03	891633	891844	Intron7	UTR3	LastIntron	10.9351	9.17789	10.6684	6.59786	6.79376	6.84303	1.52122	0.0216765	F1K23.23, putative isoform 1 (AHRD V3.3 *** A0A061GM10_THECC)
Solyc03g006640.3	SL3.0ch03	1220866	1221077	UTR3	UTR3	UTR3	2.59217	2.89837	3.04458	1.65251	1.846	1.36737	1.75407	0.00316882	F-box family protein (AHRD V3.3 *** B9H220_POPTR)
Solyc03g007140.3	SL3.0ch03	1733244	1733666	LastExon	Intergenic	Intergenic	10.6592	8.24112	10.4225	6.21137	6.37889	4.94091	1.67261	0.0185084	B3 domain-containing protein (AHRD V3.3 *-* W9S5V1_9ROSA)
Solyc03g007430.3	SL3.0ch03	1969741	1970125	UTR3	UTR3	UTR3	4.62776	4.41	5.17531	1.81921	1.69872	1.67739	2.73575	0.00443789	Mitochondrial carrier protein, putative (AHRD V3.3 *** B9RIM4_RICCO)
Solyc03g007620.3	SL3.0ch03	2168273	2168649	LastExon	LastExon	Intergenic	8.6223	6.44677	9.40324	4.17819	3.60296	3.86237	2.1018	0.0363225	Tic22-like family protein (AHRD V3.3 *** AT5G62650.1)
Solyc03g007900.3	SL3.0ch03	2422532	2422860	LastExon	LastExon	Intergenic	6.38461	5.05054	6.51276	3.49591	3.90096	2.68874	1.77956	0.0130241	Glutaminyl-peptide cyclotransferase-like protein (AHRD V3.3 *** A0A0B0P3U3_GOSAR)
Solyc03g013630.3	SL3.0ch03	45189221	45189528	Exon4	Intron4	Intron4	5.91672	5.31748	6.11429	1.61246	1.53441	1.77897	3.52193	0.00170302	Hexosyltransferase (AHRD V3.3 *** K4BET4_SOLLC)
Solyc03g019810.3	SL3.0ch03	62820672	62821008	LastIntron	UTR3	UTR3	12.6885	10.2075	12.4248	7.06599	8.68534	6.1125	1.61549	0.0146263	Ser/thr phosphatase family protein (AHRD V3.3 *** G7KPP7_MEDTR)
Solyc03g025160.3	SL3.0ch03	2637755	2638055	LastExon	UTR3	UTR3	5.29069	4.34948	5.16818	3.36638	3.44102	3.03469	1.5046	0.0183212	Translational activator gcn1 (AHRD V3.3 *** A0A0B0PG07_GOSAR)
Solyc03g025200.3	SL3.0ch03	2696790	2697064	LastIntron	LastExon	UTR3	12.1819	10.5836	11.9046	6.41006	6.8285	5.70034	1.83063	0.00164944	Multidrug resistance protein mdtK (AHRD V1 **-- MDTK_PHOLL)
Solyc03g025680.3	SL3.0ch03	3142345	3142551	UTR3	UTR3	UTR3	3.61072	3.37736	4.16329	2.28655	2.27563	2.29428	1.6264	0.0254335	PAR1 protein (AHRD V3.3 *** AT5G52390.1)
Solyc03g025690.3	SL3.0ch03	3142345	3142551	UTR3	UTR3	UTR3	3.61072	3.37736	4.16329	2.28655	2.27563	2.29428	1.6264	0.0254335	Chaperone protein DnaJ (AHRD V3.3 *** A0A1D1YJ37_9ARAE)
Solyc03g025840.3	SL3.0ch03	3267068	3267323	LastExon	LastExon	UTR3	2.19763	2.08302	2.01822	1.36394	1.36186	1.16751	1.61787	0.000818423	Cytochrome b561 (AHRD V3.3 *** Q3LGX5_CITLA)
Solyc03g031440.3	SL3.0ch03	4012308	4012514	Exon8	LastIntron	LastExon	1.8189	1.83879	1.75138	0.474125	0.479979	0.493133	3.73752	0.000235103	Quinone reductase family protein (AHRD V3.3 *** AT4G27270.1)
Solyc03g032030.3	SL3.0ch03	4561144	4561485	UTR3	UTR3	UTR3	11.0914	8.45842	12.1457	5.01657	5.43764	5.30046	2.01182	0.0385459	Phosphate carrier protein, mitochondrial (AHRD V3.3 *** A0A0B2RN43_GLYSO)
Solyc03g032050.3	SL3.0ch03	4594411	4594849	LastExon	LastExon	UTR3	5.0997	4.90858	5.74801	3.52836	3.66952	3.00542	1.54423	0.00542111	GTP binding protein (AHRD V3.3 *** AT5G65960.1)
Solyc03g032055.1	SL3.0ch03	4594411	4594849	Intergenic	Intergenic	Intron2	5.0997	4.90858	5.74801	3.52836	3.66952	3.00542	1.54423	0.00542111	TBP-associated factor 4B (AHRD V3.3 --* AT1G27720.4)
Solyc03g033480.3	SL3.0ch03	5057611	5057868	Exon13	Exon13	UTR3	8.95503	7.99075	8.15045	5.72944	5.20283	4.88098	1.58704	0.00153545	S-adenosyl-L-methionine-dependent methyltransferases superfamily protein (AHRD V3.3 *** AT4G35987.1)
Solyc03g033580.3	SL3.0ch03	5167115	5167535	LastIntron	LastExon	UTR3	6.98277	6.20103	6.89108	4.92765	4.46566	3.82823	1.51835	0.00573028	polyamine-modulated factor 1-binding protein (AHRD V3.3 *** AT2G17990.3)
Solyc03g033620.3	SL3.0ch03	5236833	5237447	Intron11	LastExon	UTR3	8.04528	6.69497	8.92063	5.12925	4.77174	4.60062	1.6316	0.0359958	Serine carboxypeptidase S28 family protein (AHRD V3.3 *** AT4G36195.3)
Solyc03g033650.3	SL3.0ch03	5271611	5271883	UTR3	UTR3	UTR3	8.45713	7.22178	8.76389	4.5149	5.93084	4.10771	1.67952	0.011118	altered inheritance of mitochondria protein (AHRD V3.3 *** AT3G51100.1)
Solyc03g043750.3	SL3.0ch03	7322393	7322840	LastExon	LastExon	UTR3	9.24589	7.70813	9.3727	5.67617	6.32753	4.89513	1.5579	0.0112054	NAD(P)H dehydrogenase C1 (AHRD V3.3 *** AT5G08740.1)
Solyc03g043850.3	SL3.0ch03	7542130	7542524	LastIntron	LastExon	UTR3	6.12489	5.58005	7.19798	3.88379	3.76237	3.35414	1.7184	0.0219467	cytochrome c oxidase-like protein (AHRD V3.3 *** AT4G37830.1)
Solyc03g043940.3	SL3.0ch03	7690505	7690777	UTR3	UTR3	UTR3	8.2264	5.75332	8.51286	3.50341	3.58165	3.30307	2.16522	0.0429484	O-methyltransferase, putative (AHRD V3.3 *-* B9SGP1_RICCO)
Solyc03g043960.3	SL3.0ch03	7769872	7770256	LastExon	UTR3	UTR3	9.95842	8.23325	10.9187	6.03335	5.42156	5.49106	1.71783	0.0296173	ADP-ribosylation factor, putative (AHRD V3.3 *** B9T2F5_RICCO)
Solyc03g044370.3	SL3.0ch03	8907636	8908257	UTR3	UTR3	UTR3	22.36	17.4433	23.8302	13.4409	13.4907	11.5809	1.65229	0.0387047	OTU domain-containing protein, putative (AHRD V3.3 *** B9SCB5_RICCO)
Solyc03g045087.1	SL3.0ch03	11518745	11519167	LastIntron	LastIntron	Intergenic	8.83155	7.4561	9.1331	5.44032	5.52291	4.82204	1.61041	0.0139057	LOW QUALITY:HAT family dimerisation domain containing protein (AHRD V3.3 *-* Q2QQT1_ORYSJ)
Solyc03g045090.3	SL3.0ch03	11518745	11519167	LastExon	UTR3	UTR3	8.83155	7.4561	9.1331	5.44032	5.52291	4.82204	1.61041	0.0139057	dihydroflavonol 4-reductase/flavanone protein (AHRD V3.3 *** AT3G02420.1)
Solyc03g046590.3	SL3.0ch03	13203560	13204130	LastIntron	UTR3	UTR3	21.4472	17.4377	20.589	13.2478	12.3145	13.5475	1.52069	0.0229685	AUGMIN subunit 5 (AHRD V3.3 *** AUG5_ARATH)
Solyc03g058350.3	SL3.0ch03	26186483	26186839	UTR3	UTR3	Intergenic	6.58932	5.68216	7.21807	4.25317	4.08266	3.66168	1.62447	0.0193024	Translation initiation factor (AHRD V3.3 *-* G7ID01_MEDTR)
Solyc03g058880.3	SL3.0ch03	28652301	28652988	Exon10	LastExon	UTR3	9.73087	7.78823	10.3355	6.46085	6.73619	4.92581	1.53699	0.0310769	Translation factor GUF1 homolog, mitochondrial (AHRD V3.3 *** K4BGT6_SOLLC)
Solyc03g058920.3	SL3.0ch03	29074226	29074689	LastExon	LastExon	UTR3	7.33986	6.78911	7.18828	4.74262	5.06375	4.00945	1.54296	0.00558356	Mitochondrial outer membrane porin (AHRD V3.3 *** VDAC1_WHEAT)
Solyc03g058930.3	SL3.0ch03	29074226	29074689	UTR3	UTR3	UTR3	7.33986	6.78911	7.18828	4.74262	5.06375	4.00945	1.54296	0.00558356	Hypersensitive-induced response protein (AHRD V3.3 *** Q6UNT3_CUCSA)
Solyc03g058950.3	SL3.0ch03	29218691	29218964	LastExon	UTR3	UTR3	15.4171	11.3616	13.0807	5.62969	6.18923	5.59609	2.28879	0.0214502	Inositol hexakisphosphate and diphosphoinositol-pentakisphosphate kinase (AHRD V3.3 *** A0A0B2PX10_GLYSO)
Solyc03g058970.3	SL3.0ch03	29453712	29454098	LastExon	UTR3	Intergenic	4.7449	4.16743	4.4787	2.79531	3.3056	2.50646	1.55576	0.00687214	Alkaline alpha-galactosidase seed imbibition protein (AHRD V3.3 *** Q8H6N3_SOLLC)
Solyc03g059150.3	SL3.0ch03	30064364	30064827	LastExon	Intergenic	Intergenic	10.1501	8.13706	9.9578	6.23381	5.39699	5.6499	1.63448	0.0187956	Ion channel DMI1 (AHRD V3.3 *** DMI1_MEDTR)
Solyc03g059155.1	SL3.0ch03	30064364	30064827	Intergenic	Intergenic	Exon1	10.1501	8.13706	9.9578	6.23381	5.39699	5.6499	1.63448	0.0187956	Pathogenesis-related thaumatin superfamily protein (AHRD V3.3 --* AT1G77700.1)
Solyc03g059160.2	SL3.0ch03	30064364	30064827	Exon5	Intron5	Intron5	10.1501	8.13706	9.9578	6.23381	5.39699	5.6499	1.63448	0.0187956	Ion channel CASTOR (AHRD V3.3 *-* CASTO_LOTJA)
Solyc03g059310.3	SL3.0ch03	30876559	30877093	LastExon	LastExon	Intergenic	13.8833	10.4827	13.9327	7.40672	6.90296	6.85552	1.80951	0.0350845	Transducin/WD40 repeat-like superfamily protein (AHRD V3.3 *** AT3G18140.1)
Solyc03g062890.3	SL3.0ch03	34634711	34634901	Intron5	LastIntron	LastIntron	3.68287	3.93647	3.86295	2.29758	2.24905	2.02427	1.74744	0.000142524	Superoxide dismutase [Cu-Zn] (AHRD V3.3 *** K4BH38_SOLLC)
Solyc03g063750.3	SL3.0ch03	38190306	38190751	LastExon	LastExon	UTR3	4.27827	3.88168	4.50681	2.1607	2.26867	1.96817	1.97994	0.00232084	exostosin family protein (AHRD V3.3 *** AT3G57630.3)
Solyc03g064030.3	SL3.0ch03	39459406	39459852	LastExon	UTR3	UTR3	11.026	9.14552	10.9649	6.36842	6.58548	5.29558	1.70615	0.00683448	alpha/beta hydrolase family protein (AHRD V3.3 *** AT3G12150.1)
Solyc03g065340.3	SL3.0ch03	43666801	43667179	Exon15	LastIntron	LastIntron	7.49147	6.08172	8.14101	4.10091	3.87452	3.27004	1.93093	0.0177203	Alpha-1,4 glucan phosphorylase (AHRD V3.3 *** K4BHG4_SOLLC)
Solyc03g078060.3	SL3.0ch03	51276753	51277154	LastExon	LastExon	UTR3	15.2688	11.7264	15.4864	10.1069	8.51856	8.4036	1.5717	0.0352878	S-adenosyl-L-methionine-dependent methyltransferases superfamily protein (AHRD V3.3 *-* AT1G26850.3)
Solyc03g078080.3	SL3.0ch03	51472442	51472905	LastExon	LastExon	UTR3	12.409	10.226	13.7323	7.60676	7.38204	6.33874	1.70518	0.0270725	Uridylate kinase (AHRD V3.3 *** W9QLW7_9ROSA)
Solyc03g078150.3	SL3.0ch03	51562008	51562341	LastExon	LastExon	UTR3	15.8007	10.6847	13.7334	6.45702	6.06719	5.33395	2.25212	0.0324456	Amino acid transporter family protein (AHRD V3.3 *** D7LGK0_ARALL)
Solyc03g078350.3	SL3.0ch03	52104546	52104896	UTR3	UTR3	UTR3	7.84777	7.17322	7.84803	4.89402	4.68928	3.85472	1.70182	0.00197119	UPF0235 protein C15orf40 like (AHRD V3.3 *** A0A0B2R9A9_GLYSO)
Solyc03g078390.3	SL3.0ch03	52250129	52250691	LastIntron	UTR3	UTR3	18.7036	16.2608	20.3345	11.0076	11.5587	10.3141	1.68183	0.0173526	Ubiquitin carboxyl-terminal hydrolase (AHRD V3.3 *** G7JCB7_MEDTR)
Solyc03g082395.1	SL3.0ch03	53779803	53780326	LastIntron	Intergenic	Intergenic	10.6336	9.7427	10.6234	4.03684	4.10224	3.55652	2.65054	0.000211016	RNA-binding protein, putative (AHRD V3.3 *-* B9T1D4_RICCO)
Solyc03g082400.3	SL3.0ch03	53779803	53780326	LastIntron	Intergenic	Intergenic	10.6336	9.7427	10.6234	4.03684	4.10224	3.55652	2.65054	0.000211016	heat shock protein 21
Solyc03g082410.3	SL3.0ch03	53779803	53780326	Intergenic	Intergenic	LastExon	10.6336	9.7427	10.6234	4.03684	4.10224	3.55652	2.65054	0.000211016	Heat shock induced transcript 2 (AHRD V3.3 *-* Q96486_SOLLC)
Solyc03g082420.3	SL3.0ch03	53779803	53780326	UTR3	Intergenic	Intergenic	10.6336	9.7427	10.6234	4.03684	4.10224	3.55652	2.65054	0.000211016	Heat shock protein (AHRD V3.3 *** A9QVH3_9FABA)
Solyc03g082480.3	SL3.0ch03	53833819	53834203	LastIntron	Intergenic	Intergenic	7.72546	5.9375	8.01662	4.72934	5.48654	4.15886	1.50817	0.0433	GRF1-interacting factor-like protein (AHRD V3.3 *-* A0A072TYG4_MEDTR)
Solyc03g082490.3	SL3.0ch03	53833819	53834203	UTR3	UTR3	LastIntron	7.72546	5.9375	8.01662	4.72934	5.48654	4.15886	1.50817	0.0433	Reticulocyte-binding 2 a (AHRD V3.3 *** A0A0B0N4X3_GOSAR)
Solyc03g082630.3	SL3.0ch03	53977065	53977472	LastIntron	LastExon	UTR3	9.45832	6.83371	9.17972	5.00348	5.12137	4.19957	1.7782	0.0352565	P-loop containing nucleoside triphosphate hydrolases superfamily protein (AHRD V3.3 *** AT5G53540.1)
Solyc03g083090.3	SL3.0ch03	54335050	54335444	Intergenic	LastIntron	LastIntron	4.91465	4.46196	5.06183	2.94179	3.31295	2.57004	1.63612	0.00289756	transcription factor jumonji (jmjC) domain-containing protein (AHRD V3.3 --* AT1G63490.4)
Solyc03g083095.1	SL3.0ch03	54335050	54335444	LastExon	Intergenic	Intergenic	4.91465	4.46196	5.06183	2.94179	3.31295	2.57004	1.63612	0.00289756	Starch synthase, chloroplastic/amyloplastic (AHRD V3.3 *** K4BI85_SOLLC)
Solyc03g083140.3	SL3.0ch03	54405370	54405657	Exon9	LastIntron	LastIntron	5.62448	4.97752	6.25391	2.44451	2.8368	3.01646	2.03138	0.00732275	Membrane insertion protein, OxaA/YidC with tetratricopeptide repeat domain-containing protein (AHRD V3.3 --* AT3G44370.2)
Solyc03g083200.3	SL3.0ch03	54473135	54473572	LastExon	Intergenic	Intergenic	16.737	13.0591	16.1344	7.56285	8.87576	7.13574	1.94833	0.011429	En/Spm-like transposon (AHRD V3.3 --* AT5G24275.4)
Solyc03g083900.3	SL3.0ch03	55252989	55253285	LastExon	UTR3	UTR3	5.44063	4.29502	5.27223	2.93912	2.95764	2.43785	1.80067	0.0125802	Monocopper oxidase-like protein SKU5 (AHRD V3.3 *** SKU5_ARATH)
Solyc03g093210.3	SL3.0ch03	55833772	55834036	Exon8	Exon8	Exon8	18.3677	14.0609	18.8988	9.4221	8.34844	8.53691	1.95106	0.0275976	DIS3-like exonuclease 2 (AHRD V3.3 *-* A0A0B0Q026_GOSAR)
Solyc03g093450.3	SL3.0ch03	56172334	56172667	LastExon	LastExon	UTR3	10.5949	9.55375	10.4242	5.69816	5.47196	4.73748	1.9219	0.000374687	Kinase family protein (AHRD V3.3 *** D7MGJ0_ARALL)
Solyc03g093470.3	SL3.0ch03	56185280	56185628	LastIntron	UTR3	UTR3	7.13891	7.18941	7.16004	4.43984	5.04901	3.57906	1.64436	0.022202	LEAPSAA2 L.esculentum APS-AA2
Solyc03g093640.3	SL3.0ch03	56606413	56606917	LastIntron	UTR3	Intergenic	20.5497	15.4986	21.1536	12.6421	11.658	10.799	1.62973	0.0449165	embryonic flower 2
Solyc03g093690.3	SL3.0ch03	56755131	56755441	LastExon	LastExon	UTR3	2.78336	2.48294	2.63899	1.62769	2.00088	1.40591	1.57023	0.016763	methionine sulfoxide reductase A4
Solyc03g095240.3	SL3.0ch03	57655922	57656342	LastExon	LastExon	UTR3	32.5403	24.0599	36.4147	15.1461	14.4237	13.6901	2.15014	0.0435129	Tetratricopeptide repeat (TPR)-like superfamily protein (AHRD V3.3 *** AT1G33400.1)
Solyc03g095250.3	SL3.0ch03	57655922	57656342	UTR3	UTR3	UTR3	32.5403	24.0599	36.4147	15.1461	14.4237	13.6901	2.15014	0.0435129	COP1-interacting-like protein, putative (AHRD V3.3 *** A0A072V1D3_MEDTR)
Solyc03g095985.1	SL3.0ch03	59211714	59212194	LastExon	Intergenic	Intergenic	3.98918	4.01783	3.79731	1.97747	2.05987	1.75958	2.03631	9.27191e-05	Differentiation-associated protein 1, putative isoform 2 (AHRD V3.3 *** A0A061FKZ1_THECC)
Solyc03g096070.3	SL3.0ch03	59347454	59347788	LastExon	UTR3	UTR3	11.4002	9.7757	11.4514	6.16163	5.4009	6.36928	1.81952	0.00401921	Phosphoinositide phospholipase C (AHRD V3.3 *** K4BJ29_SOLLC)
Solyc03g096250.3	SL3.0ch03	59665124	59665394	Exon5	Exon5	UTR3	22.2798	19.0407	21.7824	10.6272	8.74018	9.17575	2.21079	0.00171666	Protein yippee-like (AHRD V3.3 *** K4BJ47_SOLLC)
Solyc03g096850.3	SL3.0ch03	60667071	60667404	LastIntron	LastExon	Intergenic	5.34018	5.24846	5.13504	3.44334	3.61781	2.93903	1.57234	0.00727182	rubredoxin family protein (AHRD V3.3 *** AT5G17170.1)
Solyc03g096950.3	SL3.0ch03	60769513	60769953	LastExon	LastExon	UTR3	8.10772	7.01614	8.47264	5.17536	4.92892	4.36713	1.63056	0.0080663	Vacuolar glucose transporter 2
Solyc03g097250.3	SL3.0ch03	60982350	60982863	LastIntron	UTR3	UTR3	7.4801	6.73791	7.79009	4.9212	4.91427	4.3086	1.556	0.00372317	Low-density receptor-like protein (AHRD V3.3 *** AT5G16660.1)
Solyc03g097370.3	SL3.0ch03	61116776	61117103	LastExon	UTR3	UTR3	7.37098	5.15521	7.52937	3.56522	4.54366	3.30846	1.75659	0.045309	DNA-binding SMUBP-2 (AHRD V3.3 *** A0A0B0N417_GOSAR)
Solyc03g097470.3	SL3.0ch03	61235517	61235839	UTR3	UTR3	Intergenic	5.0225	4.08862	5.39103	2.44631	2.52509	2.2394	2.01117	0.0204514	Ketoacyl-ACP synthase III (AHRD V3.3 *** M4QSR7_9ERIC)
Solyc03g097800.3	SL3.0ch03	61563731	61564095	LastIntron	LastExon	UTR3	7.331	6.16575	8.15877	4.75998	4.87295	3.94514	1.59489	0.0259917	V-type proton ATPase subunit C (AHRD V3.3 *** VATC_ARATH)
Solyc03g097990.3	SL3.0ch03	61784998	61785346	LastExon	UTR3	UTR3	9.12443	6.99231	9.74311	4.97148	4.54132	4.1178	1.89719	0.0309597	RNA polymerase II subunit A C-terminal domain phosphatase SSU72 (AHRD V3.3 *** A0A0B0NIE4_GOSAR)
Solyc03g098170.3	SL3.0ch03	61935747	61936253	LastIntron	UTR3	UTR3	10.8291	8.7075	11.693	6.7649	7.39441	5.47037	1.59094	0.0282539	tubulin folding cofactor B (AHRD V3.3 *** AT3G10220.1)
Solyc03g098230.3	SL3.0ch03	62029953	62030419	LastExon	LastExon	UTR3	7.10895	6.09752	7.82845	4.78427	5.01874	4.18135	1.50418	0.0259132	1-aminocyclopropane-1-carboxylate deaminase/D-cysteine desulfhydrase (AHRD V3.3 *** A0A103YE80_CYNCS)
Solyc03g098620.3	SL3.0ch03	62365024	62365521	LastIntron	LastExon	UTR3	8.15909	6.35934	7.79257	4.33496	5.22086	3.91281	1.65652	0.0149533	DNA-binding RHL1-like protein (AHRD V3.3 *** A0A0B0MTJ7_GOSAR)
Solyc03g098630.3	SL3.0ch03	62365024	62365521	UTR3	UTR3	UTR3	8.15909	6.35934	7.79257	4.33496	5.22086	3.91281	1.65652	0.0149533	DUF789 family protein (AHRD V3.3 *-* G7KKC4_MEDTR)
Solyc03g110940.3	SL3.0ch03	63154361	63154851	LastIntron	LastExon	UTR3	23.5787	16.6072	23.4952	9.55786	10.2267	8.19445	2.27603	0.0292116	Protein kinase superfamily protein (AHRD V3.3 *** AT5G50330.1)
Solyc03g111010.3	SL3.0ch03	63195570	63195950	LastIntron	LastExon	UTR3	4.88532	4.68876	5.41213	3.21751	3.52043	2.77717	1.57499	0.00394512	Glyceraldehyde-3-phosphate dehydrogenase (AHRD V3.3 *** K7WNY2_SOLTU)
Solyc03g111080.3	SL3.0ch03	63230612	63231245	Intron1	Exon2	UTR3	7.34304	6.24565	7.46464	4.79715	5.05807	3.86218	1.53479	0.0101014	Ketoacyl ACP reductase (AHRD V3.3 *-* A0A0M4C341_JATCU)
Solyc03g111090.3	SL3.0ch03	63230612	63231245	LastExon	UTR3	UTR3	7.34304	6.24565	7.46464	4.79715	5.05807	3.86218	1.53479	0.0101014	Transcription factor GTE10 (AHRD V3.3 *** W9SF96_9ROSA)
Solyc03g111830.3	SL3.0ch03	63933047	63933461	UTR3	UTR3	UTR3	6.59904	6.3282	6.68701	4.29774	4.64295	3.83211	1.53563	0.00395196	Protein-L-isoaspartate O-methyltransferase (AHRD V3.3 *** K4BK44_SOLLC)
Solyc03g111840.3	SL3.0ch03	63933047	63933461	LastIntron	UTR3	UTR3	6.59904	6.3282	6.68701	4.29774	4.64295	3.83211	1.53563	0.00395196	RNA-binding protein (AHRD V3.3 *** A0A0K9NVY1_ZOSMR)
Solyc03g111850.3	SL3.0ch03	63941899	63942323	LastIntron	Intergenic	Intergenic	9.22458	7.66489	10.0177	5.2422	6.12931	5.05601	1.63793	0.0217309	Indole-3-glycerol phosphate synthase (AHRD V3.3 *** W8SVJ4_TOBAC)
Solyc03g112530.3	SL3.0ch03	64399729	64400011	LastIntron	UTR3	UTR3	5.5837	5.11165	5.50004	3.20501	3.828	2.77816	1.65071	0.00924517	Transducin/WD40 repeat-like superfamily protein (AHRD V3.3 *** AT3G49660.1)
Solyc03g112565.1	SL3.0ch03	64443393	64443791	LastIntron	Intergenic	Intergenic	12.411	10.3028	13.1298	7.13641	7.51862	5.98116	1.73693	0.0124968	Ribonucleoside-diphosphate reductase subunit beta (AHRD V3.3 *** A0A0B0P1E0_GOSAR)
Solyc03g112670.3	SL3.0ch03	64530913	64531308	LastExon	LastExon	UTR3	8.31734	7.6909	8.71964	4.77575	5.21989	3.75799	1.79792	0.00343255	embryo defective 2759 (AHRD V3.3 *** AT5G63050.1)
Solyc03g113060.3	SL3.0ch03	64836497	64836876	LastExon	UTR3	UTR3	13.5184	11.5888	10.5592	6.14617	7.82697	5.75292	1.80808	0.00974185	ABC transporter A family protein (AHRD V3.3 *** A0A072UUA7_MEDTR)
Solyc03g113100.3	SL3.0ch03	64862436	64862847	LastExon	UTR3	UTR3	4.74571	4.16421	4.86139	2.53597	2.63379	2.25444	1.85492	0.00309309	Ubiquitin-conjugating enzyme (AHRD V3.3 *** A0A072TRF9_MEDTR)
Solyc03g113350.3	SL3.0ch03	64989685	64989946	LastExon	LastExon	UTR3	13.1539	11.7456	13.3812	8.04739	6.86483	5.95256	1.8347	0.00206701	Zinc finger protein, putative (AHRD V3.3 *** B9R926_RICCO)
Solyc03g114030.3	SL3.0ch03	65554185	65554537	LastExon	UTR3	UTR3	5.08049	4.36742	5.58039	3.29472	3.52831	2.99365	1.53089	0.0244409	PermeaseI-like protein
Solyc03g114340.3	SL3.0ch03	65836957	65837290	LastExon	LastExon	UTR3	3.99008	4.09235	3.85323	2.42925	2.63308	2.11954	1.66191	0.00304762	1-deoxy-D-xylulose-5-phosphate reductoisomerase
Solyc03g114450.3	SL3.0ch03	65935438	65935685	LastExon	LastExon	UTR3	3.92387	3.69709	3.12455	2.18344	2.86812	2.05222	1.51265	0.0251332	Calcium-sensing receptor (AHRD V3.3 *** K7ZLE1_NICBE)
Solyc03g114830.3	SL3.0ch03	66183197	66183564	LastIntron	UTR3	UTR3	5.21043	4.87455	5.19369	3.32526	3.84804	2.50267	1.57903	0.0334724	FRUITFULL-like MADS-box 2
Solyc03g116247.1	SL3.0ch03	67230127	67230387	UTR3	UTR3	UTR3	6.12902	5.37662	5.64455	3.62655	3.43241	4.23741	1.5182	0.00410556	Alpha 1,4-glycosyltransferase family protein (AHRD V3.3 *-* Q2MGS1_MEDTR)
Solyc03g117320.3	SL3.0ch03	67964377	67964753	LastExon	UTR3	Intergenic	3.53938	3.13934	3.59087	2.18605	2.21154	1.94471	1.61922	0.00313637	Ribosomal protein L3 (AHRD V3.3 *** A0A103XT80_CYNCS)
Solyc03g117330.3	SL3.0ch03	67974186	67974420	LastIntron	LastExon	UTR3	9.32239	7.46947	9.93576	4.73785	6.53793	4.3383	1.71176	0.0213056	tRNA synthetase-related family protein (AHRD V3.3 *** B9GTA1_POPTR)
Solyc03g117370.3	SL3.0ch03	68022662	68022972	LastExon	LastExon	UTR3	9.75186	8.62191	9.87066	6.38134	6.28793	6.00005	1.51288	0.0104539	TOPLESS-related 1 (AHRD V3.3 *-* AT1G80490.3)
Solyc03g117420.3	SL3.0ch03	68039352	68040076	Exon17	UTR3	UTR3	3.48219	3.46262	3.34551	2.03073	2.33288	1.81943	1.66428	0.0077164	F-box/LRR-repeat protein (AHRD V3.3 *** A0A0K9PK37_ZOSMR)
Solyc03g117470.3	SL3.0ch03	68100709	68101025	Intron6	Intron7	Intron7	6.0434	5.95144	7.58426	3.36855	3.4851	2.90165	2.00702	0.017067	Calcium-binding EF-hand family protein (AHRD V3.3 *** AT3G18430.3)
Solyc03g117480.3	SL3.0ch03	68100709	68101025	Intron15	Intron15	Intron15	6.0434	5.95144	7.58426	3.36855	3.4851	2.90165	2.00702	0.017067	Pyrophosphate-energized vacuolar membrane proton pump (AHRD V3.3 *** AVP_VIGRR)
Solyc03g117480.3	SL3.0ch03	68108400	68108711	Intron8	Intron8	Intron8	4.56439	3.96905	4.70012	2.62587	2.7505	2.41377	1.69876	0.00690266	Pyrophosphate-energized vacuolar membrane proton pump (AHRD V3.3 *** AVP_VIGRR)
Solyc03g118300.1	SL3.0ch03	68707128	68707469	LastExon	LastExon	Intergenic	3.6411	3.31662	3.70859	1.28602	1.2616	1.26507	2.79758	0.00270388	Pyridoxal phosphate (PLP)-dependent transferases superfamily protein (AHRD V3.3 --* AT3G17720.1)
Solyc03g118720.3	SL3.0ch03	69047860	69048136	LastExon	LastExon	UTR3	2.82313	2.73279	2.90673	1.78737	1.86665	1.48389	1.6471	0.00460055	C2-domain ABA-related family protein
Solyc03g118890.3	SL3.0ch03	69162591	69163024	LastIntron	LastExon	UTR3	6.80369	6.05106	6.5772	3.94877	4.64744	4.00159	1.54249	0.00197403	Protein phosphatase 2C family protein (AHRD V3.3 *** AT1G18030.1)
Solyc03g118990.2	SL3.0ch03	69203890	69204194	UTR3	UTR3	UTR3	5.34424	4.48078	5.68645	3.8231	3.31115	3.18294	1.50346	0.0226403	Elongation factor 1 alpha (AHRD V3.3 *-* A0A1B2LUN9_9CARY)
Solyc03g118995.1	SL3.0ch03	69203890	69204194	UTR3	UTR3	UTR3	5.34424	4.48078	5.68645	3.8231	3.31115	3.18294	1.50346	0.0226403	Elongation factor 1 alpha (AHRD V3.3 *-* A0A1B2LUN9_9CARY),Pfam:PF00009
Solyc03g119140.3	SL3.0ch03	69330838	69331196	Exon18	Intron18	Intron18	5.18556	4.22059	5.4754	3.61593	3.12102	3.12834	1.50847	0.0325881	MAP kinase kinase kinase 30
Solyc03g120000.3	SL3.0ch03	69992630	69992977	UTR3	UTR3	UTR3	11.1267	8.86832	12.1599	6.79769	7.11522	6.29817	1.59096	0.0478066	RING/U-box superfamily protein (AHRD V3.3 --* AT1G72220.1)
Solyc03g120010.3	SL3.0ch03	69992630	69992977	LastIntron	Intergenic	Intergenic	11.1267	8.86832	12.1599	6.79769	7.11522	6.29817	1.59096	0.0478066	Eukaryotic translation initiation factor 3 subunit I (AHRD V3.3 *** A0A0K9NVH2_ZOSMR)
Solyc03g120610.3	SL3.0ch03	70442010	70442356	LastExon	UTR3	UTR3	8.01372	6.68968	8.66199	4.29358	4.5945	3.97391	1.81662	0.0190602	Cytochrome c-type biogenesis CcmH (AHRD V3.3 *** A0A0B0PL66_GOSAR)
Solyc03g120720.3	SL3.0ch03	70503539	70504390	LastExon	Intergenic	Intergenic	9.58323	7.57996	10.6821	4.41199	4.63774	3.9097	2.14865	0.0266167	Protein disulfide isomerase like protein (AHRD V3.3 *** C4T847_SOYBN)
Solyc03g120730.3	SL3.0ch03	70503539	70504390	LastIntron	Intergenic	Intergenic	9.58323	7.57996	10.6821	4.41199	4.63774	3.9097	2.14865	0.0266167	Sulfite exporter TauE/SafE family protein (AHRD V3.3 *** AT2G25737.1)
Solyc03g121000.3	SL3.0ch03	70717653	70717928	LastIntron	LastExon	UTR3	5.35699	5.67886	4.59602	3.34221	4.29346	2.58989	1.52871	0.0458345	RNA polymerase II-associated factor 1 (AHRD V3.3 --* A0A0B0MF48_GOSAR)
Solyc03g121010.3	SL3.0ch03	70739970	70740348	LastIntron	LastIntron	LastIntron	10.5854	9.40353	11.7726	7.36913	7.06098	6.20373	1.53929	0.0172432	RNA polymerase II-associated factor 1 like (AHRD V3.3 *** A0A0B2S4P2_GLYSO)
Solyc03g121020.3	SL3.0ch03	70739970	70740348	LastIntron	LastExon	UTR3	10.5854	9.40353	11.7726	7.36913	7.06098	6.20373	1.53929	0.0172432	RNA polymerase II-associated factor 1 like (AHRD V3.3 *** A0A0B2S4P2_GLYSO)
Solyc03g121030.2	SL3.0ch03	70739970	70740348	UTR3	UTR3	UTR3	10.5854	9.40353	11.7726	7.36913	7.06098	6.20373	1.53929	0.0172432	MMS19 nucleotide excision repair (AHRD V3.3 *** A0A0B0MQY6_GOSAR)
Solyc03g121260.3	SL3.0ch03	70905636	70906036	LastExon	UTR3	UTR3	26.3837	18.2645	24.9041	11.6913	11.3324	10.0487	2.10302	0.035339	RNA methyltransferase family protein (AHRD V3.3 *** AT3G21300.1)
Solyc03g121290.3	SL3.0ch03	70928679	70929030	LastExon	Intergenic	Intergenic	8.23197	6.49607	7.70038	4.2846	4.82085	3.87765	1.72751	0.0118676	F-box/RNI/FBD-like domain protein (AHRD V3.3 *** G7IHX4_MEDTR)
Solyc03g121370.3	SL3.0ch03	70961300	70961643	UTR3	UTR3	UTR3	6.29035	5.39982	6.43834	3.68513	3.31475	3.25225	1.76827	0.0072919	Ribosomal protein S8 (AHRD V3.3 *** A0A124SDM5_CYNCS)
Solyc03g121440.3	SL3.0ch03	71041035	71041274	LastExon	LastExon	UTR3	6.27012	5.96724	6.50349	3.31282	3.33064	3.74628	1.80378	0.000197353	Kinase family protein (AHRD V3.3 *** U5GQI1_POPTR)
Solyc03g121450.3	SL3.0ch03	71041035	71041274	UTR3	UTR3	UTR3	6.27012	5.96724	6.50349	3.31282	3.33064	3.74628	1.80378	0.000197353	RNA-binding family protein (AHRD V3.3 *** B9MWQ9_POPTR)
Solyc03g121560.3	SL3.0ch03	71134238	71134552	LastIntron	LastExon	UTR3	14.9981	12.9586	15.5523	9.58347	10.1646	7.92661	1.57216	0.00747907	AT1G17665-like protein (AHRD V3.3 *** A0A0G4AP21_9ROSI)
Solyc03g121800.3	SL3.0ch03	71334722	71334945	LastIntron	Intergenic	Intergenic	25.0208	18.1992	28.3891	6.80187	7.55323	6.85108	3.37681	0.0296955	copz1 nonclathrin coat protein zeta1-COP
Solyc03g121880.3	SL3.0ch03	71401437	71401788	LastExon	LastExon	UTR3	3.04104	3.13127	3.11111	2.02498	2.23092	1.80496	1.5317	0.0100625	Protein phosphatase 2c, putative (AHRD V3.3 *** B9S5U9_RICCO)
Solyc03g121940.3	SL3.0ch03	71422713	71423025	LastExon	UTR3	UTR3	5.99005	5.44739	5.45696	3.94981	4.05803	3.17284	1.51104	0.00728645	Nuclear transcription factor Y subunit (AHRD V3.3 *-* A0A0K9P8V1_ZOSMR)
Solyc03g122270.3	SL3.0ch03	71628035	71628435	Intron13	Intron14	Intron14	5.36041	4.70147	5.4761	3.16714	3.8517	2.62666	1.6109	0.0136317	Inter-alpha-trypsin inhibitor heavy chain-related, putative (AHRD V3.3 *** A0A061GD07_THECC)
Solyc03g122370.3	SL3.0ch03	71718044	71718479	LastIntron	UTR3	UTR3	10.5338	8.21903	10.3743	5.02329	6.03178	4.48476	1.87435	0.010957	ARM repeat superfamily protein (AHRD V3.3 *** AT1G72560.7)
Solyc03g123750.3	SL3.0ch03	72002432	72002713	UTR3	UTR3	Intergenic	3.96949	3.68724	4.5338	2.40964	2.5711	2.77506	1.5718	0.0157597	Lipase (AHRD V3.3 *** Q5S8F1_RICCO)
Solyc03g124060.3	SL3.0ch03	72275566	72275885	LastExon	UTR3	UTR3	5.2172	4.62644	6.34502	3.03549	3.88111	3.04601	1.62494	0.0343759	StAR-related lipid transfer protein 7, mitochondrial (AHRD V3.3 *** A0A1D1Z6M2_9ARAE)
Solyc04g005030.3	SL3.0ch04	30103	30557	Exon13	LastIntron	LastIntron	7.90366	6.78998	8.47007	4.98777	5.35467	4.43192	1.56783	0.0145478	Transducin/WD40 repeat-like superfamily protein (AHRD V3.3 *-* AT1G24130.1)
Solyc04g005280.3	SL3.0ch04	211768	212085	LastIntron	LastExon	UTR3	9.68191	7.66038	10.2813	5.47604	6.1885	4.71751	1.68621	0.0242026	bHLH transcription factor 028
Solyc04g006970.3	SL3.0ch04	663676	663960	LastExon	UTR3	UTR3	4.22562	4.32271	4.53862	2.51342	2.788	2.1063	1.76666	0.00402199	Phosphoenolpyruvate carboxylase (AHRD V3.3 *** A6YM33_RICCO)
Solyc04g007850.3	SL3.0ch04	1518644	1518959	LastIntron	UTR3	UTR3	13.3763	10.3012	13.0239	6.6136	8.17241	6.29938	1.74061	0.016031	Protein BCCIP homolog (AHRD V3.3 *** A0A0V0I1F4_SOLCH)
Solyc04g008580.3	SL3.0ch04	2185442	2185915	LastIntron	UTR3	UTR3	10.2968	8.37542	10.5653	6.70015	6.53145	5.68093	1.54593	0.0231613	Ankyrin repeat family protein (AHRD V3.3 *** B9HNG0_POPTR)
Solyc04g008700.3	SL3.0ch04	2378465	2379422	LastExon	LastExon	Intergenic	5.59154	4.71347	5.74454	3.09665	3.18117	2.6314	1.80145	0.00691366	Transcription elongation regulator 1 (AHRD V3.3 *** A0A1D1XFU2_9ARAE)
Solyc04g008710.3	SL3.0ch04	2378465	2379422	Exon2	Intergenic	Intergenic	5.59154	4.71347	5.74454	3.09665	3.18117	2.6314	1.80145	0.00691366	tRNA 2-thiocytidine biosynthesis TtcA (AHRD V3.3 *-* A0A0B0N6V1_GOSAR)
Solyc04g009320.3	SL3.0ch04	2771824	2772076	UTR3	UTR3	UTR3	7.61774	6.78786	7.18773	4.37379	4.67461	4.10121	1.64213	0.00112048	Hsp70 nucleotide exchange factor FES1 (AHRD V3.3 *** A0A0B0MDD7_GOSAR)
Solyc04g009360.3	SL3.0ch04	2794084	2794398	LastExon	UTR3	Intergenic	10.2573	9.57129	10.4767	6.47969	5.79334	5.86849	1.67049	0.000408405	Transducin/WD40 repeat-like superfamily protein (AHRD V3.3 *** AT5G54520.1)
Solyc04g009370.3	SL3.0ch04	2800965	2801232	LastIntron	UTR3	UTR3	21.7929	16.9193	23.5977	13.0396	14.4909	10.9791	1.61803	0.0387748	Protease (AHRD V3.3 *** A0A1D1YP20_9ARAE)
Solyc04g009430.3	SL3.0ch04	2851123	2851435	LastExon	LastExon	UTR3	11.7951	9.54914	12.1595	7.89841	7.19636	6.56004	1.54717	0.0244981	NAD-dependent protein deacylase (AHRD V3.3 *** K4BP99_SOLLC)
Solyc04g009550.3	SL3.0ch04	2960287	2960489	LastIntron	LastExon	UTR3	14.4861	11.3838	14.5833	4.45619	4.20097	4.19877	3.14666	0.0123672	TONNEAU 1B family protein (AHRD V3.3 *** B9HM06_POPTR)
Solyc04g009560.3	SL3.0ch04	2960287	2960489	UTR3	UTR3	UTR3	14.4861	11.3838	14.5833	4.45619	4.20097	4.19877	3.14666	0.0123672	TBC1 domain family member 8B (AHRD V3.3 *** W9RFJ9_9ROSA)
Solyc04g009650.3	SL3.0ch04	3019451	3019773	LastExon	Intergenic	Intergenic	2.90217	3.15063	3.16699	2.1886	1.88874	1.48764	1.65675	0.0154544	Diphosphomevalonate decarboxylase (AHRD V3.3 *-* M1BB88_SOLTU)
Solyc04g009810.3	SL3.0ch04	3117670	3117971	LastExon	UTR3	Intergenic	9.64543	7.84775	10.3657	6.16469	5.43293	5.40549	1.63846	0.0301764	Protein pelota homolog (AHRD V3.3 *** K4BPD6_SOLLC)
Solyc04g009830.3	SL3.0ch04	3154240	3154491	LastExon	UTR3	UTR3	9.79706	8.33319	10.9992	2.90114	2.7097	2.14423	3.75618	0.00744482	Vacuolar protein sorting-associated protein 72 like (AHRD V3.3 *** A0A0B2R1L5_GLYSO)
Solyc04g009970.3	SL3.0ch04	3293127	3293359	UTR3	UTR3	UTR3	8.495	6.23056	8.11943	4.68211	4.07967	3.0348	1.93658	0.0160167	SWIM zinc finger family protein (AHRD V3.3 *** AT1G60560.1)
Solyc04g011500.3	SL3.0ch04	3939587	3939909	LastIntron	LastExon	UTR3	5.37689	4.78202	6.25023	3.50105	3.79926	3.01855	1.59021	0.0237795	actin
Solyc04g011530.3	SL3.0ch04	3968235	3968758	LastExon	LastExon	UTR3	9.40514	8.37793	9.21801	6.07556	6.3811	5.10962	1.5371	0.00358864	cytochrome oxidase complex assembly protein (AHRD V3.3 *** AT2G20390.1)
Solyc04g014270.3	SL3.0ch04	4586017	4586480	LastExon	LastExon	UTR3	17.4832	13.1731	18.3046	8.51252	8.43465	7.67657	1.98836	0.033369	ATP-dependent 6-phosphofructokinase (AHRD V3.3 *** K4BPT1_SOLLC)
Solyc04g014275.1	SL3.0ch04	4586017	4586480	Intergenic	Intergenic	Intron1	17.4832	13.1731	18.3046	8.51252	8.43465	7.67657	1.98836	0.033369	BRCT domain-containing DNA repair protein (AHRD V3.3 --* AT4G03130.4)
Solyc04g015160.3	SL3.0ch04	5347472	5347893	LastExon	LastExon	UTR3	7.87349	6.585	8.92602	4.32517	4.62683	3.95802	1.81134	0.0280201	C2 and GRAM domain-containing protein (AHRD V3.3 *** W9RQD0_9ROSA)
Solyc04g015180.3	SL3.0ch04	5370564	5371028	UTR3	UTR3	Intergenic	7.68561	6.17247	8.32228	4.84372	4.99725	4.27491	1.5713	0.040205	DNA-directed RNA polymerase II subunit rpb4 (AHRD V3.3 *** A0A151T6X0_CAJCA)
Solyc04g015340.3	SL3.0ch04	5526633	5527007	LastExon	UTR3	UTR3	4.76184	3.8412	4.88502	1.84571	1.76875	1.56739	2.60294	0.0102458	Carboxypeptidase (AHRD V3.3 *** K4BQ37_SOLLC)
Solyc04g040160.3	SL3.0ch04	11979233	11979488	LastExon	LastExon	UTR3	13.0022	11.3192	14.9348	6.45879	8.01989	6.82023	1.84311	0.0164205	Pheophorbide A oxygenase, putative (AHRD V3.3 *** B9T573_RICCO)
Solyc04g049890.3	SL3.0ch04	44641398	44641639	LastExon	Intergenic	Intergenic	16.0515	11.624	16.8776	7.55399	7.75429	7.40492	1.96155	0.0462189	D-aminoacid aminotransferase-like PLP-dependent enzymes superfamily protein (AHRD V3.3 *** AT3G54970.1)
Solyc04g050470.3	SL3.0ch04	47211524	47211998	LastIntron	UTR3	UTR3	9.8097	8.06437	10.2025	5.5736	5.5058	4.91651	1.75523	0.0180847	LOW protein: ammonium transporter 1-like protein (AHRD V3.3 *** AT5G37360.1)
Solyc04g050565.1	SL3.0ch04	47529098	47529341	LastExon	LastExon	UTR3	2.7251	3.00311	2.79844	1.86875	1.95705	1.85211	1.50172	0.00327202	OSBP(oxysterol binding protein)-related protein 2A (AHRD V3.3 --* AT4G22540.6)
Solyc04g051350.3	SL3.0ch04	50349696	50349937	LastExon	LastExon	UTR3	10.3398	7.49535	11.2743	2.97493	3.34499	3.09711	3.09115	0.0277555	Ribonucleoside-diphosphate reductase (AHRD V3.3 *** K4BS95_SOLLC)
Solyc04g051830.3	SL3.0ch04	51075152	51075589	LastIntron	UTR3	Intergenic	11.9416	10.6317	12.2517	7.79702	8.06465	7.19096	1.51068	0.00589561	Developmentally-regulated GTP-binding protein 1 (AHRD V3.3 *** A0A0B2PPN5_GLYSO)
Solyc04g054310.3	SL3.0ch04	52234825	52235124	LastIntron	LastExon	Intergenic	4.77278	4.03591	5.14339	3.05428	3.53418	2.53471	1.5293	0.0213588	Alanine-glyoxylate aminotransferase, putative (AHRD V3.3 *** B9T1D1_RICCO)
Solyc04g054320.3	SL3.0ch04	52235372	52235619	UTR3	UTR3	UTR3	7.40885	6.70749	7.46411	4.33496	4.43442	3.89526	1.70399	0.0010056	leucine-zipper transcription factor
Solyc04g054770.1	SL3.0ch04	53171173	53171488	LastExon	Intergenic	Intergenic	3.00134	2.83057	3.07762	1.77198	1.77157	1.67934	1.70586	0.00104286	LOW QUALITY:Ubiquitin carboxyl-terminal hydrolase family protein (AHRD V3.3 --* AT5G45790.2)
Solyc04g057970.3	SL3.0ch04	55037974	55038274	LastExon	Intergenic	Intergenic	10.1957	9.39032	11.5664	5.99953	5.92538	5.59534	1.77808	0.0161311	ATPase, V1 complex, subunit B protein (AHRD V3.3 --* AT4G38510.5)
Solyc04g064560.3	SL3.0ch04	55740488	55740896	LastIntron	UTR3	UTR3	24.5046	18.381	24.9044	12.4623	15.3494	12.0742	1.6996	0.0305244	Small RNA degrading nuclease (AHRD V3.3 *** A0A072VFB2_MEDTR)
Solyc04g064930.3	SL3.0ch04	56097327	56097772	UTR3	UTR3	UTR3	14.7129	10.8313	14.4514	7.34846	6.99763	6.59259	1.91013	0.0334818	Peroxiredoxin (AHRD V3.3 *** G8JBE2_9ORYZ)
Solyc04g071140.3	SL3.0ch04	58160582	58160870	Exon6	Exon6	UTR3	6.89163	6.63891	7.52725	4.09749	3.56841	3.64824	1.86119	0.00114227	Serine decarboxylase (AHRD V3.3 *** SDC1_ARATH)
Solyc04g071150.3	SL3.0ch04	58160582	58160870	UTR3	UTR3	UTR3	6.89163	6.63891	7.52725	4.09749	3.56841	3.64824	1.86119	0.00114227	Cytochrome P450 family protein (AHRD V3.3 *** A0A072U8X2_MEDTR)
Solyc04g071565.1	SL3.0ch04	58629335	58629640	LastExon	LastExon	UTR3	12.416	10.4527	13.9497	7.81878	8.85684	7.00876	1.55454	0.0308103	Thioredoxin family protein (AHRD V3.3 *** A9PGA7_POPTR)
Solyc04g072060.3	SL3.0ch04	59202245	59202726	LastIntron	UTR3	UTR3	14.5188	11.4032	15.5765	9.25824	8.53662	8.04223	1.60616	0.0443534	Rab family GTPase (AHRD V3.3 *** D8RRT7_SELML)
Solyc04g072150.2	SL3.0ch04	59266440	59266902	UTR3	Intergenic	Intergenic	9.87966	8.92247	9.71559	6.17934	6.72841	5.03103	1.58972	0.00712614	Pentatricopeptide repeat-containing protein, putative (AHRD V3.3 *** B9T6B6_RICCO)
Solyc04g072160.3	SL3.0ch04	59266440	59266902	LastIntron	UTR3	UTR3	9.87966	8.92247	9.71559	6.17934	6.72841	5.03103	1.58972	0.00712614	HSP20-like chaperones superfamily protein (AHRD V3.3 *** A0A061FJ96_THECC)
Solyc04g072400.3	SL3.0ch04	59512716	59513086	UTR3	UTR3	UTR3	4.09969	4.12927	3.77789	2.47816	2.89682	2.2367	1.57743	0.00576159	Plant/F7F23-4 protein (AHRD V3.3 *** G7IJR9_MEDTR)
Solyc04g072410.3	SL3.0ch04	59512716	59513086	UTR3	UTR3	UTR3	4.09969	4.12927	3.77789	2.47816	2.89682	2.2367	1.57743	0.00576159	Trafficking protein particle complex subunit-like protein (AHRD V3.3 *** A2Q3F3_MEDTR)
Solyc04g072460.3	SL3.0ch04	59570644	59570879	LastExon	Intergenic	Intergenic	4.61533	4.84385	5.49916	2.99064	3.64112	2.88703	1.57145	0.00717678	bZIP transcription factor family protein (AHRD V3.3 *** AT5G65210.7)
Solyc04g073970.3	SL3.0ch04	60087982	60088329	LastExon	LastExon	UTR3	5.32623	4.89018	4.98755	3.18267	3.43344	2.83637	1.60846	0.00123965	N-lysine methyltransferase (AHRD V3.3 *** AT1G78150.3)
Solyc04g074145.1	SL3.0ch04	60232520	60232991	LastExon	LastExon	UTR3	7.17607	6.42545	7.17959	4.32482	4.61574	3.63207	1.65288	0.00224619	transmembrane protein (AHRD V3.3 *** AT1G34630.1)
Solyc04g074220.3	SL3.0ch04	60305543	60305935	UTR3	UTR3	LastIntron	10.3605	8.74565	11.0359	5.6158	5.61526	5.03577	1.85298	0.0152432	alpha/beta-Hydrolases superfamily protein (AHRD V3.3 *** AT5G09430.1)
Solyc04g074230.3	SL3.0ch04	60305543	60305935	LastIntron	UTR3	UTR3	10.3605	8.74565	11.0359	5.6158	5.61526	5.03577	1.85298	0.0152432	SIG74 14-3-3 family protein
Solyc04g074240.3	SL3.0ch04	60318131	60318442	UTR3	UTR3	UTR3	3.56561	2.86486	3.6635	2.22563	2.2805	1.88116	1.58032	0.022843	5-adenylylsulfate reductase-like protein (AHRD V3.3 *** A0A072UZH9_MEDTR)
Solyc04g074510.3	SL3.0ch04	60588339	60588720	LastExon	LastExon	UTR3	2.59011	2.29707	2.90146	1.87575	1.66765	1.63706	1.50347	0.0242382	tft3 14-3-3
Solyc04g074550.3	SL3.0ch04	60621339	60621751	LastIntron	LastExon	UTR3	7.70038	6.48104	8.18732	5.19758	4.30027	4.41287	1.60802	0.0151175	Cytochrome c oxidase subunit 6B (AHRD V3.3 *** A0A151TZY7_CAJCA)
Solyc04g074850.3	SL3.0ch04	60852675	60852939	Intron4	Exon5	Intron5	3.06016	2.56202	2.46774	0.782117	0.886984	0.815959	3.25542	0.00813673	ripening regulated protein DDTFR18
Solyc04g077420.3	SL3.0ch04	62419681	62420070	LastExon	UTR3	Intergenic	6.31584	5.18683	6.24566	4.15163	3.35013	3.50683	1.61223	0.0098764	transmembrane protein (AHRD V3.3 *** AT3G49720.3)
Solyc04g078400.3	SL3.0ch04	63237004	63237393	LastIntron	LastExon	UTR3	15.5857	11.8357	15.5408	8.69248	7.72255	7.62469	1.78714	0.0294917	Mortality factor 4 like 1 (AHRD V3.3 *** A0A0K9PQT8_ZOSMR)
Solyc04g078410.3	SL3.0ch04	63237004	63237393	Intron9	Intron9	Intron9	15.5857	11.8357	15.5408	8.69248	7.72255	7.62469	1.78714	0.0294917	Serine/threonine-protein kinase (AHRD V3.3 *** M0ZUR7_SOLTU)
Solyc04g078600.3	SL3.0ch04	63369824	63370142	UTR3	UTR3	UTR3	4.0826	3.5751	4.31907	2.28869	2.27616	2.54775	1.68388	0.00953392	50S ribosomal protein L4 (AHRD V3.3 *** A0A1D1XFF1_9ARAE)
Solyc04g078610.3	SL3.0ch04	63369824	63370142	UTR3	UTR3	UTR3	4.0826	3.5751	4.31907	2.28869	2.27616	2.54775	1.68388	0.00953392	Kinesin-like protein (AHRD V3.3 *** A0A0V0IYA4_SOLCH)
Solyc04g078620.3	SL3.0ch04	63398546	63398818	LastIntron	LastExon	Intergenic	7.37121	7.27238	7.15393	4.26846	5.02388	3.91527	1.65038	0.0106282	Ubiquitin-conjugating enzyme family protein (AHRD V3.3 *** A9PAA6_POPTR)
Solyc04g078810.3	SL3.0ch04	63558370	63558601	UTR3	UTR3	UTR3	2.24368	2.29541	2.63999	1.18214	1.22284	1.08289	2.0583	0.00566324	Remorin (AHRD V3.3 *** Q00M66_SOYBN)
Solyc04g078870.3	SL3.0ch04	63623466	63623711	Intron11	Intron11	Intron11	7.69077	5.77633	7.89924	4.11395	4.72513	4.28328	1.62824	0.0472665	Protein kinase family protein (AHRD V3.3 *** AT5G09890.1)
Solyc04g078890.3	SL3.0ch04	63633773	63634153	UTR3	UTR3	UTR3	6.87812	5.97748	7.62047	2.93634	2.58385	2.58813	2.52532	0.00968857	Coenzyme Q-binding protein COQ10, mitochondrial (AHRD V3.3 *** A0A1D1YUM5_9ARAE)
Solyc04g079047.1	SL3.0ch04	63730038	63730432	LastIntron	Intergenic	Intergenic	18.2854	13.7621	19.6863	10.578	9.68516	9.05931	1.76431	0.0458225	Serine carboxypeptidase, putative (AHRD V3.3 *** B9R6Y3_RICCO)
Solyc04g079060.3	SL3.0ch04	63730038	63730432	Intron13	UTR3	UTR3	18.2854	13.7621	19.6863	10.578	9.68516	9.05931	1.76431	0.0458225	Serine carboxypeptidase, putative (AHRD V3.3 *** B9R6Y4_RICCO)
Solyc04g079280.3	SL3.0ch04	63883279	63883492	Intron10	Intron10	Intron10	6.61398	6.69451	6.35912	3.73325	5.16953	3.63207	1.56903	0.0364109	alpha/beta-Hydrolases superfamily protein (AHRD V3.3 *** AT4G34310.1)
Solyc04g080350.3	SL3.0ch04	64650801	64651131	LastExon	LastExon	UTR3	5.85513	5.54833	6.27158	3.59927	4.46493	3.3663	1.5463	0.00989669	RNA-binding domain, putative (AHRD V3.3 *** A0A061GJY5_THECC)
Solyc04g080360.3	SL3.0ch04	64652471	64652788	LastExon	UTR3	UTR3	5.17888	4.89321	5.57502	3.27967	3.25339	2.62317	1.70891	0.00181144	S-adenosyl-L-methionine-dependent methyltransferases superfamily protein (AHRD V3.3 *** AT1G19430.3)
Solyc04g081320.3	SL3.0ch04	65434122	65434678	Exon12	LastIntron	Intergenic	9.72276	8.2368	9.93947	5.64155	5.0793	4.78283	1.79951	0.00714353	Protein disulfide-isomerase LQY1, chloroplastic (AHRD V3.3 *-* LQY1_ARATH)
Solyc04g081470.3	SL3.0ch04	65519362	65519659	LastExon	LastExon	Intergenic	4.73866	4.61865	6.07269	3.07263	3.73478	2.79216	1.60736	0.0324102	Transcription factor CPC (AHRD V3.3 *-* A0A1D1ZLD7_9ARAE)
Solyc04g081900.3	SL3.0ch04	65852502	65852862	LastExon	LastExon	UTR3	2.48285	2.67807	2.48827	1.55547	1.54342	1.34529	1.72117	0.000342953	Cysteine/Histidine-rich C1 domain family protein (AHRD V3.3 --* AT2G44380.1)
Solyc04g082120.3	SL3.0ch04	65994679	65995396	UTR3	Intergenic	Intergenic	7.33387	5.3471	8.11489	4.00393	3.6312	3.08808	1.93933	0.0444185	Prolyl oligopeptidase family protein (AHRD V3.3 *** AT1G76140.1)
Solyc04g082130.3	SL3.0ch04	65994679	65995396	LastIntron	Intergenic	Intergenic	7.33387	5.3471	8.11489	4.00393	3.6312	3.08808	1.93933	0.0444185	Pseudouridine synthase family protein (AHRD V3.3 *** AT1G20410.1)
Solyc04g082330.3	SL3.0ch04	66121904	66122185	UTR3	UTR3	UTR3	6.74909	4.78491	7.20964	3.42753	3.46407	2.85241	1.9236	0.0482191	pre-rRNA-processing TSR1-like protein (AHRD V3.3 *** AT1G42440.1)
Solyc04g082640.3	SL3.0ch04	66340323	66340690	LastIntron	Intergenic	Intergenic	7.95569	6.81125	8.30838	5.0359	5.08908	4.4255	1.58588	0.0124018	Chloroplast inner membrane localized protein (AHRD V3.3 *** Q9C7S3_ARATH)
Solyc04g082950.3	SL3.0ch04	66502248	66502529	LastExon	LastExon	Intergenic	7.04183	7.03887	6.75825	3.09951	2.68989	3.19968	2.31825	0.000116427	glycosyltransferase family protein (DUF23) (AHRD V3.3 *** AT2G33570.1)
Solyc05g005180.3	SL3.0ch05	168192	168520	LastExon	LastExon	UTR3	13.767	9.08259	12.7824	6.83124	7.11249	5.32887	1.84884	0.0476128	enoyl-CoA hydratase/isomerase D (AHRD V3.3 *** AT1G60550.1)
Solyc05g005720.3	SL3.0ch05	536164	536509	LastExon	LastExon	UTR3	4.60542	4.59015	3.96507	2.95202	2.7426	2.53573	1.59904	0.00549387	Potassium transporter family protein (AHRD V3.3 *** AT1G60160.1)
Solyc05g006530.3	SL3.0ch05	1156707	1157025	UTR3	UTR3	UTR3	6.75292	4.69169	7.16226	4.15245	2.67774	3.37718	1.82289	0.046469	DEAD-box ATP-dependent RNA helicase ISE2 (AHRD V3.3 *** G7K5N2_MEDTR)
Solyc05g006540.3	SL3.0ch05	1156707	1157025	UTR3	UTR3	UTR3	6.75292	4.69169	7.16226	4.15245	2.67774	3.37718	1.82289	0.046469	Paired amphipathic helix SIN3-like protein (AHRD V3.3 *** G7LEQ2_MEDTR)
Solyc05g006650.3	SL3.0ch05	1311051	1311459	UTR3	UTR3	UTR3	4.58155	4.52996	5.22733	1.79077	1.98417	1.50137	2.71758	0.000841188	bHLH transcription factor 036
Solyc05g007060.3	SL3.0ch05	1644448	1644874	LastExon	UTR3	Intergenic	6.63015	5.35444	7.27903	4.59223	4.18005	3.94485	1.51478	0.0492737	Plant/T7N9-9 protein (AHRD V3.3 *** G7K9S8_MEDTR)
Solyc05g007100.3	SL3.0ch05	1676188	1676505	LastExon	LastExon	UTR3	8.94679	7.19455	8.90768	5.30542	5.31116	4.45508	1.66199	0.0150964	Single-stranded DNA-binding protein WHY1, chloroplastic (AHRD V3.3 *** WHY1_SOLTU)
Solyc05g007260.3	SL3.0ch05	1925346	1925740	LastExon	UTR3	UTR3	4.75762	4.76089	4.75257	3.37531	3.41689	2.63613	1.51364	0.0237962	Ribulose-phosphate 3-epimerase (AHRD V3.3 *** K4BWQ2_SOLLC)
Solyc05g008800.3	SL3.0ch05	3036068	3036446	LastExon	UTR3	UTR3	8.11373	7.36033	7.07571	3.93695	4.58329	3.33877	1.90149	0.00183019	Lipid phosphate phosphatase 2 family protein (AHRD V3.3 --* B9HWC6_POPTR)
Solyc05g009030.3	SL3.0ch05	3193928	3194465	LastExon	Intergenic	Intergenic	13.3421	10.7812	13.0852	7.41476	7.84551	6.6087	1.70143	0.0131215	3-isopropylmalate dehydrogenase (AHRD V3.3 *** K4BX77_SOLLC)
Solyc05g009370.3	SL3.0ch05	3518552	3518881	LastExon	UTR3	UTR3	4.92961	4.73302	4.75131	2.28741	3.06973	1.96714	1.96797	0.0159446	50S ribosomal protein L15 (AHRD V3.3 *** A0A072VRA4_MEDTR)
Solyc05g009390.3	SL3.0ch05	3544621	3544883	LastExon	UTR3	UTR3	5.68	5.61749	6.04163	2.65088	2.73325	2.61979	2.16633	0.00101497	alpha/beta-Hydrolases superfamily protein (AHRD V3.3 *** AT1G77420.1)
Solyc05g009870.3	SL3.0ch05	4076696	4077067	LastExon	UTR3	UTR3	9.04291	6.45853	9.24147	5.15977	4.75816	3.76286	1.80859	0.0372155	Transmembrane Fragile-X-F-associated protein (AHRD V3.3 *** AT1G68820.4)
Solyc05g010340.3	SL3.0ch05	4494820	4495043	LastExon	LastExon	UTR3	6.39344	6.89414	6.3292	4.18046	4.91071	3.90111	1.50988	0.00629201	Uridine kinase (AHRD V3.3 *** A0A0K9NRI5_ZOSMR)
Solyc05g010670.3	SL3.0ch05	4883308	4883765	LastExon	UTR3	Intergenic	3.36806	2.95949	3.38294	2.09247	1.97279	2.07036	1.58264	0.00947971	Heat shock family protein (AHRD V3.3 *** B9HWT4_POPTR)
Solyc05g012340.3	SL3.0ch05	5602048	5602381	LastExon	UTR3	Intergenic	9.90678	7.13928	10.8256	4.85199	4.92267	4.22372	1.99107	0.0480381	SPFH domain/band 7 family protein (AHRD V3.3 *** G7JHI5_MEDTR)
Solyc05g012710.3	SL3.0ch05	5899602	5899908	Exon2	Intron2	Intron2	6.47035	5.58294	6.33972	4.13704	4.28786	3.7264	1.51367	0.00569344	Transducin/WD40 repeat-like superfamily protein (AHRD V3.3 *-* A0A061EA43_THECC)
Solyc05g012940.3	SL3.0ch05	6059890	6060258	LastExon	Intergenic	Intergenic	7.43665	5.51121	6.85293	4.27367	3.97272	4.00222	1.61658	0.044249	ribonuclease H2 subunit B (AHRD V3.3 *** AT4G20325.1)
Solyc05g013940.3	SL3.0ch05	7411094	7411434	UTR3	UTR3	UTR3	5.13776	3.75171	4.28616	3.21373	2.90705	2.3349	1.5582	0.0385645	Actin-related family protein (AHRD V3.3 *** B9HTF8_POPTR)
Solyc05g014050.3	SL3.0ch05	7616283	7616945	LastExon	UTR3	UTR3	7.31003	6.56975	6.91799	4.06292	4.30852	3.47948	1.75495	0.000864433	Inner membrane protein (AHRD V3.3 *** S8C850_9LAMI)
Solyc05g014500.2	SL3.0ch05	8357151	8357399	Exon1	LastIntron	LastIntron	5.9308	4.91528	5.48907	3.93928	2.96721	3.69416	1.54096	0.00992543	ABC transporter family protein (AHRD V3.3 *-* B9GJX7_POPTR)
Solyc05g014790.3	SL3.0ch05	8965096	8965338	LastExon	UTR3	UTR3	2.65274	2.59666	3.01333	1.92701	1.73365	1.82964	1.50497	0.0100135	Lipoxygenase (AHRD V3.3 *** A0A0V0IV84_SOLCH)
Solyc05g015520.3	SL3.0ch05	10831389	10831726	LastExon	LastExon	Intergenic	4.99153	4.2774	5.11258	3.05294	3.32345	2.50675	1.61897	0.006764	F-box family protein (AHRD V3.3 *** B8Y9B5_PONTR)
Solyc05g015630.3	SL3.0ch05	11598567	11598862	Intron1	Exon2	UTR3	9.52504	7.02041	9.72021	5.24771	4.82012	4.25878	1.83335	0.0341673	Nuclear transport factor 2 (AHRD V3.3 *** NTF2_ARATH)
Solyc05g015640.3	SL3.0ch05	11598567	11598862	UTR3	UTR3	UTR3	9.52504	7.02041	9.72021	5.24771	4.82012	4.25878	1.83335	0.0341673	Ciliary neurotrophic factor (AHRD V3.3 *** A0A0B0PI91_GOSAR)
Solyc05g015650.3	SL3.0ch05	11600672	11601110	LastIntron	Intergenic	Intergenic	22.2648	16.3605	22.4027	11.7825	9.30301	10.233	1.94862	0.0269847	Calmodulin-binding transcription activator (AHRD V3.3 *** Q8S389_BRANA)
Solyc05g016330.3	SL3.0ch05	15590145	15590488	LastExon	LastExon	UTR3	11.8237	8.4147	13.859	4.35191	5.11586	3.92776	2.54542	0.0435808	Cytochrome P450 (AHRD V3.3 *** W9R369_9ROSA)
Solyc05g017860.3	SL3.0ch05	18737050	18737419	LastIntron	UTR3	UTR3	9.85523	8.20223	10.1104	5.01655	5.44321	3.98683	1.9498	0.00467472	Protein VAC14 like (AHRD V3.3 *** A0A0B2Q990_GLYSO)
Solyc05g023750.3	SL3.0ch05	29253692	29254398	LastIntron	LastExon	UTR3	7.48	6.49121	6.82118	4.06872	4.51357	3.41851	1.73258	0.00251115	ADP-ribosylation factor GTPase-activating protein (AHRD V3.3 *** G5DWI4_SILLA)
Solyc05g024415.1	SL3.0ch05	31658545	31658864	LastExon	LastExon	UTR3	4.54076	4.37094	5.28825	2.15642	2.35547	1.9371	2.20189	0.00508185	Galactose oxidase/kelch repeat protein (AHRD V3.3 *** G7IH11_MEDTR)
Solyc05g026550.3	SL3.0ch05	41748829	41749090	LastExon	UTR3	UTR3	6.93893	5.75332	7.3669	4.54276	3.9034	3.59619	1.66572	0.01486	NADH dehydrogenase-like complex L (AHRD V3.3 *** A0A0F7CYX9_9ROSI)
Solyc05g043353.1	SL3.0ch05	56877055	56877511	LastExon	LastExon	UTR3	17.6788	13.5645	18.6368	10.8069	9.76517	9.93453	1.63506	0.0482716	Centromere/kinetochore protein (ZW10), putative (AHRD V3.3 *** A0A061DLQ5_THECC)
Solyc05g049970.3	SL3.0ch05	60673607	60673977	LastExon	LastExon	UTR3	8.72993	7.01779	9.69661	5.13557	5.71712	4.96647	1.60845	0.0455579	mitogen-activated protein kinase 6
Solyc05g050020.3	SL3.0ch05	60773768	60774083	UTR3	UTR3	UTR3	8.4783	7.48943	9.03068	3.91918	4.74	3.76659	2.01182	0.00257608	RING/U-box superfamily protein (AHRD V3.3 *-* AT4G01270.1)
Solyc05g050800.3	SL3.0ch05	61835414	61835818	LastExon	UTR3	UTR3	3.00912	2.83075	2.84781	1.96099	2.03285	1.75854	1.51028	0.00106495	phosphoglycerate mutase family protein
Solyc05g050820.3	SL3.0ch05	61848927	61849175	LastExon	LastExon	UTR3	5.80886	6.06191	6.86824	2.47438	1.87303	1.57062	3.16643	0.000594514	DNAJ (AHRD V3.3 *** A0A061DUH3_THECC)
Solyc05g051630.3	SL3.0ch05	62863296	62863603	LastIntron	Intergenic	Intergenic	12.0997	9.55185	13.4212	6.85154	8.79525	6.71615	1.56834	0.0437663	RFT1-like protein (AHRD V3.3 *** A0A103Y8L2_CYNCS)
Solyc05g051994.1	SL3.0ch05	63194513	63195420	UTR3	Intron3	Intron3	6.69035	5.48852	6.30003	4.14431	3.98994	3.83082	1.5444	0.0202091	RNA-binding family protein (AHRD V3.3 *-* B9I063_POPTR)
Solyc05g052160.3	SL3.0ch05	63302699	63303076	LastExon	UTR3	UTR3	6.17836	4.70423	6.6016	3.29511	4.03103	2.81852	1.72349	0.0305155	Translocase of chloroplast (AHRD V3.3 *** K4C1P7_SOLLC)
Solyc05g052170.3	SL3.0ch05	63311586	63311878	UTR3	UTR3	UTR3	7.58062	5.41764	8.14858	4.13186	4.4093	2.93756	1.84226	0.0405809	Acyl-CoA N-acyltransferases (NAT) superfamily protein (AHRD V3.3 *** AT4G19985.6)
Solyc05g052180.3	SL3.0ch05	63311586	63311878	LastExon	UTR3	UTR3	7.58062	5.41764	8.14858	4.13186	4.4093	2.93756	1.84226	0.0405809	Eukaryotic translation initiation factor 1A (AHRD V3.3 --* IF1A_ONOVI)
Solyc05g052760.3	SL3.0ch05	63809187	63809537	Exon9	Exon9	UTR3	3.20203	2.74634	3.45697	1.79716	1.64459	1.39167	1.94589	0.00659962	Phosphoinositide phospholipase C (AHRD V3.3 *** O49952_SOLTU)
Solyc05g052920.3	SL3.0ch05	63944738	63945219	Exon15	LastIntron	Intergenic	7.64371	6.51324	7.5795	4.66818	5.41922	4.1567	1.526	0.00854195	Folylpolyglutamate synthase (AHRD V3.3 *** K4C1X2_SOLLC)
Solyc05g053040.3	SL3.0ch05	64045992	64046568	LastExon	LastExon	Intergenic	12.8982	11.0149	12.8636	8.17241	8.58297	6.82995	1.5593	0.00618396	RING/U-box superfamily protein (AHRD V3.3 *** AT3G55530.1)
Solyc05g053670.3	SL3.0ch05	64578025	64578405	LastIntron	LastExon	UTR3	8.09779	6.96383	8.40396	5.03958	5.25913	4.53954	1.58143	0.0107109	60S ribosomal protein L13a-like protein (AHRD V3.3 *** Q3HRW1_SOLTU)
Solyc05g053710.3	SL3.0ch05	64602828	64603210	LastIntron	LastExon	Intergenic	15.6982	13.0685	17.3069	10.3827	11.0788	8.75365	1.52485	0.0309838	Ypt/Rab-GAP domain of gyp1p superfamily protein (AHRD V3.3 *** AT4G13730.1)
Solyc05g053715.1	SL3.0ch05	64602828	64603210	LastIntron	LastIntron	Intergenic	15.6982	13.0685	17.3069	10.3827	11.0788	8.75365	1.52485	0.0309838	Serinc-domain containing serine and sphingolipid biosynthesis protein (AHRD V3.3 --* AT1G16180.2)
Solyc05g053780.3	SL3.0ch05	64661650	64661965	Intron4	Intron4	LastIntron	2.68104	2.2266	3.10489	1.27985	1.12678	1.41414	2.0971	0.022624	RNA binding protein-like protein (AHRD V3.3 *** Q3HVL3_SOLTU)
Solyc05g054220.3	SL3.0ch05	65026911	65027204	LastExon	UTR3	UTR3	4.94355	5.11708	4.80302	2.19659	2.35598	2.01662	2.26263	3.373e-05	SNF1-related kinase complex anchoring protein
Solyc05g054520.3	SL3.0ch05	65278945	65279255	LastExon	LastExon	UTR3	5.49338	4.866	6.12382	3.10106	3.51072	3.12599	1.69271	0.0160479	Geranylgeranyl transferase type-1 subunit beta (AHRD V3.3 *** W9SPR0_9ROSA)
Solyc05g054540.3	SL3.0ch05	65291721	65292051	LastIntron	LastExon	Intergenic	7.49919	6.75377	8.05648	5.0833	4.91535	4.24589	1.56618	0.00613728	ubiquitin-conjugating enzyme E2 (AHRD V3.3 *** AT5G59300.1)
Solyc05g054720.3	SL3.0ch05	65430786	65431206	LastExon	LastExon	Intergenic	5.51771	4.8813	5.85625	3.61574	3.71617	3.28508	1.53106	0.0113766	Protein TIC 20, chloroplastic (AHRD V3.3 *** A0A0B2STH9_GLYSO)
Solyc05g055260.3	SL3.0ch05	65824504	65824894	LastIntron	UTR3	UTR3	8.13191	7.14067	8.8853	5.40963	5.68322	4.78814	1.52118	0.0165709	Small nuclear ribonucleoprotein family protein (AHRD V3.3 *** AT3G11500.2)
Solyc05g055760.3	SL3.0ch05	66117946	66118218	UTR3	UTR3	Intergenic	4.18008	3.64253	4.05654	3.30693	2.2899	2.30693	1.50297	0.0405519	isopentenyl diphosphate isomerase
Solyc05g056150.3	SL3.0ch05	66394328	66394574	LastExon	UTR3	UTR3	21.8618	16.3923	21.9188	9.27663	8.73799	8.32107	2.28485	0.0233097	1-(5-phosphoribosyl)-5-[(5-phosphoribosylamino)methylideneamino] imidazole-4-carboxamide isomerase (AHRD V3.3 *** W9RG35_9ROSA)
Solyc05g056385.1	SL3.0ch05	66561738	66562085	Intron2	Intron2	Intron2	8.98085	7.38883	9.13629	5.71671	4.87737	4.79448	1.65746	0.0124716	Protein disulfide-isomerase (AHRD V3.3 *** K4C2W4_SOLLC)
Solyc05g056390.2	SL3.0ch05	66561738	66562085	LastIntron	LastExon	UTR3	8.98085	7.38883	9.13629	5.71671	4.87737	4.79448	1.65746	0.0124716	10 kDa chaperonin (AHRD V3.3 *** CH10_BRANA)
Solyc05g056530.3	SL3.0ch05	66653190	66653461	LastExon	LastExon	UTR3	21.1326	17.4528	24.7584	10.7742	11.2334	9.41036	2.01617	0.0304926	DDT domain-containing protein (AHRD V3.3 *** A0A103XFB7_CYNCS)
Solyc06g005150.3	SL3.0ch06	170231	170632	Exon9	UTR3	UTR3	4.45971	4.37023	4.82864	2.97039	3.02327	2.55194	1.59832	0.00115546	Ascorbate peroxidase (AHRD V3.3 *** Q52QQ4_SOLLC)
Solyc06g005290.3	SL3.0ch06	295477	295916	LastExon	UTR3	UTR3	13.0449	10.9169	12.8605	7.74946	8.0114	6.8666	1.62733	0.00872029	UDP-galactose transporter 5 (AHRD V3.3 *** AT3G46180.1)
Solyc06g005380.3	SL3.0ch06	394762	395079	UTR3	UTR3	Intergenic	13.5287	11.1521	14.3486	5.01656	4.95356	4.08276	2.77733	0.00815084	F-box family protein (AHRD V3.3 *** B9H9Z2_POPTR)
Solyc06g006080.3	SL3.0ch06	1110751	1111395	Intron5	LastExon	Intergenic	4.2935	4.54803	4.02201	2.07394	2.49868	1.75671	2.03237	0.00181523	thiamine biosynthesis protein ThiC
Solyc06g006100.3	SL3.0ch06	1136342	1136963	LastExon	LastExon	Intergenic	4.65493	4.51818	4.58329	2.53215	2.81291	2.24874	1.81153	0.00429323	Anthranilate synthase (AHRD V3.3 *** A0A0K9NQE9_ZOSMR)
Solyc06g007520.3	SL3.0ch06	1513140	1513413	LastIntron	LastExon	UTR3	4.14952	3.82232	4.30724	2.15555	2.52936	1.88035	1.87031	0.00171432	60S ribosomal protein L10 (AHRD V3.3 *** RL10_SOLME)
Solyc06g008110.3	SL3.0ch06	1992211	1992739	LastExon	UTR3	UTR3	13.8465	10.2035	14.7574	8.04777	7.25204	6.63423	1.76928	0.0466365	Transducin/WD40 repeat-like superfamily protein (AHRD V3.3 *** AT2G20330.1)
Solyc06g008290.3	SL3.0ch06	2159068	2159388	LastIntron	LastExon	Intergenic	9.75957	8.3977	9.7361	5.02546	4.49773	3.99271	2.06375	0.00166107	Vacuolar protein sorting-associated protein 2 homolog 2 (AHRD V3.3 *** VPS2B_ARATH)
Solyc06g008960.3	SL3.0ch06	2892422	2892759	LastExon	LastExon	UTR3	7.55202	5.60112	7.13195	4.69991	4.53771	3.57214	1.58356	0.0318207	Mediator of RNA polymerase II transcription subunit 33A (AHRD V3.3 *** G7IKE7_MEDTR)
Solyc06g010033.1	SL3.0ch06	4791220	4791434	LastExon	LastExon	UTR3	13.1102	11.4568	12.8569	3.95243	4.12088	3.92557	3.11896	0.00328898	MLO-like protein (AHRD V3.3 *** K4C430_SOLLC)
Solyc06g011560.3	SL3.0ch06	8115378	8115738	LastIntron	LastExon	Intergenic	6.08227	4.80829	6.63341	3.63286	4.4847	3.05674	1.56824	0.0392768	transmembrane protein (AHRD V3.3 *** AT1G70505.4)
Solyc06g011570.3	SL3.0ch06	8115378	8115738	UTR3	UTR3	UTR3	6.08227	4.80829	6.63341	3.63286	4.4847	3.05674	1.56824	0.0392768	haloacid dehalogenase-like hydrolase family protein (AHRD V3.3 *-* AT2G25870.1)
Solyc06g016750.3	SL3.0ch06	13142473	13142912	LastIntron	UTR3	UTR3	15.9325	11.3248	16.9681	7.17516	7.74344	6.60254	2.05498	0.0444448	nuclear factor Y, subunit C10 (AHRD V3.3 *-* AT1G07980.1)
Solyc06g019170.3	SL3.0ch06	17989983	17990481	LastIntron	UTR3	UTR3	17.9406	13.5438	19.4647	8.82407	8.80564	7.47339	2.02959	0.033431	Delta-1-pyrroline-5-carboxylate synthetase (AHRD V3.3 *** G3M3X3_SOLTO)
Solyc06g030490.3	SL3.0ch06	18933247	18933632	LastIntron	UTR3	UTR3	15.8988	11.9355	17.4267	8.63515	8.55929	7.36966	1.84257	0.044819	Serine/threonine-protein phosphatase (AHRD V3.3 *** A0A0V0HV59_SOLCH)
Solyc06g035430.3	SL3.0ch06	24400195	24400444	LastExon	UTR3	UTR3	22.7704	19.8265	24.8435	13.7955	13.6479	11.4259	1.73505	0.00997295	AT hook motif DNA-binding family protein (AHRD V3.3 *** AT4G25320.1)
Solyc06g036070.3	SL3.0ch06	25542366	25542916	UTR3	UTR3	UTR3	9.93301	7.64633	10.3127	5.33339	6.1663	4.43495	1.7504	0.0220838	SKP1 family protein (AHRD V3.3 *** B9I474_POPTR)
Solyc06g036350.3	SL3.0ch06	26010744	26011129	LastExon	LastExon	UTR3	5.28854	4.37986	5.57462	3.59506	3.60828	2.95581	1.50042	0.0232196	NADH-ubiquinone oxidoreductase-like protein (AHRD V3.3 *** AT5G52840.1)
Solyc06g036420.2	SL3.0ch06	26066525	26066748	LastExon	LastExon	UTR3	7.69257	5.90868	6.04744	3.42798	2.87669	2.98637	2.1148	0.019627	SGT1 (AHRD V3.3 *** A0A023GU62_CAPAN)
Solyc06g036430.3	SL3.0ch06	26071758	26072089	LastExon	LastExon	UTR3	3.38252	3.08925	3.59074	2.06917	2.34839	1.90905	1.59051	0.00319056	Reticulon-like protein (AHRD V3.3 *** K4C509_SOLLC)
Solyc06g042950.3	SL3.0ch06	30542506	30542892	UTR3	UTR3	UTR3	11.9841	9.3268	12.2307	6.88695	7.41718	5.89691	1.66039	0.0250443	SANT domain-containing protein 2 (AHRD V3.3 *** A0A1D1YHB5_9ARAE)
Solyc06g048540.3	SL3.0ch06	31295497	31295948	LastExon	UTR3	UTR3	8.86357	7.01583	8.97875	5.2938	5.75807	4.69128	1.57898	0.0249257	ABC transporter family protein (AHRD V3.3 *** A0A097P9T8_HEVBR)
Solyc06g050590.3	SL3.0ch06	33376072	33376619	LastIntron	UTR3	Intergenic	13.5691	10.5693	14.4827	7.99529	8.19206	6.93708	1.67014	0.0378462	Biotin carboxyl carrier protein (AHRD V3.3 *** A0A0H5BV69_PEA)
Solyc06g050880.3	SL3.0ch06	33818154	33818429	LastExon	LastExon	UTR3	8.46951	6.55413	8.24843	4.77453	6.0562	4.03563	1.56542	0.0295446	Protein kinase superfamily protein (AHRD V3.3 --* AT5G02290.2)
Solyc06g050930.3	SL3.0ch06	33974437	33974796	LastExon	LastExon	UTR3	8.39346	7.29773	9.25591	5.84198	5.35711	5.16397	1.5246	0.0263381	Cytosolic endo-beta-N-acetylglucosaminidase (AHRD V3.3 *** A0A0B0NZD9_GOSAR)
Solyc06g051030.3	SL3.0ch06	34220175	34220610	LastExon	LastExon	UTR3	5.65407	5.27455	5.86756	3.95837	4.17475	3.00781	1.50761	0.0194539	Protein kinase family protein, putative, expressed (AHRD V3.3 *** A0A0K9Q4P0_ZOSMR)
Solyc06g051160.3	SL3.0ch06	34407926	34408280	LastIntron	UTR3	UTR3	21.5487	17.9197	22.4403	13.8114	15.0621	12.0763	1.51182	0.0185491	DnaJ/Hsp40 cysteine-rich domain superfamily protein, putative (AHRD V3.3 *** A0A061FJK4_THECC)
Solyc06g051310.3	SL3.0ch06	34636636	34637089	LastExon	LastExon	UTR3	3.45669	3.32452	3.56682	2.37479	2.4409	2.03803	1.50984	0.00324184	Clathrin heavy chain (AHRD V3.3 *** K4C5S4_SOLLC)
Solyc06g051390.3	SL3.0ch06	34821235	34821679	LastIntron	LastExon	UTR3	36.6767	25.5498	40.4215	13.9705	15.2754	13.9558	2.37602	0.0460211	Transducin family protein / WD-40 repeat family protein, putative isoform 5 (AHRD V3.3 *** A0A061EQ99_THECC)
Solyc06g053300.3	SL3.0ch06	36114611	36114993	LastIntron	UTR3	UTR3	10.9916	9.3866	10.5477	5.27426	5.46917	4.07433	2.08709	0.00119732	RNA-binding protein, putative (AHRD V3.3 *** B9T1D4_RICCO)
Solyc06g060100.3	SL3.0ch06	38122699	38123000	LastExon	UTR3	UTR3	11.8577	10.2131	11.8637	6.10472	7.17252	5.78641	1.78006	0.00257249	Mannose-6-phosphate isomerase (AHRD V3.3 *** K4C6J1_SOLLC)
Solyc06g060150.3	SL3.0ch06	38233466	38233734	LastExon	LastExon	UTR3	7.01678	6.49365	7.78971	4.074	3.90651	2.98537	1.9424	0.00253715	replication factor C subunit 3 (AHRD V3.3 *** AT1G77470.1)
Solyc06g060160.2	SL3.0ch06	38233466	38233734	UTR3	Intergenic	Intergenic	7.01678	6.49365	7.78971	4.074	3.90651	2.98537	1.9424	0.00253715	U-box domain-containing protein 13 (AHRD V3.3 *** W9R751_9ROSA)
Solyc06g060940.2	SL3.0ch06	39050970	39051327	LastExon	LastExon	UTR3	9.25348	7.08117	9.68171	5.59033	4.91413	4.26511	1.76148	0.0269566	GATA transcription factor, putative (AHRD V3.3 *** B9SYZ6_RICCO)
Solyc06g062350.3	SL3.0ch06	39434471	39434813	LastIntron	UTR3	UTR3	18.3923	15.5248	21.6842	10.4699	9.88772	9.49508	1.86252	0.0375243	RuvB-like helicase (AHRD V3.3 *** K4C6W6_SOLLC)
Solyc06g062590.3	SL3.0ch06	39620812	39621051	UTR3	UTR3	UTR3	1.64905	1.45737	1.52641	0.885574	1.12506	0.792631	1.65266	0.0110906	Transmembrane 9 superfamily member (AHRD V3.3 *** A0A0V0IMM7_SOLCH)
Solyc06g065320.3	SL3.0ch06	40853837	40854190	UTR3	UTR3	UTR3	4.55614	3.84508	4.49832	2.85224	3.12894	2.51652	1.518	0.00827008	Disulfide isomerase-like protein (AHRD V3.3 *** A0A061FKQ2_THECC)
Solyc06g065330.3	SL3.0ch06	40853837	40854190	UTR3	UTR3	UTR3	4.55614	3.84508	4.49832	2.85224	3.12894	2.51652	1.518	0.00827008	RING/U-box superfamily protein (AHRD V3.3 *** AT1G35625.1)
Solyc06g065335.1	SL3.0ch06	40853837	40854190	Intergenic	Intergenic	Exon1	4.55614	3.84508	4.49832	2.85224	3.12894	2.51652	1.518	0.00827008	small RNA degrading nuclease 1 (AHRD V3.3 --* AT3G50100.2)
Solyc06g065475.1	SL3.0ch06	40982314	40982769	LastIntron	Intergenic	Intergenic	9.78305	7.87041	10.0246	5.21551	5.66863	4.75425	1.76988	0.0173162	RNA-binding family protein (AHRD V3.3 *** A0A061GTK7_THECC)
Solyc06g065650.3	SL3.0ch06	41177457	41177907	LastExon	LastExon	UTR3	5.32739	5.39191	6.5116	3.76661	4.13302	3.555	1.50427	0.0235866	Protein TIFY 8 (AHRD V3.3 *** A0A151RAB6_CAJCA)
Solyc06g065800.3	SL3.0ch06	41353703	41353966	Exon3	UTR3	UTR3	12.7194	10.7351	11.4986	6.05722	6.45447	4.55941	2.0475	0.00187311	Mitochondrial glycoprotein family protein (AHRD V3.3 *** AT4G31930.1)
Solyc06g065980.3	SL3.0ch06	41475525	41475977	LastExon	LastExon	Intergenic	13.8754	10.0864	13.4388	8.20948	7.53197	6.72057	1.66506	0.0406817	Alba DNA/RNA-binding protein (AHRD V3.3 *** AT2G34160.1)
Solyc06g066030.3	SL3.0ch06	41507873	41508299	UTR3	UTR3	UTR3	7.3932	6.94221	7.88982	4.7421	5.15426	4.06805	1.59156	0.00296879	TPX2 (targeting protein for Xklp2) protein family (AHRD V3.3 *** AT4G32330.4)
Solyc06g066310.3	SL3.0ch06	41707922	41708308	LastExon	UTR3	UTR3	11.2224	7.9288	10.6827	6.01696	5.22278	5.5006	1.78216	0.0445102	Phosphomevalonate kinase (AHRD V3.3 *** A0A0X9ZV04_9ROSI)
Solyc06g066610.3	SL3.0ch06	41966229	41966683	LastIntron	Intergenic	Intergenic	13.2012	9.82505	15.3427	6.40593	8.6275	5.71516	1.84923	0.0468446	Golgin candidate 5 (AHRD V3.3 *** GOGC5_ARATH)
Solyc06g068010.3	SL3.0ch06	42276897	42277204	LastIntron	LastExon	UTR3	13.4663	10.2	14.2931	7.02209	8.08787	6.59095	1.74921	0.0372262	Biotin carboxyl carrier protein (AHRD V3.3 *** A0A0H5BV69_PEA)
Solyc06g068220.3	SL3.0ch06	42383995	42384359	UTR3	UTR3	UTR3	6.83442	6.30886	6.29825	3.93913	4.71028	3.6981	1.57453	0.00547213	alpha/beta-Hydrolases superfamily protein (AHRD V3.3 *** AT1G52510.1)
Solyc06g068570.3	SL3.0ch06	42621681	42622070	Exon5	Exon5	LastIntron	6.61095	5.61985	6.67429	4.10838	3.92276	2.79711	1.7459	0.00787496	AP2-like ethylene-responsive transcription factor
Solyc06g068740.3	SL3.0ch06	42735074	42735474	LastIntron	Intergenic	Intergenic	6.54616	5.07874	6.58096	3.11544	3.62527	2.5463	1.96036	0.011034	NAD(P)-binding Rossmann-fold superfamily protein (AHRD V3.3 *-* AT5G61830.2)
Solyc06g068760.3	SL3.0ch06	42735074	42735474	LastIntron	LastExon	UTR3	6.54616	5.07874	6.58096	3.11544	3.62527	2.5463	1.96036	0.011034	Chromophore lyase CpcT/CpeT 3 (AHRD V3.3 *** A0A0B0NHE8_GOSAR)
Solyc06g069020.3	SL3.0ch06	42950520	42950967	LastIntron	UTR3	UTR3	8.52833	6.5931	9.09235	5.10725	4.61076	4.61679	1.68916	0.0435212	Elongation factor 1 alpha (AHRD V3.3 *** A0A1B2LUN9_9CARY)
Solyc06g069190.3	SL3.0ch06	43074585	43074890	LastIntron	UTR3	UTR3	5.6411	4.77903	5.2157	3.41596	3.86496	2.66887	1.57147	0.0143662	Eukaryotic aspartyl protease family protein (AHRD V3.3 *** AT1G49050.1)
Solyc06g069440.3	SL3.0ch06	43315293	43315697	UTR3	UTR3	UTR3	3.78815	3.81363	3.56231	2.09439	2.24689	2.01495	1.7564	0.000126238	Zinc finger transcription factor 45
Solyc06g069470.3	SL3.0ch06	43342878	43343331	LastExon	LastExon	Intergenic	7.48643	6.47586	7.75625	4.56807	3.72676	3.90169	1.78072	0.00406605	Glycerophosphoryl diester phosphodiesterase family protein (AHRD V3.3 *** A0A072URQ0_MEDTR)
Solyc06g069520.3	SL3.0ch06	43411121	43411460	LastIntron	LastExon	UTR3	2.53614	2.35467	2.55343	1.57598	1.5358	1.57695	1.58769	0.00347198	asterix-like protein (AHRD V3.3 *** AT5G07960.1)
Solyc06g071280.3	SL3.0ch06	43994169	43994461	Intron3	Intron3	Intergenic	2.67386	2.93779	2.6552	1.54495	1.42129	1.13173	2.0173	0.00115824	protein EDS1
Solyc06g071350.3	SL3.0ch06	44060240	44060723	LastExon	Intergenic	Intergenic	3.00427	3.10497	2.91625	2.02055	2.13088	1.82501	1.51018	0.00153231	BAH domain-containing protein, putative (AHRD V3.3 *** Q53J12_SOLLC)
Solyc06g071420.3	SL3.0ch06	44086287	44086622	LastExon	LastExon	UTR3	7.20423	6.51372	7.16921	3.47655	3.78816	3.17807	2.00015	0.000354503	RING/U-box superfamily protein (AHRD V3.3 *-* AT3G61180.1)
Solyc06g071440.3	SL3.0ch06	44100178	44101020	LastExon	Intergenic	Intergenic	9.48086	7.95333	10.0613	5.64752	5.90444	5.14355	1.64688	0.0196784	CASP-like protein (AHRD V3.3 *** K4C8L6_SOLLC)
Solyc06g071450.3	SL3.0ch06	44100178	44101020	LastExon	UTR3	UTR3	9.48086	7.95333	10.0613	5.64752	5.90444	5.14355	1.64688	0.0196784	General transcription factor IIH subunit, putative (AHRD V3.3 *** G7J304_MEDTR)
Solyc06g071460.3	SL3.0ch06	44111106	44111450	LastExon	LastExon	Intergenic	7.91979	6.73198	8.33136	4.5943	5.19749	3.69291	1.70439	0.00834035	Exosome complex exonuclease RRP40 (AHRD V3.3 *** B7FLI0_MEDTR)
Solyc06g071470.3	SL3.0ch06	44111106	44111450	Exon8	Intron8	Intron8	7.91979	6.73198	8.33136	4.5943	5.19749	3.69291	1.70439	0.00834035	Peroxisomal membrane protein PEX14 (AHRD V3.3 *** W9RQB1_9ROSA)
Solyc06g071580.3	SL3.0ch06	44223008	44223424	LastIntron	LastExon	Intergenic	21.7508	17.3985	20.6831	13.2449	14.8299	9.7741	1.58082	0.0216524	MORC family CW-type zinc finger protein 4 (AHRD V3.3 *** A0A0B0PTV2_GOSAR)
Solyc06g071920.3	SL3.0ch06	44449900	44450232	LastExon	UTR3	UTR3	5.04516	4.44188	5.46548	2.61696	2.90689	2.35504	1.8978	0.00560331	Glyceraldehyde-3-phosphate dehydrogenase (AHRD V3.3 *** C9DRQ8_SOLCH)
Solyc06g072160.3	SL3.0ch06	44625042	44625372	LastExon	LastExon	Intergenic	8.74163	7.11517	9.52319	5.09032	5.85668	4.34425	1.65977	0.022461	Alcohol dehydrogenase family protein (AHRD V3.3 *** B9H299_POPTR)
Solyc06g072300.3	SL3.0ch06	44712229	44712580	LastExon	UTR3	UTR3	4.22355	3.66021	4.21496	2.516	2.67692	2.35923	1.60202	0.00585249	Argonaute 1
Solyc06g072600.3	SL3.0ch06	44915229	44915540	LastExon	LastExon	UTR3	4.5305	3.59073	3.99984	2.4891	2.5272	2.33622	1.64856	0.0238925	Mitochondrial import inner membrane translocase subunit (AHRD V3.3 *** F2VPS7_SOLNI)
Solyc06g072720.3	SL3.0ch06	44990590	44990956	LastExon	UTR3	UTR3	5.50323	4.93142	5.06867	3.33323	3.71355	3.02403	1.53943	0.00253508	Zinc finger transcription factor 47
Solyc06g073240.3	SL3.0ch06	45272759	45273084	LastExon	UTR3	Intergenic	7.82844	6.45636	7.21242	4.50257	5.59904	3.76703	1.55006	0.0215097	Carbohydrate esterase plant-like protein (AHRD V3.3 *** A0A072W1E8_MEDTR)
Solyc06g074380.3	SL3.0ch06	46143265	46143567	LastExon	UTR3	UTR3	5.93572	4.764	5.83592	3.938	4.09928	2.8754	1.51527	0.0250932	S-adenosyl-L-methionine-dependent methyltransferases superfamily protein (AHRD V3.3 *** AT2G27590.1)
Solyc06g074463.1	SL3.0ch06	46217357	46217637	LastExon	Intergenic	Intergenic	6.08274	5.85724	5.88033	3.64378	3.19829	3.71387	1.68818	0.00128192	Peroxisome biogenesis protein 16 (AHRD V3.3 *-* A0A0B2P914_GLYSO)
Solyc06g076150.3	SL3.0ch06	47418871	47419295	LastExon	UTR3	UTR3	4.59942	4.75851	5.10127	3.055	3.40473	2.7976	1.56192	0.00185655	Eukaryotic translation initiation factor 3 subunit C (AHRD V3.3 *** K4C9X5_SOLLC)
Solyc06g076400.3	SL3.0ch06	47617201	47617617	UTR3	UTR3	Intergenic	6.80603	6.17951	7.32028	3.39308	3.67162	3.15772	1.9864	0.00357269	Protein phosphatase 2C (AHRD V3.3 *** A0A103XPQ7_CYNCS)
Solyc06g076410.3	SL3.0ch06	47617201	47617617	LastIntron	UTR3	UTR3	6.80603	6.17951	7.32028	3.39308	3.67162	3.15772	1.9864	0.00357269	sterol 4-alpha-methyl-oxidase 2-1 (AHRD V3.3 *** AT1G07420.1)
Solyc06g076660.3	SL3.0ch06	47751752	47752079	UTR3	UTR3	UTR3	7.22941	5.83917	7.52532	4.63121	4.30262	3.95673	1.5976	0.0269218	proliferating cell nuclear antigen
Solyc06g076665.1	SL3.0ch06	47751752	47752079	LastExon	LastExon	UTR3	7.22941	5.83917	7.52532	4.63121	4.30262	3.95673	1.5976	0.0269218	Enolase (AHRD V3.3 *-* A0A103XTK2_CYNCS)
Solyc06g082120.3	SL3.0ch06	48090652	48090927	UTR3	UTR3	UTR3	1.9388	1.65698	1.96167	1.21029	1.12268	1.29347	1.53248	0.0103209	RAN binding protein 1 (AHRD V3.3 *-* AT5G58590.1)
Solyc06g082160.3	SL3.0ch06	48115123	48115485	UTR3	UTR3	UTR3	9.75597	7.64575	8.62416	3.94324	4.5431	3.56449	2.15968	0.00741431	SAGA-associated factor 11 (AHRD V3.3 *** K4CA75_SOLLC)
Solyc06g082480.3	SL3.0ch06	48318679	48318937	UTR3	UTR3	UTR3	12.3873	10.1569	11.8456	7.29258	8.18452	5.87409	1.61067	0.0102455	Nucleotidyltransferase domain containing protein, expressed (AHRD V3.3 *-* A0A0K9PR62_ZOSMR)
Solyc06g082600.3	SL3.0ch06	48411754	48412141	LastExon	Intergenic	Intergenic	5.53259	4.98398	5.72981	3.06717	3.42328	2.74646	1.75885	0.00150751	Ubiquitin-conjugating enzyme E2-like protein (AHRD V3.3 *** Q2PYY4_SOLTU)
Solyc06g082800.3	SL3.0ch06	48512902	48513352	LastExon	UTR3	Intergenic	13.0884	10.6552	13.0297	7.94846	8.76826	6.67702	1.57193	0.0133299	Mitochondrial import receptor subunit tom40, putative (AHRD V3.3 *** B9RGH8_RICCO)
Solyc06g083270.3	SL3.0ch06	48803577	48803842	LastIntron	LastExon	UTR3	14.1861	10.7589	15.1488	8.68249	8.86813	6.62776	1.65825	0.0378881	ER lumen retaining receptor family-like protein (AHRD V3.3 *** Q38JH5_SOLTU)
Solyc06g083820.3	SL3.0ch06	49172604	49172890	LastIntron	LastExon	UTR3	9.83801	8.71394	9.88415	5.1695	5.79378	4.28172	1.86527	0.00177017	60S ribosomal protein L14, putative (AHRD V3.3 *** B9SS61_RICCO)
Solyc06g083830.3	SL3.0ch06	49172604	49172890	UTR3	UTR3	UTR3	9.83801	8.71394	9.88415	5.1695	5.79378	4.28172	1.86527	0.00177017	Casein kinase, putative (AHRD V3.3 *** B9SS69_RICCO)
Solyc06g084290.3	SL3.0ch06	49520222	49520839	LastExon	UTR3	UTR3	2.61484	2.62302	2.27373	1.3628	1.45235	1.13784	1.90023	0.00157071	trichome birefringence-like protein (DUF828) (AHRD V3.3 *** AT3G06080.2)
Solyc07g005450.3	SL3.0ch07	356199	356876	LastExon	UTR3	Intergenic	17.7706	15.2128	17.4609	10.3449	10.5808	10.052	1.6284	0.0127282	RNA polymerase II C-terminal domain phosphatase-like protein (AHRD V3.3 *** A0A0K9Q1D5_ZOSMR)
Solyc07g005460.3	SL3.0ch07	365269	365738	Exon10	LastIntron	LastIntron	16.0242	13.2347	15.8878	9.59387	10.8644	8.98811	1.53318	0.012757	RNA polymerase II C-terminal domain phosphatase-like protein (AHRD V3.3 *** A0A0K9Q1D5_ZOSMR)
Solyc07g006160.3	SL3.0ch07	1002812	1003210	LastIntron	LastExon	Intergenic	10.4291	9.14373	10.9177	6.82205	6.40839	5.89602	1.59415	0.00807086	Lactation elevated protein 1 (AHRD V3.3 *** W9RT81_9ROSA)
Solyc07g006200.3	SL3.0ch07	1026857	1027279	LastIntron	UTR3	Intergenic	10.4916	9.07347	11.3597	5.25563	6.08749	4.77392	1.91876	0.00631339	Metal-dependent phosphohydrolase HD domain-containing protein (AHRD V3.3 *** D7LG30_ARALL)
Solyc07g006270.3	SL3.0ch07	1066330	1066664	Intron5	Exon6	LastIntron	9.14215	7.76725	9.55686	5.86644	5.40807	4.93914	1.63234	0.0116765	Cytochrome c oxidase subunit 6B (AHRD V3.3 *-* A0A151TZY7_CAJCA)
Solyc07g006340.3	SL3.0ch07	1152601	1152868	LastExon	UTR3	UTR3	3.43391	2.95732	3.18748	1.79121	2.30038	1.72636	1.6464	0.00651057	Acyl-CoA N-acyltransferase (AHRD V3.3 *** A0A103YMJ3_CYNCS)
Solyc07g006760.3	SL3.0ch07	1598962	1599521	LastExon	UTR3	UTR3	3.96781	3.38179	3.67706	2.31025	2.36492	2.46194	1.54498	0.0122793	MAP kinase kinase kinase 43
Solyc07g008300.2	SL3.0ch07	3078251	3078581	LastExon	Intergenic	Intergenic	8.03614	7.22204	8.6698	5.05138	5.23034	4.72841	1.59412	0.0119832	Choline monooxygenase (AHRD V3.3 *** D2DEK9_LYCBA)
Solyc07g008310.3	SL3.0ch07	3078251	3078581	LastIntron	LastExon	UTR3	8.03614	7.22204	8.6698	5.05138	5.23034	4.72841	1.59412	0.0119832	Choline monooxygenase (AHRD V3.3 *** D2DEK9_LYCBA)
Solyc07g008320.3	SL3.0ch07	3078251	3078581	UTR3	UTR3	UTR3	8.03614	7.22204	8.6698	5.05138	5.23034	4.72841	1.59412	0.0119832	Calcium-transporting ATPase (AHRD V3.3 *** B9HAW9_POPTR)
Solyc07g008760.3	SL3.0ch07	3728532	3728962	UTR3	UTR3	UTR3	9.26528	9.21528	10.384	5.89537	5.69801	4.75439	1.76566	0.00133651	Tetratricopeptide repeat-containing protein (AHRD V3.3 *** D7LWY8_ARALL)
Solyc07g017290.3	SL3.0ch07	6651099	6651530	Exon3	UTR3	LastIntron	11.9977	8.75336	12.3169	7.28555	5.57446	6.68269	1.69209	0.0417133	3-phosphoinositide-dependent protein kinase-1 (AHRD V3.3 *** B9HBB3_POPTR)
Solyc07g017500.3	SL3.0ch07	7385988	7386324	LastExon	LastExon	UTR3	5.34787	4.19243	5.33766	2.63625	2.88987	2.33272	1.89315	0.0148713	SH3 domain-containing protein (AHRD V3.3 *** W9RVR7_9ROSA)
Solyc07g017510.3	SL3.0ch07	7416111	7416780	LastExon	LastExon	Intergenic	5.64543	4.85274	5.89825	3.28605	3.03606	2.94618	1.76909	0.0110739	1-phosphatidylinositol-3-phosphate 5-kinase (AHRD V3.3 *** W9RVS2_9ROSA)
Solyc07g017520.3	SL3.0ch07	7454664	7455629	Intron6	UTR3	UTR3	16.9318	12.5726	17.1939	8.88463	9.67997	8.11118	1.75059	0.0376141	Conserved oligomeric Golgi complex, subunit 3 (AHRD V3.3 *-* A0A103Y6H1_CYNCS)
Solyc07g017770.3	SL3.0ch07	7985443	7985775	LastIntron	LastExon	UTR3	35.3149	28.3247	38.0667	13.284	12.25	11.7086	2.73091	0.0158361	Homogentisate phytyltransferase (AHRD V3.3 *** F1BPV8_SOLPN)
Solyc07g017860.3	SL3.0ch07	8200200	8200520	LastIntron	LastExon	UTR3	13.3615	11.1163	14.0649	7.49785	9.27964	7.21205	1.60665	0.0141628	Acetyl-coenzyme A synthetase (AHRD V3.3 *** M0ZY55_SOLTU)
Solyc07g022830.3	SL3.0ch07	22382771	22383036	Exon9	Intron9	Exon10	4.97464	3.29439	4.66774	2.46125	1.91234	1.95224	2.04507	0.0393052	EXS family protein (AHRD V3.3 *** B9MXW8_POPTR)
Solyc07g025520.3	SL3.0ch07	28767094	28767472	Intron6	UTR3	LastIntron	71.4055	49.8782	72.4653	14.1029	14.1142	14.647	4.52008	0.0206914	Methyltransferase, putative (AHRD V3.3 *** B9RK97_RICCO)
Solyc07g026960.3	SL3.0ch07	32800370	32801000	Exon15	LastExon	UTR3	10.1005	8.69922	11.177	6.75744	6.48497	6.27492	1.5359	0.0356813	Metallopeptidase M24 family protein (AHRD V3.3 *** AT4G29490.1)
Solyc07g032230.3	SL3.0ch07	36281423	36281685	LastExon	UTR3	UTR3	2.41043	2.26393	2.49566	1.29176	1.28797	1.09567	1.95081	0.000242992	Regulator of Vps4 activity in the MVB pathway protein (AHRD V3.3 *-* AT2G19710.1)
Solyc07g032380.3	SL3.0ch07	38301770	38302041	Intergenic	Intergenic	Intron1	4.47036	4.19829	4.04219	2.60293	3.13327	2.39855	1.56254	0.00764829	DNA LIGASE 6 (AHRD V3.3 --* AT1G66730.1)
Solyc07g032385.1	SL3.0ch07	38301770	38302041	LastExon	Intergenic	Intergenic	4.47036	4.19829	4.04219	2.60293	3.13327	2.39855	1.56254	0.00764829	Pentatricopeptide repeat-containing-like protein (AHRD V3.3 *** A0A0B0N0N5_GOSAR)
Solyc07g039200.3	SL3.0ch07	45720658	45720978	LastIntron	LastExon	UTR3	5.03383	3.96089	4.41447	1.86344	2.26048	1.99005	2.19321	0.00886748	WD-repeat protein, putative (AHRD V3.3 *** B9SP08_RICCO)
Solyc07g041080.3	SL3.0ch07	51911266	51911651	LastExon	LastExon	UTR3	6.01067	5.52186	6.35078	3.98941	4.53809	3.08424	1.54011	0.0208596	Transducin/WD40 repeat-like superfamily protein (AHRD V3.3 *** AT4G29830.1)
Solyc07g041200.3	SL3.0ch07	52102694	52103192	UTR3	UTR3	UTR3	8.85209	7.51702	8.62161	5.84775	5.44164	5.00721	1.53349	0.00720563	alpha/beta-Hydrolases superfamily protein (AHRD V3.3 *** AT5G20520.1)
Solyc07g042150.3	SL3.0ch07	55248829	55249211	Exon6	UTR3	UTR3	12.3847	11.2454	13.6318	7.66418	6.97379	6.83815	1.73504	0.00953759	ubiquinone biosynthesis COQ9-like protein (AHRD V3.3 *** AT1G19140.1)
Solyc07g042250.3	SL3.0ch07	55484343	55484644	LastExon	LastExon	UTR3	4.81295	3.79194	4.67578	1.91363	1.79818	1.73323	2.43904	0.0128815	chaperonin 21 precursor
Solyc07g042500.3	SL3.0ch07	55898189	55898728	LastExon	LastExon	UTR3	13.4744	10.8943	12.9557	8.25598	8.51255	7.57784	1.53306	0.0217755	Alpha/beta-Hydrolases superfamily protein, putative (AHRD V3.3 *** A0A061GM37_THECC)
Solyc07g042620.3	SL3.0ch07	56219813	56220413	LastIntron	Intergenic	Intergenic	12.9729	10.1503	13.4919	7.94187	7.9761	6.89546	1.60498	0.0361505	Prefoldin subunit 1 (AHRD V3.3 *** W9RLK5_9ROSA)
Solyc07g042630.3	SL3.0ch07	56219813	56220413	UTR3	Intergenic	Intergenic	12.9729	10.1503	13.4919	7.94187	7.9761	6.89546	1.60498	0.0361505	Terpene cyclase/mutase family member (AHRD V3.3 *** V9LYF2_9SOLA)
Solyc07g042980.3	SL3.0ch07	56644638	56645297	LastExon	LastExon	UTR3	7.904	7.61084	8.03826	4.87336	4.73099	4.04199	1.72596	0.0015983	Regulator of chromosome condensation (RCC1) family protein (AHRD V3.3 *** AT5G60870.3)
Solyc07g043260.3	SL3.0ch07	57047350	57047585	UTR3	UTR3	UTR3	3.69239	3.17455	3.25902	1.94552	1.70992	1.5056	1.962	0.0015724	Far1-related sequence 2-like protein (AHRD V3.3 *** A0A0B0NT15_GOSAR)
Solyc07g043510.3	SL3.0ch07	57500634	57501101	LastIntron	LastExon	UTR3	15.0539	11.4585	15.787	8.75943	9.36086	7.56964	1.64654	0.0395528	OTU domain-containing (AHRD V3.3 *** A0A0B0PSP5_GOSAR)
Solyc07g045145.1	SL3.0ch07	58376890	58377163	LastExon	LastExon	UTR3	5.65645	4.8673	6.12457	3.02723	2.94582	2.42138	1.98326	0.00690292	transmembrane protein (AHRD V3.3 *-* AT4G12680.1)
Solyc07g045330.3	SL3.0ch07	58563602	58563928	LastIntron	LastExon	Intergenic	11.891	9.95804	12.1814	7.17949	7.64653	6.02714	1.63191	0.00906991	GPCR-type G protein 2 (AHRD V3.3 *** AT4G27630.2)
Solyc07g047790.3	SL3.0ch07	59131644	59132082	LastExon	UTR3	UTR3	9.91052	7.7455	10.4544	6.00144	6.29266	5.0247	1.62311	0.032471	Heat shock protein, putative (AHRD V3.3 *** B9T0C8_RICCO)
Solyc07g047800.3	SL3.0ch07	59138667	59139039	LastExon	Intergenic	Intergenic	3.48587	3.08924	3.51188	1.89677	2.04833	1.6819	1.79261	0.00131148	NAD(P)-binding Rossmann-fold superfamily protein (AHRD V3.3 *** AT3G01980.4),Pfam:PF13561
Solyc07g047880.3	SL3.0ch07	59224163	59224552	LastIntron	UTR3	UTR3	6.35864	5.33431	6.4467	4.12202	3.67905	3.4151	1.61727	0.00945253	Sterile alpha motif (SAM) domain-containing protein (AHRD V3.3 *** AT3G07760.5)
Solyc07g049165.1	SL3.0ch07	59547086	59547444	LastExon	UTR3	Intergenic	9.91417	7.99341	10.1756	5.73638	5.20714	4.8356	1.77977	0.0170668	Ribonuclease 3 family protein (AHRD V3.3 *** B9GTV4_POPTR)
Solyc07g049490.2	SL3.0ch07	59897451	59897802	UTR3	UTR3	Intergenic	20.0821	14.3351	19.6182	10.4573	11.576	8.52825	1.76808	0.0337572	Ethylene Response Factor F.3
Solyc07g049500.3	SL3.0ch07	59897451	59897802	LastExon	Intergenic	Intergenic	20.0821	14.3351	19.6182	10.4573	11.576	8.52825	1.76808	0.0337572	Argonaute6
Solyc07g052453.1	SL3.0ch07	61098238	61098587	LastIntron	LastExon	Intergenic	12.4872	8.7914	14.443	5.03252	4.26216	4.19743	2.6476	0.0434131	Syntaxin, putative (AHRD V3.3 *** B9SUS4_RICCO)
Solyc07g052470.3	SL3.0ch07	61098238	61098587	LastIntron	LastExon	UTR3	12.4872	8.7914	14.443	5.03252	4.26216	4.19743	2.6476	0.0434131	Syntaxin, putative (AHRD V3.3 *** B9SUS4_RICCO)
Solyc07g052480.3	SL3.0ch07	61098238	61098587	UTR3	UTR3	UTR3	12.4872	8.7914	14.443	5.03252	4.26216	4.19743	2.6476	0.0434131	isocitrate lyase LEU18678
Solyc07g052700.3	SL3.0ch07	61290396	61290767	LastIntron	LastExon	UTR3	17.9786	14.2009	18.8321	9.96007	10.4455	8.7246	1.75116	0.0252815	AGAMOUS-like MADS-box transcription factor (AHRD V3.3 *** B2ZX81_CRYJA)
Solyc07g054160.3	SL3.0ch07	62649791	62650178	LastIntron	LastExon	UTR3	10.956	9.58458	10.9353	6.0592	6.84047	5.34128	1.72556	0.0021696	Tetraspanin family protein (AHRD V3.3 *** AT2G20740.1)
Solyc07g054210.3	SL3.0ch07	62692781	62693214	LastExon	UTR3	UTR3	10.3636	7.96464	9.85177	5.95558	6.27906	5.04096	1.6312	0.0216903	light dependent NADH:protochlorophyllide oxidoreductase 2
Solyc07g055145.1	SL3.0ch07	63409708	63410095	Intergenic	Exon1	Intron1	10.1759	8.0187	10.9085	6.17558	6.74244	5.48541	1.5814	0.0390277	folic acid binding / transferase (AHRD V3.3 --* AT2G20830.6)
Solyc07g055150.3	SL3.0ch07	63409708	63410095	LastIntron	UTR3	UTR3	10.1759	8.0187	10.9085	6.17558	6.74244	5.48541	1.5814	0.0390277	2-aminoethanethiol dioxygenase (AHRD V3.3 *** A0A151RTN6_CAJCA)
Solyc07g055160.3	SL3.0ch07	63409708	63410095	LastIntron	Intergenic	Intergenic	10.1759	8.0187	10.9085	6.17558	6.74244	5.48541	1.5814	0.0390277	alpha/beta-Hydrolases superfamily protein (AHRD V3.3 *** AT2G42690.1)
Solyc07g055230.3	SL3.0ch07	63466094	63466443	UTR3	UTR3	UTR3	3.77968	3.53526	4.18217	2.51686	2.5995	2.35919	1.53796	0.0112864	homeodomain GLABROUS 7 (AHRD V3.3 --* AT5G52170.3)
Solyc07g055260.3	SL3.0ch07	63479052	63479373	LastIntron	LastExon	UTR3	7.52414	6.33088	8.44354	3.19235	3.29344	2.8681	2.38388	0.016223	DnaJ (AHRD V3.3 *** A0A126DIH0_ARAHY)
Solyc07g062070.3	SL3.0ch07	65030439	65030791	UTR3	UTR3	UTR3	9.52732	8.01444	8.61067	5.52566	5.95534	4.72888	1.61336	0.00485375	Ribokinase (AHRD V3.3 *** M1AA65_SOLTU)
Solyc07g062540.3	SL3.0ch07	65369480	65369917	LastExon	LastExon	UTR3	8.60446	6.92324	8.75234	5.73153	5.27312	4.65606	1.55038	0.0220912	Mannosyltransferase (AHRD V3.3 *** K4CGT7_SOLLC)
Solyc07g062545.1	SL3.0ch07	65369480	65369917	UTR5	UTR5	UTR5	8.60446	6.92324	8.75234	5.73153	5.27312	4.65606	1.55038	0.0220912	Alpha-1,2-mannosyltransferase ALG9 (AHRD V3.3 --* A0A0A9MP14_ARUDO)
Solyc07g062650.3	SL3.0ch07	65471770	65472626	LastExon	Intergenic	Intergenic	5.21399	4.75806	5.4291	3.05255	3.4248	2.57829	1.70072	0.00298215	Malate dehydrogenase (AHRD V3.3 *** K4CGU8_SOLLC)
Solyc07g062660.3	SL3.0ch07	65471770	65472626	UTR3	Intergenic	Intergenic	5.21399	4.75806	5.4291	3.05255	3.4248	2.57829	1.70072	0.00298215	Transcription factor GTE4 (AHRD V3.3 *** A0A0B2R809_GLYSO)
Solyc07g062870.3	SL3.0ch07	65639853	65640160	LastExon	LastExon	UTR3	6.06726	4.97574	6.12905	3.21442	3.97261	3.24507	1.64608	0.0107707	30S ribosomal protein S20 (AHRD V3.3 *** A0A060IGE4_PANGI)
Solyc07g063110.3	SL3.0ch07	65818429	65818716	LastExon	LastExon	UTR3	3.7367	3.17913	3.83249	2.08101	2.76655	2.03562	1.56154	0.0151742	Core-2/I-branching beta-1,6-N-acetylglucosaminyltransferase family protein (AHRD V3.3 *** F4JIW2_ARATH)
Solyc07g063730.2	SL3.0ch07	66242448	66242696	LastExon	LastExon	UTR3	7.573	6.17315	7.65393	1.25414	0.435862	0.403563	10.2218	0.00100628	Serine/threonine-protein kinase (AHRD V3.3 *** M1CC72_SOLTU)
Solyc07g063900.3	SL3.0ch07	66377375	66377792	LastIntron	Intergenic	Intergenic	6.18053	5.86775	6.39301	4.44915	4.33577	3.46281	1.50569	0.0103735	RNA binding protein, putative (AHRD V3.3 *-* B9SY46_RICCO)
Solyc07g063960.3	SL3.0ch07	66425072	66425464	LastIntron	LastExon	UTR3	6.05514	4.6731	6.36905	3.14135	3.60808	2.93153	1.76607	0.0291703	50S ribosomal protein L24, chloroplastic (AHRD V3.3 *** RK24_TOBAC)
Solyc07g064160.3	SL3.0ch07	66553128	66553409	UTR3	UTR3	UTR3	2.57567	2.21928	2.46099	0.702947	0.707473	0.685884	3.4613	0.00360067	Thiamine thiazole synthase, chloroplastic (AHRD V3.3 *** K4CH99_SOLLC)
Solyc07g064490.3	SL3.0ch07	66748298	66748705	UTR3	UTR3	UTR3	6.80889	5.6823	6.84142	4.01967	4.20402	3.22333	1.68888	0.00654619	CRS2-associated factor 1 (AHRD V3.3 *** A0A072THI3_MEDTR)
Solyc07g064500.3	SL3.0ch07	66748298	66748705	LastExon	UTR3	UTR3	6.80889	5.6823	6.84142	4.01967	4.20402	3.22333	1.68888	0.00654619	Purple acid phosphatase (AHRD V3.3 *** K4CHD0_SOLLC)
Solyc07g064570.3	SL3.0ch07	66787746	66788139	LastIntron	LastExon	UTR3	20.1313	17.5705	22.2098	11.3269	11.6719	10.0424	1.81324	0.0132727	Rho GTPase-activating 32 (AHRD V3.3 *** A0A0B0PG63_GOSAR)
Solyc07g064630.3	SL3.0ch07	66823275	66823646	Intron4	Intron4	Intron4	8.37209	6.35343	8.54924	4.82236	5.09537	4.45221	1.61968	0.0441664	RNI-like superfamily protein (AHRD V3.3 *** AT4G26980.1)
Solyc07g064640.3	SL3.0ch07	66829878	66830270	UTR3	UTR3	Intergenic	14.6083	11.2711	14.5279	6.38872	8.04552	6.42377	1.93726	0.0138346	NADH dehydrogenase [ubiquinone] 1 alpha subcomplex subunit 12 (AHRD V3.3 *** M1C0L3_SOLTU)
Solyc07g064670.3	SL3.0ch07	66849779	66850148	LastExon	LastExon	UTR3	2.67003	2.67974	2.28794	1.66719	1.81857	1.47928	1.5383	0.00651275	Hexosyltransferase (AHRD V3.3 *** K4CHE6_SOLLC)
Solyc07g064675.1	SL3.0ch07	66849779	66850148	Intergenic	UTR5	LastIntron	2.67003	2.67974	2.28794	1.66719	1.81857	1.47928	1.5383	0.00651275	CTC-interacting domain 4 (AHRD V3.3 --* AT3G14010.5)
Solyc07g064840.2	SL3.0ch07	66967968	66968294	Exon2	LastExon	Intergenic	6.51047	5.47936	5.69571	3.43023	4.6225	2.87948	1.61775	0.0282521	Oral cancer-overexpressed protein 1 (AHRD V3.3 *** A0A0B2RBT1_GLYSO)
Solyc07g064850.3	SL3.0ch07	66968584	66968922	LastExon	UTR3	UTR3	10.8717	8.54733	11.6355	5.60907	6.38349	5.02389	1.82497	0.0237809	Adenylyltransferase and sulfurtransferase MOCS3 (AHRD V3.3 *** K4CHG4_SOLLC)
Solyc07g064920.3	SL3.0ch07	67022225	67022581	LastIntron	LastExon	UTR3	12.5713	10.6983	12.5713	6.49988	6.08657	4.95953	2.04269	0.00198651	Upstream activation factor subunit spp27 (AHRD V3.3 *** A0A0B2NVJ3_GLYSO)
Solyc07g065700.3	SL3.0ch07	67499055	67499415	LastExon	UTR3	UTR3	7.39132	6.42672	7.15696	4.25254	4.63917	3.49755	1.693	0.00318195	Sec14p-like phosphatidylinositol transfer family protein (AHRD V3.3 *** AT1G55840.1)
Solyc07g065790.2	SL3.0ch07	67548560	67548860	LastExon	LastExon	UTR3	3.51012	3.27134	3.71895	2.0488	2.0458	1.91602	1.74698	0.00382855	LOW QUALITY:transmembrane protein C9orf5 protein (AHRD V3.3 *** AT5G55960.1)
Solyc07g065800.3	SL3.0ch07	67548560	67548860	UTR3	UTR3	UTR3	3.51012	3.27134	3.71895	2.0488	2.0458	1.91602	1.74698	0.00382855	Protein CWC15 like (AHRD V3.3 *** A0A0B2SG97_GLYSO)
Solyc07g065890.3	SL3.0ch07	67622295	67622628	LastExon	LastExon	UTR3	11.5415	8.77667	12.254	5.75311	5.88933	5.05895	1.95027	0.0319628	Uridine kinase (AHRD V3.3 *** K4CHR5_SOLLC)
Solyc07g065980.3	SL3.0ch07	67678480	67678736	LastExon	Intergenic	Intergenic	1.90114	1.70531	2.00062	0.827845	0.999485	0.814178	2.12268	0.00125313	alkaline alpha-galactosidase seed imbibition protein
Solyc07g066310.3	SL3.0ch07	67917806	67918615	LastIntron	Intergenic	Intergenic	3.74991	3.31418	4.19525	2.15949	2.34727	2.0093	1.72794	0.0152807	Photosystem II 10 kDa polypeptide family protein (AHRD V3.3 *** A9PH94_POPTR)
Solyc07g066320.3	SL3.0ch07	67917806	67918615	UTR3	UTR3	Intergenic	3.74991	3.31418	4.19525	2.15949	2.34727	2.0093	1.72794	0.0152807	DNA repair protein recA (AHRD V3.3 *** U5GXJ6_POPTR)
Solyc07g066470.3	SL3.0ch07	68019739	68020125	LastExon	UTR3	UTR3	4.46168	3.98798	4.39224	2.60607	2.92254	2.27943	1.6447	0.00253318	Porphobilinogen deaminase, putative (AHRD V3.3 *** B9S2Z0_RICCO)
Solyc07g066530.3	SL3.0ch07	68060607	68060953	LastIntron	LastIntron	LastExon	6.03371	5.22109	4.62948	2.94392	3.82642	2.73998	1.67021	0.0168572	Tetratricopeptide repeat-containing family protein (AHRD V3.3 *** B9H631_POPTR)
Solyc08g005405.1	SL3.0ch08	304340	304665	LastExon	LastExon	UTR3	16.9175	14.8097	17.2718	9.89971	9.20873	8.16574	1.79654	0.0025275	Cytosine-specific methyltransferase (AHRD V3.3 *-* A0A061G618_THECC)
Solyc08g005470.3	SL3.0ch08	347897	348358	Exon16	LastIntron	Intergenic	3.7392	3.23264	3.81557	2.35438	2.44847	2.22748	1.53441	0.013054	MAP kinase (AHRD V3.3 *** I7ENF6_TOBAC)
Solyc08g005900.3	SL3.0ch08	686928	687308	LastExon	UTR3	UTR3	3.01716	3.31337	3.08995	2.28062	2.01552	1.87387	1.52682	0.00253429	Trihelix transcription factor GT-3a-like protein (AHRD V3.3 *** G7K6R0_MEDTR)
Solyc08g005990.3	SL3.0ch08	755391	755766	UTR3	UTR3	UTR3	5.88453	5.04297	5.48341	3.01596	3.30172	2.85325	1.78945	0.00287208	CDP-diacylglycerol--inositol 3-phosphatidyltransferase (AHRD V3.3 *-* M1B6Y1_SOLTU)
Solyc08g006120.3	SL3.0ch08	858603	858991	LastExon	UTR3	UTR3	10.4172	8.17097	9.54968	5.34196	4.63663	3.80876	2.04085	0.00563426	mitochondrial import inner membrane translocase subunit tim16-like
Solyc08g006720.3	SL3.0ch08	1275085	1275386	LastIntron	UTR3	Intergenic	10.7312	8.96007	11.4283	6.36056	5.70312	5.73796	1.74813	0.0196301	Glutathione peroxidase (AHRD V3.3 *** K4CIG0_SOLLC)
Solyc08g006820.3	SL3.0ch08	1356454	1356737	LastExon	UTR3	UTR3	3.45593	3.91015	3.61236	2.41683	2.31552	1.90431	1.65421	0.00236464	Transmembrane 9 superfamily member (AHRD V3.3 *** M1CHH8_SOLTU)
Solyc08g007370.3	SL3.0ch08	1943239	1943632	LastIntron	UTR3	UTR3	16.1177	12.3453	17.3418	9.5394	10.3838	8.12422	1.63312	0.0423809	RNA binding protein, putative (AHRD V3.3 *-* B9RNB1_RICCO)
Solyc08g007380.3	SL3.0ch08	1964099	1964427	LastExon	Intergenic	Intergenic	6.73152	5.38888	7.6835	4.03014	3.67299	2.81587	1.88268	0.0251417	Histidine triad nucleotide-binding 3 (AHRD V3.3 *** A0A0B0MT42_GOSAR)
Solyc08g007510.3	SL3.0ch08	2066674	2066903	UTR3	UTR3	UTR3	3.47489	2.91743	2.92635	2.12239	2.32257	1.70174	1.51605	0.0152117	Cornichon family protein (AHRD V3.3 *** AT1G12390.1)
Solyc08g007520.3	SL3.0ch08	2066674	2066903	LastExon	UTR3	UTR3	3.47489	2.91743	2.92635	2.12239	2.32257	1.70174	1.51605	0.0152117	Exosome complex component (AHRD V3.3 *** W9RYG2_9ROSA)
Solyc08g007950.3	SL3.0ch08	2457426	2457753	UTR3	UTR3	UTR3	6.78251	5.4499	7.26126	3.68002	3.9514	3.22557	1.7955	0.0220792	30S ribosomal S1 (AHRD V3.3 *** A0A0B0MP62_GOSAR)
Solyc08g008000.2	SL3.0ch08	2497628	2497934	Intron7	Intron7	Intron7	12.9294	10.2502	14.1364	7.70926	8.30702	6.87244	1.63032	0.0399618	Serine/threonine dehydratase (AHRD V3.3 *** A0A0K9PIX5_ZOSMR)
Solyc08g008040.3	SL3.0ch08	2537453	2537769	Exon7	Exon7	LastIntron	6.31762	4.82556	5.63265	3.03931	2.86255	3.21761	1.83956	0.0224634	rRNA-processing protein UTP23 like (AHRD V3.3 *** A0A0B2NPV2_GLYSO)
Solyc08g008330.3	SL3.0ch08	2761006	2761446	LastIntron	LastExon	Intergenic	19.7069	15.6542	20.5979	11.0915	10.5751	10.7265	1.7275	0.0343846	NAD(P)H-quinone oxidoreductase subunit K, chloroplastic (AHRD V3.3 --* A0A1C6ZUU3_9ASPA)
Solyc08g008340.3	SL3.0ch08	2761006	2761446	Intron2	Intron2	Intron2	19.7069	15.6542	20.5979	11.0915	10.5751	10.7265	1.7275	0.0343846	Nucleoside diphosphate kinase (AHRD V3.3 *** K4CIW8_SOLLC)
Solyc08g008370.3	SL3.0ch08	2790516	2790733	LastIntron	UTR3	UTR3	2.42654	2.33557	2.72166	1.48657	1.23186	1.0985	1.96068	0.00169203	DCD (Development and cell death) domain protein (AHRD V3.3 *** A0A072TUZ0_MEDTR)
Solyc08g014340.3	SL3.0ch08	4159337	4159791	LastIntron	UTR3	Intergenic	9.32467	7.72502	9.34743	5.43343	5.58979	4.68824	1.68012	0.00976281	Cysteine synthase (AHRD V3.3 *** K4CJ67_SOLLC)
Solyc08g015660.3	SL3.0ch08	5210004	5210221	LastIntron	LastExon	UTR3	25.1464	19.1777	28.649	11.8892	12.0821	12.4943	2.00115	0.0474055	6,7-dimethyl-8-ribityllumazine synthase (AHRD V3.3 *** K4CJ96_SOLLC)
Solyc08g015990.3	SL3.0ch08	6512988	6513405	LastIntron	UTR3	UTR3	11.8583	10.2574	12.3867	7.5224	7.70077	6.59885	1.58108	0.00959422	Golgi to ER traffic 4 (AHRD V3.3 *** A0A0B0NU26_GOSAR)
Solyc08g016010.3	SL3.0ch08	6571880	6572184	UTR3	UTR3	UTR3	4.70833	3.80845	4.83731	3.3838	2.9174	2.56415	1.50632	0.0236967	Apyrase-like protein (AHRD V3.3 *** A0MWC2_TOBAC)
Solyc08g016050.3	SL3.0ch08	6604804	6605096	LastExon	UTR3	UTR3	5.09583	4.53709	5.07057	2.87713	3.55217	2.93284	1.57052	0.00357878	Guanine nucleotide exchange factor SPIKE 1 (AHRD V3.3 *** SPK1_ARATH)
Solyc08g016420.3	SL3.0ch08	7542970	7543348	LastIntron	UTR3	UTR3	15.0209	12.3764	15.0901	8.83105	9.7413	7.7459	1.61437	0.0107105	Prefoldin subunit 6 (AHRD V3.3 *** A0A0B2Q9N0_GLYSO)
Solyc08g016670.3	SL3.0ch08	8455672	8456096	LastIntron	LastExon	UTR3	13.4323	9.77246	13.5299	7.17842	7.07294	6.18938	1.79713	0.0410599	Calcyclin-binding protein, putative (AHRD V3.3 *** B9S113_RICCO)
Solyc08g016750.3	SL3.0ch08	9120577	9120943	LastExon	UTR3	UTR3	5.70323	5.16661	5.63139	3.62076	3.38063	3.08509	1.63597	0.000751781	Pyruvate dehydrogenase E1 component subunit beta (AHRD V3.3 *** A0A0B0NLW1_GOSAR)
Solyc08g023570.2	SL3.0ch08	27260832	27261287	LastIntron	UTR3	UTR3	16.1978	13.432	17.5204	6.48131	7.11687	6.33072	2.36592	0.0143724	WD repeat-containing protein 48 (AHRD V3.3 *-* A0A1D1XI50_9ARAE)
Solyc08g041870.3	SL3.0ch08	25479702	25480090	LastIntron	LastExon	Intergenic	8.35344	6.5477	9.15177	5.61649	4.6592	4.94549	1.58023	0.0486377	Aspartate aminotransferase (AHRD V3.3 *** K4CK47_SOLLC)
Solyc08g042140.3	SL3.0ch08	23505470	23505862	LastExon	UTR3	UTR3	24.4534	18.8533	25.9565	11.2015	12.2377	12.0138	1.95367	0.032579	translation initiation factor 3 subunit I (AHRD V3.3 *** AT1G54680.4)
Solyc08g061130.3	SL3.0ch08	46816628	46817049	LastExon	UTR3	UTR3	7.17519	6.49183	7.73466	3.73904	4.34914	3.60199	1.83074	0.00302525	BZIP transcription factor (AHRD V3.3 *** L0MZN5_MALDO)
Solyc08g061265.1	SL3.0ch08	48409992	48410466	UTR3	UTR3	Intergenic	6.82712	5.33943	7.25866	3.8045	3.89204	3.45331	1.74219	0.0359729	G-protein coupled receptor 1 (AHRD V3.3 *-* A0A097PPA8_SOLLC)
Solyc08g061880.2	SL3.0ch08	49708104	49708382	Intron2	UTR3	Intron3	7.89363	5.68726	7.32062	1.96069	2.00742	2.1656	3.40764	0.0168715	Peroxisome biogenesis factor 10 (AHRD V3.3 *-* B9U2H6_TOBAC)
Solyc08g061880.2	SL3.0ch08	49703881	49704197	UTR3	UTR3	UTR3	8.20933	6.31254	7.63695	4.46219	3.6006	3.38643	1.9354	0.00982642	Peroxisome biogenesis factor 10 (AHRD V3.3 *-* B9U2H6_TOBAC)
Solyc08g063000.3	SL3.0ch08	52566106	52566676	LastIntron	Intergenic	Intergenic	14.9814	11.5614	16.953	7.98613	9.42362	6.95799	1.78497	0.0390474	Nucleosome assembly protein 1-like 1 (AHRD V3.3 *** A0A0B2RMX0_GLYSO)
Solyc08g063010.3	SL3.0ch08	52566106	52566676	LastExon	UTR3	UTR3	14.9814	11.5614	16.953	7.98613	9.42362	6.95799	1.78497	0.0390474	ADP,ATP carrier protein, putative (AHRD V3.3 *** B9RRQ6_RICCO)
Solyc08g065190.3	SL3.0ch08	53040237	53040561	LastExon	LastExon	UTR3	1.84059	2.06213	1.75053	1.04023	1.26442	0.867633	1.78208	0.00566693	zinc transporter (AHRD V3.3 *** AT1G10970.2)
Solyc08g065310.3	SL3.0ch08	53282268	53282804	Intron5	Exon7	LastIntron	7.05887	5.91015	7.23578	3.24289	3.5674	2.83666	2.09442	0.00499026	cell wall invertase 2 (AHRD V3.3 --* AT3G52600.3)
Solyc08g066000.2	SL3.0ch08	54509340	54509710	LastExon	UTR3	UTR3	11.4016	8.70646	10.78	6.94903	5.97048	6.49508	1.59097	0.0315384	Tetratricopeptide repeat-like superfamily protein isoform 1 (AHRD V3.3 *-* A0A061GK97_THECC)
Solyc08g066020.2	SL3.0ch08	54530579	54531128	UTR3	UTR3	UTR3	10.4222	8.51973	11.1219	6.19873	6.54864	5.87482	1.61441	0.0327668	Long chain base biosynthesis protein 1 (AHRD V3.3 *-* LCB1_ARATH)
Solyc08g066620.3	SL3.0ch08	55441020	55441320	UTR3	UTR3	Intergenic	8.03969	6.81875	9.04945	3.57429	5.44828	4.11634	1.81963	0.0141661	cystathionine beta-lyase (AHRD V3.3 *-* AT3G57050.5)
Solyc08g066700.3	SL3.0ch08	55592005	55592229	UTR3	UTR3	UTR3	1.6191	1.33055	1.59826	0.967315	1.10493	0.893935	1.53326	0.012757	Exosome complex exonuclease RRP46 homolog (AHRD V3.3 *** EXOS5_ARATH)
Solyc08g067960.3	SL3.0ch08	57086426	57086730	UTR3	UTR3	UTR3	3.41303	3.05702	3.43106	1.72067	2.05645	1.67401	1.81634	0.000978947	RING finger and CHY zinc finger protein (AHRD V3.3 *** G7JNA1_MEDTR)
Solyc08g068100.3	SL3.0ch08	57237295	57237652	LastExon	UTR3	Intergenic	5.56019	5.03217	6.21237	3.82863	3.71561	3.06469	1.58402	0.0102535	bZIP transcription factor (DUF630 and DUF632) (AHRD V3.3 *** AT2G27090.2)
Solyc08g069120.3	SL3.0ch08	58253019	58253291	UTR3	UTR3	UTR3	3.7136	3.50732	3.91478	1.7466	1.77996	1.58467	2.17867	0.000638219	Arginine/serine-rich splicing factor, putative (AHRD V3.3 *** B9RNP5_RICCO)
Solyc08g075650.3	SL3.0ch08	59911753	59912170	LastExon	UTR3	UTR3	8.01878	6.02729	8.17786	4.87044	4.79871	4.24916	1.59674	0.0481819	Formin-like protein (AHRD V3.3 *** K4CMT2_SOLLC)
Solyc08g075850.3	SL3.0ch08	60048514	60048949	LastIntron	UTR3	UTR3	21.566	17.0436	22.4895	14.1665	14.0838	12.0867	1.51472	0.0396605	50S ribosomal protein L24 (AHRD V3.3 *** W9QWA0_9ROSA)
Solyc08g075890.3	SL3.0ch08	60103636	60103938	LastExon	LastExon	UTR3	2.43775	2.44945	2.45181	1.50057	1.68726	1.53799	1.55296	0.00408165	MAP kinase (AHRD V3.3 *** I7ENF6_TOBAC)
Solyc08g075960.3	SL3.0ch08	60166489	60166948	LastIntron	LastExon	Intergenic	11.5344	9.88795	12.3814	7.64917	7.47678	6.82715	1.53982	0.0231396	MOB kinase activator-like 1A (AHRD V3.3 *** MOB1A_ARATH)
Solyc08g076410.3	SL3.0ch08	60548616	60548924	Exon7	Exon7	UTR3	10.1441	6.97153	8.06364	4.37556	5.89867	4.43921	1.71131	0.0442927	Shikimate kinase (AHRD V3.3 *** A0A151RA83_CAJCA)
Solyc08g076420.3	SL3.0ch08	60548616	60548924	UTR3	UTR3	UTR3	10.1441	6.97153	8.06364	4.37556	5.89867	4.43921	1.71131	0.0442927	Poly [ADP-ribose] polymerase (AHRD V3.3 *** A0A0V0IXP4_SOLCH)
Solyc08g076440.3	SL3.0ch08	60572412	60572706	LastExon	Intergenic	Intergenic	5.06625	4.30131	5.64796	3.1036	3.18621	2.39072	1.72979	0.0148895	Programmed cell death protein 2 (AHRD V3.3 *** A0A0B0NZT2_GOSAR)
Solyc08g077170.3	SL3.0ch08	61208700	61209033	UTR3	UTR3	Intergenic	8.57899	6.97812	8.92374	5.50189	5.19004	4.5857	1.6024	0.0220204	Peptide transporter, putative (AHRD V3.3 *** B9S1I2_RICCO)
Solyc08g077180.3	SL3.0ch08	61208700	61209033	LastIntron	UTR3	UTR3	8.57899	6.97812	8.92374	5.50189	5.19004	4.5857	1.6024	0.0220204	Pyruvate kinase (AHRD V3.3 *** K4CN78_SOLLC)
Solyc08g077300.3	SL3.0ch08	61322293	61322747	LastIntron	UTR3	UTR3	10.6862	8.54671	11.4543	6.59214	6.83561	5.27763	1.64056	0.0256664	UMP-CMP kinase (AHRD V3.3 *** K4CN90_SOLLC)
Solyc08g077910.3	SL3.0ch08	61935965	61936476	UTR3	UTR3	UTR3	8.89986	8.16915	9.34157	5.62983	6.15736	4.75877	1.5962	0.00384434	Expansin-like protein (AHRD V3.3 *** W9S0F1_9ROSA)
Solyc08g077920.3	SL3.0ch08	61935965	61936476	LastExon	UTR3	UTR3	8.89986	8.16915	9.34157	5.62983	6.15736	4.75877	1.5962	0.00384434	Isocitrate dehydrogenase [NAD] subunit, mitochondrial (AHRD V3.3 *** K4CNF1_SOLLC)
Solyc08g077970.2	SL3.0ch08	61984942	61985446	LastExon	UTR3	Intergenic	4.89516	5.083	4.88217	2.9388	3.29824	2.80085	1.64423	0.00190312	transcription factor IIIB (AHRD V3.3 *** AT4G17010.1)
Solyc08g077980.3	SL3.0ch08	61988354	61988671	LastExon	UTR3	Intergenic	3.66083	3.51961	3.88654	2.1204	2.08135	2.04694	1.77109	0.003324	Bax inhibitor
Solyc08g078010.3	SL3.0ch08	62006675	62007041	LastExon	UTR3	UTR3	5.35598	5.15928	6.03072	3.34231	4.19973	2.92832	1.58027	0.0145873	Ribosomal protein L19 family protein (AHRD V3.3 *** AT4G17560.1)
Solyc08g078690.3	SL3.0ch08	62589828	62590099	LastExon	Intergenic	Intergenic	10.8473	7.83088	10.3909	5.76901	5.98005	5.18175	1.71694	0.0426478	putative vesicle-associated protein
Solyc08g078750.3	SL3.0ch08	62604304	62604551	Intron5	Exon7	Intron8	11.8204	8.70098	10.4844	5.89294	6.99481	5.49917	1.68629	0.0263357	Leukocyte receptor cluster member 1 (AHRD V3.3 *** A0A0B0N472_GOSAR)
Solyc08g079235.1	SL3.0ch08	62971334	62971664	LastExon	Intergenic	Intergenic	8.53088	7.23504	9.08855	4.74954	4.93508	3.97575	1.81946	0.00880571	Plant invertase/pectin methylesterase inhibitor (AHRD V3.3 *** G7KG88_MEDTR)
Solyc08g079710.3	SL3.0ch08	63318850	63319127	LastExon	LastExon	UTR3	43.6979	30.5579	50.5819	10.7298	10.267	12.4656	3.73068	0.0337989	Kinesin-like protein (AHRD V3.3 *** K4CNX1_SOLLC)
Solyc08g079720.3	SL3.0ch08	63318850	63319127	UTR3	UTR3	Intron3	43.6979	30.5579	50.5819	10.7298	10.267	12.4656	3.73068	0.0337989	AT hook motif DNA-binding family protein (AHRD V3.3 *** A0A072TPA5_MEDTR)
Solyc08g079725.1	SL3.0ch08	63318850	63319127	Intergenic	Intergenic	Intron1	43.6979	30.5579	50.5819	10.7298	10.267	12.4656	3.73068	0.0337989	elongation factor G, putative (DUF668) (AHRD V3.3 --* AT1G30755.6)
Solyc08g079820.3	SL3.0ch08	63395778	63396559	Exon7	Exon7	UTR3	5.56311	4.98661	5.88849	3.21438	3.53643	2.59648	1.75861	0.00347573	Nudix hydrolase (AHRD V3.3 *** A0A061G560_THECC)
Solyc08g079830.3	SL3.0ch08	63395778	63396559	LastExon	UTR3	UTR3	5.56311	4.98661	5.88849	3.21438	3.53643	2.59648	1.75861	0.00347573	copper/zinc superoxide dismutase copper chaperone precursor
Solyc08g081180.3	SL3.0ch08	64377629	64378026	LastIntron	LastExon	UTR3	10.6209	8.69467	10.9783	5.9393	5.28694	5.01099	1.86571	0.0130594	Signal peptide peptidase-like protein (AHRD V3.3 *** A0A072UBU3_MEDTR)
Solyc08g081310.3	SL3.0ch08	64496122	64496405	LastExon	UTR3	UTR3	6.88064	6.6329	7.12635	3.08505	3.88779	2.60266	2.15549	0.00495649	histone deacetylase complex subunit (AHRD V3.3 *** AT1G19330.2)
Solyc08g081453.1	SL3.0ch08	64633693	64634033	LastExon	LastExon	UTR3	4.02633	3.75262	4.25998	2.11406	2.448	1.71843	1.91688	0.00266182	Nuclear transport factor 2 (NTF2) family protein (AHRD V3.3 *** AT5G41470.1)
Solyc08g081457.1	SL3.0ch08	64633693	64634033	LastExon	UTR3	UTR3	4.02633	3.75262	4.25998	2.11406	2.448	1.71843	1.91688	0.00266182	IQ-domain 28 (AHRD V3.3 --* AT1G14380.7)
Solyc08g081580.3	SL3.0ch08	64716891	64717280	UTR3	UTR3	UTR3	4.52385	3.42339	4.71548	2.80043	2.84363	2.4059	1.57302	0.0498323	D111/G-patch domain-containing protein (AHRD V3.3 *** AT1G63980.2)
Solyc08g082240.1	SL3.0ch08	65200556	65200985	LastExon	Intergenic	Intergenic	3.9089	4.42389	3.85628	2.50527	2.79391	2.46203	1.57051	0.00473308	transmembrane protein (AHRD V3.3 *-* AT1G64385.2)
Solyc08g082540.3	SL3.0ch08	65418745	65419075	LastIntron	LastExon	UTR3	9.97248	8.17245	9.86523	5.73753	6.51897	4.84861	1.63753	0.00939354	Galactose-binding protein (AHRD V3.3 *** AT4G23950.1)
Solyc08g082560.3	SL3.0ch08	65432890	65433237	LastExon	Intergenic	Intergenic	9.57173	7.35217	9.7735	4.93511	4.83128	4.16666	1.91612	0.0235265	F-box SKIP8-like protein (AHRD V3.3 *** A0A0B0PWH2_GOSAR)
Solyc08g082730.3	SL3.0ch08	65550561	65550938	LastExon	LastExon	UTR3	5.90741	5.20013	5.79523	3.46292	3.79729	3.05125	1.63922	0.00203838	BZIP transcription factor (AHRD V3.3 *** G7J8W4_MEDTR)
Solyc08g083040.3	SL3.0ch08	65745408	65746082	LastIntron	Intergenic	Intergenic	4.12576	3.9702	4.49608	2.44917	2.67948	2.38664	1.67552	0.00199239	Kinase family protein (AHRD V3.3 *** D7M8X8_ARALL)
Solyc08g083120.3	SL3.0ch08	65796947	65797342	Exon4	LastExon	UTR3	5.82751	5.00366	6.88847	3.86359	3.99968	3.42859	1.56924	0.0484372	ubiquitin-ribosomal fusion protein
Solyc08g083130.3	SL3.0ch08	65796947	65797342	LastIntron	LastIntron	LastIntron	5.82751	5.00366	6.88847	3.86359	3.99968	3.42859	1.56924	0.0484372	Homeobox-leucine zipper protein (AHRD V3.3 *** K4MNF8_MEDSA)
Solyc08g083140.3	SL3.0ch08	65809333	65809831	LastExon	LastExon	Intergenic	8.17097	7.78645	9.06143	4.56666	5.13487	3.69741	1.86723	0.0024324	Embryogenesis-associated EMB8 (AHRD V3.3 *** A0A0B0P518_GOSAR)
Solyc08g083320.3	SL3.0ch08	65936537	65936847	LastExon	Intergenic	Intergenic	5.57983	5.11489	5.89503	2.42709	2.98001	1.98088	2.2455	0.00142426	granule-bound starch synthase 1
Solyc09g005230.3	SL3.0ch09	174954	175312	UTR3	UTR3	UTR3	9.73075	8.12682	10.5204	5.06215	6.49831	4.98951	1.71468	0.013115	UPF0420 C16orf58-like protein (AHRD V3.3 *** G7KS93_MEDTR)
Solyc09g005250.3	SL3.0ch09	183217	183522	LastExon	UTR3	UTR3	7.57962	5.58844	6.94192	4.48946	4.61761	3.70225	1.56995	0.0356644	Mitochondrial substrate carrier family protein (AHRD V3.3 *** AT3G51870.1)
Solyc09g005990.3	SL3.0ch09	679062	679332	LastExon	Intergenic	Intergenic	5.93689	4.85669	5.82903	3.81775	3.5574	3.51635	1.5262	0.024203	Pentatricopeptide repeat-containing protein, putative (AHRD V3.3 *** B9SGU4_RICCO)
Solyc09g006000.3	SL3.0ch09	679062	679332	UTR3	UTR3	UTR3	5.93689	4.85669	5.82903	3.81775	3.5574	3.51635	1.5262	0.024203	zinc/iron-chelating domain protein (AHRD V3.3 *** AT5G02710.3)
Solyc09g007070.1	SL3.0ch09	717674	718022	LastExon	Intergenic	Intergenic	5.09447	4.53758	5.39607	3.59378	3.08766	2.80798	1.58367	0.00575271	Succinate dehydrogenase assembly factor 1, mitochondrial (AHRD V3.3 *** A0A0B0PRI9_GOSAR)
Solyc09g007270.3	SL3.0ch09	868948	869240	LastIntron	LastExon	UTR3	5.11406	4.9514	5.74118	2.95068	3.23465	2.52137	1.81546	0.00189038	Ascorbate peroxidase (AHRD V3.3 *** B9VRH6_CITMA)
Solyc09g007570.2	SL3.0ch09	1164509	1164777	LastExon	Intergenic	Intergenic	13.0265	9.70066	13.5032	8.38705	7.51862	6.09128	1.64706	0.0377954	Myb family transcription factor family protein (AHRD V3.3 *** B9H5N1_POPTR)
Solyc09g008600.3	SL3.0ch09	2076848	2077430	LastIntron	Intergenic	Intergenic	5.40927	5.2307	5.79014	2.96784	3.48392	2.64942	1.80527	0.00195635	Eukaryotic aspartyl protease family protein (AHRD V3.3 *** AT5G22850.1)
Solyc09g008610.3	SL3.0ch09	2076848	2077430	UTR3	UTR3	UTR3	5.40927	5.2307	5.79014	2.96784	3.48392	2.64942	1.80527	0.00195635	ER membrane protein complex subunit 1 (AHRD V3.3 *** A0A199VQY4_ANACO)
Solyc09g009090.3	SL3.0ch09	2441947	2442206	Intron15	Exon16	LastIntron	3.63566	3.29203	3.53713	1.72255	1.96926	1.641	1.96235	0.00027438	CTR1-like protein kinase-3
Solyc09g009290.3	SL3.0ch09	2673108	2673868	LastExon	LastExon	UTR3	11.043	9.22457	10.8723	6.51562	6.95819	5.80802	1.61499	0.00806901	Ankyrin repeat family protein (AHRD V3.3 *** AT5G40160.1)
Solyc09g009300.3	SL3.0ch09	2673108	2673868	LastExon	UTR3	Intergenic	11.043	9.22457	10.8723	6.51562	6.95819	5.80802	1.61499	0.00806901	Protein BUD31 like 2 (AHRD V3.3 *** A0A0B2PXU2_GLYSO)
Solyc09g009430.3	SL3.0ch09	2862230	2862860	LastExon	UTR3	UTR3	16.531	11.7564	16.6036	7.23853	7.2961	6.48923	2.13524	0.0354088	Cell division protein ftsZ, putative (AHRD V3.3 *** B9SRX2_RICCO)
Solyc09g009710.3	SL3.0ch09	3122339	3122588	LastExon	LastExon	Intergenic	13.2717	11.0729	13.0455	7.85199	7.95922	7.84316	1.58069	0.0222203	Transducin/WD40 repeat-like superfamily protein (AHRD V3.3 *** AT1G19485.2)
Solyc09g009940.3	SL3.0ch09	3401954	3402313	Intron14	UTR3	UTR3	8.69496	7.52437	8.70915	4.78355	4.95169	4.28042	1.77862	0.00380143	Signal recognition particle 54 kDa protein (AHRD V3.3 *** W9R2A9_9ROSA)
Solyc09g010170.3	SL3.0ch09	3548816	3549175	LastExon	UTR3	UTR3	6.39412	5.25879	6.52448	4.13497	4.20351	3.69617	1.51042	0.0242263	Vacuolar protein sorting-associated protein 55 like (AHRD V3.3 *** A0A0B2QGA7_GLYSO)
Solyc09g010260.3	SL3.0ch09	3646818	3647996	Exon2	Exon3	LastIntron	6.20813	6.03275	6.11963	3.2728	3.51192	2.95343	1.88542	0.00151725	Trichome birefringence-like 8, putative (AHRD V3.3 *** A0A061EUN4_THECC)
Solyc09g010270.1	SL3.0ch09	3646818	3647996	Intergenic	UTR5	Intergenic	6.20813	6.03275	6.11963	3.2728	3.51192	2.95343	1.88542	0.00151725	Trichome birefringence (AHRD V3.3 *-* A0A0K9NN56_ZOSMR)
Solyc09g010280.3	SL3.0ch09	3646818	3647996	Intron17	UTR3	UTR3	6.20813	6.03275	6.11963	3.2728	3.51192	2.95343	1.88542	0.00151725	LETM1-like protein (AHRD V3.3 *** AT3G11560.4)
Solyc09g010350.3	SL3.0ch09	3743148	3743471	LastIntron	UTR3	Intergenic	17.2588	12.6071	16.8333	9.86131	10.4786	7.1812	1.69685	0.0290917	DNA-binding protein, putative (AHRD V3.3 *** A0A072VL98_MEDTR)
Solyc09g010360.3	SL3.0ch09	3743148	3743471	UTR5	UTR5	UTR5	17.2588	12.6071	16.8333	9.86131	10.4786	7.1812	1.69685	0.0290917	WAT1-related protein (AHRD V3.3 *** K4CR63_SOLLC)
Solyc09g010440.3	SL3.0ch09	3812706	3813053	LastExon	LastExon	UTR3	2.45344	2.4171	2.42483	1.36461	1.42443	1.26633	1.79894	0.00109755	Actin depolymerizing factor, putative (AHRD V3.3 *** B9T4D2_RICCO)
Solyc09g010540.3	SL3.0ch09	3911100	3911375	LastIntron	UTR3	UTR3	24.2445	18.8733	29.5081	7.69203	6.71228	6.16107	3.53147	0.027771	dentin sialophosphoprotein-like protein (AHRD V3.3 *-* AT5G02520.2)
Solyc09g010917.1	SL3.0ch09	4257237	4257645	Exon2	Intron2	Intron2	9.4995	9.00698	10.3706	5.10015	5.99553	4.76204	1.82101	0.00136045	F-box family protein (AHRD V3.3 --* A0A061G9M7_THECC)
Solyc09g010930.3	SL3.0ch09	4264135	4264644	LastExon	UTR3	UTR3	8.83953	8.6846	8.38226	4.45621	4.86212	4.00254	1.9448	0.000574822	NAD(P)-binding rossmann-fold protein (AHRD V3.3 *** I3TAJ6_MEDTR)
Solyc09g011420.3	SL3.0ch09	4754172	4754514	LastIntron	LastExon	UTR3	4.60268	4.37445	4.60543	3.07834	2.69112	2.81577	1.58209	0.000557725	Ribosomal protein l7ae (AHRD V3.3 *** A0A0A0LF58_CUCSA)
Solyc09g015190.2	SL3.0ch09	8166986	8167310	Intergenic	Intergenic	Intron1	10.2463	8.96519	9.71604	5.893	5.20005	5.00636	1.79681	0.00113527	Dehydration responsive element binding transcription factor (AHRD V3.3 *-* W6FJ00_9ROSA)
Solyc09g015650.3	SL3.0ch09	10585409	10585657	Exon6	Intron6	Intron6	3.18294	2.90405	2.93684	1.12408	0.99764	0.964068	2.92432	0.000223645	Non-green plastid inner envelope membrane protein (AHRD V3.3 *** G7KY60_MEDTR)
Solyc09g015660.3	SL3.0ch09	10667806	10668146	LastExon	LastExon	UTR3	7.3916	5.81346	7.60868	3.85439	3.96634	3.52715	1.83415	0.02564	Transcription factor GTE1 (AHRD V3.3 *** A0A0B2PDN7_GLYSO)
Solyc09g018160.3	SL3.0ch09	13389299	13389657	LastExon	LastExon	UTR3	12.1598	10.0198	13.4738	6.91382	5.80032	5.51536	1.95581	0.0169834	Nucleotidyltransferase domain containing protein, expressed (AHRD V3.3 *** A0A0K9PDV3_ZOSMR)
Solyc09g031580.3	SL3.0ch09	29866721	29867068	LastIntron	UTR3	UTR3	12.1909	10.3814	11.5083	7.93959	7.20717	6.63497	1.56464	0.00445134	RING/FYVE/PHD zinc finger protein (AHRD V3.3 *-* G7K198_MEDTR)
Solyc09g042770.3	SL3.0ch09	25803127	25803446	UTR3	UTR3	Intergenic	5.59171	4.76823	6.38882	3.26076	3.08425	3.3169	1.73348	0.0345816	Rhodanese-like (AHRD V3.3 *** A2Q5X2_MEDTR)
Solyc09g055260.3	SL3.0ch09	38591737	38592127	Exon16	UTR3	LastIntron	4.26005	3.89114	4.00969	2.03186	2.55999	2.04009	1.83368	0.00188057	E3 ubiquitin-protein ligase listerin-like protein (AHRD V3.3 *** A0A072UEK1_MEDTR)
Solyc09g055910.3	SL3.0ch09	46302117	46302685	LastIntron	UTR3	UTR3	16.1805	12.9626	16.1604	8.76348	8.10381	7.97785	1.82343	0.0194838	FAD-dependent oxidoreductase family protein (AHRD V3.3 *** AT5G48440.1)
Solyc09g055930.3	SL3.0ch09	46422979	46423272	LastExon	UTR3	UTR3	8.20672	5.2886	7.20111	3.51704	3.93223	2.95655	1.98893	0.0456546	Monocopper oxidase-like protein SKU5 (AHRD V3.3 *** A0A151SII9_CAJCA)
Solyc09g056160.3	SL3.0ch09	47408772	47409164	UTR3	UTR3	UTR3	6.02559	4.79101	6.36759	3.75553	3.78285	3.2501	1.59283	0.03483	Chaperone surA (AHRD V3.3 *** A0A1D1YVG1_9ARAE)
Solyc09g056260.3	SL3.0ch09	48298434	48298758	UTR3	UTR3	UTR3	14.3969	11.1722	15.6445	6.22744	8.65713	5.92821	1.9802	0.0177835	tRNA pseudouridine synthase (AHRD V3.3 *** K4CTC1_SOLLC)
Solyc09g059310.3	SL3.0ch09	54451995	54452563	LastExon	LastExon	UTR3	5.50965	4.92765	5.5134	3.29981	3.20386	2.95286	1.68674	0.00210317	Nuclear transport factor 2 family protein with RNA binding domain, putative isoform 2 (AHRD V3.3 *** A0A061DMC0_THECC)
Solyc09g059650.3	SL3.0ch09	55242853	55243218	LastExon	UTR3	UTR3	25.5628	16.7542	21.3031	6.38134	6.95329	5.58341	3.36294	0.0255769	Vacuolar iron transporter family protein (AHRD V3.3 --* A0A061DZC1_THECC)
Solyc09g059950.3	SL3.0ch09	57178989	57179411	UTR3	UTR3	UTR3	7.8584	7.11207	8.37452	5.50256	5.28225	4.50175	1.52716	0.00536835	Amino acid--[acyl-carrier-protein] ligase (AHRD V3.3 *** A0A0B0MIR3_GOSAR)
Solyc09g059960.3	SL3.0ch09	57178989	57179411	LastExon	UTR3	UTR3	7.8584	7.11207	8.37452	5.50256	5.28225	4.50175	1.52716	0.00536835	GPI transamidase component Gpi16 subunit family protein (AHRD V3.3 *** AT3G07140.1)
Solyc09g059970.3	SL3.0ch09	57197274	57197590	LastIntron	LastExon	UTR3	8.87105	6.86611	9.53283	5.24927	4.65743	3.80057	1.84355	0.0233981	Small ubiquitin-related modifier (AHRD V3.3 *** Q9SMD1_SOLLC)
Solyc09g060080.3	SL3.0ch09	57755536	57755903	Intron1	Intron1	Intron1	9.67865	8.43763	9.32472	5.90806	6.2071	5.71795	1.53877	0.00667614	Helicase/SANT-associated, DNA binding protein (AHRD V3.3 *** AT3G24880.3)
Solyc09g061290.3	SL3.0ch09	58837961	58838419	LastIntron	UTR3	Intergenic	14.0545	10.2971	14.4034	7.83071	7.41816	6.49343	1.78247	0.0403349	Transcriptional corepressor LEUNIG (AHRD V3.3 *** W9S398_9ROSA)
Solyc09g061710.3	SL3.0ch09	60432743	60433083	LastIntron	UTR3	UTR3	5.56509	5.2521	5.12375	3.15597	3.53564	3.11036	1.6263	0.000406272	Alba DNA/RNA-binding protein (AHRD V3.3 *-* AT3G07030.5)
Solyc09g063030.3	SL3.0ch09	61212387	61212695	LastExon	UTR3	UTR3	4.57163	3.91878	4.94753	2.82655	3.40765	2.42597	1.55169	0.0184739	CLIP-associating family protein (AHRD V3.3 *** B9GR98_POPTR)
Solyc09g064320.3	SL3.0ch09	61724723	61725050	LastExon	LastExon	UTR3	14.4924	11.0293	15.091	7.68161	7.67118	6.53773	1.85527	0.0302799	Transducin/WD40 repeat protein (AHRD V3.3 *** A0A072VM11_MEDTR)
Solyc09g064330.2	SL3.0ch09	61724723	61725050	UTR3	UTR3	UTR3	14.4924	11.0293	15.091	7.68161	7.67118	6.53773	1.85527	0.0302799	RmlC-like cupins superfamily protein (AHRD V3.3 *** A0A061DW96_THECC)
Solyc09g064590.3	SL3.0ch09	62152335	62152876	LastIntron	LastExon	UTR3	13.4847	11.0147	13.9445	8.61229	8.50136	7.38482	1.56924	0.0227274	Pre-mRNA-processing factor 39 (AHRD V3.3 *** A0A0B2P4C7_GLYSO)
Solyc09g064860.3	SL3.0ch09	62573064	62573425	LastExon	UTR3	UTR3	5.32641	4.55974	5.48466	3.06341	3.43749	2.67626	1.6749	0.00556713	ELKS/Rab6-interacting/CAST family protein (AHRD V3.3 *-* AT4G02880.2)
Solyc09g065150.1	SL3.0ch09	63296418	63296768	Intergenic	UTR5	Intergenic	10.2197	8.11662	11.0669	6.78845	6.74185	5.74245	1.52564	0.0468533	LOW QUALITY:Legume lectin family protein (AHRD V3.3 --* AT1G53070.1)
Solyc09g065160.3	SL3.0ch09	63296418	63296768	LastExon	UTR3	UTR3	10.2197	8.11662	11.0669	6.78845	6.74185	5.74245	1.52564	0.0468533	FZO-like protein (AHRD V3.3 *-* G7IED3_MEDTR)
Solyc09g065270.3	SL3.0ch09	63578416	63578799	LastIntron	Intergenic	Intergenic	13.6367	12.2624	14.4794	8.37585	8.7328	7.54323	1.63795	0.00514218	Ribosome recycling factor family protein (AHRD V3.3 *** B9GSN2_POPTR)
Solyc09g065340.3	SL3.0ch09	63658345	63658763	LastIntron	UTR3	UTR3	26.4204	20.3224	24.0891	15.0696	16.2099	12.7411	1.60907	0.0195984	Acyl-CoA N-acyltransferase with RING/FYVE/PHD-type zinc finger protein (AHRD V3.3 *-* AT5G36740.5)
Solyc09g065610.2	SL3.0ch09	63994261	63994518	LastExon	UTR3	UTR3	2.72128	2.58439	2.50756	1.55006	1.47287	1.71742	1.64824	0.000475774	Bax inhibitor (AHRD V3.3 *-* A0A0K1ETI6_TECGR)
Solyc09g066430.3	SL3.0ch09	65084751	65085139	LastIntron	LastExon	UTR3	5.0527	4.33072	5.28445	3.0837	3.51702	2.58696	1.59647	0.00980188	60S ribosomal protein L14, putative (AHRD V3.3 *** B9SV21_RICCO)
Solyc09g073000.3	SL3.0ch09	66084332	66084806	LastExon	UTR3	UTR3	9.69128	7.78934	9.70272	5.68987	5.60963	4.65329	1.70399	0.0134814	Elongation factor Tu (AHRD V3.3 *** K4CUX6_SOLLC)
Solyc09g074650.3	SL3.0ch09	66898396	66898720	LastExon	LastExon	UTR3	7.91334	5.6683	7.05642	4.03988	4.78483	3.85706	1.62738	0.0397116	Peptide chain release factor 1 (AHRD V3.3 *** AT3G62910.1)
Solyc09g075150.3	SL3.0ch09	67374784	67375130	LastExon	LastExon	UTR3	4.13004	3.56667	4.56205	2.5913	2.74913	2.29567	1.60537	0.0193097	60S ribosomal protein L22-2 (AHRD V3.3 *** RL222_ARATH)
Solyc09g075160.3	SL3.0ch09	67378773	67379095	LastExon	LastExon	UTR3	3.27865	3.02233	3.43689	2.1406	2.05328	1.95947	1.58253	0.00410167	60S ribosomal protein L22-2 (AHRD V3.3 *** RL222_ARATH)
Solyc09g075430.3	SL3.0ch09	67559704	67560165	UTR3	UTR3	UTR3	6.50431	5.50084	6.78425	2.18845	2.2125	1.88818	2.9876	0.00576392	Ribosomal protein L19 (AHRD V3.3 *** K4CVC0_SOLLC)
Solyc09g075440.3	SL3.0ch09	67559704	67560165	LastExon	UTR3	UTR3	6.50431	5.50084	6.78425	2.18845	2.2125	1.88818	2.9876	0.00576392	Never ripe-2
Solyc09g075510.3	SL3.0ch09	67646336	67646706	UTR3	UTR3	UTR3	12.3412	9.30621	12.7113	7.23481	7.28162	6.52259	1.63309	0.0481499	Dehydration-induced 19-like protein (AHRD V3.3 *** E3T7S4_GOSHI)
Solyc09g075730.3	SL3.0ch09	67779196	67779453	UTR3	UTR3	UTR3	9.10528	7.20652	8.50179	5.28185	4.42568	5.9836	1.58138	0.0146984	Leucine-rich repeat family protein / protein kinase family protein (AHRD V3.3 *** A0A0K9PIB6_ZOSMR)
Solyc09g076040.3	SL3.0ch09	68152297	68152763	LastExon	LastExon	UTR3	7.65508	6.74033	7.64009	4.28517	4.8746	3.59849	1.72715	0.00331757	Protein SUPPRESSOR OF GENE SILENCING 3 (AHRD V3.3 *** A0A1D1YP94_9ARAE)
Solyc09g082490.3	SL3.0ch09	68625693	68625966	UTR3	UTR3	UTR3	8.6911	6.83015	9.01913	3.90038	5.04728	4.00738	1.89427	0.0146997	Protein XRI1-like protein (AHRD V3.3 *** A0A0B0NEL0_GOSAR)
Solyc09g083010.3	SL3.0ch09	69125919	69126175	LastExon	UTR3	Intergenic	8.90791	9.23457	9.59672	3.22493	3.13821	3.07861	2.93793	0.000676768	Endonuclease III homolog (AHRD V3.3 *** M1A6B0_SOLTU)
Solyc09g083130.3	SL3.0ch09	69229199	69229489	LastExon	UTR3	UTR3	11.7422	10.3361	15.7508	5.5505	5.59283	4.93865	2.35226	0.044523	Acylamino-acid-releasing enzyme (AHRD V3.3 *** A0A151R6E1_CAJCA)
Solyc09g089660.3	SL3.0ch09	69897461	69897876	LastIntron	UTR3	UTR3	12.5111	9.84373	12.873	8.37296	7.50687	6.07088	1.60486	0.0234495	Actin-related protein (AHRD V3.3 *** A0A103XII1_CYNCS)
Solyc09g090200.3	SL3.0ch09	70241444	70241874	LastExon	LastExon	UTR3	3.68071	3.53946	3.69337	1.72295	1.9386	1.584	2.08054	0.000620183	Kinase family protein (AHRD V3.3 *** B9HKH3_POPTR)
Solyc09g090570.2	SL3.0ch09	70538302	70538731	LastIntron	LastIntron	LastIntron	6.04136	5.70881	6.58141	3.95703	4.20188	3.39563	1.58653	0.00296713	proton gradient regulation 5 (AHRD V3.3 *** AT2G05620.2)
Solyc09g090580.3	SL3.0ch09	70538302	70538731	Intron3	UTR3	UTR3	6.04136	5.70881	6.58141	3.95703	4.20188	3.39563	1.58653	0.00296713	translation initiation factor iso4E
Solyc09g090960.3	SL3.0ch09	70818385	70818658	LastIntron	Intergenic	Intergenic	10.1536	8.28529	11.024	6.70601	5.74905	6.26358	1.57398	0.0360826	RNA-binding (RRM/RBD/RNP motifs) family protein (AHRD V3.3 *** AT1G60000.1)
Solyc09g091050.3	SL3.0ch09	70874646	70875267	Intron16	LastIntron	UTR3	5.08863	4.69819	6.30256	3.49518	3.36276	3.19275	1.60082	0.0490139	Calcium-dependent lipid-binding (CaLB domain) family protein (AHRD V3.3 *-* AT5G04220.1)
Solyc09g091190.3	SL3.0ch09	70984083	70984518	LastIntron	UTR3	Intergenic	9.88095	8.1915	10.1187	5.88957	6.83364	4.9711	1.59323	0.0128801	PHD finger protein ING (AHRD V3.3 *** K4CWE5_SOLLC)
Solyc09g091470.3	SL3.0ch09	71222785	71223206	LastIntron	LastExon	UTR3	3.76811	3.47001	4.1137	1.96214	1.8912	1.77052	2.01851	0.00574646	3-ketoacyl-CoA thiolase (AHRD V3.3 *** P93112_9ROSI)
Solyc09g091930.3	SL3.0ch09	71608190	71608418	LastExon	UTR3	UTR3	4.03708	4.01339	4.22437	2.84552	3.01075	2.22808	1.51835	0.0213636	Ubiquitin carboxyl-terminal hydrolase (AHRD V3.3 *** G7JA39_MEDTR)
Solyc09g092240.3	SL3.0ch09	71842400	71842820	LastExon	UTR3	UTR3	4.45318	4.43219	4.58991	2.97342	3.22292	2.60895	1.53036	0.00886479	Small subunit processome component 20 like (AHRD V3.3 *** A0A0B2RDD2_GLYSO)
Solyc09g092250.3	SL3.0ch09	71871984	71872279	UTR3	UTR3	UTR3	2.39221	2.56363	2.09293	1.47438	1.62651	1.34652	1.58492	0.0100183	Zinc finger transcription factor 55
Solyc09g098070.3	SL3.0ch09	72475044	72475283	LastExon	UTR3	UTR3	2.06045	1.88302	1.93569	1.04952	1.21812	1.2468	1.67286	0.000700486	MACPF domain protein (AHRD V3.3 *** G7LHB4_MEDTR)
Solyc09g098330.3	SL3.0ch09	72675433	72675751	LastExon	UTR3	UTR3	6.82067	5.59629	7.17059	2.9954	3.25774	3.05531	2.10428	0.0167338	Transducin/WD40 repeat-like superfamily protein (AHRD V3.3 *** AT5G56190.3)
Solyc09g098500.3	SL3.0ch09	72817938	72818153	LastIntron	LastIntron	LastIntron	10.7955	8.55651	11.8234	6.53273	7.98214	5.9089	1.52643	0.0438886	Got1/Sft2-like vescicle transport protein family (AHRD V3.3 *** AT1G05785.7)
Solyc09g098580.3	SL3.0ch09	72894483	72894755	LastExon	LastExon	UTR3	6.47076	5.56703	6.23185	3.76241	4.36476	3.06935	1.63172	0.00891437	Rela-spot homolog family protein (AHRD V3.3 *** B9I9P5_POPTR)
Solyc09g098590.3	SL3.0ch09	72894483	72894755	Intron27	Intron27	Intron27	6.47076	5.56703	6.23185	3.76241	4.36476	3.06935	1.63172	0.00891437	sucrose synthase
Solyc10g005180.3	SL3.0ch10	145288	145680	LastExon	LastExon	Intergenic	21.1668	14.5263	22.2626	9.32129	8.41489	8.2276	2.23217	0.0453243	Ycf3-interacting protein 1, chloroplastic (AHRD V3.3 *** Y3IP1_TOBAC)
Solyc10g005310.3	SL3.0ch10	222006	222348	LastExon	UTR3	UTR3	8.72555	6.89709	9.48291	5.98128	5.82266	4.61512	1.52905	0.0429915	Adenosine deaminase, putative (AHRD V3.3 *** B9RXP2_RICCO)
Solyc10g006300.3	SL3.0ch10	948322	948597	LastExon	Intergenic	Intergenic	11.9487	9.20118	10.116	2.87714	2.53826	2.06529	4.17955	0.00654722	Purple acid phosphatase (AHRD V3.3 *** K4CXG1_SOLLC)
Solyc10g006340.3	SL3.0ch10	968346	968695	UTR3	UTR3	UTR3	7.84743	6.44252	8.34532	4.77223	5.15392	4.55188	1.56342	0.0320872	Kinase family protein (AHRD V3.3 *** U5GUL9_POPTR)
Solyc10g006350.3	SL3.0ch10	968346	968695	UTR3	UTR3	UTR3	7.84743	6.44252	8.34532	4.77223	5.15392	4.55188	1.56342	0.0320872	CONSTANS interacting protein 7
Solyc10g006370.3	SL3.0ch10	989750	990048	LastExon	LastExon	UTR3	3.44286	3.58649	2.80289	2.14604	2.43109	1.75139	1.55364	0.0213209	Lhcp translocation defect-like protein (AHRD V3.3 *** A0A0B0PFC4_GOSAR)
Solyc10g006840.3	SL3.0ch10	1274840	1275163	Intergenic	UTR5	Intergenic	13.448	10.9485	12.8585	7.01901	8.48847	6.19392	1.71671	0.00706666	P-loop containing nucleoside triphosphate hydrolases superfamily protein (AHRD V3.3 --* AT1G72660.3)
Solyc10g007000.3	SL3.0ch10	1397605	1397926	LastExon	UTR3	UTR3	6.13865	5.01538	5.77601	3.18122	3.19986	3.13992	1.77818	0.0172639	Ubiquitin conjugating enzyme, putative (AHRD V3.3 *** B9T0E4_RICCO)
Solyc10g007050.3	SL3.0ch10	1429354	1429660	LastExon	Intergenic	Intergenic	13.0646	10.3858	13.8656	8.13793	7.64211	5.51536	1.75231	0.0179166	Methylthioribulose 1-phosphate dehydratase / enolase-phosphatase E1 (AHRD V3.3 *-* A0A061R779_9CHLO)
Solyc10g007150.3	SL3.0ch10	1556395	1556807	Exon16	Exon16	UTR3	5.18849	4.85247	5.30537	3.2151	3.74994	2.8018	1.57127	0.00964797	Apoptosis inhibitory 5 (AHRD V3.3 *** A0A103XEZ4_CYNCS)
Solyc10g007590.3	SL3.0ch10	1876832	1877274	LastIntron	UTR3	Intergenic	8.63321	6.98258	8.83853	4.53359	4.60701	4.19417	1.83388	0.0202906	CTC-interacting domain protein (AHRD V3.3 *** A0A072V9E0_MEDTR)
Solyc10g007610.3	SL3.0ch10	1908673	1909167	UTR3	UTR3	UTR3	8.98132	6.7833	9.13873	5.90446	5.08265	4.77605	1.57984	0.0404417	Nucleotide/sugar transporter family protein (AHRD V3.3 *** AT3G14410.1)
Solyc10g008630.3	SL3.0ch10	2699480	2699846	LastExon	LastExon	UTR3	9.5784	7.09437	10.1018	4.73589	4.16422	4.48088	2.00094	0.037012	External alternative NAD(P)H-ubiquinone oxidoreductase B1, mitochondrial (AHRD V3.3 *** ENDB1_SOLTU)
Solyc10g008990.3	SL3.0ch10	3013737	3014173	Intron10	LastIntron	Intergenic	8.6924	7.29408	8.88115	5.56743	6.08985	4.83144	1.50816	0.0131833	UPF0533 protein C5orf44 like (AHRD V3.3 *-* A0A0B2PQR4_GLYSO)
Solyc10g009130.3	SL3.0ch10	3124288	3124554	LastIntron	UTR3	UTR3	22.0103	17.1465	24.4152	9.2282	8.8018	7.39063	2.50081	0.0214469	nuclear fusion defective 6 (AHRD V3.3 *-* AT2G20585.5)
Solyc10g011700.3	SL3.0ch10	3963594	3963926	LastExon	Intergenic	Intergenic	8.38899	8.51817	8.797	5.16703	5.54417	4.84276	1.65258	0.000469922	RNA-binding KH domain-containing protein (AHRD V3.3 --* AT1G14170.3)
Solyc10g011740.3	SL3.0ch10	3970441	3970833	LastExon	UTR3	UTR3	4.03627	3.77648	4.33261	2.62447	2.84076	2.42718	1.53887	0.00281896	Ubiquitin-conjugating enzyme E2, putative (AHRD V3.3 *** B9T334_RICCO)
Solyc10g018600.2	SL3.0ch10	8778030	8778454	LastExon	LastExon	Intergenic	6.36895	5.29689	6.77262	4.11156	3.42902	3.53715	1.66446	0.0167863	Cationic amino acid transporter, putative (AHRD V3.3 *** B9RD13_RICCO)
Solyc10g037960.2	SL3.0ch10	18159846	18160281	LastExon	LastExon	Intergenic	13.579	9.96578	14.3729	7.3389	6.65137	6.40101	1.85951	0.0448745	2-oxoglutarate (2OG) and Fe(II)-dependent oxygenase superfamily protein (AHRD V3.3 *-* AT5G48020.1)
Solyc10g038130.2	SL3.0ch10	19812182	19812547	LastIntron	UTR3	Intergenic	16.5395	11.8473	15.5966	9.35166	7.61878	8.57281	1.72192	0.038465	Pectinacetylesterase family protein (AHRD V3.3 *** AT2G46930.1)
Solyc10g044450.2	SL3.0ch10	26395918	26396398	UTR3	UTR3	UTR3	14.7067	11.7666	14.6699	8.80862	9.1266	7.74268	1.60228	0.0208645	Regulator of nonsense transcripts 3A (AHRD V3.3 *** A0A151T884_CAJCA)
Solyc10g044480.2	SL3.0ch10	26476850	26477263	UTR3	UTR3	UTR3	9.92858	7.98377	10.2318	4.43631	4.90557	4.0055	2.10859	0.0118333	Transmembrane 9 superfamily member (AHRD V3.3 *** K4CZH3_SOLLC)
Solyc10g044740.2	SL3.0ch10	27619018	27619409	LastExon	LastExon	UTR3	9.30427	7.89625	10.075	5.8958	6.73692	5.16518	1.53251	0.0191609	Eukaryotic aspartyl protease family protein (AHRD V3.3 *** G7JCS6_MEDTR)
Solyc10g044910.2	SL3.0ch10	28865101	28865561	LastIntron	LastExon	UTR3	14.5927	11.4991	14.7668	9.02206	9.97106	7.77082	1.52663	0.0275058	etoposide-induced protein (AHRD V3.3 *** AT4G06676.1),Pfam:PF07264
Solyc10g045310.2	SL3.0ch10	32599016	32599384	UTR3	UTR3	UTR3	6.77433	4.87209	6.08987	2.86878	3.59454	2.38707	2.00401	0.0158438	Oxidoreductase/ transition metal ion binding protein (AHRD V3.3 *** D7MCM0_ARALL)
Solyc10g045550.2	SL3.0ch10	34539829	34540052	LastExon	LastExon	UTR3	3.05838	2.85794	3.81791	2.2058	2.27673	1.92286	1.51969	0.0493256	Ras-related protein, expressed (AHRD V3.3 *** D8L9F8_WHEAT)
Solyc10g047000.2	SL3.0ch10	39076491	39076936	LastIntron	UTR3	Intergenic	13.7414	10.5915	14.3451	8.62133	8.27573	7.62668	1.57716	0.0485307	Transducin/WD40 repeat-like superfamily protein (AHRD V3.3 *** AT1G80670.1)
Solyc10g047960.2	SL3.0ch10	43166110	43166797	LastExon	UTR3	UTR3	7.56853	7.06939	7.90662	5.00077	5.63331	4.16	1.52389	0.0115911	transmembrane protein (AHRD V3.3 *** AT5G65810.1)
Solyc10g049710.2	SL3.0ch10	46347564	46347931	LastExon	LastExon	UTR3	5.94545	5.14269	6.21973	3.47483	3.7427	3.09328	1.67861	0.00673529	ATP-dependent Clp protease proteolytic subunit (AHRD V3.3 *** K4D0C8_SOLLC)
Solyc10g051340.2	SL3.0ch10	51888795	51889251	Intron9	UTR3	UTR3	3.68184	3.41221	3.9675	2.25684	2.47546	1.95484	1.65415	0.00273146	Adenylyl cyclase-associated protein (AHRD V3.3 *** K4D0T6_SOLLC)
Solyc10g074590.2	SL3.0ch10	58206379	58207047	LastIntron	UTR3	UTR3	11.9838	9.18934	12.7585	7.22312	6.84783	6.04475	1.68682	0.0406955	pantothenate kinase (AHRD V3.3 *** AT4G35360.2)
Solyc10g074700.2	SL3.0ch10	58382857	58383226	UTR3	UTR3	Intergenic	8.6648	7.88626	8.9485	5.90751	5.75694	4.80442	1.54835	0.00310539	Ethanolamine-phosphate cytidylyltransferase (AHRD V3.3 *** PECT1_ARATH)
Solyc10g074790.2	SL3.0ch10	58573407	58573776	LastExon	LastExon	UTR3	5.31937	4.48257	5.43617	1.98861	2.14431	1.78578	2.57457	0.00490273	Auxin efflux carrier family protein (AHRD V3.3 *** AT5G01990.1)
Solyc10g074890.2	SL3.0ch10	58651516	58651839	LastExon	UTR3	UTR3	4.30048	3.74471	4.77485	2.32538	2.39724	2.27004	1.83336	0.0213386	Protein kinase-like protein (AHRD V3.3 *** A0A0K9Q444_ZOSMR)
Solyc10g076740.2	SL3.0ch10	59781454	59781798	LastExon	UTR3	Intergenic	7.30308	6.05451	7.38526	4.42958	5.06982	4.2885	1.50442	0.0164686	GDSL esterase/lipase family (AHRD V3.3 *** A0A151RQI9_CAJCA)
Solyc10g078420.2	SL3.0ch10	60369530	60369843	UTR3	UTR3	UTR3	5.89856	5.36098	5.3138	3.87818	3.9831	3.11985	1.50925	0.00688689	transmembrane protein (AHRD V3.3 *** AT5G09225.1)
Solyc10g078930.2	SL3.0ch10	60700870	60701222	LastIntron	UTR3	UTR3	6.20141	5.92502	6.35867	4.21443	4.01517	3.67057	1.55335	0.000536101	Activator of 90 kDa heat shock ATPase (AHRD V3.3 *** A0A0B0MWI3_GOSAR)
Solyc10g079430.2	SL3.0ch10	61094231	61094595	UTR3	UTR3	UTR3	4.81002	3.97061	4.7653	2.86937	3.35196	2.34642	1.58104	0.0141906	U3 small nucleolar RNA-associated protein 11 (AHRD V3.3 *** A5B5S2_VITVI)
Solyc10g079440.2	SL3.0ch10	61094231	61094595	UTR3	UTR3	UTR3	4.81002	3.97061	4.7653	2.86937	3.35196	2.34642	1.58104	0.0141906	FAD-dependent oxidoreductase family protein (AHRD V3.3 *** AT3G56840.1)
Solyc10g079450.2	SL3.0ch10	61122037	61122388	UTR3	Intergenic	Intergenic	4.3627	4.05189	4.54747	2.65685	3.25302	2.65339	1.51368	0.00531768	S-adenosyl-L-methionine-dependent methyltransferases superfamily protein (AHRD V3.3 *** AT3G10200.1)
Solyc10g079610.2	SL3.0ch10	61249530	61249864	LastExon	Intergenic	Intergenic	5.58663	5.35595	6.29885	3.68136	4.56765	3.00202	1.53243	0.0275454	Strictosidine synthase, putative (AHRD V3.3 *** B9T2X5_RICCO)
Solyc10g080020.2	SL3.0ch10	61568437	61568754	LastExon	LastExon	Intergenic	7.51325	6.33699	7.99565	4.52685	4.32126	3.80502	1.72652	0.0137059	F-box/LRR protein (AHRD V3.3 *** AT5G63520.1)
Solyc10g080070.2	SL3.0ch10	61599055	61599342	UTR3	UTR3	UTR3	23.8907	17.9484	25.5008	15.1847	13.5788	11.6785	1.6651	0.0431095	Mitochondrial GTPase 1 (AHRD V3.3 *** A0A0B0PKU7_GOSAR)
Solyc10g080080.2	SL3.0ch10	61599055	61599342	LastIntron	UTR3	UTR3	23.8907	17.9484	25.5008	15.1847	13.5788	11.6785	1.6651	0.0431095	Thioredoxin reductase (AHRD V3.3 *** K4D2P9_SOLLC)
Solyc10g080110.2	SL3.0ch10	61635418	61635730	LastExon	UTR3	UTR3	9.85144	7.639	9.72175	5.57799	6.86484	5.28621	1.53489	0.0271512	Cytoplasmic tRNA 2-thiolation protein 2 (AHRD V3.3 *-* K4D2Q2_SOLLC)
Solyc10g080190.1	SL3.0ch10	61674232	61674649	LastExon	Intergenic	Intergenic	3.88963	3.66032	3.90819	2.25028	2.4543	2.02053	1.70378	0.00101482	LOW QUALITY:Ozone-responsive stress related protein (AHRD V3.3 *** I0J1A1_ORYRU)
Solyc10g080280.2	SL3.0ch10	61732576	61732941	LastExon	LastExon	UTR3	7.23115	6.3883	7.20368	4.33683	4.10242	3.68752	1.71712	0.00166882	RING/FYVE/PHD zinc finger superfamily protein, putative (AHRD V3.3 *** A0A061GYX1_THECC)
Solyc10g080630.2	SL3.0ch10	61982311	61983112	LastExon	Intergenic	Intergenic	3.75949	3.13646	3.70032	2.25074	2.41021	2.14188	1.55763	0.0141588	ripening related X72734
Solyc10g080720.2	SL3.0ch10	62055582	62055987	LastExon	UTR3	UTR3	8.34679	7.04645	7.83073	5.14711	5.55621	4.43028	1.5346	0.00608147	Polypyrimidine tract-binding-like protein (AHRD V3.3 *** G7IBX9_MEDTR)
Solyc10g080940.2	SL3.0ch10	62255699	62255927	LastExon	UTR3	UTR3	1.68288	1.8383	1.59269	1.09072	1.13528	1.10345	1.53595	0.0120715	Tubulin beta chain (AHRD V3.3 *** TBB_HORVU)
Solyc10g081250.2	SL3.0ch10	62500338	62500706	UTR3	UTR3	Intergenic	20.7318	15.267	22.0039	9.49736	8.3914	9.07429	2.1512	0.0349672	DNA polymerase (AHRD V3.3 *** K4D312_SOLLC)
Solyc10g081360.2	SL3.0ch10	62582253	62582711	LastIntron	UTR3	Intergenic	17.2166	14.7713	18.8104	12.7357	10.5405	10.2028	1.51732	0.0197009	HSP20-like chaperones superfamily protein (AHRD V3.3 *** AT3G03773.1)
Solyc10g081370.2	SL3.0ch10	62590074	62590426	LastIntron	LastExon	Intergenic	6.6361	5.65723	6.86866	4.19697	4.54241	4.01147	1.5028	0.0172304	small nuclear ribonucleoprotein F (AHRD V3.3 *** AT4G30220.1)
Solyc10g081470.2	SL3.0ch10	62651861	62652199	LastExon	UTR3	UTR3	11.6952	10.1546	11.7146	4.02095	5.33931	3.7011	2.56975	0.000690484	lutescent-2
Solyc10g081510.2	SL3.0ch10	62694643	62694992	LastExon	LastExon	UTR3	1.9842	2.19982	2.14864	1.39868	1.3745	1.39908	1.5178	0.00733871	ethylene-responsive methionine synthase
Solyc10g081530.2	SL3.0ch10	62694643	62694992	Intron10	Intron10	Intron10	1.9842	2.19982	2.14864	1.39868	1.3745	1.39908	1.5178	0.00733871	V-type proton ATPase subunit d2 (AHRD V3.3 *** VA0D2_ARATH)
Solyc10g081530.2	SL3.0ch10	62697892	62698435	Intron9	UTR3	UTR3	8.88565	7.9504	9.21364	5.57383	6.24292	4.87211	1.5609	0.00471529	V-type proton ATPase subunit d2 (AHRD V3.3 *** VA0D2_ARATH)
Solyc10g081710.2	SL3.0ch10	62856210	62856542	LastIntron	UTR3	UTR3	9.32967	7.12172	9.02114	6.34728	4.92093	4.82427	1.58288	0.0251195	RING/U-box superfamily protein (AHRD V3.3 *-* AT5G15790.4)
Solyc10g081830.2	SL3.0ch10	62930164	62930509	LastExon	Intergenic	Intergenic	8.23879	6.55459	9.06559	4.93294	4.62014	4.66116	1.67853	0.0467696	Replication protein A subunit (AHRD V3.3 *** A0A1D1Z493_9ARAE)
Solyc10g083270.3	SL3.0ch10	63229060	63229325	LastExon	LastExon	UTR3	5.38091	5.20539	5.46937	3.34437	3.2428	2.7846	1.71319	0.00186164	alpha/beta hydrolase domain-containing protein 11-like (ABHD11)
Solyc10g083490.2	SL3.0ch10	63400961	63401472	LastIntron	UTR3	Intergenic	15.1425	11.901	14.0446	8.18822	9.01679	7.46982	1.66518	0.0157758	Cell division protein ftsZ, putative (AHRD V3.3 *** B9SRX2_RICCO)
Solyc10g083590.2	SL3.0ch10	63493385	63493937	UTR3	Intergenic	Intergenic	12.5873	10.8731	13.361	8.26138	8.99743	6.9855	1.51876	0.0124725	Pre-mRNA cleavage complex 2 protein Pcf11 (AHRD V3.3 *** W9R453_9ROSA)
Solyc10g083630.2	SL3.0ch10	63531344	63531681	LastExon	UTR3	UTR3	4.06733	3.50931	4.20222	1.77972	2.00591	1.66616	2.16055	0.00356416	DNA demethylase 2
Solyc10g083640.2	SL3.0ch10	63555007	63555411	UTR3	UTR3	Intergenic	7.29491	6.46959	7.27899	2.96962	2.75409	2.61673	2.52307	0.00158462	Zinc finger transcription factor 64
Solyc10g083720.2	SL3.0ch10	63616344	63616819	LastExon	LastExon	UTR3	8.00918	6.86212	8.282	3.1966	3.8758	2.74433	2.35856	0.00166448	Pyruvate kinase family protein (AHRD V3.3 *** AT3G52990.1)
Solyc10g083760.2	SL3.0ch10	63636929	63637267	LastExon	UTR3	UTR3	3.43708	3.10545	3.80166	2.22722	2.43935	2.11871	1.52451	0.0147586	chloroplast threonine deaminase 1 precursor
Solyc10g084040.2	SL3.0ch10	63836875	63837164	LastIntron	UTR3	UTR3	7.04963	5.59042	7.96423	4.27467	4.14836	3.5255	1.72442	0.0415801	Thylakoid lumenal 15.0 kDa protein 2, chloroplastic (AHRD V3.3 *** TL15B_ARATH)
Solyc10g085320.2	SL3.0ch10	64670532	64671055	LastExon	LastExon	UTR3	8.24733	7.21056	9.03077	5.39522	6.03258	4.53278	1.53432	0.0152197	Trichome birefringence-like protein (AHRD V3.3 *** G7JKP3_MEDTR)
Solyc10g085555.1	SL3.0ch10	64799988	64800438	LastExon	Intergenic	Intergenic	15.1467	12.1304	15.328	9.25927	9.51875	8.50427	1.56164	0.0306141	Enolase (AHRD V3.3 *** AT2G36530.1)
Solyc10g085560.2	SL3.0ch10	64802142	64802565	LastIntron	UTR3	UTR3	8.04014	6.68511	7.9723	4.51489	5.18487	4.48833	1.59976	0.0106451	Histone deacetylase HDT1 (AHRD V3.3 *** HDT1_SOLCH)
Solyc10g086133.1	SL3.0ch10	65201186	65201549	Intergenic	Intron1	Intron1	8.38943	7.32862	8.82663	5.45568	4.45433	4.40088	1.7151	0.00453616	ATP synthase subunit a, chloroplastic (AHRD V3.3 --* ATPI_MESVI)
Solyc10g086150.2	SL3.0ch10	65201186	65201549	LastIntron	UTR3	UTR3	8.38943	7.32862	8.82663	5.45568	4.45433	4.40088	1.7151	0.00453616	RNA-binding (RRM/RBD/RNP motifs) family protein (AHRD V3.3 *** AT2G37220.1)
Solyc10g086330.2	SL3.0ch10	65319166	65319542	LastIntron	Intergenic	Intergenic	13.1043	11.18	14.3275	8.35234	8.11777	7.18958	1.63197	0.020966	60S ribosomal protein L23a (AHRD V3.3 *** RL23A_DAUCA)
Solyc10g086335.1	SL3.0ch10	65319166	65319542	Intron2	UTR5	UTR5	13.1043	11.18	14.3275	8.35234	8.11777	7.18958	1.63197	0.020966	Kinesin-related protein (AHRD V3.3 *** A0A0B0NAJ1_GOSAR)
Solyc11g005910.2	SL3.0ch11	739725	740401	UTR3	UTR3	Intergenic	4.92828	3.82914	4.9426	2.84026	3.34909	2.52227	1.57262	0.0255546	Phosphatidylinositol 4-kinase family protein (AHRD V3.3 *** B9HEK1_POPTR)
Solyc11g006400.2	SL3.0ch11	1106475	1106865	LastExon	LastExon	UTR3	8.34898	6.99569	8.33865	4.58358	4.99062	3.51388	1.80953	0.0049558	Mitochondrial glycoprotein family protein, putative (AHRD V3.3 *** A0A061G4T0_THECC)
Solyc11g006490.2	SL3.0ch11	1172658	1173001	UTR3	UTR3	UTR3	7.6267	6.92048	7.19142	4.24741	4.22923	3.65098	1.79249	0.000356661	Basic-leucine zipper (bZIP) transcription factor family protein (AHRD V3.3 *** AT2G42380.2)
Solyc11g006500.2	SL3.0ch11	1172658	1173001	LastIntron	UTR3	UTR3	7.6267	6.92048	7.19142	4.24741	4.22923	3.65098	1.79249	0.000356661	Charged multivesicular body protein 5 (AHRD V3.3 *** W9R7A4_9ROSA)
Solyc11g006970.2	SL3.0ch11	1483201	1483662	LastIntron	LastExon	UTR3	9.80483	8.43731	10.4702	6.10373	6.25709	5.35346	1.62086	0.0134108	ACT domain-containing protein
Solyc11g007580.2	SL3.0ch11	1813961	1814341	LastExon	UTR3	UTR3	6.60234	5.23401	6.16963	4.02095	3.75071	3.54711	1.59081	0.0220402	DNA demethylase 3
Solyc11g007690.2	SL3.0ch11	1933850	1934170	UTR3	Intron16	LastIntron	5.51985	5.74863	5.23542	2.93975	3.8028	2.50468	1.78474	0.0144115	Pyruvate kinase (AHRD V3.3 *** K4D530_SOLLC)
Solyc11g007990.2	SL3.0ch11	2203869	2204222	LastIntron	LastExon	UTR3	12.0213	9.95101	11.7293	7.47134	7.78665	5.77803	1.6021	0.00935116	chloroplast malate dehydrogenase (mdh)
Solyc11g008340.2	SL3.0ch11	2550743	2551173	LastExon	LastExon	UTR3	8.84464	7.22969	9.24304	5.42119	5.571	4.88158	1.59492	0.0262407	Exocyst complex component Sec8 family protein (AHRD V3.3 *** U5G1P5_POPTR)
Solyc11g008620.2	SL3.0ch11	2807037	2807409	LastExon	UTR3	UTR3	7.24548	6.42026	7.41375	4.48177	4.11027	3.87878	1.69031	0.0031408	Phosphoglycolate phosphatase (AHRD V3.3 *** A0A0V0I1W8_SOLCH)
Solyc11g008720.2	SL3.0ch11	2901048	2901360	LastExon	LastExon	UTR3	4.61057	3.98684	5.04294	2.48849	2.33056	2.36409	1.89894	0.0177362	Beta-glucosidase (AHRD V3.3 *** K4D5D2_SOLLC)
Solyc11g008770.2	SL3.0ch11	2938150	2938787	LastIntron	UTR3	UTR3	18.0963	14.0269	19.8683	10.4374	10.9038	9.2953	1.69705	0.0457842	LETM1 and EF-hand domain-containing protein 1 (AHRD V3.3 *** A0A061EI71_THECC)
Solyc11g010450.2	SL3.0ch11	3505719	3506314	Exon13	Intron13	Intron13	7.96704	6.65392	8.74566	4.92025	5.49467	4.2863	1.58943	0.02331	ATP-dependent 6-phosphofructokinase (AHRD V3.3 *** K4D5K6_SOLLC)
Solyc11g010950.2	SL3.0ch11	4003090	4003420	UTR3	UTR3	Intergenic	10.2783	8.80794	10.7482	6.30869	6.96587	5.18763	1.61597	0.0086372	Elongator complex 4 (AHRD V3.3 *** A0A0B0P040_GOSAR)
Solyc11g011040.2	SL3.0ch11	4089545	4089883	LastIntron	UTR3	UTR3	10.0492	8.27481	10.2411	6.37646	6.07581	5.08101	1.62919	0.0118424	ADP-ribosylation factor, putative (AHRD V3.3 *** B9SYE9_RICCO)
Solyc11g011085.1	SL3.0ch11	4167588	4167826	LastIntron	LastIntron	LastIntron	3.0987	3.236	2.83722	1.89221	2.20225	1.69921	1.58309	0.00450276	Ubiquitin carboxyl-terminal hydrolase-related protein (AHRD V3.3 --* AT1G65130.5)
Solyc11g011250.2	SL3.0ch11	4291251	4291626	LastIntron	UTR3	UTR3	10.4758	8.31222	11.0531	6.43219	6.68	5.75138	1.58195	0.0373935	dehydroascorbate reductase 2
Solyc11g011940.2	SL3.0ch11	4876889	4877276	UTR3	UTR3	UTR3	4.95946	4.083	5.82663	1.55513	1.72601	1.69497	2.9881	0.0215431	Homeobox-leucine zipper family protein (AHRD V3.3 *-* B9N3B2_POPTR)
Solyc11g012080.2	SL3.0ch11	5019369	5019716	LastIntron	LastExon	Intergenic	10.3059	8.08517	10.6384	6.32659	6.4323	5.44304	1.59486	0.0326254	Mitochondrial pyruvate carrier (AHRD V3.3 *** K4D613_SOLLC)
Solyc11g012480.2	SL3.0ch11	5318433	5318786	LastExon	LastExon	Intergenic	9.79592	8.09992	9.14435	5.81062	5.96628	5.22604	1.59032	0.0105112	Thymidine kinase (AHRD V3.3 *** K4D652_SOLLC)
Solyc11g012840.2	SL3.0ch11	5643316	5643578	LastExon	LastExon	UTR3	3.41581	3.16903	3.60913	2.0776	2.40682	1.74619	1.63611	0.00678472	BTB/POZ domain-containing protein
Solyc11g012850.2	SL3.0ch11	5643316	5643578	UTR3	UTR3	UTR3	3.41581	3.16903	3.60913	2.0776	2.40682	1.74619	1.63611	0.00678472	Chlorophyllide a oxygenase (AHRD V3.3 *** W9SD87_9ROSA)
Solyc11g013100.2	SL3.0ch11	5955234	5955903	Exon3	LastExon	UTR3	8.00296	6.18042	8.52351	4.95258	4.41902	4.25367	1.66653	0.0415956	Glycine-rich protein (AHRD V3.3 *** R4L3H8_CANWI)
Solyc11g013460.2	SL3.0ch11	6494442	6494774	LastExon	LastExon	UTR3	13.7534	10.7354	12.8861	7.40373	7.44873	6.35403	1.76243	0.0161362	dephospho-CoA kinase family (AHRD V3.3 *** AT2G27490.4)
Solyc11g013467.1	SL3.0ch11	6494442	6494774	Intron3	Intron3	Intron3	13.7534	10.7354	12.8861	7.40373	7.44873	6.35403	1.76243	0.0161362	NBS-LRR disease resistance-like protein (AHRD V3.3 *-* Q2LEF8_9ROSI)
Solyc11g013750.2	SL3.0ch11	7107782	7108196	Exon4	Exon4	Exon4	4.16793	3.66048	4.03046	2.35383	2.61517	2.39752	1.60983	0.00296722	Disease resistance protein (TIR-NBS-LRR class) family (AHRD V3.3 *** AT5G36930.4)
Solyc11g013830.2	SL3.0ch11	7258919	7259224	UTR3	UTR3	UTR3	3.1723	2.97025	3.74828	2.15802	1.89659	1.58154	1.75489	0.0100038	1-phosphatidylinositol-3-phosphate 5-kinase (AHRD V3.3 *** W9QXB1_9ROSA)
Solyc11g017250.2	SL3.0ch11	8093366	8093735	UTR3	UTR3	UTR3	6.51367	5.94917	5.99252	4.07869	4.24336	3.66811	1.53921	0.00100023	Dihydrolipoamide acetyltransferase component of pyruvate dehydrogenase complex (AHRD V3.3 *** K4D6M8_SOLLC)
Solyc11g018550.3	SL3.0ch11	8678139	8678365	LastIntron	LastExon	UTR3	4.00198	3.91892	4.32997	2.5268	2.73756	2.67783	1.5425	0.00216554	ascorbate peroxidase 6
Solyc11g020060.2	SL3.0ch11	10051134	10051430	LastIntron	UTR3	UTR3	16.4367	11.9127	16.9069	4.7576	4.75919	4.05361	3.33492	0.0201239	D-3-phosphoglycerate dehydrogenase (AHRD V3.3 *** A0A0B2QT46_GLYSO)
Solyc11g020300.2	SL3.0ch11	10749225	10749652	LastExon	UTR3	Intergenic	8.66718	7.17409	8.96536	5.22607	5.10687	4.59261	1.66202	0.0181953	Protein TIC 40, chloroplastic (AHRD V3.3 *** TIC40_PEA)
Solyc11g027810.2	SL3.0ch11	19108218	19108515	LastExon	UTR3	UTR3	12.614	10.1368	12.4386	6.35429	6.86171	5.96122	1.83496	0.0145283	RING finger protein (AHRD V3.3 *** A0A0B0PUN2_GOSAR)
Solyc11g030390.2	SL3.0ch11	21803277	21803618	LastIntron	UTR3	UTR3	21.1693	16.8021	21.4844	11.0679	9.38176	8.5476	2.05039	0.00996018	Elongation factor 4 (AHRD V3.3 *** A0A0B0MG27_GOSAR)
Solyc11g039950.2	SL3.0ch11	40784384	40784907	LastIntron	LastIntron	UTR3	11.8854	10.2205	13.6727	8.24147	7.83833	6.75193	1.56706	0.0334583	Ca(2+)-dependent nuclease family protein (AHRD V3.3 --* AT2G40410.2)
Solyc11g040120.2	SL3.0ch11	40046758	40047093	LastExon	UTR3	UTR3	5.31213	3.94334	5.29147	2.61278	2.77208	2.37295	1.87513	0.0312709	DNA helicase (AHRD V3.3 *** M0ZQ54_SOLTU)
Solyc11g045040.2	SL3.0ch11	32090434	32090884	UTR3	UTR3	UTR3	16.9021	13.6785	16.8059	8.76894	8.25349	7.17697	1.95817	0.00890426	Glycerophosphodiester phosphodiesterase family protein (AHRD V3.3 *** A0A072USJ9_MEDTR)
Solyc11g064850.2	SL3.0ch11	50389841	50390376	LastIntron	LastExon	UTR3	7.48042	6.08463	7.80468	4.57522	4.36374	4.07706	1.6418	0.0271593	Hyp O-arabinosyltransferase-like protein (AHRD V3.3 *** AT5G13500.3)
Solyc11g065110.2	SL3.0ch11	50732774	50733186	LastIntron	LastExon	UTR3	15.5091	12.5197	15.6348	10.2921	10.0478	8.49443	1.5143	0.0220988	Homeobox leucine zipper protein (AHRD V3.3 *** G7K365_MEDTR)
Solyc11g065640.2	SL3.0ch11	51462362	51462635	LastExon	LastExon	UTR3	7.43077	6.57229	8.02581	4.05803	4.20296	3.96933	1.80117	0.0144396	2Fe-2S ferredoxin (AHRD V3.3 *** A0A0B2PJW0_GLYSO)
Solyc11g065830.2	SL3.0ch11	51690926	51691190	UTR3	UTR3	UTR3	3.63347	3.23142	4.11605	1.99522	2.38592	1.96933	1.72915	0.0125067	2-oxoglutarate/malate translocator, chloroplastic (AHRD V3.3 *** A0A0B0P837_GOSAR)
Solyc11g066280.2	SL3.0ch11	52309354	52309604	LastIntron	LastExon	UTR3	4.10408	4.07837	4.43378	2.93494	2.69605	2.30905	1.58894	0.00366286	Ribosome production factor 1 (AHRD V3.3 *** A0A0B2P1B3_GLYSO)
Solyc11g066390.2	SL3.0ch11	52462247	52462709	Intron7	Exon8	UTR3	15.1852	11.9296	16.3913	9.43695	8.55708	8.5762	1.6374	0.0458933	superoxide dismutase 3
Solyc11g066470.1	SL3.0ch11	52508782	52509229	LastExon	Intergenic	Intergenic	7.88772	6.07738	8.50231	4.9297	3.74466	4.28346	1.73389	0.0320775	Pyridoxine/pyridoxamine 5'-phosphate oxidase (AHRD V3.3 --* A0A1D1ZJ14_9ARAE)
Solyc11g066620.2	SL3.0ch11	52692893	52693183	LastExon	LastExon	UTR3	2.12579	1.9631	2.10215	1.47809	1.34531	1.29883	1.50187	0.00074525	Eukaryotic aspartyl protease family protein (AHRD V3.3 *** AT5G22850.1)
Solyc11g066630.2	SL3.0ch11	52692893	52693183	UTR3	UTR3	UTR3	2.12579	1.9631	2.10215	1.47809	1.34531	1.29883	1.50187	0.00074525	AP2/B3-like transcriptional factor family protein (AHRD V3.3 --* AT2G24681.1)
Solyc11g067060.3	SL3.0ch11	53102256	53102610	LastIntron	UTR3	UTR3	10.6622	8.50086	10.6332	5.77205	6.65609	5.32169	1.67868	0.0148719	low molecular weight protein-tyrosine phosphatase
Solyc11g067090.2	SL3.0ch11	53138110	53138761	Intron12	Exon13	UTR3	7.31322	5.97785	7.48872	4.4831	5.22666	4.12317	1.5022	0.0204335	Peptidyl-prolyl cis-trans isomerase, putative (AHRD V3.3 *** A0A072VAB3_MEDTR)
Solyc11g067100.2	SL3.0ch11	53138110	53138761	UTR3	UTR3	UTR3	7.31322	5.97785	7.48872	4.4831	5.22666	4.12317	1.5022	0.0204335	60s acidic ribosomal family protein (AHRD V3.3 *** A9PCM7_POPTR)
Solyc11g067150.2	SL3.0ch11	53182446	53182721	LastExon	UTR3	Intergenic	16.159	13.4244	17.0335	10.0559	9.12934	8.14464	1.70571	0.0136703	transmembrane protein (AHRD V3.3 *** AT4G04190.1)
Solyc11g068520.2	SL3.0ch11	53519057	53519331	LastExon	LastExon	UTR3	13.578	9.4944	13.6189	8.46543	7.51862	5.41784	1.7144	0.0435982	Rho GTPase-activating protein (AHRD V3.3 *** A0A0K9PVR7_ZOSMR)
Solyc11g068745.1	SL3.0ch11	53675040	53675281	UTR3	UTR3	UTR3	20.1145	15.5614	21.1184	8.23551	6.32	8.15198	2.50113	0.013538	Diacylglycerol kinase (AHRD V3.3 --* B9RW81_RICCO)
Solyc11g069170.2	SL3.0ch11	54089620	54089996	LastExon	UTR3	UTR3	8.89731	7.12316	9.4883	5.80151	5.00928	4.89938	1.62371	0.0307474	Transmembrane protein 209 (AHRD V3.3 *** A0A0B2QKQ1_GLYSO)
Solyc11g069470.2	SL3.0ch11	54367150	54367469	LastExon	LastExon	UTR3	6.60992	5.29375	6.43394	2.8699	3.9388	2.62192	1.94448	0.00679073	Homeobox leucine-zipper protein (AHRD V3.3 *** Q8H962_ZINVI)
Solyc11g069790.2	SL3.0ch11	54713209	54713542	LastExon	UTR3	UTR3	7.94952	6.78884	7.93303	2.38344	2.51941	2.01053	3.27935	0.00202259	Chaperonin 60 alpha subunit (AHRD V3.3 *** Q9ZTV1_CANLI)
Solyc11g070130.2	SL3.0ch11	54952543	54952962	LastIntron	UTR3	Intergenic	3.40217	2.75699	3.49926	1.97212	1.93776	1.93854	1.65146	0.0317749	Profilin (AHRD V3.3 *** Q8VWR0_SOLLC)
Solyc11g071250.2	SL3.0ch11	55075950	55076362	LastExon	UTR3	UTR3	9.63319	8.14638	12.1438	4.63207	5.07762	4.82509	2.05874	0.0464873	Protein EMBRYONIC FLOWER 1-like protein (AHRD V3.3 *** A0A0B0NHJ8_GOSAR)
Solyc11g071260.2	SL3.0ch11	55088941	55089349	LastIntron	UTR3	UTR3	15.0992	12.2578	16.6578	9.76839	9.99014	8.70105	1.54657	0.0463063	DnaJ / Sec63 Brl domains-containing protein (AHRD V3.3 --* AT1G79940.4)
Solyc11g071680.2	SL3.0ch11	55372913	55373502	LastExon	UTR3	UTR3	11.7028	9.16227	11.8061	7.26373	7.06454	6.66499	1.55627	0.0412126	Tousled-like protein (AHRD V3.3 *** B2YHW0_SOLLC)
Solyc11g072010.2	SL3.0ch11	55596836	55597278	LastIntron	UTR3	UTR3	11.0752	8.75907	11.4124	5.84082	6.52559	5.09404	1.78957	0.0168841	Homoserine dehydrogenase (AHRD V3.3 *** K4DAQ8_SOLLC)
Solyc11g072220.2	SL3.0ch11	55744463	55744781	LastExon	Intergenic	Intergenic	11.7232	7.9907	10.9759	4.99096	5.63063	4.27448	2.06027	0.0328893	Ulp1 protease family protein, putative (AHRD V3.3 *** Q6L4B6_SOLDE)
Solyc11g072260.2	SL3.0ch11	55761421	55761931	LastIntron	UTR3	Intergenic	20.9615	16.2324	21.4126	12.2846	11.6131	10.2424	1.71665	0.02764	40S ribosomal protein S13 (AHRD V3.3 *** RS13_SOYBN)
Solyc11g072320.2	SL3.0ch11	55840599	55840864	Intron28	Intron28	Intron28	17.685	13.2417	17.1754	11.8446	9.92797	10.1788	1.50548	0.0454985	Arginine/serine-rich splicing factor RSP41, putative (AHRD V3.3 *-* Q0KIM7_SOLDE)
Solyc11g072330.2	SL3.0ch11	55840599	55840864	LastIntron	UTR3	UTR3	17.685	13.2417	17.1754	11.8446	9.92797	10.1788	1.50548	0.0454985	Two-component response regulator (AHRD V3.3 *-* W9QMB4_9ROSA)
Solyc11g072340.2	SL3.0ch11	55847183	55847544	LastExon	LastExon	Intergenic	5.07196	4.1747	5.37964	3.4164	3.22599	2.91096	1.53101	0.0291585	Arginine/serine-rich splicing factor RSP41, putative (AHRD V3.3 *** Q0KIM7_SOLDE)
Solyc12g005230.2	SL3.0ch12	153738	154029	Exon18	Exon18	LastIntron	12.7911	8.68869	11.9858	6.02795	5.1038	5.2333	2.04494	0.0393579	Breast carcinoma-amplified sequence 3 (AHRD V3.3 *** A0A0B0NHS9_GOSAR)
Solyc12g005410.2	SL3.0ch12	246692	246958	LastExon	UTR3	UTR3	5.7685	5.71272	5.81064	3.18085	3.94912	2.96815	1.71238	0.0144453	Sodium Bile acid symporter family (AHRD V3.3 *** AT1G78560.1)
Solyc12g005875.1	SL3.0ch12	511443	511910	Intron5	LastIntron	Intergenic	9.74701	8.21476	10.2339	5.16684	5.8274	4.69518	1.79712	0.00852241	NEDD8-activating enzyme E1 regulatory subunit (AHRD V3.3 *-* K4DBC5_SOLLC)
Solyc12g005930.2	SL3.0ch12	554008	554727	Exon6	LastIntron	UTR3	3.82425	4.12649	4.01944	2.2528	2.71607	2.22708	1.66346	0.00265531	Ypt/Rab-GAP domain of gyp1p superfamily protein (AHRD V3.3 *** AT3G07890.5)
Solyc12g006030.2	SL3.0ch12	626960	627378	LastExon	UTR3	UTR3	9.40098	8.00757	9.08273	5.28003	5.15343	4.80206	1.73878	0.00718257	Methyltransferase-like protein 5 (AHRD V3.3 *** A0A151TIR0_CAJCA)
Solyc12g006040.2	SL3.0ch12	626960	627378	Exon10	Intron10	Intron10	9.40098	8.00757	9.08273	5.28003	5.15343	4.80206	1.73878	0.00718257	NBS-LRR protein (AHRD V3.3 *** Q9SM52_SOLAC)
Solyc12g006250.2	SL3.0ch12	771933	772252	LastIntron	LastExon	UTR3	12.774	9.12449	12.8331	5.93305	4.99899	5.72751	2.08479	0.0334896	Protein transport protein SFT2, putative (AHRD V3.3 *** B9SF26_RICCO)
Solyc12g006320.2	SL3.0ch12	840874	841253	UTR3	UTR3	UTR3	4.40756	3.67154	4.54748	2.73366	2.59151	2.20929	1.67584	0.010473	RNA helicase DEAD35
Solyc12g006420.2	SL3.0ch12	902702	903060	UTR3	UTR3	UTR3	4.9806	4.46275	5.4398	3.14764	3.45394	2.78086	1.58628	0.00819434	Topoisomerase II-associated protein PAT1 (AHRD V3.3 *** AT4G14990.1)
Solyc12g006990.2	SL3.0ch12	1420162	1420525	LastIntron	UTR3	UTR3	20.2037	15.1359	20.4131	12.0803	11.9413	9.11577	1.68247	0.0292543	Arf GTPase activating protein (AHRD V3.3 *** A0A103Y2E2_CYNCS)
Solyc12g006993.1	SL3.0ch12	1420162	1420525	Intergenic	UTR5	UTR5	20.2037	15.1359	20.4131	12.0803	11.9413	9.11577	1.68247	0.0292543	delay of germination 1 (AHRD V3.3 --* AT5G45830.6)
Solyc12g007170.2	SL3.0ch12	1615052	1615453	LastIntron	LastExon	Intergenic	9.83165	8.41194	10.5916	6.6271	6.29955	5.53412	1.56197	0.0173994	Fatty acid beta-oxidation multifunctional protein (AHRD V3.3 *** A0A077DAS1_9ERIC)
Solyc12g007280.2	SL3.0ch12	1694125	1694557	UTR3	LastIntron	LastIntron	3.63127	3.42936	3.53679	2.47416	2.39341	2.09014	1.52312	0.00287556	Casein kinase family protein (AHRD V3.3 *** B9ILR0_POPTR)
Solyc12g008340.2	SL3.0ch12	1745927	1746369	LastExon	Intergenic	Intergenic	4.55367	4.16944	5.14149	2.99799	2.24158	2.05241	1.90135	0.0056213	Exostosin family protein (AHRD V3.3 *** AT5G19670.2)
Solyc12g008710.2	SL3.0ch12	2086352	2086790	LastExon	LastExon	Intergenic	11.667	10.7643	12.2962	6.66825	6.69619	5.86853	1.80562	0.00142413	Peptidase M16 family protein (AHRD V3.3 *** D7MM64_ARALL)
Solyc12g009050.2	SL3.0ch12	2340277	2340553	LastExon	UTR3	UTR3	3.63749	4.12767	3.89396	1.8152	2.13343	2.70812	1.75147	0.0104144	Nuclear transcription factor Y subunit (AHRD V3.3 *-* A0A0K9P8V1_ZOSMR)
Solyc12g009180.2	SL3.0ch12	2477579	2477911	Exon3	UTR3	LastIntron	4.49745	4.00476	4.97389	2.45642	2.62118	2.23412	1.84308	0.00973776	RmlC-like jelly roll fold protein (AHRD V3.3 *** AT1G19130.1)
Solyc12g009250.2	SL3.0ch12	2532057	2532361	LastExon	LastExon	Intergenic	4.27314	3.34447	4.37072	2.35921	2.12301	1.80452	1.90692	0.0147448	Chaperonin (AHRD V3.3 *** Q69QD5_ORYSJ)
Solyc12g009440.2	SL3.0ch12	2713944	2714488	Exon4	LastExon	Intergenic	6.27287	5.61572	6.6914	3.31906	3.75677	3.04209	1.83634	0.00288648	Chaperone DnaJ (AHRD V3.3 *** A0A0B0P8V3_GOSAR)
Solyc12g009570.2	SL3.0ch12	2827055	2827340	LastExon	UTR3	Intergenic	5.25644	5.34237	5.75254	2.9977	3.90681	3.27772	1.60587	0.00580599	calcineurin B-like interacting protein kinase
Solyc12g009810.2	SL3.0ch12	3011359	3011685	LastExon	UTR3	UTR3	4.42771	3.59014	4.67463	2.79897	3.15495	2.36526	1.52569	0.0265704	UDP-N-acetylglucosamine transferase subunit ALG13-like protein (AHRD V3.3 *** W9QX49_9ROSA)
Solyc12g009970.2	SL3.0ch12	3119989	3120204	LastExon	UTR3	UTR3	6.28172	7.29311	6.68225	3.28671	4.55402	3.3955	1.80284	0.00518009	Ribosomal RNA small subunit methyltransferase G (AHRD V3.3 *** A0A0B0NU00_GOSAR)
Solyc12g010320.2	SL3.0ch12	3380417	3380671	LastExon	LastExon	UTR3	1.63164	1.66861	1.4999	0.953258	0.950779	0.971628	1.66923	0.00567067	temperature-induced lipocalin
Solyc12g010950.2	SL3.0ch12	3827654	3827934	LastExon	UTR3	Intergenic	3.48042	3.28176	3.06772	1.91492	1.90748	1.54772	1.83048	0.00094264	NADP-dependent alkenal double bond reductase (AHRD V3.3 *** A0A072TLD5_MEDTR)
Solyc12g011160.2	SL3.0ch12	4012661	4012966	LastIntron	LastExon	UTR3	5.82366	5.66583	6.53549	3.4107	3.1218	3.0915	1.87292	0.00423894	3-hydroxyisobutyryl-CoA hydrolase-like protein (AHRD V3.3 *** A0A072V5U1_MEDTR)
Solyc12g013790.2	SL3.0ch12	4588285	4588513	UTR3	UTR3	UTR3	6.55795	6.48986	8.52092	2.59189	2.83933	2.5828	2.69138	0.0196954	Nucleic acid binding protein, putative (AHRD V3.3 *-* B9SNN8_RICCO)
Solyc12g013950.2	SL3.0ch12	4775499	4775766	LastIntron	UTR3	UTR3	8.21755	7.01033	8.61878	5.46556	5.34334	4.73814	1.53384	0.0160741	Sec1 family domain-containing protein 2 (AHRD V3.3 *** W9RNR0_9ROSA)
Solyc12g014190.2	SL3.0ch12	5033788	5034398	Exon11	UTR3	UTR3	17.5977	14.5865	17.7351	10.4129	10.6449	9.48941	1.63417	0.0161994	tRNA isopentenyltransferase (AHRD V3.3 *** A0A103Y4A0_CYNCS)
Solyc12g014280.2	SL3.0ch12	5099103	5099412	LastExon	LastExon	UTR3	8.09417	6.57244	7.7858	4.95053	4.76236	4.15459	1.61907	0.0120122	CRS1/YhbY (CRM) domain protein (AHRD V3.3 *** A0A072UMR2_MEDTR)
Solyc12g017230.2	SL3.0ch12	6427497	6427760	UTR3	Intergenic	Intergenic	2.93506	2.60387	3.01662	1.59086	1.75539	1.5656	1.74182	0.0038941	modifier of snc1 (AHRD V3.3 --* AT4G24680.5)
Solyc12g017240.2	SL3.0ch12	6427497	6427760	Intergenic	Intergenic	Exon1	2.93506	2.60387	3.01662	1.59086	1.75539	1.5656	1.74182	0.0038941	xyloglucan endo-transglycosylase B1
Solyc12g017250.2	SL3.0ch12	6440878	6441122	LastIntron	LastExon	UTR3	3.23406	2.95597	3.51831	2.05012	2.63929	1.71999	1.5147	0.034129	Photosystem II 10 kDa polypeptide family protein (AHRD V3.3 *** A9PH94_POPTR)
Solyc12g017250.2	SL3.0ch12	6438623	6438894	Intron2	Intron3	Exon4	3.04972	2.60999	2.96258	1.34915	1.55099	1.19235	2.10686	0.00116969	Photosystem II 10 kDa polypeptide family protein (AHRD V3.3 *** A9PH94_POPTR)
Solyc12g017420.2	SL3.0ch12	6691547	6691820	UTR3	UTR3	UTR3	12.9363	11.0308	12.7987	6.1264	6.5148	5.54989	2.02109	0.00358646	ABC transporter family protein (AHRD V3.3 *** AT1G54350.1)
Solyc12g017430.2	SL3.0ch12	6691547	6691820	Exon2	UTR3	UTR3	12.9363	11.0308	12.7987	6.1264	6.5148	5.54989	2.02109	0.00358646	ENTH/ANTH/VHS superfamily protein (AHRD V3.3 *-* AT2G01600.1)
Solyc12g018990.2	SL3.0ch12	8934956	8935387	LastExon	LastExon	UTR3	9.47321	7.74295	10.2494	5.20172	5.56326	4.63695	1.78326	0.0219767	Inosine-uridine preferring nucleoside hydrolase family protein (AHRD V3.3 *** B9HGC2_POPTR)
Solyc12g019010.2	SL3.0ch12	8972251	8972579	LastExon	UTR3	UTR3	12.6283	8.48336	12.0628	5.78451	6.37664	5.2961	1.90032	0.0494271	2-phytyl-1,4-beta-naphthoquinone methyltransferase, chloroplastic (AHRD V3.3 *** K4DDC9_SOLLC)
Solyc12g019470.2	SL3.0ch12	10403189	10403590	LastExon	UTR3	UTR3	5.00134	4.73803	5.20552	2.97648	3.46075	3.02269	1.57981	0.000947883	Nonsense-mediated mRNA decay protein 2 isoform 2 (AHRD V3.3 *** A0A061EJP7_THECC)
Solyc12g021130.2	SL3.0ch12	14349933	14350516	LastExon	LastExon	UTR3	15.8969	13.0422	16.4158	9.32465	10.7402	8.04662	1.61339	0.0139678	Reticulon-like protein (AHRD V3.3 *** K4DDN2_SOLLC)
Solyc12g021340.2	SL3.0ch12	15673622	15674097	Exon10	UTR3	UTR3	13.1734	9.68288	13.3415	7.659	7.7183	6.43503	1.65951	0.0443173	Rhodanese/Cell cycle control phosphatase superfamily protein (AHRD V3.3 *** AT4G24750.1)
Solyc12g035360.2	SL3.0ch12	39918072	39918804	Exon10	Exon10	Intergenic	20.5316	16.2859	20.6598	10.5572	10.8483	9.01532	1.88941	0.0145775	Transducin/WD40 repeat-like superfamily protein (AHRD V3.3 *** AT5G14530.1)
Solyc12g038970.2	SL3.0ch12	52525079	52525581	LastIntron	UTR3	UTR3	14.8985	12.3706	15.6678	8.76704	9.11995	7.8877	1.66586	0.0190873	EMB1873 protein (AHRD V3.3 *** A0A097PRP8_SOLLC)
Solyc12g042770.2	SL3.0ch12	59130071	59130505	LastExon	UTR3	Intergenic	5.69132	4.63636	5.51559	3.61622	2.98168	3.01384	1.64832	0.00920041	post-illumination chlorophyll fluorescence increase (AHRD V3.3 *** AT3G15840.1)
Solyc12g042920.2	SL3.0ch12	59309333	59309735	LastIntron	LastExon	UTR3	17.0115	13.7433	18.2998	10.775	11.0426	9.49215	1.56675	0.0369069	Cytochrome c1, heme protein (AHRD V3.3 *** G7KN99_MEDTR)
Solyc12g043090.2	SL3.0ch12	59689401	59689622	Intron4	Intron4	Intron4	8.26178	7.30581	7.86447	3.97864	4.50892	3.96605	1.88155	0.000845236	Transcription factor, putative (AHRD V3.3 *-* B9SQC7_RICCO)
Solyc12g044230.2	SL3.0ch12	60073743	60074042	LastIntron	LastExon	UTR3	4.97359	3.94699	4.64767	2.43675	2.14782	2.26946	1.9796	0.0129063	Sulfite exporter TauE/SafE family protein (AHRD V3.3 *** AT2G25737.1)
Solyc12g044600.3	SL3.0ch12	60579819	60580215	LastExon	LastExon	UTR3	5.8686	4.41376	6.03373	2.79622	2.79539	2.42793	2.03454	0.0275181	NADP-malic enzyme
Solyc12g044860.2	SL3.0ch12	61142596	61143020	LastIntron	UTR3	UTR3	8.07193	6.53269	8.83063	4.99665	5.11827	4.47764	1.60597	0.0399187	ethylene-responsive RNA helicase
Solyc12g049560.2	SL3.0ch12	62140596	62140871	LastIntron	UTR3	UTR3	11.0962	10.2115	10.4178	6.85057	7.52214	6.14457	1.54629	0.00248113	Ethylene-responsive transcription factor (AHRD V3.3 *** I6MBV0_JATCU)
Solyc12g049570.2	SL3.0ch12	62156994	62157303	Exon6	Intron6	Intron6	4.98455	3.91568	5.03225	3.26836	3.34601	2.41322	1.54332	0.0272091	ARID/BRIGHT DNA-binding domain-containing protein (AHRD V3.3 *** AT3G43240.1)
Solyc12g049580.2	SL3.0ch12	62156994	62157303	LastExon	UTR3	UTR3	4.98455	3.91568	5.03225	3.26836	3.34601	2.41322	1.54332	0.0272091	translation initiation factor eIF-2B subunit alpha (AHRD V3.3 *** AT1G53880.1)
Solyc12g055720.2	SL3.0ch12	62635736	62636087	Intron15	UTR3	LastIntron	8.61864	8.14642	9.10619	5.31488	5.35718	4.56874	1.6975	0.000737432	Ovule receptor-like kinase 28 (AHRD V3.3 *** A4GWX5_SOLCH)
Solyc12g056110.2	SL3.0ch12	63033701	63034151	LastIntron	LastExon	UTR3	18.6079	14.3705	20.0738	11.7415	11.0085	10.016	1.61912	0.0489303	V-type proton ATPase subunit E (AHRD V3.3 *** VATE_CITLI)
Solyc12g056130.2	SL3.0ch12	63042296	63042569	LastExon	UTR3	UTR3	6.73847	6.84917	7.93891	3.637	3.92276	2.7154	2.09501	0.00210376	BTB/POZ domain-containing family protein (AHRD V3.3 *** B9I8T4_POPTR)
Solyc12g056340.2	SL3.0ch12	63254384	63254615	LastExon	LastExon	UTR3	8.20093	5.97943	7.68736	4.03604	4.80241	3.38993	1.78828	0.0219838	RNA helicase DEAD38
Solyc12g056440.2	SL3.0ch12	63324548	63324933	LastExon	LastExon	UTR3	3.88294	3.42047	3.67769	2.17532	2.31817	1.94281	1.70612	0.00111042	SPX domain-containing family protein (AHRD V3.3 *** B9GW54_POPTR)
Solyc12g056520.2	SL3.0ch12	63414379	63414732	LastExon	UTR3	UTR3	15.9835	11.1909	15.2841	7.10298	8.01194	6.4937	1.96489	0.0345931	Exocyst complex component, putative (AHRD V3.3 *-* B9T2G4_RICCO)
Solyc12g056650.2	SL3.0ch12	63578697	63579123	LastExon	UTR3	Intergenic	3.35288	2.91232	3.72525	2.26489	2.11463	2.17906	1.52327	0.0359118	GIGANTEA (AHRD V3.3 *** F2Z6M2_IPONI)
Solyc12g070113.1	SL3.0ch12	29624875	29625167	LastExon	Intergenic	Intergenic	5.07416	5.49206	4.61061	2.00172	2.42777	1.54589	2.53989	0.00104179	CTP synthase (AHRD V3.3 *-* K4BA89_SOLLC)
Solyc12g076320.2	SL3.0ch12	22274086	22274480	LastExon	LastExon	UTR3	21.1617	16.1299	20.1737	9.669	10.3623	10.037	1.91116	0.0256149	Pachytene checkpoint protein 2 like (AHRD V3.3 *-* A0A0B2QCF2_GLYSO)
Solyc12g089340.2	SL3.0ch12	65447683	65448230	LastExon	UTR3	UTR3	10.4942	8.45094	11.1355	6.48111	6.29276	5.83842	1.61617	0.0361051	Vacuolar protein sorting-associated protein 35 (AHRD V3.3 *** K4DH05_SOLLC)
Solyc12g095820.2	SL3.0ch12	65925210	65925587	LastExon	LastExon	Intergenic	4.69471	3.47622	4.88796	2.44258	2.59649	2.22537	1.79765	0.0419447	Thioredoxin-related transmembrane protein 2 (AHRD V3.3 *** A0A151QPU7_CAJCA)
Solyc12g096040.2	SL3.0ch12	66092862	66093339	LastExon	Intergenic	Intergenic	9.47957	8.37793	9.31419	5.95267	5.87746	5.03092	1.61151	0.00176082	PHD finger alfin-like protein (AHRD V3.3 *** A0A072V846_MEDTR)
Solyc12g096550.2	SL3.0ch12	66399725	66399985	LastExon	UTR3	UTR3	3.49336	3.01457	3.60549	2.43766	2.11157	1.94692	1.55683	0.00741447	Pheophorbide a oxygenase (AHRD V3.3 *** A0A103XQM0_CYNCS)
Solyc12g098330.2	SL3.0ch12	66861813	66862206	LastIntron	LastExon	UTR3	7.031	6.46112	7.29951	4.77037	4.77889	4.22764	1.50917	0.00222157	60S ribosomal protein L13a-like protein (AHRD V3.3 *** Q3HRW1_SOLTU)
Solyc12g098810.2	SL3.0ch12	67170842	67171113	LastExon	LastExon	UTR3	2.93417	3.19186	2.79471	1.99522	2.19913	1.64804	1.5269	0.00855551	Chitinase family protein (AHRD V3.3 *** AT1G05850.2)
Solyc12g099110.2	SL3.0ch12	67367071	67367465	LastIntron	LastExon	UTR3	21.0516	15.3014	21.5666	11.3141	9.7125	9.187	1.91701	0.0343315	30S ribosomal protein S1
Solyc12g099250.2	SL3.0ch12	67429146	67429465	UTR3	UTR3	UTR3	3.7295	3.4157	3.60845	2.42354	2.22643	2.27413	1.55308	0.000688877	MAP kinase kinase kinase 89
Solyc12g099280.2	SL3.0ch12	67464990	67465218	Exon8	Exon8	UTR3	6.76083	6.5117	6.80145	3.74079	3.90021	2.5675	1.9664	0.0128957	Pre-mRNA polyadenylation factor Fip1 (AHRD V3.3 *-* A0A103XT69_CYNCS)
Solyc12g099310.2	SL3.0ch12	67478000	67478319	LastExon	UTR3	UTR3	2.80635	2.54986	3.13649	1.74859	1.64766	1.55364	1.71573	0.0131173	Ubiquitin-conjugating enzyme family protein (AHRD V3.3 *** B9HIP6_POPTR)
Solyc12g099420.2	SL3.0ch12	67561424	67561889	LastExon	LastExon	UTR3	9.54115	8.16126	9.7305	6.00384	5.7033	5.90748	1.55739	0.0194217	condensin-2 complex subunit H2-like protein (AHRD V3.3 *** AT3G16730.1)
Solyc12g099430.2	SL3.0ch12	67568182	67568585	Exon4	Intron4	LastIntron	2.92606	2.55703	2.83762	1.4275	1.63326	1.20466	1.95073	0.00130991	Epoxide hydrolase (AHRD V3.3 *** A0A072UTA2_MEDTR)

## Sheet: Table S9
Table S9. Transcripts with lower m6A peak enrichment in Cnr mutant fruit at 42 DPA compared to wild-type fruit at 42 DPA. WT, wild-type; DPA, days post-anthesis.
Overlapped gene ID	Chromosome	Peak Start	Peak End	Overlap_Begin	Overlap_Center	Overlap_End	m6A enrichment in peaks						Fold change in m6A enrichment (Cnr/WT)	P value	Gene descriptions
							Cnr-42DPA Replicate1	Cnr-42DPA Replicate 2	Cnr-42DPA Replicate 3	WT-42DPA Replicate 1	WT-42DPA Replicate 2	WT-42DPA Replicate 3
Solyc01g005270.3	SL3.0ch01	199962	200257	LastExon	UTR3	UTR3	9.37792	7.83786	9.26498	13.8672	15.99	11.4842	0.640539	0.0484709	Sec14p-like phosphatidylinositol transfer family protein (AHRD V3.3 *** AT1G14820.3)
Solyc01g005470.3	SL3.0ch01	322677	322897	LastExon	UTR3	UTR3	1.99168	2.04669	1.79223	3.87147	4.03646	3.31624	0.519469	0.00824273	PLANT CADMIUM RESISTANCE 2 (AHRD V3.3 *** AT1G14870.1)
Solyc01g008850.3	SL3.0ch01	2817888	2818133	LastIntron	LastExon	UTR3	0.930243	0.925443	0.886985	2.00021	1.95162	1.59016	0.494889	0.0177809	Non-specific serine/threonine protein kinase (AHRD V3.3 *** A0A0V0IV59_SOLCH)
Solyc01g068150.3	SL3.0ch01	77062696	77063097	LastExon	UTR3	Intergenic	4.93059	4.2465	5.46317	7.17336	8.87826	6.7629	0.641708	0.0327378	NEFA-interacting nuclear protein NIP30, putative (AHRD V3.3 *** B9RN44_RICCO)
Solyc01g081540.3	SL3.0ch01	80588452	80588669	Exon14	Exon14	Intron14	0.846211	1.25847	0.743123	1.4258	1.59595	1.75389	0.596319	0.0343436	Myosin family protein, putative, expressed (AHRD V3.3 *** Q10CX1_ORYSJ)
Solyc01g091270.3	SL3.0ch01	84803453	84803807	Intron1	Exon2	Intron3	0.885543	1.11015	0.743544	1.61559	1.5417	1.50147	0.587977	0.0191679	Myeloid leukemia factor 1 (AHRD V3.3 *** A0A0B0Q047_GOSAR)
Solyc01g094820.3	SL3.0ch01	86102134	86102335	LastExon	UTR3	UTR3	3.28534	3.14723	3.25839	5.31516	6.16433	6.1111	0.550918	0.00941285	ARID/BRIGHT DNA-binding domain-containing protein (AHRD V3.3 *** A0A103XI63_CYNCS)
Solyc01g096080.3	SL3.0ch01	87069004	87069277	Exon2	Exon2	UTR3	2.79239	3.05027	2.54606	4.18835	5.17278	3.90618	0.632284	0.0381619	30S ribosomal protein S16, chloroplastic (AHRD V3.3 --* RR16_SACHY)
Solyc01g096090.3	SL3.0ch01	87069004	87069277	UTR3	UTR3	Intergenic	2.79239	3.05027	2.54606	4.18835	5.17278	3.90618	0.632284	0.0381619	Transmembrane protein, putative (AHRD V3.3 *** A0A072U5P8_MEDTR)
Solyc01g099400.3	SL3.0ch01	89551226	89551632	Intron3	Exon4	UTR3	2.65821	2.64687	2.70053	5.60449	6.33064	4.44464	0.48875	0.0364975	WD-repeat protein, putative (AHRD V3.3 *** B9T0U7_RICCO)
Solyc01g100970.3	SL3.0ch01	90729329	90729647	LastExon	LastExon	UTR3	1.10112	1.19394	1.15253	1.89418	2.15435	1.84396	0.585082	0.0094473	Pyrrolidone-carboxylate peptidase family protein (AHRD V3.3 *** A9PGH9_POPTR)
Solyc01g104720.3	SL3.0ch01	93012610	93012860	LastIntron	UTR3	Intergenic	1.37351	1.33721	1.41283	2.25033	2.45165	1.91975	0.622729	0.0308749	thionin-like protein (AHRD V3.3 -** AT1G25275.1)
Solyc01g106060.3	SL3.0ch01	93936853	93937136	Intron3	UTR3	UTR3	4.05009	3.94067	4.17678	6.57143	6.18434	5.59018	0.663227	0.0146671	Class I glutamine amidotransferase (AHRD V3.3 *** G7K286_MEDTR)
Solyc01g107857.1	SL3.0ch01	95144231	95145101	Exon2	Intergenic	Intergenic	2.12613	2.4798	2.04541	3.80635	4.03497	3.437	0.589746	0.00274993	Glycosyltransferase (AHRD V3.3 *** C1JIE1_9SOLA)
Solyc01g107860.3	SL3.0ch01	95144231	95145101	UTR3	Intergenic	Intergenic	2.12613	2.4798	2.04541	3.80635	4.03497	3.437	0.589746	0.00274993	CBS domain-containing family protein (AHRD V3.3 *** B9GHB5_POPTR)
Solyc01g108300.3	SL3.0ch01	95557905	95558240	LastExon	LastExon	UTR3	1.38756	1.35733	1.25079	2.73541	2.44529	2.17829	0.542966	0.0152608	Myb family transcription factor
Solyc01g109080.3	SL3.0ch01	96052798	96053577	UTR3	UTR3	UTR3	4.72715	4.0184	4.69058	7.84193	8.16127	6.50402	0.59697	0.0147951	Serine/threonine-protein kinase SMG1 (AHRD V3.3 *** A0A0B2PF15_GLYSO)
Solyc01g109085.1	SL3.0ch01	96052798	96053577	UTR5	Exon1	LastIntron	4.72715	4.0184	4.69058	7.84193	8.16127	6.50402	0.59697	0.0147951	phragmoplast orienting kinesin 1 (AHRD V3.3 --* AT3G17360.3)
Solyc01g111370.3	SL3.0ch01	97555715	97556045	Intergenic	UTR5	Exon1	0.79778	1.13874	0.770848	1.44885	1.39709	1.29962	0.653077	0.0427338	Choline transporter-related family protein (AHRD V3.3 *** B9HR78_POPTR)
Solyc02g031830.1	SL3.0ch02	27533207	27533442	LastExon	Intergenic	Intergenic	1.03273	1.05088	0.95965	1.53404	1.78135	1.57916	0.621764	0.00831373	polyadenylate-binding protein 1-B-binding protein (AHRD V3.3 *** AT4G19950.1)
Solyc02g031950.3	SL3.0ch02	27689857	27690053	UTR5	UTR5	Intron1	0.612506	1.00362	0.66634	1.24197	1.40752	1.28559	0.58003	0.0320905	pathogenesis-related family protein (AHRD V3.3 *** AT1G78780.5)
Solyc02g062490.3	SL3.0ch02	34709656	34709913	LastExon	LastExon	UTR3	3.64231	3.0398	4.54492	12.3938	8.92235	8.11874	0.381419	0.0331976	2-oxoglutarate-dependent dioxygenase-related family protein (AHRD V3.3 *** B9GL08_POPTR)
Solyc02g079277.1	SL3.0ch02	44435605	44436006	Exon2	Intergenic	Intergenic	17.2643	12.9665	21.7344	31.3534	36.6124	32.6886	0.516274	0.00908918	Inositol monophosphatase family protein (AHRD V3.3 --* AT4G05090.2)
Solyc02g080540.1	SL3.0ch02	45303953	45304172	LastExon	Intergenic	Intergenic	1.09325	1.31715	0.839533	1.71324	1.81739	1.68272	0.623389	0.0331178	ATP synthase gamma-subunit (AHRD V3.3 *** I0ZA63_COCSC)
Solyc02g082435.1	SL3.0ch02	46682001	46682618	LastIntron	UTR3	UTR3	1.68272	1.70682	1.594	5.57875	6.71829	5.21849	0.284521	0.0111578	DNA mismatch repair protein mutL (AHRD V3.3 *-* A0A0B2SBZ1_GLYSO)
Solyc02g085860.3	SL3.0ch02	49279137	49279593	UTR3	LastIntron	LastIntron	2.05841	1.84506	2.03763	3.79504	3.62421	3.45712	0.546239	0.000313643	ALG6, ALG8 glycosyltransferase family protein (AHRD V3.3 *** A0A072U6Q6_MEDTR)
Solyc02g086460.3	SL3.0ch02	49765034	49765394	Exon3	Exon3	Exon3	0.804553	0.80521	0.542762	1.39726	1.228	1.6702	0.501117	0.0136164	A-kinase anchor-like protein (AHRD V3.3 --* AT5G40450.2)
Solyc02g086460.3	SL3.0ch02	49770457	49770703	Exon13	Exon13	Exon13	1.11226	1.39962	0.889722	1.71962	1.6584	1.99128	0.633528	0.0265317	A-kinase anchor-like protein (AHRD V3.3 --* AT5G40450.2)
Solyc02g086460.3	SL3.0ch02	49771942	49772313	Exon16	Exon16	Exon16	0.846945	1.0714	0.716302	1.48173	1.40217	1.79913	0.562594	0.0135271	A-kinase anchor-like protein (AHRD V3.3 --* AT5G40450.2)
Solyc02g086463.1	SL3.0ch02	49765034	49765394	Intron20	Intron21	Exon22	0.804553	0.80521	0.542762	1.39726	1.228	1.6702	0.501117	0.0136164	ARM repeat superfamily protein (AHRD V3.3 --* AT3G54790.3)
Solyc02g086463.1	SL3.0ch02	49770457	49770703	Intron1	Exon3	Exon3	1.11226	1.39962	0.889722	1.71962	1.6584	1.99128	0.633528	0.0265317	ARM repeat superfamily protein (AHRD V3.3 --* AT3G54790.3)
Solyc02g086467.1	SL3.0ch02	49771942	49772313	Intron19	Exon20	Intron20	0.846945	1.0714	0.716302	1.48173	1.40217	1.79913	0.562594	0.0135271	Histone H4 (AHRD V3.3 --* A0A0D3DSU9_BRAOL)
Solyc02g086880.3	SL3.0ch02	50126660	50127101	LastIntron	Intergenic	Intergenic	2.11085	2.02499	2.24571	4.24884	4.52749	3.67852	0.512375	0.0109839	formate dehydrogenase
Solyc02g086960.2	SL3.0ch02	50173185	50173447	UTR3	Intergenic	Intergenic	3.02746	2.47219	2.90607	6.00195	6.88039	4.92924	0.471925	0.0233048	LOW QUALITY:Serine-threonine protein kinase, putative (AHRD V3.3 *** A0A061ED60_THECC)
Solyc02g086970.3	SL3.0ch02	50173185	50173447	LastExon	UTR3	UTR3	3.02746	2.47219	2.90607	6.00195	6.88039	4.92924	0.471925	0.0233048	Aldehyde dehydrogenase (AHRD V3.3 *** Q1AFF6_VITPS)
Solyc02g089160.3	SL3.0ch02	51684080	51684315	LastExon	LastExon	UTR3	1.00885	1.16354	1.08671	1.99583	2.03403	1.70971	0.56783	0.00693465	dwarf
Solyc02g089390.2	SL3.0ch02	51867587	51867939	UTR3	UTR3	UTR3	1.68692	1.73466	1.53087	2.87608	3.06781	2.52614	0.584703	0.00988651	Cell morphogenesis related protein (AHRD V3.3 *** F4KB73_ARATH)
Solyc02g089400.3	SL3.0ch02	51867587	51867939	UTR3	UTR3	UTR3	1.68692	1.73466	1.53087	2.87608	3.06781	2.52614	0.584703	0.00988651	Amino acid transporter, putative (AHRD V3.3 *** B9T738_RICCO)
Solyc02g090740.3	SL3.0ch02	52897330	52897670	Intergenic	Intron1	Intron1	1.85454	1.36984	1.7101	4.93706	5.72759	4.42499	0.327012	0.00632601	Protein DETOXIFICATION (AHRD V3.3 *** K4BCM3_SOLLC)
Solyc02g090750.3	SL3.0ch02	52897330	52897670	LastExon	Intergenic	Intergenic	1.85454	1.36984	1.7101	4.93706	5.72759	4.42499	0.327012	0.00632601	Eukaryotic initiation factor 4A (ATP-dependent RNA helicase eIF4A) (AHRD V3.3 *-* E1ZM95_CHLVA)
Solyc02g092860.3	SL3.0ch02	54465111	54465352	UTR3	UTR3	UTR3	3.65117	3.19163	3.8375	5.66774	6.36191	5.21528	0.61933	0.00906891	Cytochrome P450, putative (AHRD V3.3 *** B9R747_RICCO)
Solyc02g092870.2	SL3.0ch02	54465111	54465352	UTR3	UTR3	UTR3	3.65117	3.19163	3.8375	5.66774	6.36191	5.21528	0.61933	0.00906891	nucleolar protein gar2-like protein (AHRD V3.3 *** AT2G42320.2)
Solyc03g007050.3	SL3.0ch03	1619770	1620039	UTR3	UTR3	UTR3	4.43731	4.74175	4.09272	11.5931	14.4791	10.3352	0.364535	0.0222838	ERECTA-like 1 (AHRD V3.3 *** AT5G62230.1)
Solyc03g007060.3	SL3.0ch03	1619770	1620039	UTR3	UTR3	UTR3	4.43731	4.74175	4.09272	11.5931	14.4791	10.3352	0.364535	0.0222838	Cell cycle regulated microtubule-associated protein (AHRD V3.3 *** A0A072UNM9_MEDTR)
Solyc03g026170.3	SL3.0ch03	3605816	3606169	LastExon	LastExon	Intergenic	1.55656	1.72554	1.41868	4.30968	4.55516	3.39433	0.38345	0.0146956	F-box protein (AHRD V3.3 *** A0A0B2QYU7_GLYSO)
Solyc03g044740.3	SL3.0ch03	10473915	10474218	LastExon	LastExon	UTR3	2.07787	2.01204	2.13995	5.26738	5.49186	4.11634	0.418798	0.0205106	Methyl esterase 10, putative (AHRD V3.3 *** A0A061DG36_THECC)
Solyc03g096900.3	SL3.0ch03	60698646	60698916	UTR3	UTR3	UTR3	6.2858	4.76019	6.04529	9.18208	9.4333	9.5558	0.606694	0.012578	Guanosine-3',5'-bis(Diphosphate) 3'-pyrophosphohydrolase isoform 3 (AHRD V3.3 *** A0A061F675_THECC)
Solyc03g097020.3	SL3.0ch03	60811682	60811941	Intron3	Exon4	Exon4	1.66882	2.52893	1.16485	3.0909	3.60358	3.04103	0.550829	0.0497069	AAA-type ATPase family protein
Solyc03g112330.3	SL3.0ch03	64248288	64248627	LastExon	LastExon	UTR3	4.01814	3.47018	4.16362	8.07009	7.36228	6.60615	0.528708	0.00562338	U-box domain-containing protein kinase family protein (AHRD V3.3 *-* AT2G19410.2)
Solyc03g114920.1	SL3.0ch03	66266322	66266584	LastExon	UTR3	Intergenic	1.20741	1.47168	0.958519	2.29611	2.6545	1.97989	0.524869	0.0128181	Pentatricopeptide repeat (PPR) superfamily protein (AHRD V3.3 *** AT5G60960.1)
Solyc03g115235.1	SL3.0ch03	66502442	66502822	Intron1	Intron1	Exon2	6.21927	5.36689	6.5756	9.5412	9.6706	8.79996	0.648362	0.002455	Acetyl-coenzyme A carboxylase carboxyl transferase subunit beta, chloroplastic (AHRD V3.3 --* A0A0S2GM58_DENCH)
Solyc03g116460.3	SL3.0ch03	67364033	67364335	UTR3	Intergenic	Intergenic	0.65221	0.78727	0.691968	1.66863	2.03608	1.60053	0.401762	0.0108635	Aspartate racemase (AHRD V3.3 *** A0A0B2QLV5_GLYSO)
Solyc03g118340.3	SL3.0ch03	68729790	68730147	UTR3	UTR3	UTR3	0.868886	0.768576	0.952287	2.05481	1.75664	1.93326	0.450806	0.00122115	Chloroplast ATP-dependent Clp protease chaperone protein (AHRD V3.3 *** A0A088FCE7_NICBE)
Solyc03g120630.3	SL3.0ch03	70458980	70459264	UTR3	UTR3	Intergenic	3.12768	3.14257	3.22603	5.80523	6.147	4.64305	0.572228	0.0345552	ribosomal protein S17 (AHRD V3.3 *** AT1G79850.1)
Solyc03g121540.3	SL3.0ch03	71124117	71124361	UTR3	UTR3	Intergenic	0.951791	1.07444	0.856617	2.11062	2.25069	1.57347	0.485755	0.0300395	beta-galactosidase 3
Solyc03g123790.3	SL3.0ch03	72019633	72019991	LastExon	Intergenic	Intergenic	1.44837	1.55308	1.43991	3.49503	3.58425	2.80856	0.449174	0.0160763	vacuolar cation/proton exchanger (AHRD V3.3 *** AT1G55720.2)
Solyc04g008240.3	SL3.0ch04	1924717	1925050	LastExon	LastExon	UTR3	1.84091	1.90407	1.57433	2.51246	2.7808	2.69984	0.665488	0.00276777	Oxidoreductase, 2OG-Fe(II) oxygenase family protein (AHRD V3.3 *** A0A0K9PBA8_ZOSMR)
Solyc04g008630.3	SL3.0ch04	2242324	2242655	LastExon	UTR3	UTR3	2.51221	2.33919	2.20272	3.70962	3.63372	3.3517	0.65957	0.00117642	Autophagy-related protein 9 (AHRD V3.3 *** A0A0K0XR24_TOBAC)
Solyc04g008680.3	SL3.0ch04	2331677	2331931	Exon18	Exon18	Intron18	1.00721	1.2718	0.941137	1.88739	2.1514	1.99197	0.533954	0.00234217	DBC1/CARP1-like protein (AHRD V3.3 *** A0A103XRU5_CYNCS)
Solyc04g008970.3	SL3.0ch04	2567236	2567513	UTR3	UTR3	UTR3	0.976466	1.12118	0.916738	1.8603	2.10848	1.76055	0.526131	0.00371299	GRAM domain-containing protein / ABA-responsive protein-related (AHRD V3.3 *** A0A061E267_THECC)
Solyc04g008980.3	SL3.0ch04	2567236	2567513	UTR3	UTR3	UTR3	0.976466	1.12118	0.916738	1.8603	2.10848	1.76055	0.526131	0.00371299	F-box/LRR protein (AHRD V3.3 *** I3SW78_MEDTR)
Solyc04g009800.3	SL3.0ch04	3113679	3113963	Exon1	Exon1	Exon1	0.758171	1.08795	0.68328	1.37147	1.3399	1.19787	0.647032	0.0493686	Calcium dependent protein kinase (AHRD V3.3 *** E1CFU1_SOLLC)
Solyc04g014870.3	SL3.0ch04	5130352	5130609	UTR3	UTR3	UTR3	1.43571	1.35532	1.07982	2.13941	2.63614	2.03292	0.568535	0.0171091	RNA-dependent RNA polymerase6a
Solyc04g024940.3	SL3.0ch04	27320380	27320769	LastExon	UTR3	Intergenic	5.28857	4.18392	5.59844	7.99753	7.42308	7.30138	0.663275	0.013684	F-box family protein
Solyc04g049840.3	SL3.0ch04	43577140	43577428	LastExon	UTR3	UTR3	6.92816	6.45588	8.02337	15.3284	16.4175	13.3176	0.475051	0.00461072	CCR4-NOT transcription complex subunit 4 (AHRD V3.3 *-* A0A0B0N9G8_GOSAR)
Solyc04g054490.3	SL3.0ch04	52556799	52557050	UTR3	UTR3	UTR3	2.35542	2.05026	2.46371	3.8072	6.07094	5.40486	0.449479	0.048696	Eukaryotic aspartyl protease family protein (AHRD V3.3 *** A0A061DI57_THECC)
Solyc04g058180.3	SL3.0ch04	55201915	55202159	LastExon	UTR3	UTR3	2.66986	3.13737	4.04871	5.20236	5.50881	4.77551	0.636414	0.0257575	S-adenosyl-L-methionine-dependent methyltransferases superfamily protein (AHRD V3.3 *** AT1G77260.1)
Solyc04g074480.3	SL3.0ch04	60557523	60557776	LastExon	LastExon	UTR3	0.887333	0.717535	0.817122	1.69375	2.07073	1.50582	0.459554	0.0219719	DAHP synthase 2 precursor
Solyc04g078600.3	SL3.0ch04	63373582	63374324	UTR3	UTR3	UTR3	0.927775	1.43295	0.905798	1.99869	1.74026	2.08851	0.560539	0.0198796	50S ribosomal protein L4 (AHRD V3.3 *** A0A1D1XFF1_9ARAE)
Solyc04g078610.3	SL3.0ch04	63373582	63374324	Intron14	Intron16	Exon18	0.927775	1.43295	0.905798	1.99869	1.74026	2.08851	0.560539	0.0198796	Kinesin-like protein (AHRD V3.3 *** A0A0V0IYA4_SOLCH)
Solyc04g080600.3	SL3.0ch04	64805910	64806249	LastIntron	LastExon	UTR3	24.2146	18.1014	24.3614	31.667	46.0924	39.9528	0.566445	0.0371278	DnaJ domain-containing protein (AHRD V3.3 *-* A0A103XYN8_CYNCS)
Solyc05g005460.3	SL3.0ch05	346799	347284	LastExon	LastExon	UTR3	2.35268	2.48214	2.43455	4.66418	4.36323	3.84787	0.564599	0.0141279	Cysteine/Histidine-rich C1 domain family protein (AHRD V3.3 --* AT2G44370.1)
Solyc05g006730.3	SL3.0ch05	1380665	1380952	Exon4	Intron4	Intron4	1.02602	1.12078	0.620109	2.38563	3.11428	2.27244	0.355994	0.0100118	Glutathione S-transferase family protein (AHRD V3.3 *-* AT1G10370.1)
Solyc05g006740.3	SL3.0ch05	1380665	1380952	LastExon	LastExon	UTR3	1.02602	1.12078	0.620109	2.38563	3.11428	2.27244	0.355994	0.0100118	Sl Glutathione S-transferase
Solyc05g009630.3	SL3.0ch05	3822414	3822665	LastIntron	Intergenic	Intergenic	2.8672	2.83943	3.22517	4.3895	5.5064	4.1836	0.634383	0.0431656	Disease resistance protein (AHRD V3.3 *** A0A103XDQ0_CYNCS)
Solyc05g010240.3	SL3.0ch05	4421858	4422107	UTR3	UTR3	UTR3	0.809202	1.04159	0.635788	1.42465	1.51034	1.2515	0.593955	0.0210736	Chaperonin-60 beta subunit (AHRD V3.3 *** P93570_SOLTU)
Solyc05g010245.1	SL3.0ch05	4421858	4422107	LastExon	Intergenic	Intergenic	0.809202	1.04159	0.635788	1.42465	1.51034	1.2515	0.593955	0.0210736	Chaperonin-60 beta subunit (AHRD V3.3 *-* P93570_SOLTU)
Solyc05g010250.2	SL3.0ch05	4421858	4422107	UTR5	Exon1	Exon1	0.809202	1.04159	0.635788	1.42465	1.51034	1.2515	0.593955	0.0210736	N-acetyltransferase, putative (AHRD V3.3 *** B9RLC7_RICCO)
Solyc05g010290.2	SL3.0ch05	4454266	4454517	LastExon	Intergenic	Intergenic	3.71563	3.46263	3.56219	5.77187	5.73554	4.74647	0.660793	0.027212	trigger factor (AHRD V3.3 *** AT3G25545.1)
Solyc05g052220.3	SL3.0ch05	63356934	63357336	LastExon	LastExon	Intergenic	2.83894	2.76681	2.79874	6.18978	7.22487	5.98649	0.433196	0.0105917	U-box protein (AHRD V3.3 *-* A0A072V2F3_MEDTR)
Solyc05g053800.3	SL3.0ch05	64682639	64683154	Exon9	Intron10	Intron11	1.08467	1.44472	0.798366	1.77515	2.14957	1.75317	0.586091	0.0314856	DNA repair protein RAD50 (AHRD V3.3 *** RAD50_ARATH)
Solyc06g010170.3	SL3.0ch06	5287671	5287883	LastIntron	UTR3	UTR3	18.0673	12.633	20.3626	27.3558	25.9065	26.2569	0.642145	0.0492818	lysine ketoglutarate reductase trans-splicing protein (DUF707) (AHRD V3.3 *** AT1G67850.7)
Solyc06g018004.1	SL3.0ch06	16143272	16143577	LastIntron	LastIntron	LastIntron	1.88104	1.95053	1.66575	2.93551	3.348	2.98016	0.593428	0.00237143	tetraspanin10 (AHRD V3.3 --* AT1G63260.6)
Solyc06g053320.3	SL3.0ch06	36163680	36163911	LastIntron	UTR3	UTR3	13.3277	12.5834	13.6107	21.9892	19.4394	20.5817	0.63734	0.00405097	RNA-binding protein (AHRD V3.3 *** E5GC87_CUCME)
Solyc06g053360.3	SL3.0ch06	36204278	36204563	UTR3	UTR3	Intergenic	8.1418	7.38075	8.28724	13.3218	15.4295	11.4881	0.591703	0.0342974	ENHANCED DISEASE RESISTANCE-like protein (DUF1336) (AHRD V3.3 *** AT1G06050.1)
Solyc06g054010.3	SL3.0ch06	36971708	36972087	UTR3	UTR3	Intergenic	7.24475	6.34526	7.35135	16.1784	18.437	15.3758	0.418902	0.00461776	inositol-1,4,5-triphosphate-5-phosphatase 3
Solyc06g066330.3	SL3.0ch06	41735454	41735815	LastExon	LastExon	Intergenic	2.33218	1.7827	2.52052	3.48033	3.46172	3.26408	0.650139	0.0244983	Poly [ADP-ribose] polymerase (AHRD V3.3 *** A0A0V0IXP4_SOLCH)
Solyc06g068460.3	SL3.0ch06	42551724	42552047	LastExon	LastExon	LastExon	0.59114	0.95071	0.536193	1.26153	1.12617	1.41987	0.545768	0.0267978	WRKY transcription factor 40
Solyc06g068470.3	SL3.0ch06	42551724	42552047	LastIntron	LastIntron	LastIntron	0.59114	0.95071	0.536193	1.26153	1.12617	1.41987	0.545768	0.0267978	phospholipid N-methyltransferase (AHRD V3.3 *** AT1G80860.2)
Solyc06g082520.3	SL3.0ch06	48347312	48347553	UTR3	UTR3	UTR3	4.81809	4.14555	4.57141	7.55966	6.75586	6.49064	0.65053	0.00560159	B3 domain-containing protein (AHRD V3.3 *** W9SAB7_9ROSA)
Solyc06g083760.3	SL3.0ch06	49145875	49146218	LastExon	LastExon	UTR3	13.0438	10.0095	13.245	17.7882	21.1082	16.0355	0.660788	0.0318455	Histone-lysine N-methyltransferase (AHRD V3.3 *-* W9QWZ0_9ROSA)
Solyc07g007060.2	SL3.0ch07	1836597	1836859	LastExon	Intergenic	Intergenic	0.785184	1.01807	0.722712	1.82701	2.03761	1.57606	0.464275	0.00573702	Metal tolerance protein (AHRD V3.3 *** A7L8D2_CUCSA)
Solyc07g008560.3	SL3.0ch07	3507463	3507926	Exon12	Exon12	UTR3	2.52327	2.15007	2.43709	8.42692	9.27928	8.0288	0.276294	0.00177674	Purple acid phosphatase (AHRD V3.3 *** K4CBX4_SOLLC)
Solyc07g022860.3	SL3.0ch07	23020568	23020883	LastExon	LastExon	LastExon	1.91089	2.1381	1.42199	2.81352	2.87115	2.68402	0.653743	0.0374151	Regulator of Vps4 activity in the MVB pathway protein (AHRD V3.3 *** A0A072UBV7_MEDTR)
Solyc07g052453.1	SL3.0ch07	61093459	61093940	Intron6	Intron7	Intron8	0.651044	0.978456	0.670237	1.30995	1.17181	1.42092	0.589271	0.0182836	Syntaxin, putative (AHRD V3.3 *** B9SUS4_RICCO)
Solyc07g052470.3	SL3.0ch07	61093459	61093940	Intron4	Intron5	Intron6	0.651044	0.978456	0.670237	1.30995	1.17181	1.42092	0.589271	0.0182836	Syntaxin, putative (AHRD V3.3 *** B9SUS4_RICCO)
Solyc07g053640.1	SL3.0ch07	62220686	62221347	LastExon	LastExon	LastExon	1.09132	1.29614	0.997277	1.87726	2.0663	1.56193	0.614793	0.0218445	LOW QUALITY:Arabinogalactan-protein (AHRD V3.3 *-* Q41256_NICAL)
Solyc07g054290.1	SL3.0ch07	62768065	62768305	LastExon	LastExon	LastExon	0.687302	1.01421	0.747709	1.57883	1.80633	1.35904	0.516256	0.0109072	photosystem II family protein (AHRD V3.3 *** AT1G03600.1)
Solyc07g063100.3	SL3.0ch07	65803566	65803961	Exon4	Intron4	Intron5	0.571532	0.837471	0.563491	1.03221	0.928996	1.14961	0.634077	0.0310124	Proton pump interactor 1 (AHRD V3.3 *** D5L6G0_SOLTU)
Solyc07g063390.3	SL3.0ch07	65992977	65993318	LastExon	UTR3	UTR3	1.68295	1.53911	1.69878	3.87158	3.98099	3.44581	0.435535	0.00318546	Beta-glucosidase (AHRD V3.3 *** B4FQQ6_MAIZE)
Solyc07g064440.3	SL3.0ch07	66735075	66735445	LastExon	LastExon	UTR3	1.94141	1.85943	1.94025	3.04622	3.1329	2.56273	0.656737	0.0277038	inositol-1,4,5-trisphosphate 5-phosphatase (AHRD V3.3 *** AT4G27020.1)
Solyc07g066030.3	SL3.0ch07	67697136	67697463	LastIntron	UTR3	UTR3	5.24505	4.4161	5.33003	12.8046	15.578	12.8991	0.363144	0.00627332	Proteasome activator subunit 4 (AHRD V3.3 *** A0A142CD27_9LAMI)
Solyc08g045640.3	SL3.0ch08	17826647	17827031	LastExon	UTR3	UTR3	2.50368	2.12396	2.16281	4.26406	3.84526	3.88317	0.566225	0.000684716	Remorin family protein (AHRD V3.3 *** B9GJG3_POPTR)
Solyc08g075020.3	SL3.0ch08	59302286	59302601	LastExon	LastExon	UTR3	0.66669	0.724344	0.638466	2.41237	2.68055	2.06885	0.28338	0.00942861	Pectinacetylesterase family protein (AHRD V3.3 *** AT4G19420.2)
Solyc08g075400.3	SL3.0ch08	59663437	59663697	UTR3	UTR3	UTR3	2.14334	1.8883	2.17953	3.07946	3.48259	2.78699	0.664364	0.0210948	SWIb domain-containing protein (AHRD V3.3 *** Q6V9I4_SOLCH)
Solyc08g076320.3	SL3.0ch08	60407438	60407671	LastExon	UTR3	UTR3	1.17817	1.24643	1.24485	2.3407	1.86275	2.08479	0.583541	0.0217768	Cellulose synthase (AHRD V3.3 *** A0A118JX74_CYNCS)
Solyc08g078695.1	SL3.0ch08	62591186	62591437	LastExon	LastExon	LastExon	0.940518	1.09948	0.771873	1.54989	1.58862	1.40223	0.619253	0.0109161	Heat-shock protein, putative (AHRD V3.3 *** B9SSG1_RICCO)
Solyc08g079430.3	SL3.0ch08	63075265	63075512	LastExon	UTR3	UTR3	0.901547	1.12238	0.951544	1.87421	1.91176	1.46742	0.566391	0.019133	partialcopper-containing amine oxidase
Solyc08g081140.3	SL3.0ch08	64346073	64346351	Exon3	Exon3	UTR3	2.50162	3.01364	2.80544	5.09395	6.24734	4.88761	0.512709	0.0162671	bHLH transcription factor 090
Solyc08g082080.3	SL3.0ch08	65103403	65103925	LastExon	LastExon	Intergenic	1.40821	1.19882	1.35994	2.7261	2.606	2.07729	0.535398	0.0208307	Amino acid transporter family protein (AHRD V3.3 *** B9GL79_POPTR)
Solyc08g082990.3	SL3.0ch08	65734668	65734880	LastExon	LastExon	UTR3	0.941337	0.95078	0.779482	1.49481	1.66777	1.39719	0.585906	0.00415877	Oligopeptide transporter, putative (AHRD V3.3 *** B9RYS3_RICCO)
Solyc09g065550.3	SL3.0ch09	63925708	63926029	UTR3	UTR3	Intergenic	1.49829	1.50299	1.38901	2.98067	3.25153	2.56667	0.49896	0.015331	Kinase interacting (KIP1-like) family protein, putative (AHRD V3.3 *** A0A061DQM7_THECC)
Solyc09g065560.3	SL3.0ch09	63925708	63926029	Exon12	UTR3	UTR3	1.49829	1.50299	1.38901	2.98067	3.25153	2.56667	0.49896	0.015331	Sulfate transporter (AHRD V3.3 *** D7LTZ8_ARALL)
Solyc09g075830.3	SL3.0ch09	67893399	67893625	UTR3	UTR3	UTR3	1.12947	1.19774	1.05851	1.83104	1.75216	1.74339	0.635625	0.000372519	Protein TIME FOR COFFEE-like protein (AHRD V3.3 *** A0A0B0MVU7_GOSAR)
Solyc09g092430.3	SL3.0ch09	72007434	72007746	LastExon	LastExon	UTR3	3.4907	3.00481	3.45461	6.1375	6.20235	5.4856	0.558198	0.00123669	Selenium binding family protein (AHRD V3.3 *** B9GFI5_POPTR)
Solyc10g005120.2	SL3.0ch10	107946	108239	LastExon	LastExon	UTR3	0.250805	1.36984	1.36424	5.32312	5.14317	5.14766	0.191168	0.00662397	2-oxoglutarate (2OG) and Fe(II)-dependent oxygenase superfamily protein (AHRD V3.3 *** AT4G16330.2)
Solyc10g006215.1	SL3.0ch10	904067	904304	LastIntron	UTR3	UTR3	17.1062	12.3637	16.3709	26.907	28.0537	25.6446	0.568707	0.00677068	Cell differentiation protein RCD1 like (AHRD V3.3 *-* A0A0B2PXT8_GLYSO),Pfam:PF04078
Solyc10g006220.3	SL3.0ch10	904067	904304	LastIntron	UTR3	UTR3	17.1062	12.3637	16.3709	26.907	28.0537	25.6446	0.568707	0.00677068	Cell differentiation protein rcd1, putative (AHRD V3.3 *** B9STZ0_RICCO)
Solyc10g006860.3	SL3.0ch10	1288860	1289203	LastExon	LastExon	UTR3	1.12541	1.65083	1.22432	3.65623	3.71806	3.23366	0.377128	0.000586114	NAD(P)-binding Rossmann-fold superfamily protein (AHRD V3.3 *** AT2G17845.1)
Solyc10g008240.3	SL3.0ch10	2338973	2339211	UTR3	UTR3	UTR3	7.11619	6.42007	7.00199	17.2096	15.0372	14.9991	0.43471	0.00393354	Disease resistance protein (AHRD V3.3 *** A0A118JXS4_CYNCS)
Solyc10g009055.1	SL3.0ch10	3069029	3069437	LastExon	UTR3	Intergenic	1.25402	4.10952	4.09272	11.7461	11.7204	8.53389	0.295504	0.00647406	BED zinc finger,hAT family dimerization domain (AHRD V3.3 *** A0A061DK10_THECC)
Solyc10g009220.3	SL3.0ch10	3215083	3215446	UTR3	UTR3	UTR3	1.08348	1.27121	0.971339	1.80686	2.08607	1.52272	0.61415	0.0313777	RNA-binding (RRM/RBD/RNP motifs) family protein (AHRD V3.3 *** AT4G00830.6)
Solyc10g009230.1	SL3.0ch10	3215083	3215446	LastExon	LastExon	LastExon	1.08348	1.27121	0.971339	1.80686	2.08607	1.52272	0.61415	0.0313777	At2g46730/F19D11.1 (AHRD V3.3 --* Q8VYU9_ARATH)
Solyc10g019040.2	SL3.0ch10	11275939	11276306	Intron10	Exon11	Exon12	0.776153	1.24681	0.635761	1.66444	1.70713	1.69272	0.524994	0.0486237	Kinetochore protein nuf2, putative (AHRD V3.3 *** B9STF6_RICCO)
Solyc10g047210.1	SL3.0ch10	40137613	40137937	LastExon	Intergenic	Intergenic	2.42176	2.22442	2.47816	4.16456	3.56033	3.17805	0.653432	0.0405112	LOW QUALITY:hyccin (AHRD V3.3 *-* AT5G64090.1)
Solyc10g078540.2	SL3.0ch10	60470337	60470627	UTR3	UTR3	UTR3	2.96076	2.7344	3.18938	5.3358	3.88708	4.62263	0.641691	0.0478358	H/ACA ribonucleoprotein complex subunit 1-like protein 1, putative, expressed (AHRD V3.3 *-* Q2R242_ORYSJ)
Solyc10g078550.3	SL3.0ch10	60470337	60470627	LastExon	UTR3	Intergenic	2.96076	2.7344	3.18938	5.3358	3.88708	4.62263	0.641691	0.0478358	glutamate dehydrogenase
Solyc11g008470.2	SL3.0ch11	2663168	2663363	Intron4	Exon5	Exon5	0.795763	1.11954	0.784859	1.38332	1.31881	1.37696	0.661952	0.0483326	U4/U6.U5 tri-snRNP-associated protein 1 (AHRD V3.3 *** A0A0B2S142_GLYSO)
Solyc11g066790.2	SL3.0ch11	52890337	52890763	UTR3	UTR3	UTR3	5.26513	3.86664	6.29873	31.8551	19.3523	26.6352	0.198227	0.0254884	Helicase protein with RING/U-box domain-containing protein (AHRD V3.3 *** AT5G43530.1)
Solyc11g066800.2	SL3.0ch11	52890337	52890763	LastExon	UTR3	UTR3	5.26513	3.86664	6.29873	31.8551	19.3523	26.6352	0.198227	0.0254884	Amino acid transporter, putative (AHRD V3.3 *** B9SN74_RICCO)
Solyc11g071700.2	SL3.0ch11	55406558	55406873	Exon13	Exon14	Exon15	0.863232	1.0449	0.694811	1.35963	1.13039	1.42001	0.665709	0.0322906	Ubiquitin carboxyl-terminal hydrolase 12-like protein (AHRD V3.3 *** A0A0B0PTR8_GOSAR)
Solyc11g072320.2	SL3.0ch11	55822995	55823300	Intron17	Intron17	Intron17	1.08121	1.14786	1.04019	3.32794	3.67525	3.19536	0.32056	0.00268126	Arginine/serine-rich splicing factor RSP41, putative (AHRD V3.3 *-* Q0KIM7_SOLDE)
Solyc11g072320.2	SL3.0ch11	55814543	55814797	Intron4	UTR5	Intron5	1.33511	1.80012	1.21584	2.37877	2.12483	2.23714	0.645487	0.0323237	Arginine/serine-rich splicing factor RSP41, putative (AHRD V3.3 *-* Q0KIM7_SOLDE)
Solyc12g005180.2	SL3.0ch12	123977	124347	LastExon	UTR3	UTR3	1.49924	1.53492	1.4523	4.79128	4.77642	4.159	0.326842	0.00413512	Chloroplast lipocalin (AHRD V3.3 *** Q38JB4_SOLTU)
Solyc12g008790.2	SL3.0ch12	2140160	2140398	UTR3	UTR3	UTR3	1.2625	1.23717	1.27513	3.13536	3.94119	2.90736	0.378089	0.0220807	Acyl--UDP-N-acetylglucosamine O-acyltransferase (AHRD V3.3 *** D7MCK7_ARALL)
Solyc12g010640.2	SL3.0ch12	3593125	3593371	LastExon	LastExon	UTR3	10.0509	7.25808	10.3234	16.5427	16.2514	13.7788	0.593315	0.00889637	Aldolase-type TIM barrel family protein (AHRD V3.3 --* AT3G14130.4)
Solyc12g014160.2	SL3.0ch12	4999553	4999859	Exon2	LastIntron	LastIntron	9.38778	7.40091	10.4402	18.3642	20.0808	18.1171	0.481399	0.0014114	P-loop containing nucleoside triphosphate hydrolases superfamily protein (AHRD V3.3 *-* AT1G73170.4)
Solyc12g099660.2	SL3.0ch12	67696620	67696873	Exon4	Exon4	Intron4	0.892752	1.26358	0.986334	1.71204	1.59934	1.63554	0.635278	0.0248307	Glucosidase 2 subunit beta (AHRD V3.3 *** A0A0B2SD07_GLYSO)
